# Supplementary material for: Asymmetric one-pot transformation of isoflavones to pterocarpans and its application in phytoalexin synthesis
Source: PubMed Central journal article supplement (PMC7303153; doi:10.1038/s41467-020-16933-y), 2020-06-18
Supplement: 41467_2020_16933_MOESM1_ESM.pdf [file 41467_2020_16933_MOESM1_ESM.pdf]

Supplementary Information

**Asymmetric one-pot transformation of isoflavones to pterocarpan  
and its application in phytoalexin synthesis**

Ciesielski et al.

## Supplementary Note 1

### General Information

DMF and MeCN were dried over 4 Å molecular sieves. Dry DCM and THF were obtained from a solvent purification system MB-SPS-800. Et<sub>3</sub>N was freshly distilled over CaH<sub>2</sub>. All other commercially available reagents were used as received without further purification. All reactions were performed under argon atmosphere if not stated otherwise. TLC was performed on Merck silica gel 60 F<sub>254</sub> 0.2 mm precoated aluminium plates. Product spots were visualised by UV light (254 nm) and subsequently developed using anisaldehyde solution or permanganate solution as appropriate. Flash column chromatography was carried out using silica gel (Merck, particle size 40-63 microns). Melting points were measured on a Wagner & Munz PolyTherm A and are uncorrected. Infrared spectra were recorded on a Thermo Nicolet Avatar 360 instrument using ATR. NMR spectra were recorded on a Bruker AC-300 P (<sup>1</sup>H: 300 MHz, <sup>13</sup>C: 75 MHz), on a Bruker DRX 500 P (<sup>1</sup>H: 500 MHz, <sup>13</sup>C: 126 MHz) or a Bruker AC-600 P (<sup>1</sup>H: 600 MHz, <sup>13</sup>C: 151 MHz) spectrometer. Chemical shifts (δ) are quoted in parts per million (ppm) downfield of tetramethylsilane, using residual proton-containing solvent as internal standard (CDCl<sub>3</sub> at 7.27 ppm (<sup>1</sup>H) and 77.00 ppm (<sup>13</sup>C) or MeOD-*d*<sub>4</sub> at 3.31 ppm (<sup>1</sup>H) and 49.15 ppm (<sup>13</sup>C) or acetone-*d*<sub>6</sub> at 2.05 ppm (<sup>1</sup>H) and 29.92 ppm (<sup>13</sup>C) or DMSO-*d*<sub>4</sub> at 2.50 ppm (<sup>1</sup>H) and 39.51 ppm (<sup>13</sup>C)). Abbreviations used in the description of resonances are: s (singlet), d (doublet), t (triplet), q (quartet), br (broad), m (multiplet). Coupling constants (*J*) are quoted to the nearest 0.1 Hz. Mass spectra were recorded with an Agilent 5973N detector coupled with an Agilent 6890N GC (GC-MS, 70 eV) or else with a Bruker Esquire-LC (direct injection as a methanolic NH<sub>4</sub>OAc solution, ESI). HRMS spectra were recorded on an Agilent 6500 Series Q-TOF (ESI-TOF). Optical rotations were measured on a Perkin Elmer 341 LC polarimeter. Elemental analysis was performed on a Hekatech EA 3000. Enantiomeric excesses were determined by chiral HPLC on an Agilent 1100 Series with photodiode array detector (DAD) using

the chiral columns Chiralpak<sup>®</sup> AD (DAICEL, 250 mm, inner diameter 4.6 mm, particle size 10  $\mu\text{m}$ ), Lux<sup>®</sup> Cellulose-1 (Phenomenex, 250 mm, inner diameter 4.6 mm, particle size 5  $\mu\text{m}$ ) and Lux<sup>®</sup> Amylose-1 (Phenomenex, 250 mm, inner diameter 4.6 mm, particle size 5  $\mu\text{m}$ ). All measurements were carried out at ambient temperature. Unless stated otherwise, racemic samples were prepared according to the procedures described for the enantiomerically pure series using a racemic mixture of the chiral ligand in asymmetric transfer hydrogenation reaction.

## Supplementary Note 2

### First-Generation Synthesis: Preparation of Isoflavone 17

#### Improved Synthesis of 7-(Benzyloxy)-3-iodo-4*H*-chromen-4-one (15)

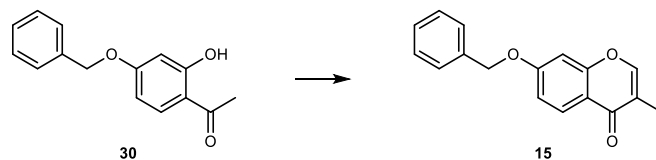

Acetophenone **30**<sup>1</sup> (6.079 g, 25.1 mmol) and *N,N*-dimethylformamide dimethyl acetal (13.3 mL, 100 mmol, 4.0 equiv.) were stirred in a 50 mL round-bottomed flask with distilling head at 95 °C for 6 h. Afterwards, all volatile components were distilled off in vacuo at 60 °C. The resulting red- to yellow-coloured solid was dissolved in CHCl<sub>3</sub> (50 mL), and pyridine (3.1 mL, 37.6 mmol, 1.5 equiv.) and iodine (12.74 g, 50.2 mmol, 2.0 equiv.) were added successively. The reaction mixture was stirred at room temperature for 15.5 h. Saturated aqueous sodium thiosulfate (30 mL) was added, and the mixture was stirred for 1 h. The aqueous layer was extracted four times with DCM, the combined organic layers were dried over MgSO<sub>4</sub>, and the solvents were removed in vacuo. The residue was dissolved in EtOAc/isohexane 1:1 (20 mL), and the solvents were removed again in vacuo. The resulting solid was suspended in a small amount of EtOAc, filtered off, and washed twice with isohexane to yield iodochromone **15** (6.36 g, 67%). The solvents of the combined organic layers were removed in vacuo, and the residue was purified by flash chromatography (isohexane:DCM:EtOAc 8:8:1 *v/v*) to afford **15** (2.94 g, 31%) as a white to yellowish solid (combined yield 98%).

mp: 124–126 °C (lit.<sup>1</sup> 126–128 °C); TLC (isohexane:DCM:EtOAc 8:8:1 *v/v*): R<sub>f</sub> = 0.35; <sup>1</sup>H NMR (500 MHz, CDCl<sub>3</sub>): δ 8.21 (s, 1H), 8.16 (d, *J* = 8.8 Hz, 1H), 7.35–7.49 (m, 5H), 7.08 (dd, *J* = 9.0 Hz, *J* = 2.4 Hz, 1H), 6.92 (d, *J* = 2.2 Hz, 1H), 5.17 (s, 2H) ppm; <sup>13</sup>C NMR (125 MHz, CDCl<sub>3</sub>): δ 172.56 (C<sub>q</sub>), 163.30 (C<sub>q</sub>), 157.80 (C<sub>q</sub>), 157.19 (CH), 135.40 (C<sub>q</sub>), 128.78 (CH), 128.49 (CH), 128.14 (CH), 127.52 (CH), 115.83 (C<sub>q</sub>), 115.76 (CH), 101.11 (CH), 87.14 (C<sub>q</sub>),

70.62 (CH<sub>2</sub>) ppm; IR (ATR): 3067, 1621, 1435, 1268, 1064, 825, 733 cm<sup>-1</sup>; GC-MS (EI): m/z = 378 [M]<sup>+</sup>.

### Synthesis of Iodobenzene **32**

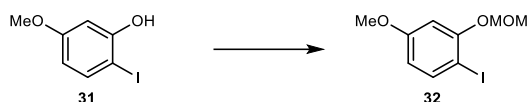

Iodophenol **31**<sup>2</sup> (1.653 g, 6.61 mmol) was dissolved in DCM (6.6 mL) and *N,N*-diisopropylethylamine (1.7 mL, 9.92 mmol, 1.5 equiv.) in a 10 mL round-bottomed flask and cooled to 0 °C. Methoxymethyl chloride (0.65 mL, 8.60 mmol, 1.3 equiv.) was added, and the reaction mixture was stirred at room temperature for 15 minutes. Saturated aqueous NH<sub>4</sub>Cl solution was added. The aqueous layer was extracted three times with DCM, the combined organic layers were dried over MgSO<sub>4</sub>, and the solvents were removed in vacuo. The residue was purified by flash chromatography (isohexane:EtOAc 4:1 v/v) to afford iodobenzene **32** (1.846 g, 95%) as a colourless liquid.

TLC (isohexane:EtOAc 4:1 v/v): R<sub>f</sub> = 0.42; <sup>1</sup>H NMR (300 MHz, CDCl<sub>3</sub>): δ 7.63 (d, *J* = 8.7 Hz, 1H), 6.70 (d, *J* = 2.6 Hz, 1H), 6.39 (dd, *J* = 8.7 Hz, *J* = 2.8 Hz, 1H), 5.23 (s, 2H), 3.79 (s, 3H), 3.52 (s, 3H) ppm; <sup>13</sup>C NMR (75 MHz, CDCl<sub>3</sub>): δ 161.18 (C<sub>q</sub>), 156.82 (C<sub>q</sub>), 139.13 (CH), 109.06 (CH), 102.36 (CH), 95.01 (CH<sub>2</sub>), 75.79 (C<sub>q</sub>), 56.40 (CH<sub>3</sub>), 55.51 (CH<sub>3</sub>) ppm; IR (ATR): 2956, 1472, 1151, 982, 830 cm<sup>-1</sup>; GC-MS (EI): m/z = 294 [M]<sup>+</sup>; analysis (calcd., found for C<sub>9</sub>H<sub>11</sub>IO<sub>3</sub>): C (36.76, 37.08), H (3.77, 3.84).

## Suzuki Coupling of Iodide **15** and the Boronic Acid **16**

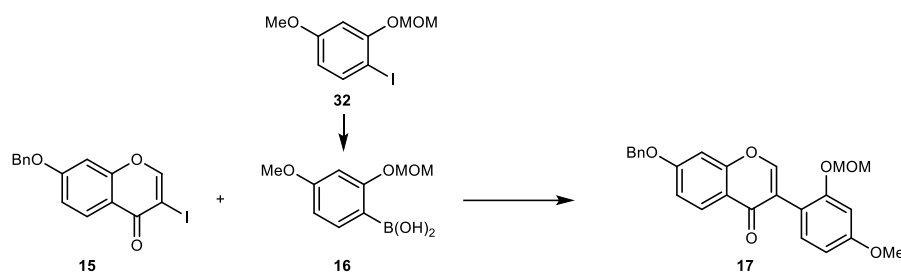

Iodobenzene **32** (1.833 g, 6.23 mmol, 2.0 equiv.) was dissolved in THF (14 mL) in a 50 mL round-bottomed flask and cooled to  $-78\text{ }^{\circ}\text{C}$ . *n*-Butyllithium solution (5.1 mL, 1.6M in hexanes, 8.10 mmol, 2.6 equiv.) was added over 15 min, and the reaction mixture was stirred for 5 min at  $-78\text{ }^{\circ}\text{C}$ . Triisopropyl borate (2.9 mL, 12.5 mmol, 4.0 equiv.) was added, and the reaction mixture was stirred for 20 min at  $-78\text{ }^{\circ}\text{C}$ . The dry-ice/acetone bath was removed, and the reaction mixture was stirred for 3.7 h and then poured onto 1 N hydrochloric acid. The aqueous layer was extracted three times with EtOAc, the combined organic layers were washed twice with brine and dried over  $\text{MgSO}_4$ , and the solvents were removed in vacuo. To the crude boronic acid was added iodide **15** (1.192 g, 3.15 mmol, 1.0 equiv.), potassium carbonate (1.307 g, 9.46 mmol, 3.0 equiv.), BHT (6.9 mg, 31.5  $\mu\text{mol}$ , 1 mol%), 1,4-dioxane (13 mL), and water (5.6 mL). The mixture was purged with argon for 10 min. Tricyclohexylphosphine (70.7 mg, 0.25 mmol, 8 mol%) and  $\text{Pd}_2(\text{dba})_3$  (115.5 mg, 0.13 mmol, 4 mol%) were added successively, and the reaction mixture was stirred at  $50\text{ }^{\circ}\text{C}$  for 20 min. The reaction mixture was cooled to room temperature, and saturated aqueous  $\text{NH}_4\text{Cl}$  solution was added. The aqueous layer was extracted three times with EtOAc, the combined organic layers were dried over  $\text{MgSO}_4$ , and the solvents were removed in vacuo. The residue was purified by repeated flash chromatography (1<sup>st</sup>: DCM:EtOAc 8:1; 2<sup>nd</sup>: isohexane:EtOAc 1:1 v/v) to afford isoflavone **17** (1.104 g, 84%) as an off-white solid.

mp:  $112\text{--}113\text{ }^{\circ}\text{C}$ ; TLC (isohexane:EtOAc 2:1 v/v):  $R_f = 0.30$ ;  $^1\text{H NMR}$  (300 MHz,  $\text{CDCl}_3$ ):  $\delta$  8.21 (d,  $J = 9.1\text{ Hz}$ , 1H), 7.88 (s, 1H), 7.33–7.50 (m, 5H), 7.24 (d,  $J = 8.3\text{ Hz}$ , 1H), 7.07 (dd,  $J$

= 9.0 Hz,  $J = 2.4$  Hz, 1H), 6.94 (d,  $J = 2.5$  Hz, 1H), 6.82 (d,  $J = 2.5$  Hz, 1H), 6.63 (dd,  $J = 8.5$  Hz,  $J = 2.5$  Hz, 1H), 5.19 (s, 2H), 5.13 (s, 2H), 3.84 (s, 3H), 3.43 (s, 3H) ppm;  $^{13}\text{C}$  NMR (75 MHz,  $\text{CDCl}_3$ ):  $\delta$  175.59 ( $\text{C}_q$ ), 162.85 ( $\text{C}_q$ ), 160.96 ( $\text{C}_q$ ), 157.88 ( $\text{C}_q$ ), 156.42 ( $\text{C}_q$ ), 153.54 (CH), 135.78 ( $\text{C}_q$ ), 132.11 (CH), 128.76 (CH), 128.38 (CH), 127.86 (CH), 127.49 (CH), 122.49 ( $\text{C}_q$ ), 118.64 ( $\text{C}_q$ ), 114.80 (CH), 114.29 ( $\text{C}_q$ ), 106.66 (CH), 102.22 (CH), 101.31 (CH), 95.10 ( $\text{CH}_2$ ), 70.50 ( $\text{CH}_2$ ), 56.11 ( $\text{CH}_3$ ), 55.45 ( $\text{CH}_3$ ) ppm; IR (ATR): 2955, 1606, 1256, 1006, 696  $\text{cm}^{-1}$ ; GC-MS (EI):  $m/z = 418$   $[\text{M}]^+$ ; analysis (calcd., found for  $\text{C}_{25}\text{H}_{22}\text{O}_6$ ): C (71.76, 71.56), H (5.30, 5.68).

## Supplementary Note 3

### First-Generation Synthesis: Preparation of Isoflavanone 18

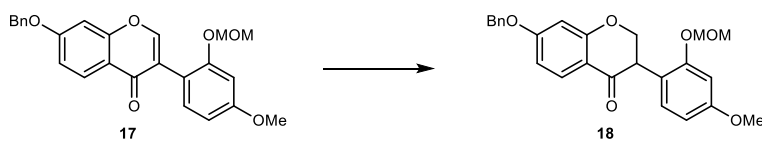

Isoflavone **17** (417.6 mg, 1.00 mmol, 1.0 equiv.) was dissolved in THF (8.0 mL) in a 25 mL round-bottomed flask and cooled to  $-78$   $^{\circ}\text{C}$ . L-selectride (1.2 mL, 1 M in THF, 1.20 mmol, 1.2 equiv.) was added, and the reaction mixture was stirred at  $-78$   $^{\circ}\text{C}$  for 65 min. The reaction was quenched by the addition of methanol (2 mL), warmed to room temperature, and saturated aqueous  $\text{NH}_4\text{Cl}$  solution was added. The aqueous layer was extracted three times with EtOAc, the combined organic layers were dried over  $\text{MgSO}_4$ , and the solvents were removed in vacuo. The residue was purified by flash chromatography (isohexane:EtOAc 2:1  $v/v$ ) to afford isoflavanone **18** (393.7 mg,  $\approx 94\%$ ) as a white solid.

mp:  $27$ – $53$   $^{\circ}\text{C}$ ; TLC (isohexane:EtOAc 2:1  $v/v$ ):  $R_f = 0.46$ ;  $^1\text{H}$  NMR (300 MHz,  $\text{CDCl}_3$ ):  $\delta$  7.94 (d,  $J = 8.9$  Hz, 1H), 7.32–7.48 (m, 5H), 7.03 (d,  $J = 8.5$  Hz, 1H), 6.75 (d,  $J = 2.5$  Hz, 1H), 6.70 (dd,  $J = 8.8$  Hz,  $J = 2.4$  Hz, 1H), 6.50–6.58 (m, 2H), 5.14 (s, 2H), 5.12 (s, 2H), 4.63 (dd,  $J =$

11.7 Hz,  $J = 10.8$  Hz, 1H), 4.51 (dd,  $J = 10.8$  Hz,  $J = 5.1$  Hz, 1H), 4.26 (dd,  $J = 11.7$  Hz,  $J = 5.5$  Hz, 1H), 3.80 (s, 3H), 3.44 (s, 3H) ppm;  $^{13}\text{C}$  NMR (75 MHz,  $\text{CDCl}_3$ ):  $\delta$  191.32 ( $\text{C}_q$ ), 164.82 ( $\text{C}_q$ ), 163.68 ( $\text{C}_q$ ), 160.37 ( $\text{C}_q$ ), 156.17 ( $\text{C}_q$ ), 135.96 ( $\text{C}_q$ ), 130.77 (CH), 129.39 (CH), 128.72 (CH), 128.30 (CH), 127.51 (CH), 116.40 ( $\text{C}_q$ ), 115.71 ( $\text{C}_q$ ), 110.41 (CH), 106.61 (CH), 101.76 (CH), 101.73 (CH), 94.61 ( $\text{CH}_2$ ), 71.26 ( $\text{CH}_2$ ), 70.29 ( $\text{CH}_2$ ), 56.19 ( $\text{CH}_3$ ), 55.40 ( $\text{CH}_3$ ), 47.69 (CH) ppm; IR (ATR): 2915, 1604, 1238, 1154, 992, 834  $\text{cm}^{-1}$ ; GC-MS (EI):  $m/z = 420$   $[\text{M}]^+$ ; analysis (calcd., found for  $\text{C}_{25}\text{H}_{24}\text{O}_6$ ): C (71.42, 71.79), H (5.75, 6.13).

## Supplementary Note 4

### First-Generation Synthesis: Preparation of Isoflavanone 9

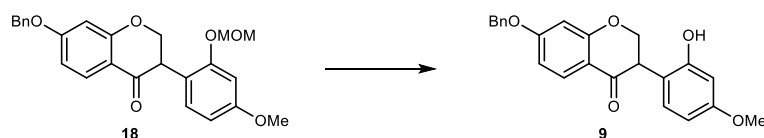

Isoflavanone **18** (731.8 mg, 1.74 mmol, 1.0 equiv.) was dissolved in THF (25 mL) and methanol (25 mL) in a 100 mL round-bottomed flask. Hydrochloric acid (8.7 mL, 6 M in water, 52 mmol, 30 equiv.) was added, and the reaction mixture was stirred at 60 °C for 35 min. The reaction mixture was cooled to room temperature, and saturated aqueous  $\text{NaHCO}_3$  solution was added. The aqueous layer was extracted three times with EtOAc, the combined organic layers were dried over  $\text{MgSO}_4$ , and the solvents were removed in vacuo. The residue was purified by flash chromatography (DCM:EtOAc 20:1  $v/v$ ) to afford isoflavanone **9** (488.0 mg, 74%) as a white solid and starting material **18** (95.0 mg, 13%).

**9**: mp: 137–138 °C; TLC (isohexane:EtOAc 2:1  $v/v$ ):  $R_f = 0.43$ ;  $^1\text{H}$  NMR (300 MHz,  $\text{CDCl}_3$ ):  $\delta$  8.37 (s, 1H), 7.86 (d,  $J = 8.9$  Hz, 1H), 7.33–7.46 (m, 6H), 6.67 (dd,  $J = 9.0$  Hz,  $J = 2.4$  Hz, 1H), 6.55 (d,  $J = 2.6$  Hz, 1H), 6.53 (d,  $J = 2.5$  Hz, 1H), 6.47 (dd,  $J = 8.5$  Hz,  $J = 2.6$  Hz, 1H), 5.11 (s, 2H), 4.97 (dd,  $J = 11.9$  Hz,  $J = 3.0$  Hz, 1H), 4.82 (dd,  $J = 12.1$  Hz,  $J = 4.5$  Hz, 1H), 3.93



(dd,  $J = 4.5$  Hz,  $J = 3.0$  Hz, 1H), 3.76 (s, 3H) ppm;  $^{13}\text{C}$  NMR (75 MHz,  $\text{CDCl}_3$ ):  $\delta$  192.89 ( $\text{C}_q$ ), 166.12 ( $\text{C}_q$ ), 163.71 ( $\text{C}_q$ ), 160.73 ( $\text{C}_q$ ), 156.68 ( $\text{C}_q$ ), 135.62 ( $\text{C}_q$ ), 130.00 (CH), 128.75 (CH), 128.40 (CH), 127.49 (CH), 127.30 (CH), 115.01 ( $\text{C}_q$ ), 112.79 ( $\text{C}_q$ ), 111.32 (CH), 107.17 (CH), 103.44 (CH), 101.62 (CH), 70.42 ( $\text{CH}_2$ ), 69.94 ( $\text{CH}_2$ ), 55.29 ( $\text{CH}_3$ ), 45.48 (CH) ppm; IR (ATR): 3201, 1435, 1243, 1166, 1107, 845, 730  $\text{cm}^{-1}$ ; MS (ESI):  $m/z = 377.5$   $[\text{M}+\text{H}]^+$ ; analysis (calcd., found for  $\text{C}_{23}\text{H}_{20}\text{O}_5$ ): C (73.39, 73.15), H (5.36, 5.46).

## Supplementary Note 5

### First-Generation Synthesis: Preparation of Isoflavan-4-ol **8** from Isoflavanone **9**

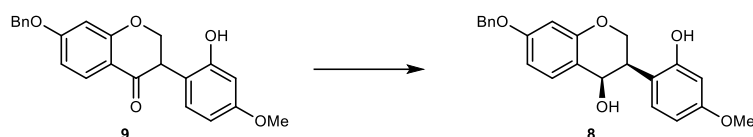

Preparation of the catalyst solution:

$[\text{Ru}(p\text{-cym})\text{Cl}_2]_2$  (22.3 mg, 36.4  $\mu\text{mol}$ ) and (*R,R*)-TsDPEN (27.3 mg, 72.8  $\mu\text{mol}$ ) were dissolved in EtOAc (2.2 mL) in a 5 mL round-bottomed flask. Another flask containing triethylamine (1.5 mL) was cooled to 0  $^\circ\text{C}$ , and formic acid (0.5 mL) was added. The mixture was stirred vigorously for 5 min at room temperature. An aliquot of this mixture (1.14 mL) was added to the ruthenium catalyst, and the resulting solution was stirred for another 5 min.

Reaction:

In a 5 mL round-bottomed flask isoflavanone **9** (450.9 mg, 1.20 mmol, 1.0 equiv.) was suspended in EtOAc (1.5 mL) at 45  $^\circ\text{C}$ , and an aliquot of the catalyst solution (2.73 mL, ca. 5 mol% catalyst) was added. The reaction mixture was stirred at 45  $^\circ\text{C}$  to 50  $^\circ\text{C}$  for 1.5 h, cooled to room temperature, and saturated aqueous  $\text{NH}_4\text{Cl}$  solution was added. The aqueous layer was extracted three times with EtOAc. The combined organic layers were dried over  $\text{MgSO}_4$ , the

solvents were removed in vacuo, and the residue was purified by flash chromatography (DCM:EtOAc 10:1 *v/v*) to afford isoflavanol **8** (403.2 mg, 89%, >99% *ee*) as a white solid.

mp: 141–142 °C; TLC (DCM:EtOAc 2:1 *v/v*):  $R_f = 0.39$ ;  $[\alpha]_D^{25} = +30.3$  (*c* 1.0 CHCl<sub>3</sub>); <sup>1</sup>H NMR (300 MHz, CDCl<sub>3</sub>): δ 8.08 (s, 1H), 7.33–7.47 (m, 5H), 7.15 (d, *J* = 8.5 Hz, 1H), 7.02 (d, *J* = 8.3 Hz, 1H), 6.61 (dd, *J* = 8.4 Hz, *J* = 2.5 Hz, 1H), 6.53 (d, *J* = 2.5 Hz, 1H), 6.43–6.51 (m, 2H), 5.06 (s, 2H), 4.99 (br. s, 1H), 4.80 (dd, *J* = 12.4 Hz, *J* = 10.9 Hz, 1H), 4.21 (ddd, *J* = 10.8 Hz, *J* = 4.0 Hz, *J* = 1.1 Hz, 1H), 3.79 (s, 3H), 3.34 (dt, *J* = 12.1 Hz, *J* = 3.4 Hz, 1H), 2.47 (d, *J* = 2.5 Hz, 1H) ppm; <sup>13</sup>C NMR (75 MHz, CDCl<sub>3</sub>): δ 160.61 (C<sub>q</sub>), 160.51 (C<sub>q</sub>), 156.43 (C<sub>q</sub>), 155.12 (C<sub>q</sub>), 136.64 (C<sub>q</sub>), 132.17 (CH), 130.44 (CH), 128.62 (CH), 128.05 (CH), 127.43 (CH), 116.41 (C<sub>q</sub>), 116.29 (C<sub>q</sub>), 108.67 (CH), 106.71 (CH), 103.65 (CH), 102.63 (CH), 70.06 (CH<sub>2</sub>), 68.67 (CH), 63.67 (CH<sub>2</sub>), 55.30 (CH<sub>3</sub>), 43.86 (CH) ppm; IR (ATR): 3490, 3360, 1164, 1018, 831, 731 cm<sup>-1</sup>; MS (ESI): *m/z* = 377.5 [M–H]<sup>-</sup>; analysis (calcd., found for C<sub>23</sub>H<sub>22</sub>O<sub>5</sub>): C (73.00, 72.94), H (5.86, 6.22).

## Supplementary Note 6

### First-Generation Synthesis: Preparation of Isoflavone 10

#### Synthesis of Bromobenzene 34

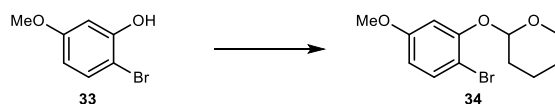

Bromophenol **33**<sup>2</sup> (1.001 g, 4.93 mmol, 1.0 equiv.) was dissolved in DCM (4.9 mL) in a 10 mL round-bottomed flask, and 3,4-dihydro-2*H*-pyran (1.8 mL, 19.7 mmol, 4.0 equiv.) and pyridinium *p*-toluenesulfonate (123.9 mg, 0.49 mmol, 0.1 equiv.) were added successively. The reaction mixture was stirred at room temperature for 2 h. Saturated aqueous NaHCO<sub>3</sub> solution was added, and the aqueous layer was extracted three times with DCM. The combined organic

layers were dried over MgSO<sub>4</sub>, and the solvents were removed in vacuo. The residue was purified by flash chromatography (isohexane:EtOAc 4:1 v/v) to afford bromobenzene **34** (1.371 g, 97%) as a colourless liquid.

TLC (isohexane:EtOAc 4:1 v/v): R<sub>f</sub> = 0.56; <sup>1</sup>H NMR (300 MHz, CDCl<sub>3</sub>): δ 7.41 (d, *J* = 8.8 Hz, 1H), 6.77 (d, *J* = 2.8 Hz, 1H), 6.46 (dd, *J* = 8.8 Hz, *J* = 2.8 Hz, 1H), 5.49 (t, *J* = 2.8 Hz, 1H), 3.91 (td, *J* = 11.1 Hz, *J* = 3.0 Hz, 1H), 3.78 (s, 3H), 3.59–3.65 (m, 1H), 2.05–2.17 (m, 1H), 1.95–2.01 (m, 1H), 1.83–1.92 (m, 1H), 1.59–1.78 (m, 3H) ppm; <sup>13</sup>C NMR (126 MHz, CDCl<sub>3</sub>): δ 159.92 (C<sub>q</sub>), 154.02 (C<sub>q</sub>), 132.95 (CH), 107.85 (CH), 103.76 (C<sub>q</sub>), 103.56 (CH), 96.75 (CH), 61.78 (CH<sub>2</sub>), 55.51 (CH<sub>3</sub>), 30.14 (CH<sub>2</sub>), 25.18 (CH<sub>2</sub>), 18.27 (CH<sub>2</sub>) ppm; IR (ATR): 2942, 1199, 1165, 1020, 965, 900 cm<sup>-1</sup>; GC-MS (EI): *m/z* = 286 [M]<sup>+</sup>; analysis (calcd., found for C<sub>12</sub>H<sub>15</sub>BrO<sub>3</sub>): C (50.19, 50.53), H (5.27, 5.62).

### Suzuki Coupling of Iodide **15** and the Boronic Acid **19**

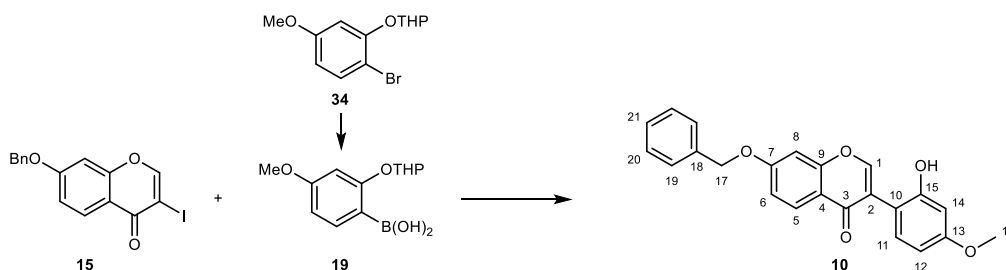

Bromobenzene **34** (961.5 mg, 3.35 mmol, 1.5 equiv.) was dissolved in THF (6.7 mL) and triisopropyl borate (1.6 mL, 6.70 mmol, 3.0 equiv.) in a 10 mL round-bottomed flask and cooled to -78 °C. *n*-Butyllithium solution (3.8 mL, 1.6M in hexanes, 6.03 mmol, 2.7 equiv.) was added over 15 min, and the reaction mixture was stirred for 45 min at -78 °C. The dry-ice/acetone bath was removed, and the reaction mixture was stirred for 1.5 h and then poured onto saturated aqueous NH<sub>4</sub>Cl solution. The aqueous layer was extracted three times with EtOAc, the combined organic layers were washed twice with brine and dried over MgSO<sub>4</sub>, and the solvents were removed in vacuo. To the crude boronic acid was added iodide **15** (844.2 mg, 2.23 mmol,

1.0 equiv.), potassium carbonate (925.6 mg, 6.70 mmol, 3.0 equiv.), BHT (4.9 mg, 22.3  $\mu$ mol, 1 mol%), 1,4-dioxane (9.2 mL), and water (3.9 mL). The mixture was purged with argon for 5 min. Tricyclohexylphosphine (31.3 mg, 0.11 mmol, 5 mol%) and Pd<sub>2</sub>(dba)<sub>3</sub> (51.1 mg, 55.8  $\mu$ mol, 2.5 mol%) were added successively, and the reaction mixture was stirred at 50 °C for 1 h. Concentrated hydrochloric acid (2.2 mL) was added carefully and the reaction mixture was stirred for 10 min at 50 °C. The reaction mixture was cooled to room temperature and diluted with water. The aqueous layer was extracted three times with DCM, the combined organic layers were dried over MgSO<sub>4</sub>, and the solvents were removed in vacuo. The residue was suspended in pentane (40 mL), and the product **10** was filtered off (655.0 mg, 78%) as a yellowish solid.

mp: 170–172 °C; TLC (DCM:isohexane:EtOAc 10:5:1 v/v): R<sub>f</sub> = 0.37; <sup>1</sup>H NMR (600 MHz, CDCl<sub>3</sub>):  $\delta$  9.33 (s, 1H, OH-15), 8.28 (d, 1H, <sup>3</sup>J<sub>5/6</sub> = 9.0 Hz, H-5), 8.05 (s, 1H, H-1), 7.36–7.49 (m, 5H, H-19, H-20, H-21), 7.15 (dd, 1H, <sup>3</sup>J<sub>6/5</sub> = 9.0 Hz, <sup>4</sup>J<sub>6/8</sub> = 2.3 Hz, H-6), 7.07 (d, 1H, <sup>3</sup>J<sub>11/12</sub> = 8.7 Hz, H-11), 7.00 (d, 1H, <sup>4</sup>J<sub>8/6</sub> = 2.3 Hz, H-8), 6.66 (d, 1H, <sup>4</sup>J<sub>14/12</sub> = 2.6 Hz, H-14), 6.55 (dd, 1H, <sup>3</sup>J<sub>12/11</sub> = 8.5 Hz, <sup>4</sup>J<sub>12/14</sub> = 2.4 Hz, H-12), 5.21 (s, 2H, H-17), 3.83 (s, 3H, H-16) ppm; <sup>13</sup>C NMR (151 MHz, CDCl<sub>3</sub>):  $\delta$  178.76 (C<sub>q</sub>, C-3), 163.76 (C<sub>q</sub>, C-7), 161.98 (C<sub>q</sub>, C-13), 157.94 (C<sub>q</sub>, C-9), 157.76 (C<sub>q</sub>, C-15), 154.60 (CH, C-1), 135.41 (C<sub>q</sub>, C-18), 130.18 (CH, C-11), 128.82 (CH, C-20), 128.52 (CH, C-21), 127.92 (CH, C-5), 127.53 (CH, C-19), 124.88 (C<sub>q</sub>, C-2), 117.19 (C<sub>q</sub>, C-4), 116.15 (CH, C-6), 112.86 (C<sub>q</sub>, C-10), 107.63 (CH, C-12), 104.30 (CH, C-14), 100.83 (CH, C-8), 70.72 (CH<sub>2</sub>, C-17), 55.36 (CH<sub>3</sub>, C-16) ppm; IR (ATR): 1542, 1235, 1198, 843, 806, 690 cm<sup>-1</sup>; MS (ESI): m/z = 375.1 [M+H]<sup>+</sup>; analysis (calcd., found for C<sub>23</sub>H<sub>18</sub>O<sub>5</sub>): C (73.79, 73.73), H (4.85, 4.81).

## Supplementary Note 7

### First-Generation Synthesis: ATH Cascade from Isoflavone **10** to Isoflavanol **8**

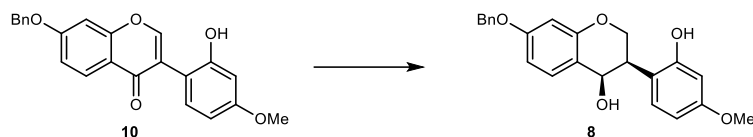

Preparation of the catalyst solution:

[Ru(*p*-cym)Cl<sub>2</sub>]<sub>2</sub> (4.3 mg, 7.0 μmol) and (*R,R*)-TsDPEN (7.8 mg, 21.3 μmol) were dissolved in EtOAc (0.42 mL) in a 5 mL round-bottomed flask. Another flask containing triethylamine (1.5 mL) was cooled to 0 °C, and formic acid (0.5 mL) was added. The mixture was stirred vigorously for 5 min at room temperature. An aliquot of this mixture (1.1 mL) was added to the ruthenium catalyst, and the resulting solution was stirred for another 5 min.

Reaction:

In a 5 mL round-bottomed flask isoflavone **10** (359.1 mg, 0.96 mmol, 1.0 equiv.) was suspended in EtOAc (1.2 mL) at 45 °C, and an aliquot of the catalyst solution (1.04 mL, ca. 1 mol% catalyst) was added. The reaction mixture was stirred at 45 °C for 17 h, cooled to room temperature, and saturated aqueous NH<sub>4</sub>Cl solution was added. The aqueous layer was extracted three times with EtOAc. The combined organic layers were dried over MgSO<sub>4</sub>, the solvents were removed in vacuo, and the residue was purified by flash chromatography (DCM:EtOAc 10:1 *v/v*) to afford isoflavanol **8** (333.1 mg, 92%, >99% *ee*) as a white solid.

For analytical data, see Supplementary Note 5.

## Supplementary Note 8

### First-Generation Synthesis: Preparation of Vestitol (7)

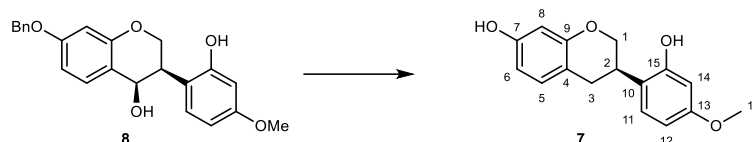

Isoflavanol **8** (52.5 mg, 0.14 mmol, 1.0 equiv.) was dissolved in dry ethanol (6.0 mL) in a 10 mL round-bottomed flask, and 10% Pd/C (14.8 mg, 13.9  $\mu\text{mol}$ , 0.1 equiv.) was added. The reaction mixture was stirred under hydrogen atmosphere (balloon) for 23.5 h at room temperature. The mixture was filtered through a short pad of celite, and the solvent was removed in vacuo. The residue was purified by flash chromatography (DCM:EtOAc 10:1 *v/v*) to afford vestitol (**7**, 29.2 mg, 77%, 97% *ee*) as a white solid.

mp: 151–153 °C (lit.<sup>3</sup> 144–145 °C); TLC (DCM:EtOAc 5:1 *v/v*):  $R_f = 0.38$ ;  $[\alpha]_D^{20} = -9.4$  (*c* 0.42 MeOH) (lit.<sup>3</sup>  $[\alpha]_D^{20} = -5$  (*c* 0.27 MeOH), lit.<sup>4</sup>  $[\alpha]_D^{22} = -18.9$  (*c* 0.5 MeOH)); <sup>1</sup>H NMR (600 MHz, acetone-*d*<sub>6</sub>):  $\delta$  8.49 (s, 1H, OH-15), 8.06 (s, 1H, OH-7), 7.05 (d, 1H, <sup>3</sup> $J_{11/12} = 8.3$  Hz, H-11), 6.89 (d, 1H, <sup>3</sup> $J_{5/6} = 8.3$  Hz, H-5), 6.50 (d, 1H, <sup>4</sup> $J_{14/12} = 2.6$  Hz, H-14), 6.43 (dd, 1H, <sup>3</sup> $J_{12/11} = 8.5$  Hz, <sup>4</sup> $J_{12/14} = 2.4$  Hz, H-12), 6.36 (dd, 1H, <sup>3</sup> $J_{6/5} = 8.1$  Hz, <sup>4</sup> $J_{6/7} = 2.4$  Hz, H-6), 6.28 (d, 1H, <sup>4</sup> $J_{8/6} = 2.6$  Hz, H-8), 4.24 (ddd, 1H, <sup>2</sup> $J_{1a/1b} = 10.4$  Hz, <sup>3</sup> $J_{1a/2} = 3.4$  Hz, <sup>4</sup> $J_{1a/3b} = 2.1$  Hz, H-1a), 3.98 (t, 1H, <sup>2</sup> $J_{1b/1a} = 3J_{1b/2} = 10.2$  Hz, H-1b), 3.72 (s, 3H, H-16), 3.48 (dddd, 1H, <sup>3</sup> $J_{2/3a} = 10.9$  Hz, <sup>3</sup> $J_{2/1b} = 10.2$  Hz, <sup>3</sup> $J_{2/3b} = 4.9$  Hz, <sup>3</sup> $J_{2/1a} = 3.4$  Hz, H-2), 2.97 (ddd, 1H, <sup>2</sup> $J_{3a/3b} = 15.4$  Hz, <sup>3</sup> $J_{3a/2} = 10.9$  Hz, <sup>4</sup> $J_{3a/1b} = 0.8$  Hz, H-3a), 2.81 (ddd, 1H, <sup>2</sup> $J_{3b/3a} = 15.5$  Hz, <sup>3</sup> $J_{3b/2} = 5.0$  Hz, <sup>4</sup> $J_{3b/1a} = 2.1$  Hz, H-3b) ppm; <sup>13</sup>C NMR (151 MHz, acetone-*d*<sub>6</sub>):  $\delta$  160.49 (C<sub>q</sub>, C-13), 157.60 (C<sub>q</sub>, C-7), 156.79 (C<sub>q</sub>, C-15), 156.20 (C<sub>q</sub>, C-9), 131.10 (CH, C-5), 128.84 (CH, C-11), 121.02 (C<sub>q</sub>, C-10), 114.41 (C<sub>q</sub>, C-4), 108.84 (CH, C-6), 105.78 (CH, C-12), 103.76 (CH, C-8), 102.60 (CH, C-14), 70.58 (CH<sub>2</sub>, C-1), 55.45 (CH<sub>3</sub>, C-16), 32.71 (CH, C-2), 31.15 (CH<sub>2</sub>, C-3) ppm; IR (ATR): 3350, 1141,

1114, 1031, 794  $\text{cm}^{-1}$ ; MS (ESI):  $m/z = 273.1$   $[\text{M}+\text{H}]^+$ ; analysis (calcd., found for  $\text{C}_{16}\text{H}_{16}\text{O}_4$ ): C (70.58, 70.84), H (5.92, 5.89).

## Supplementary Note 9

### First-Generation Synthesis: Preparation of Isoflavan-4-ol **20**

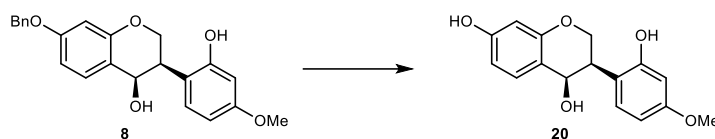

Isoflavanol **8** (46.8 mg, 0.12 mmol, 1.0 equiv.) was dissolved in dry ethanol (6.2 mL) in a 10 mL round-bottomed flask, and 10% Pd/C (13.2 mg, 12.4  $\mu\text{mol}$ , 0.1 equiv.) and pyridine (0.01 mL, 0.14 mmol, 1.1 equiv.) were added successively. The reaction mixture was stirred under hydrogen atmosphere (balloon) for 1.8 h at room temperature. The mixture was filtered through a short pad of celite, and the solvent was removed in vacuo. The residue was purified by flash chromatography (DCM:EtOAc 5:1  $v/v$ ) to afford isoflavanol **20** (41.3 mg,  $\approx 96\%$ ,  $>99\%$  *ee*) as a white solid with small impurities.

mp: 181–183  $^{\circ}\text{C}$ ; TLC (DCM:EtOAc 5:1  $v/v$ ):  $R_f = 0.18$ ;  $[\alpha]_{\text{D}}^{20} = +148.8$  ( $c$  0.4 acetone);  $^1\text{H}$  NMR (300 MHz, acetone- $d_6$ ):  $\delta$  8.87 (s, 1H), 8.31 (s, 1H), 7.11 (d,  $J = 8.3$  Hz, 1H), 7.08 (d,  $J = 8.3$  Hz, 1H), 6.45 (d,  $J = 2.6$  Hz, 1H), 6.37–6.43 (m, 2H), 6.30 (d,  $J = 2.5$  Hz, 1H), 4.82 (br. s., 1H), 4.62 (dd,  $J = 12.5$  Hz,  $J = 10.2$  Hz, 1H), 4.57 (br. s., 1H), 4.10 (ddd,  $J = 10.2$  Hz,  $J = 3.6$  Hz,  $J = 1.3$  Hz, 1H), 3.73 (s, 3H), 3.46 (dt,  $J = 12.2$  Hz,  $J = 3.3$  Hz, 1H) ppm;  $^{13}\text{C}$  NMR (75 MHz, acetone- $d_6$ ):  $\delta$  160.78 ( $\text{C}_q$ ), 159.38 ( $\text{C}_q$ ), 157.34 ( $\text{C}_q$ ), 156.13 ( $\text{C}_q$ ), 132.32 (CH), 131.51 (CH), 118.57 ( $\text{C}_q$ ), 118.17 ( $\text{C}_q$ ), 108.88 (CH), 105.78 (CH), 103.50 (CH), 102.93 (CH), 66.90 (CH), 64.83 ( $\text{CH}_2$ ), 55.44 ( $\text{CH}_3$ ), 40.78 (CH) ppm; IR (ATR): 3551, 3424, 3190, 1444, 1152, 1104, 1029, 821, 798  $\text{cm}^{-1}$ ; MS (ESI):  $m/z = 286.7$   $[\text{M}-\text{H}]^-$ ; analysis (calcd., found for  $\text{C}_{16}\text{H}_{16}\text{O}_5$ ): C (66.66, 66.40), H (5.59, 5.57).

## Supplementary Note 10

### First-Generation Synthesis: Preparation of Medicarpin (5) from Isoflavan-4-ol 8

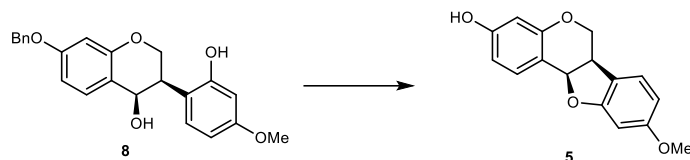

Isoflavanol **8** (720.0 mg, 1.85 mmol, 1.0 equiv.) was dissolved in dry ethanol (90 mL) in a 250 mL round-bottomed flask, and 10% Pd/C (202.5 mg, 0.19 mmol, 0.1 equiv.) and pyridine (0.17 mL, 2.0 mmol, 1.1 equiv.) were added successively. The reaction mixture was stirred under hydrogen atmosphere (balloon) for 50 min at room temperature. The hydrogen atmosphere was replaced by argon, hydrochloric acid (0.21 mL) was added, and the reaction mixture was stirred for 20 min at room temperature. The mixture was filtered through a short pad of celite/NaHCO<sub>3</sub> (1:1), and the solvent was removed in vacuo. The residue was purified by flash chromatography (DCM:EtOAc 10:1 v/v) to afford medicarpin (**5**, 449.9 mg, 90%, >99% *ee*) as a white solid.

mp: 128–129 °C (lit.<sup>5</sup> 193 °C); TLC (DCM:EtOAc 10:1 v/v): R<sub>f</sub> = 0.46; [α]<sub>D</sub><sup>20</sup> = −196.4 (*c* 0.05 CHCl<sub>3</sub>) (lit.<sup>5</sup> [α]<sub>D</sub><sup>20</sup> = −188 (*c* 0.106 CHCl<sub>3</sub>)); <sup>1</sup>H NMR (500 MHz, CDCl<sub>3</sub>): δ 7.39 (d, *J* = 8.5 Hz, 1H), 7.12–7.16 (m, 1H), 6.55 (dd, *J* = 8.5 Hz, *J* = 2.5 Hz, 1H), 6.45–6.49 (m, 2H), 6.42 (d, *J* = 2.5 Hz, 1H), 5.51 (d, *J* = 6.9 Hz, 1H), 5.38 (br. s, 1H), 4.25 (dd, *J* = 11.0 Hz, *J* = 4.7 Hz, 1H), 3.78 (s, 3H), 3.64 (t, *J* = 11.0 Hz, 1H), 3.54 (ddd, *J* = 11.0 Hz, *J* = 6.5 Hz, *J* = 4.9 Hz, 1H) ppm; <sup>13</sup>C NMR (126 MHz, CDCl<sub>3</sub>): δ 161.03 (C<sub>q</sub>), 160.57 (C<sub>q</sub>), 157.00 (C<sub>q</sub>), 156.58 (C<sub>q</sub>), 132.18 (CH), 124.75 (CH), 119.09 (C<sub>q</sub>), 112.53 (C<sub>q</sub>), 109.78 (CH), 106.41 (CH), 103.64 (CH), 96.89 (CH), 78.53 (CH), 66.49 (CH<sub>2</sub>), 55.50 (CH<sub>3</sub>), 39.42 (CH) ppm; IR (ATR): 3399, 1454, 1145, 1016, 941, 822, 789 cm<sup>-1</sup>; GC-MS (EI): *m/z* = 270 [M]<sup>+</sup>.



## Supplementary Note 11

### First-Generation Synthesis: Preparation of Homoptercarpin (4)

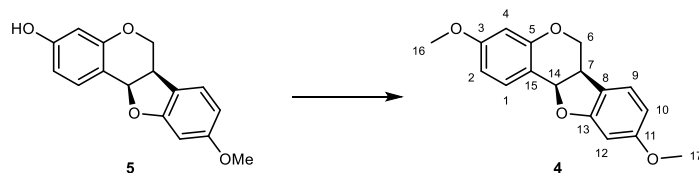

Medicarpin (**5**, 236.3 mg, 0.87 mmol, 1.0 equiv.) was dissolved in acetone (8.7 mL) in a 10 mL round-bottomed flask. Potassium carbonate (483.3 mg, 3.50 mmol, 4.0 equiv.) and iodomethane (0.22 mL, 3.50 mmol, 4.0 equiv.) were added successively. The reaction flask was sealed and heated to 56 °C for 23.5 h. The reaction mixture was cooled to room temperature, and 0.5 M hydrochloric acid was added. The aqueous layer was extracted three times with EtOAc, and the combined organic layers were dried over MgSO<sub>4</sub>. The solvents were removed in vacuo, and the residue was purified by flash chromatography (DCM:EtOAc 15:1 v/v) to afford homoptercarpin (**4**, 238.7 mg, 96%, >99% *ee*) as a white solid.

mp: 85–86 °C (lit.<sup>6</sup> 86 °C); TLC (DCM:EtOAc 15:1 v/v): R<sub>f</sub> = 0.63; [α]<sub>D</sub><sup>20</sup> = –211.2 (*c* 1.16 CHCl<sub>3</sub>) (lit.<sup>6</sup> [α]<sub>D</sub><sup>25</sup> = –205 (*c* 0.02 CHCl<sub>3</sub>)); <sup>1</sup>H NMR (600 MHz, CDCl<sub>3</sub>): δ 7.44 (d, 1H, <sup>3</sup>J<sub>1/2</sub> = 8.5 Hz, H-1), 7.14 (d, 1H, <sup>3</sup>J<sub>9/10</sub> = 8.8 Hz, H-9), 6.65 (dd, 1H, <sup>3</sup>J<sub>2/1</sub> = 8.6 Hz, <sup>4</sup>J<sub>2/4</sub> = 2.5 Hz, H-2), 6.48 (d, 1H, <sup>4</sup>J<sub>4/2</sub> = 2.4 Hz, H-4), 6.44–6.47 (m, 2H, H-10, H-12), 5.52 (d, 1H, <sup>3</sup>J<sub>14/7</sub> = 6.8 Hz, H-14), 4.26 (dd, 1H, <sup>2</sup>J<sub>6a/6b</sub> = 11.1 Hz, <sup>3</sup>J<sub>6a/7</sub> = 5.1 Hz, H-6a), 3.80 (s, 3H, H-16/H-17), 3.78 (s, 3H, H-16/H-17), 3.65 (t, 1H, <sup>2</sup>J<sub>6b/6a</sub> = <sup>3</sup>J<sub>6b/7</sub> = 10.5 Hz, H-6b), 3.55 (ddd, <sup>3</sup>J<sub>7/6b</sub> = 11.2 Hz, <sup>3</sup>J<sub>7/14</sub> = 6.5 Hz, <sup>3</sup>J<sub>7/6a</sub> = 5.1 Hz, H-7) ppm; <sup>13</sup>C NMR (151 MHz, CDCl<sub>3</sub>): δ 161.13 (C<sub>q</sub>, C-3/C-11/C-13), 161.03 (C<sub>q</sub>, C-3/C-11/C-13), 160.72 (C<sub>q</sub>, C-3/C-11/C-13), 156.61 (C<sub>q</sub>, C-5), 131.82 (CH, C-1), 124.71 (CH, C-9), 119.12 (C<sub>q</sub>, C-8), 112.34 (C<sub>q</sub>, C-15), 109.16 (CH, C-2), 106.35 (CH, C-10), 101.62 (CH, C-4), 96.90 (CH, C-12), 78.57 (CH-14), 66.58 (CH<sub>2</sub>, C-6), 55.49 (CH<sub>3</sub>, C-16/C-17), 55.37 (CH<sub>3</sub>, C-16/C-17), 39.54 (CH, C-7) ppm; IR (ATR): 2904, 1620, 1494, 1158,

1116, 1027, 837, 798, 635  $\text{cm}^{-1}$ ; GC-MS (EI):  $m/z = 284$   $[\text{M}]^+$ ; analysis (calcd., found for  $\text{C}_{17}\text{H}_{16}\text{O}_4$ ): C (71.82, 72.09), H (5.67, 5.75).

## Supplementary Note 12

### First-Generation Synthesis: Preparation of Variabilin (3) and Isosativanone (21)

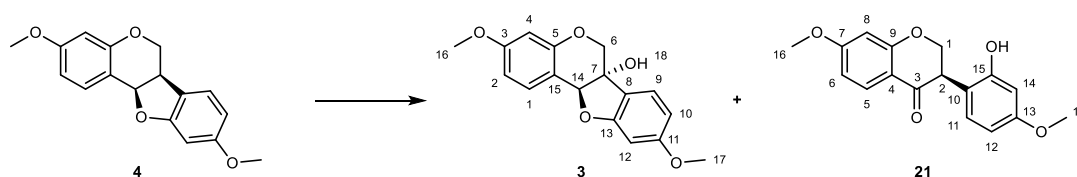

Homopterothecan (**4**, 97.5 mg, 0.34 mmol, 1.0 equiv.), *N*-hydroxyphthalimide (55.9 mg, 0.34 mmol, 1.0 equiv.) and cobalt(II) acetate (30.4 mg, 0.17 mmol, 0.5 equiv.) were stirred in MeCN (6.9 mL) in a 20 mL test tube with ground joint at room temperature for 2 h under argon atmosphere. The reaction mixture was cooled to 0 °C and stirred for 24 h under oxygen atmosphere (balloon). The oxygen atmosphere was replaced by argon,  $\text{PPh}_3$  (134.9 mg, 0.51 mmol, 1.5 equiv.) was added, and the reaction was stirred for 20 min at room temperature. Saturated aqueous  $\text{NH}_4\text{Cl}$  solution was added, and the aqueous layer was extracted three times with EtOAc. The combined organic layers were dried over  $\text{MgSO}_4$ , the solvents were removed in vacuo, and the residue was purified by flash chromatography (DCM:EtOAc 10:1 *v/v*) to afford a mixture of **3** and **21**. The mixture was separated by preparative HPLC (DCM:EtOAc 15:1 *v/v*) to afford variabilin (**3**, 65.9 mg, 64%, >99% *ee*) as a semi-crystalline opaque gum and isosativanone (**21**, 10.3 mg, 10%, 91% *ee*) as a yellowish solid.

Variabilin (**3**): mp: 115–116 °C; TLC (DCM:EtOAc 15:1 *v/v*):  $R_f = 0.33$ ;  $[\alpha]_{\text{D}}^{20} = -284.8$  (*c* 0.8  $\text{CHCl}_3$ ) (lit.<sup>7</sup>  $[\alpha]_{\text{D}}^{25} = -220.8$  (*c* 0.68  $\text{CHCl}_3$ ));  $^1\text{H NMR}$  (600 MHz,  $\text{CDCl}_3$ ):  $\delta$  7.41 (d, 1H,  $^3J_{1/2} = 8.7$  Hz, H-1), 7.27 (d, 1H,  $^3J_{9/10} = 8.3$  Hz, H-9), 6.67 (dd, 1H,  $^3J_{2/1} = 8.6$  Hz,  $^4J_{2/4} = 2.5$  Hz, H-2), 6.54 (dd, 1H,  $^3J_{10/9} = 8.4$  Hz,  $^4J_{10/12} = 2.2$  Hz, H-10), 6.46 (d, 1H,  $^4J_{4/2} = 2.6$  Hz, H-4),

6.42 (d, 1H,  $^4J_{12/10} = 2.3$  Hz, H-12), 5.32 (s, 1H, H-14), 4.22 (dd, 1H,  $^2J_{6a/6b} = 11.6$  Hz,  $^4J_{6a/14} = 0.8$  Hz, H-6a), 4.03 (d, 1H,  $^2J_{6b/6a} = 11.5$  Hz, H-6b), 3.78 (s, 3H, H-16/H-17), 3.77 (s, 3H, H-17/H-16), 2.42 (s, 1H, OH-7) ppm;  $^{13}\text{C}$  NMR (151 MHz,  $\text{CDCl}_3$ ):  $\delta$  162.53 ( $\text{C}_q$ , C-11), 161.05 ( $\text{C}_q$ , C-3), 160.88 ( $\text{C}_q$ , C-13), 155.76 ( $\text{C}_q$ , C-5), 131.86 (CH, C-1), 123.82 (CH, C-9), 120.04 ( $\text{C}_q$ , C-8), 112.36 ( $\text{C}_q$ , C-15), 109.79 (CH, C-2), 107.68 (CH, C-10), 101.64 (CH, C-4), 97.06 (CH, C-12), 84.91 (CH, C-14), 76.74 ( $\text{C}_q$ , C-7), 69.68 ( $\text{CH}_2$ , C-6), 55.52 ( $\text{CH}_3$ , C-16/C-17), 55.37 ( $\text{CH}_3$ , C-17/16) ppm; IR (ATR): 3440, 2920, 1620, 1497, 1270, 1129, 1030, 958, 830  $\text{cm}^{-1}$ ; GC-MS (EI):  $m/z = 300$   $[\text{M}]^+$ .

Isosativanone **21**: mp: 120–123 °C; TLC (DCM:EtOAc 15:1  $v/v$ ):  $R_f = 0.33$ ;  $[\alpha]_D^{20} = +333.5$  ( $c$  0.23  $\text{CHCl}_3$ );  $^1\text{H}$  NMR (600 MHz,  $\text{CDCl}_3$ ):  $\delta$  8.42 (s, 1H, OH-15), 7.85 (d, 1H,  $^3J_{5/6} = 9.0$  Hz, H-5), 7.44 (d, 1H,  $^3J_{11/12} = 8.7$  Hz, H-11), 6.60 (dd, 1H,  $^3J_{6/5} = 8.8$  Hz,  $^4J_{6/8} = 1.7$  Hz, H-6), 6.55 (d, 1H,  $^4J_{14/12} = 2.3$  Hz, H-14), 6.48 (dd, 1H,  $^3J_{12/11} = 8.7$  Hz,  $^4J_{12/14} = 2.3$  Hz, H-12), 6.45 (d, 1H,  $^4J_{8/6} = 2.3$  Hz, H-8), 4.98 (dd, 1H,  $^2J_{1a/1b} = 12.0$  Hz,  $^3J_{1a/2} = 2.3$  Hz, H-1a), 4.83 (dd, 1H,  $^2J_{1b/1a} = 12.0$  Hz,  $^3J_{1b/2} = 4.5$  Hz, H-1b), 3.93 (dd, 1H,  $^3J_{2/1b} = 4.5$  Hz,  $^3J_{2/1a} = 2.3$  Hz, H-2), 3.86 (s, 3H, H-16), 3.76 (s, 3H, H-17) ppm;  $^{13}\text{C}$  NMR (151 MHz,  $\text{CDCl}_3$ ):  $\delta$  192.90 ( $\text{C}_q$ , C-3), 167.07 ( $\text{C}_q$ , C-7), 163.80 ( $\text{C}_q$ , C-9), 160.73 ( $\text{C}_q$ , C-13), 156.71 ( $\text{C}_q$ , C-15), 129.95 (CH, C-5), 127.24 (CH, C-11), 115.06 ( $\text{C}_q$ , C-10), 112.56 ( $\text{C}_q$ , C-4), 110.89 (CH, C-6), 107.18 (CH, C-12), 103.44 (CH, C-14), 100.56 (CH, C-8), 69.92 ( $\text{CH}_2$ , C-1), 55.74 ( $\text{CH}_3$ , C-16), 55.29 ( $\text{CH}_3$ , C-17), 45.43 (CH, C-2) ppm; IR (ATR): 3329, 1596, 1437, 1240, 1199, 1160, 1103, 1016, 823  $\text{cm}^{-1}$ ; MS (ESI):  $m/z = 301.1$   $[\text{M}+\text{H}]^+$ ; analysis (calcd., found for  $\text{C}_{17}\text{H}_{16}\text{O}_5$ ): C (67.99, 67.78), H (5.37, 5.35).

## Supplementary Note 13

### Second-Generation Synthesis: One-pot Transformation from 2'-Hydroxydaidzein (**23**) to 3,9-Dihydroxypterocarpan (**6**)

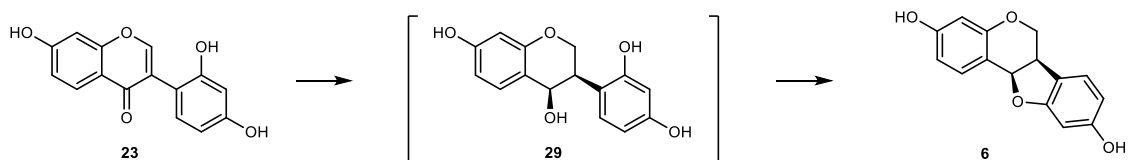

Preparation of the catalyst solution:

[Ru(*p*-cym)Cl<sub>2</sub>]<sub>2</sub> (22.6 mg, 36.9 μmol) and (*R,R*)-TsDPEN (30.4 mg, 81.2 μmol) were dissolved in DMSO (0.44 mL) in a 5 mL round-bottomed flask. Another flask containing triethylamine (1.8 mL) was cooled to 0 °C, and formic acid (0.6 mL) was added. The mixture was stirred vigorously for 5 min at room temperature. An aliquot of this mixture (1.2 mL) was added to the ruthenium catalyst, and the resulting solution was stirred for another 3 min.

Reaction:

In a 5 mL round-bottomed flask isoflavone **23** (271.3 mg, 1.00 mmol, 1.0 equiv., for preparation, see Supplementary Note 16) was dissolved in DMSO (1.25 mL), and water (0.18 mL, 10.4 mmol, 10 equiv.) and an aliquot of the catalyst solution (1.1 mL, ca. 5 mol% catalyst) were added. The reaction mixture was stirred at 45 °C for 19.5 h, cooled to room temperature, and hydrochloric acid (37%, 0.52 mL, 6.24 mmol, 6.2 equiv.) was added. The mixture was stirred for 10 min. The reaction was quenched by addition of saturated aqueous NH<sub>4</sub>Cl solution, and the mixture was extracted three times with EtOAc. The combined organic layers were dried over MgSO<sub>4</sub>, the solvents were removed in vacuo, and the residue was purified by flash chromatography (DCM:EtOAc 3:1 *v/v*) to afford pterocarpan **6** (187.8 mg, 73%, 99% *ee*) as a white solid foam.

3,9-Dihydroxypterocarpan (**6**): mp: 171–172 °C (lit.<sup>8</sup> 166–168 °C); TLC (DCM:EtOAc 1:1 *v/v*): R<sub>f</sub> = 0.64; [α]<sub>D</sub><sup>20</sup> = –240.8 (*c* 0.47 acetone); <sup>1</sup>H NMR (500 MHz, acetone-*d*<sub>6</sub>): δ 8.56 (s,

1H), 8.33 (s, 1 H), 7.32 (d,  $J = 8.4$  Hz, 1H), 7.13 (d,  $J = 8.0$  Hz, 2H), 6.55 (dd,  $J = 8.4$ ,  $J = 2.4$  Hz, 1H), 6.33–6.40 (m, 2H), 6.28 (d,  $J = 2.0$  Hz, 1H), 5.47 (d,  $J = 6.0$  Hz, 1H), 4.20–4.29 (m, 1H), 3.50–3.59 (m, 2H) ppm;  $^{13}\text{C}$  NMR (126 MHz, acetone- $d_6$ ):  $\delta$  161.84 (C<sub>q</sub>), 159.72 (C<sub>q</sub>), 159.63 (C<sub>q</sub>), 157.78 (C<sub>q</sub>), 133.19 (CH), 125.99 (CH), 119.30 (C<sub>q</sub>), 112.97 (C<sub>q</sub>), 110.51 (CH), 108.34 (CH), 103.98 (CH), 98.60 (CH), 79.34 (CH), 67.26 (CH<sub>2</sub>), 40.39 (CH) ppm; IR (ATR): 3335, 1625, 1496, 1291, 1149, 1111, 956, 828, 792, 627  $\text{cm}^{-1}$ ; MS (ESI):  $m/z = 257.3$  [M+H]<sup>+</sup>; analysis (calcd., found for C<sub>15</sub>H<sub>12</sub>O<sub>4</sub>): C (70.31, 70.33), H (4.72, 4.76).

Without addition of hydrochloric acid to the reaction mixture, the intermediate isoflavanol **29** may be isolated as an off-white solid (70% yield).

2',4',7-Trihydroxyisoflavan-4-ol (**29**): mp: 161–162 °C; TLC (DCM:EtOAc 1:1 v/v): R<sub>f</sub> = 0.32;  $[\alpha]_{\text{D}}^{20} = +137.9$  ( $c$  0.89 acetone);  $^1\text{H}$  NMR (600 MHz, acetone- $d_6$ ):  $\delta$  8.74 (s, 1H), 8.30 (s, 1H), 8.09 (s, 1H), 7.07 (d,  $J = 8.3$  Hz, 1H), 7.01 (d,  $J = 8.3$  Hz, 1H), 6.38–6.41 (m, 2H), 6.31 (dd,  $J = 8.3$  Hz,  $J = 2.6$  Hz, 1H), 6.29 (d,  $J = 2.3$  Hz, 1H), 4.80 (br. t,  $J = 3.0$  Hz, 1H), 4.60 (dd,  $J = 12.4$  Hz,  $J = 10.2$  Hz, 1H), 4.50 (d,  $J = 4.1$  Hz, 1H), 4.09 (ddd,  $J = 10.2$  Hz,  $J = 3.6$  Hz,  $J = 1.3$  Hz, 1H), 3.44 (dt,  $J = 12.2$  Hz,  $J = 3.1$  Hz, 1H) ppm;  $^{13}\text{C}$  NMR (151 MHz, acetone- $d_6$ ):  $\delta$  159.37 (C<sub>q</sub>), 158.32 (C<sub>q</sub>), 157.34 (C<sub>q</sub>), 156.16 (C<sub>q</sub>), 132.35 (CH), 131.46 (CH), 118.22 (C<sub>q</sub>), 117.27 (C<sub>q</sub>), 108.86 (CH), 107.66 (CH), 104.15 (CH), 103.50 (CH), 66.96 (CH), 64.91 (CH<sub>2</sub>), 40.74 (CH) ppm; IR (ATR): 3478, 3364, 1600, 1163, 1113, 1033, 843, 798, 629  $\text{cm}^{-1}$ ; MS (ESI):  $m/z = 272.7$  [M–H]<sup>–</sup>; analysis (calcd., found for C<sub>15</sub>H<sub>14</sub>O<sub>5</sub>): C (65.69, 65.75), H (5.15, 5.11).

## Supplementary Note 14

### Second-Generation Synthesis: Preparation of Homoptercarpin (**4**) from Pterocarpan **6**

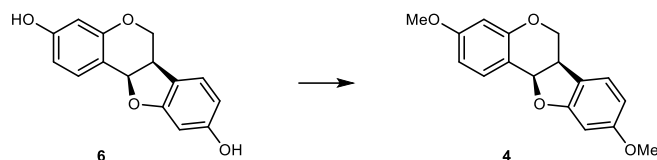

Pterocarpan **6** (82.7 mg, 0.32 mmol, 1.0 equiv.) was dissolved in DMF (1.6 mL) in a 10 mL round-bottomed flask and cooled to 0 °C. Potassium carbonate (178.5 mg, 1.29 mmol, 4.0 equiv.) and iodomethane (0.08 mL, 1.29 mmol, 4.0 equiv.) were added successively, and the reaction mixture was stirred at room temperature for 4 h. 2 N hydrochloric acid (1.5 mL), water, and EtOAc were added successively. The aqueous layer was extracted twice with EtOAc, the combined organic layers were dried over MgSO<sub>4</sub>, the solvents were removed in vacuo, and the residue was purified by flash chromatography (DCM:EtOAc 15:1 *v/v*) to afford pterocarpin **4** (89.1 mg, 97%, 99% *ee*) as a white solid.

For analytical data, see Supplementary Note 11; for oxidation to variabilin (**3**), see Supplementary Note 12.

## Supplementary Note 15

### Synthesis of **1** and **2**: Preparation of 7-Hydroxy-2',4'-dimethoxyisoflavone (**22**)

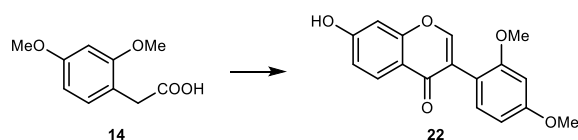

(2,4-Dimethoxyphenyl)acetic acid (**14**, 1.962 g, 10.0 mmol) and resorcinol (1.652 mmol, 15.0 mmol, 1.5 equiv.) were suspended in boron trifluoride diethyl etherate (7.4 mL, 60.0 mmol, 6.0 equiv.) in a 50 mL round-bottomed flask and stirred at 65 °C for 5 h. The reaction mixture was cooled in an ice-bath, and DMF (15.4 mL) was added carefully. The mixture was stirred at

room temperature for 15 min. The rubber septum was removed, and the open reaction flask was heated to 50 °C. At this temperature, mesyl chloride (2.3 mL, 30.0 mmol, 3.0 equiv.) in DMF (4.0 mL) was added over 15 min, and the resulting solution was heated to 75 °C for 17.5 h. The reaction was cooled to room temperature, poured into sodium acetate solution (200 mL, 12 g NaOAc/100 mL), and stirred for 1.5 h. The red solid was collected and refluxed in chloroform:ethanol 1:1 v/v (30 mL) for 40 min. After cooling to room temperature, the solid was collected by filtration and dried in vacuo to afford isoflavone **22** (1.912 g, 64%) as an off-white to orange solid.

mp: 260–272 °C (lit.<sup>9</sup> 265–270 °C); TLC (DCM:EtOAc 4:1 v/v):  $R_f$  = 0.28; <sup>1</sup>H NMR (300 MHz, DMSO-*d*<sub>6</sub>):  $\delta$  10.75 (s, 1H), 8.12 (s, 1H), 7.91 (d,  $J$  = 8.7 Hz, 1H), 7.13 (d,  $J$  = 8.3 Hz, 1H), 6.92 (dd,  $J$  = 8.8 Hz,  $J$  = 2.2 Hz, 1H), 6.86 (d,  $J$  = 2.1 Hz, 1H), 6.63 (d,  $J$  = 2.1 Hz, 1H), 6.56 (dd,  $J$  = 8.3 Hz,  $J$  = 2.3 Hz, 1H), 3.80 (s, 3H), 3.70 (s, 3H) ppm; <sup>13</sup>C NMR (75 MHz, DMSO-*d*<sub>6</sub>):  $\delta$  174.38 (C<sub>q</sub>), 162.42 (C<sub>q</sub>), 160.66 (C<sub>q</sub>), 158.42 (C<sub>q</sub>), 157.50 (C<sub>q</sub>), 153.88 (CH), 132.03 (CH), 127.17 (CH), 121.60 (C<sub>q</sub>), 116.55 (C<sub>q</sub>), 115.02 (CH), 113.50 (C<sub>q</sub>), 104.57 (CH), 102.13 (CH), 98.58 (CH), 55.53 (CH<sub>3</sub>), 55.27 (CH<sub>3</sub>) ppm; IR (ATR): 3191, 1572, 1236, 1157, 1031, 745 cm<sup>-1</sup>; GC-MS (EI):  $m/z$  = 298.1 [M]<sup>+</sup>; analysis (calcd., found for C<sub>17</sub>H<sub>14</sub>O<sub>5</sub>): C (68.45, 68.57), H (4.73, 4.85).

## Supplementary Note 16

### Synthesis of **1** and **2**: Preparation of 2',4',7-Trihydroxyisoflavone **23**

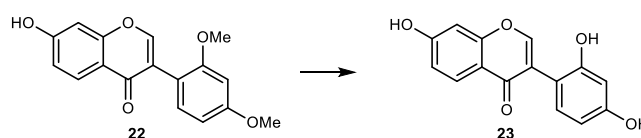

Isoflavone **22** (2.305 g, 7.73 mmol) was suspended in DCM (62 mL) in a 100 mL round-bottomed flask and cooled to 0 °C. Boron tribromide (3.7 mL, 38.6 mmol, 5.0 equiv.) was added

within 1 min and the reaction was stirred for 3 h at 0 °C. The reaction was quenched carefully with methanol (10 mL) and transferred to a separatory funnel with water and EtOAc. The mixture was extracted six times with EtOAc, and the solvents were removed in vacuo. The residue was suspended in DMF (6 mL), and 2N aqueous hydrochloric acid (70 mL) was added. The precipitate was collected by filtration and dried at 105 °C overnight to afford isoflavone **23** (1.943 g, 93%) as a slightly pinkish solid. Instead of the aqueous workup, the solvents can be removed in vacuo after addition of methanol, and the product can be precipitated from DMF with 2N aqueous hydrochloric acid, too.

mp: 282–284 °C (lit.<sup>10</sup> 284 °C); TLC (isohexane:EtOAc 2:3 v/v):  $R_f = 0.25$ ; <sup>1</sup>H NMR (300 MHz, DMSO-*d*<sub>6</sub>):  $\delta$  10.75 (s, 1H), 9.32 (s, 1H), 9.23 (s, 1H), 8.14 (s, 1H), 7.93 (d,  $J = 8.7$  Hz, 1H), 6.97 (d,  $J = 8.3$  Hz, 1H), 6.93 (dd,  $J = 8.8$  Hz,  $J = 2.2$  Hz, 1H), 6.86 (d,  $J = 2.3$  Hz, 1H), 6.35 (d,  $J = 2.3$  Hz, 1H), 6.26 (dd,  $J = 8.3$  Hz,  $J = 2.3$  Hz, 1H) ppm; <sup>13</sup>C NMR (75 MHz, DMSO-*d*<sub>6</sub>):  $\delta$  175.15 (C<sub>q</sub>), 162.43 (C<sub>q</sub>), 158.36 (C<sub>q</sub>), 157.43 (C<sub>q</sub>), 156.37 (C<sub>q</sub>), 154.32 (CH), 132.08 (CH), 127.20 (CH), 121.78 (C<sub>q</sub>), 116.57 (C<sub>q</sub>), 115.04 (CH), 110.11 (C<sub>q</sub>), 106.26 (CH), 102.84 (CH), 102.05 (CH) ppm; IR (ATR): 3416, 3060, 1613, 1381, 1268, 1160, 1121, 846, 796, 629 cm<sup>-1</sup>; MS (ESI):  $m/z = 271.0$  [M+H]<sup>+</sup>; analysis (calcd., found for C<sub>15</sub>H<sub>10</sub>O<sub>5</sub>): C (66.67, 66.37), H (3.73, 3.79).

## Supplementary Note 17

### Synthesis of **1** and **2**: Preparation of ATH-Precursor **13** by Chemoselective Propargylation

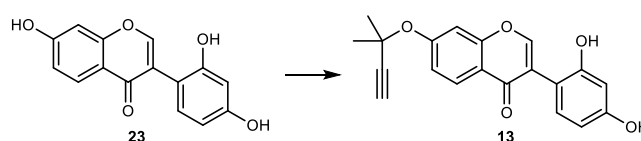



Isoflavone **23** (405.4 mg, 1.50 mmol), copper(I) iodide (28.6 mg, 0.15 mmol, 0.1 equiv.), potassium carbonate (228.0 mg, 1.65 mmol, 1.1 equiv.) and potassium iodide (298.8 mg, 1.8 mmol, 1.2 equiv.) were suspended in DMF (5.0 mL). 3-Chloro-3-methylbut-1-yne (0.20 mL, 1.8 mmol, 1.2 equiv.) was added dropwise, and the resulting reaction mixture was stirred for 17.5 h at room temperature. The reaction was quenched by addition of 1 N aqueous hydrochloric acid. The mixture was extracted three times with EtOAc, the combined organic layers were dried over MgSO<sub>4</sub>, and the solvents were removed in vacuo. The residue was purified by flash chromatography (EtOAc:isohexane 1:1 v/v) to afford isoflavone **13** (419.1 mg, 83%) as a white to yellowish solid.

mp: 152–154 °C; TLC (isohexane:EtOAc 1:1 v/v): R<sub>f</sub> = 0.43; <sup>1</sup>H NMR (300 MHz, acetone-*d*<sub>6</sub>): δ 9.02 (s, 1H), 8.45 (s, 1H), 8.33 (s, 1H), 8.18 (d, *J* = 8.9 Hz, 1H), 7.51 (d, *J* = 2.3 Hz, 1H), 7.30 (dd, *J* = 9.0 Hz, *J* = 2.4 Hz, 1H), 7.16 (d, *J* = 8.1 Hz, 1H), 6.42–6.50 (m, 2H), 3.41 (s, 1H), 1.78 (s, 6H) ppm; <sup>13</sup>C NMR (75 MHz, acetone-*d*<sub>6</sub>): δ 178.70 (C<sub>q</sub>), 161.83 (C<sub>q</sub>), 160.46 (C<sub>q</sub>), 158.69 (C<sub>q</sub>), 158.04 (C<sub>q</sub>), 156.53 (CH), 132.30 (CH), 127.87 (CH), 124.84 (C<sub>q</sub>), 119.85 (CH), 118.91 (C<sub>q</sub>), 112.60 (C<sub>q</sub>), 108.70 (CH), 106.89 (CH), 105.83 (CH), 85.39 (C<sub>q</sub>), 77.57 (CH), 74.09 (C<sub>q</sub>), 29.83 (CH<sub>3</sub>) ppm; IR (ATR): 3262, 1917, 1592, 1433, 1116, 883, 698 cm<sup>-1</sup>; MS (ESI): *m/z* = 337.2 [M+H]<sup>+</sup>; analysis (calcd., found for C<sub>20</sub>H<sub>16</sub>O<sub>5</sub>): C (71.42, 71.43), H (4.80, 4.65).

## Supplementary Note 18

### Synthesis of **1** and **2**: Preparation of Isoflavone **13** *via* Suzuki Coupling

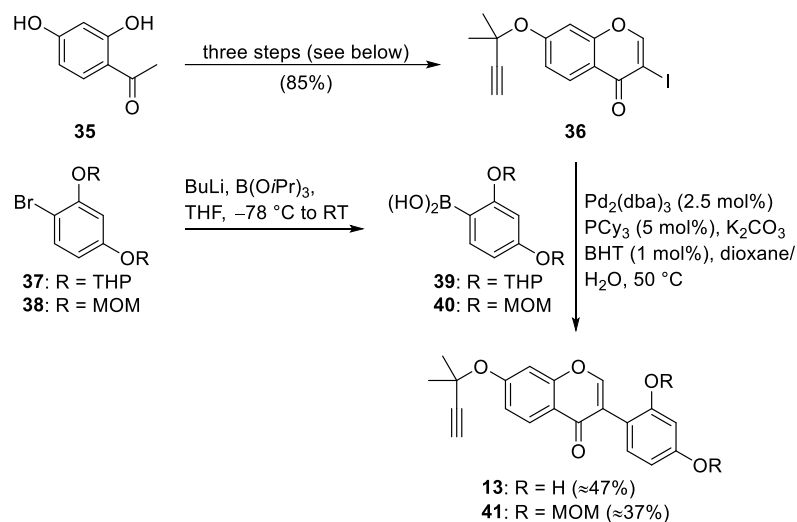

Iodochromone **36** was synthesized over three steps from acetophenone **35** in a procedure adapted from Gammill,<sup>11</sup> and the boronic acids **39** and **40** were obtained from the reported 4-bromoresorcinol derivatives **37** and **38**.<sup>12,13</sup> Unfortunately, purification of the products **13** (after acidic work-up) and **41** of the Suzuki coupling proved to be very difficult, and the yields were poor. Therefore, deprotection of **41** was not even attempted.

### Improved Procedure for the Propargylation of Acetophenone **35**

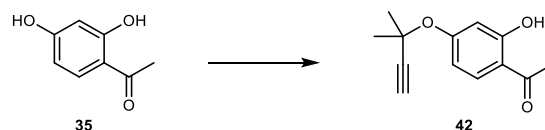

A 100 mL round-bottomed flask was charged with 2',4'-dihydroxyacetophenone (**35**, 2.844 g, 18.7 mmol), copper(I) iodide (356.0 mg, 1.87 mmol, 0.1 equiv.), potassium carbonate (7.492 g, 54.2 mmol, 2.9 equiv.) and potassium iodide (9.309 g, 56.1 mmol, 3.0 equiv.) and acetone (62 mL) was added. 3-Chloro-3-methylbut-1-yne (4.4 mL, 39.3 mmol, 2.1 equiv.) was added dropwise at room temperature. The resulting mixture was stirred for 1 h at room temperature.

The reaction was quenched by addition of 2N aqueous hydrochloric acid. The mixture was extracted three times with EtOAc, the combined organic layers were dried over MgSO<sub>4</sub>, and the solvents were removed in vacuo. The residue was purified by flash chromatography (isohexane:EtOAc 4:1 v/v) to afford acetophenone **42** (3.916 g, 96%) as a white solid.

mp: 59–61 °C; TLC (isohexane:EtOAc 4:1 v/v): R<sub>f</sub> = 0.57; <sup>1</sup>H NMR (300 MHz, CDCl<sub>3</sub>): δ 12.61 (s, 1H), 7.64 (d, *J* = 8.9 Hz, 1H), 6.90 (d, *J* = 2.5 Hz, 1H), 6.67 (dd, *J* = 8.9 Hz, *J* = 2.5 Hz, 1H), 2.67 (s, 1H), 2.57 (s, 3H), 1.73 (s, 6H) ppm; <sup>13</sup>C NMR (126 MHz, CDCl<sub>3</sub>): δ 202.75 (C<sub>q</sub>), 164.32 (C<sub>q</sub>), 162.59 (C<sub>q</sub>), 131.78 (CH), 114.47 (C<sub>q</sub>), 111.01 (CH), 106.44 (CH), 84.67 (C<sub>q</sub>), 75.07 (CH), 72.32 (C<sub>q</sub>), 29.52 (CH<sub>3</sub>), 26.26 (CH<sub>3</sub>) ppm; IR (ATR): 3262, 1611, 1365, 1235, 794, 717 cm<sup>-1</sup>; MS (ESI): *m/z* = 219.1 [M+H]<sup>+</sup>; analysis (calcd., found for C<sub>13</sub>H<sub>14</sub>O<sub>3</sub>): C (71.54, 71.25), H (6.47, 6.42).

### Preparation of Enamine **43**

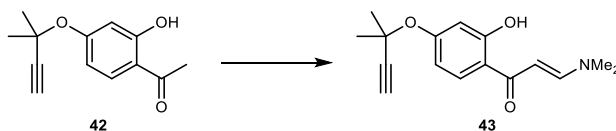

In a 10 mL round-bottomed flask acetophenone **42** (1.772 g, 8.12 mmol) was dissolved in *N,N*-dimethylformamide dimethyl acetal (4.3 mL, 32.5 mmol, 4.0 equiv.) and heated to 65 °C for 2.5 h and afterwards to 75 °C for 30 min. The reaction mixture was cooled to room temperature and poured onto water. The aqueous layer was extracted once with EtOAc and twice with DCM, the combined organic layers were dried over MgSO<sub>4</sub>, and the solvents were removed in vacuo. The residue was purified by flash chromatography (EtOAc:isohexane 2:1 v/v) to afford enamine **43** (2.003 g, 90%) as a bright yellow solid.

mp: 133–134 °C; TLC (EtOAc:isohexane 2:1 v/v): R<sub>f</sub> = 0.46; <sup>1</sup>H NMR (500 MHz, CDCl<sub>3</sub>): δ 14.29 (s, 1H), 7.85 (d, *J* = 12.0 Hz, 1H), 7.61 (d, *J* = 9.1 Hz, 1H), 6.88 (d, *J* = 2.2 Hz, 1H), 6.60

(dd,  $J = 8.8$  Hz,  $J = 2.5$  Hz, 1H), 5.70 (d,  $J = 12.3$  Hz, 1H), 3.18 (br. s., 3H), 2.96 (br. s., 3H), 2.63 (s, 1H), 1.70 (s, 6H) ppm;  $^{13}\text{C}$  NMR (126 MHz,  $\text{CDCl}_3$ ):  $\delta$  190.74 ( $\text{C}_q$ ), 164.59 ( $\text{C}_q$ ), 160.65 ( $\text{C}_q$ ), 154.08 (CH), 129.12 (CH), 114.87 ( $\text{C}_q$ ), 110.45 (CH), 107.37 (CH), 89.92 (CH), 85.28 ( $\text{C}_q$ ), 74.51 (CH), 72.03 ( $\text{C}_q$ ), 45.28 ( $\text{CH}_3$ , very weak), 37.28 ( $\text{CH}_3$ , very weak), 29.57 ( $\text{CH}_3$ ) ppm; IR (ATR): 3220, 1627, 1131, 1110, 843, 774  $\text{cm}^{-1}$ ; MS (ESI):  $m/z = 274.1$   $[\text{M}+\text{H}]^+$ ; analysis (calcd., found for  $\text{C}_{16}\text{H}_{19}\text{NO}_3$ ): C (70.31, 70.36), H (7.01, 7.23), N (5.21, 5.10).

### Preparation of Iodide **36**

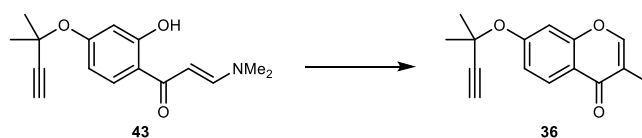

In a 50 mL round-bottomed flask enamine **43** (2.000 g, 7.32 mmol) was dissolved in chloroform (14.6 mL), and pyridine (0.89 mL, 11.0 mmol, 1.5 equiv.) and iodine (3.714 g, 14.6 mmol, 2.0 equiv.) were added successively. The reaction mixture was stirred for 1 h at room temperature, and then quenched with saturated aqueous sodium thiosulfate solution (23 mL). The mixture was stirred for 5 min and diluted with water. The aqueous layer was extracted three times with DCM, the combined organic layers were dried over  $\text{MgSO}_4$ , and the solvents were removed in vacuo. The residue was purified by flash chromatography (isohexane:EtOAc 4:1  $v/v$ ) to afford iodide **36** (2.583 g, 98%) as a yellowish solid.

mp: 86–105 °C; TLC (isohexane:EtOAc 4:1  $v/v$ ):  $R_f = 0.42$ ;  $^1\text{H}$  NMR (500 MHz,  $\text{CDCl}_3$ ):  $\delta$  8.23 (s, 1H), 8.14 (d,  $J = 9.1$  Hz, 1H), 7.35 (d,  $J = 2.5$  Hz, 1H), 7.20 (dd,  $J = 9.0$  Hz,  $J = 2.4$  Hz, 1H), 2.70 (s, 1H), 1.75 (s, 6H) ppm;  $^{13}\text{C}$  NMR (126 MHz,  $\text{CDCl}_3$ ):  $\delta$  172.69 ( $\text{C}_q$ ), 160.62 ( $\text{C}_q$ ), 157.31 (CH), 157.17 ( $\text{C}_q$ ), 127.53 (CH), 118.94 (CH), 116.31 ( $\text{C}_q$ ), 105.92 (CH), 87.01 ( $\text{C}_q$ ), 84.43 ( $\text{C}_q$ ), 75.48 (CH), 72.91 ( $\text{C}_q$ ), 29.43 ( $\text{CH}_3$ ) ppm; IR (ATR): 3246, 1613, 1134, 1059, 863,

683  $\text{cm}^{-1}$ ; MS (ESI):  $m/z = 355.0$   $[\text{M}+\text{H}]^+$ ; analysis (calcd., found for  $\text{C}_{14}\text{H}_{11}\text{IO}_3$ ): C (47.48, 47.32), H (3.13, 3.12).

### Preparation of THP Protected 4-Bromoresorcinol **37**

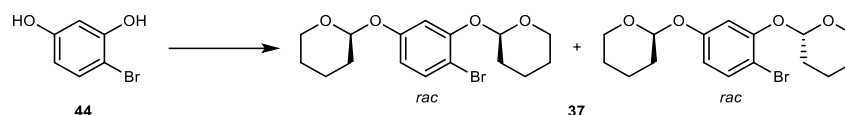

In a 25 mL round-bottomed flask 4-bromoresorcinol (**44**, 1.674 g, 8.59 mmol) was dissolved in DCM (8.6 mL) and 3,4-dihydro-2*H*-pyran (4.7 mL, 51.6 mmol, 6.0 equiv.) and pyridinium *p*-toluenesulfonate (215.9 mg, 0.86 mmol, 0.1 equiv.) was added. The reaction mixture was stirred for 85 min at room temperature and subsequently poured onto 2N aqueous sodium hydroxide. The aqueous layer was extracted three times with DCM, the combined organic layers were dried over  $\text{MgSO}_4$ , and the solvents were removed in vacuo. The residue was purified by flash chromatography (isohexane:EtOAc 4:1 *v/v*) to afford bromobenzene **37** (2.995 g, 98%) as a white solid (diastereomeric mixture 1:1).

mp: 60–61 °C (lit.<sup>12</sup> 68–69 °C); TLC (isohexane:EtOAc 4:1 *v/v*):  $R_f = 0.54$ ;  $^1\text{H}$  NMR (600 MHz,  $\text{CDCl}_3$ ):  $\delta$  7.40 (d,  $J = 8.7$  Hz, 1H), 7.39 (d,  $J = 8.8$  Hz, 1H), 6.90 (d,  $J = 2.6$  Hz, 1H), 6.89 (d,  $J = 2.6$  Hz, 1H), 6.64 (dd,  $J = 8.7$  Hz,  $J = 2.6$  Hz, 1H), 6.62 (dd,  $J = 8.8$  Hz,  $J = 2.5$  Hz, 1H), 5.51 (t,  $J = 2.9$  Hz, 1H), 5.49 (t,  $J = 2.9$  Hz, 1H), 5.40 (t,  $J = 3.2$  Hz, 1H), 5.36 (t,  $J = 3.2$  Hz, 1H), 3.85–3.96 (m, 4H), 3.57–3.66 (m, 4H), 2.06–2.15 (m, 2H), 1.93–2.03 (m, 4H), 1.81–1.90 (m, 6H), 1.56–1.77 (m, 12H) ppm;  $^{13}\text{C}$  NMR (151 MHz,  $\text{CDCl}_3$ ):  $\delta$  157.45 ( $\text{C}_q$ ), 157.31 ( $\text{C}_q$ ), 153.99 ( $\text{C}_q$ ), 153.84 ( $\text{C}_q$ ), 132.91 (CH), 110.61 (CH), 110.42 (CH), 106.24 (CH), 105.70 (CH), 104.80 ( $\text{C}_q$ ), 104.64 ( $\text{C}_q$ ), 96.82 (CH), 96.72 (CH), 96.56 (CH), 96.36 (CH), 61.99 ( $\text{CH}_2$ ), 61.91 ( $\text{CH}_2$ ), 61.78 ( $\text{CH}_2$ ), 61.74 ( $\text{CH}_2$ ), 30.24 ( $\text{CH}_2$ ), 30.19 ( $\text{CH}_2$ ), 30.14 ( $\text{CH}_2$ ), 30.11 ( $\text{CH}_2$ ), 25.20 ( $\text{CH}_2$ ), 25.11 ( $\text{CH}_2$ ), 18.64 ( $\text{CH}_2$ ), 18.56 ( $\text{CH}_2$ ), 18.27 ( $\text{CH}_2$ ), 18.24 ( $\text{CH}_2$ ) ppm; IR (ATR): 2939,

1104, 992, 871  $\text{cm}^{-1}$ ; MS (ESI):  $m/z = 379.1$   $[\text{M}+\text{H}]^+$ ; analysis (calcd., found for  $\text{C}_{16}\text{H}_{21}\text{BrO}_4$ ): C (53.79, 54.06), H (5.93, 6.06).

### Suzuki Coupling of Iodide **36** and the THP Protected Boronic Acid **39**

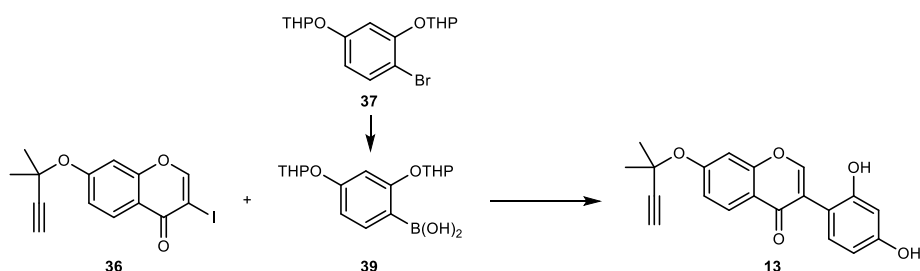

Bromobenzene **37** (964.6 mg, 2.70 mmol, 1.8 equiv.) was dissolved in THF (5.4 mL) and triisopropyl borate (1.25 mL, 5.40 mmol, 3.6 equiv.) in a 25 mL round-bottomed flask and cooled to  $-78$  °C. *n*-Butyllithium solution (3.0 mL, 1.6M in hexanes, 4.86 mmol, 3.2 equiv.) was added over 15 min, and the reaction mixture was stirred for 60 min at  $-78$  °C. The dry-ice/acetone bath was removed, and the reaction mixture was stirred for 2 h and then poured onto saturated aqueous  $\text{NH}_4\text{Cl}$  solution. The aqueous layer was extracted three times with EtOAc, the combined organic layers were dried over  $\text{MgSO}_4$ , and the solvents were removed in vacuo. To the crude boronic acid was added iodide **36** (531.2 mg, 1.50 mmol, 1.0 equiv.), potassium carbonate (622.0 mg, 4.50 mmol, 3.0 equiv.), BHT (3.3 mg, 15.0  $\mu\text{mol}$ , 1 mol%), 1,4-dioxane (6.2 mL) and water (2.6 mL). The mixture was purged with argon for 5 min. Tricyclohexylphosphine (21.0 mg, 75.0  $\mu\text{mol}$ , 5 mol%) and  $\text{Pd}_2(\text{dba})_3$  (34.3 mg, 37.5  $\mu\text{mol}$ , 2.5 mol%) were added successively, and the reaction mixture was stirred at 50 °C for 65 min. The reaction mixture was diluted with THF (6.2 mL), and concentrated hydrochloric acid (1.5 mL) was added carefully. After stirring at 50 °C for 25 min, the reaction mixture was cooled to room temperature, and water was added. The aqueous layer was extracted three times with EtOAc, the combined organic layers were dried over  $\text{MgSO}_4$ , and the solvents were removed in vacuo. The residue

was purified by repeated flash chromatography (isohexane:EtOAc 1<sup>st</sup>: 1.1; 2<sup>nd</sup>: 3:2 v/v) to afford isoflavone **13** (237.3 mg, ≈47%, impure) as a brown solid.

For analytical details see Supplementary Note 17

### Suzuki Coupling of Iodide **36** and the MOM Protected Boronic Acid **40**

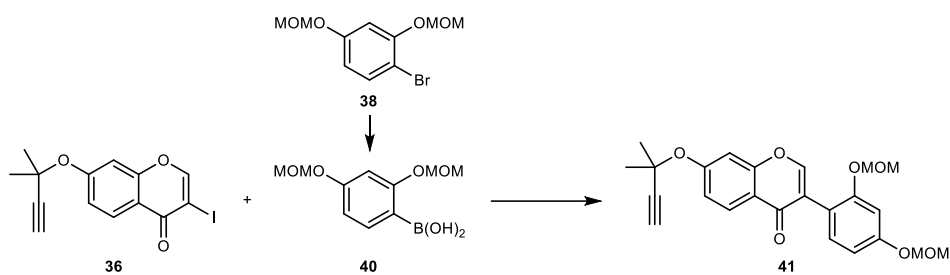

Bromobenzene **38**<sup>13</sup> (700.0 mg, 2.52 mmol, 1.8 equiv.) was dissolved in THF (5.1 mL) and triisopropyl borate (1.2 mL, 5.05 mmol, 3.6 equiv.) in a 10 mL round-bottomed flask and cooled to  $-78$  °C. *n*-Butyllithium solution (2.2 mL, 1.6M in hexanes, 3.54 mmol, 2.5 equiv.) was added over 30 min, and the reaction mixture was stirred for 15 min at  $-78$  °C. The dry-ice/acetone bath was removed, and the reaction mixture was stirred for 3.3 h and then poured onto saturated 1N aqueous hydrochloric acid. The aqueous layer was extracted three times with EtOAc, the combined organic layers were dried over MgSO<sub>4</sub>, and the solvents were removed in vacuo. To the crude boronic acid was added iodide **36** (497.0 mg, 1.40 mmol, 1.0 equiv.), potassium carbonate (581.9 mg, 4.21 mmol, 3.0 equiv.), BHT (3.1 mg, 14.0 μmol, 1 mol%), 1,4-dioxane (5.8 mL) and water (2.5 mL). The mixture was purged with argon for 5 min. Tricyclohexylphosphine (19.7 mg, 70.2 μmol, 5 mol%) and Pd<sub>2</sub>(dba)<sub>3</sub> (32.1 mg, 35.1 μmol, 2.5 mol%) were added successively, and the reaction mixture was stirred at 50 °C for 45 min. The reaction mixture was cooled to room temperature, and saturated aqueous NH<sub>4</sub>Cl solution was added. The aqueous layer was extracted three times with EtOAc, the combined organic layers were dried over MgSO<sub>4</sub>, and the solvents were removed in vacuo. The residue was purified by repeated flash chromatography (isohexane:EtOAc 1<sup>st</sup>: 1.1; 2<sup>nd</sup>: 2:1 v/v) to afford isoflavone **41**

(223.8 mg,  $\approx 37\%$ , impure) as a yellow gum. An analytical sample was obtained by preparative HPLC.

TLC (isohexane:EtOAc 2:1 v/v):  $R_f = 0.33$ ;  $^1\text{H NMR}$  (300 MHz,  $\text{CDCl}_3$ ):  $\delta$  8.18 (d,  $J = 8.9$  Hz, 1H), 7.90 (s, 1H), 7.38 (d,  $J = 2.3$  Hz, 1H), 7.23 (d,  $J = 8.3$  Hz, 1H), 7.18 (dd,  $J = 8.9$  Hz,  $J = 2.3$  Hz, 1H), 6.93 (d,  $J = 2.5$  Hz, 1H), 6.78 (dd,  $J = 8.4$  Hz,  $J = 2.4$  Hz, 1H), 5.20 (s, 2H), 5.13 (s, 2H), 3.50 (s, 3H), 3.43 (s, 3H), 2.71 (s, 1H), 1.75 (s, 6H) ppm;  $^{13}\text{C NMR}$  (75 MHz,  $\text{CDCl}_3$ ):  $\delta$  175.65 ( $\text{C}_q$ ), 160.08 ( $\text{C}_q$ ), 158.51 ( $\text{C}_q$ ), 157.19 ( $\text{C}_q$ ), 156.30 ( $\text{C}_q$ ), 153.68 (CH), 132.09 (CH), 127.17 (CH), 122.41 ( $\text{C}_q$ ), 119.16 ( $\text{C}_q$ ), 118.31 (CH), 115.45 ( $\text{C}_q$ ), 108.95 (CH), 106.47 (CH), 104.18 (CH), 95.02 ( $\text{CH}_2$ ), 94.43 ( $\text{CH}_2$ ), 84.74 ( $\text{C}_q$ ), 75.20 (CH), 72.76 ( $\text{C}_q$ ), 56.13 ( $\text{CH}_3$ ), 56.02 ( $\text{CH}_3$ ), 29.45 ( $\text{CH}_3$ ) ppm; IR (ATR): 1608, 1437, 1128, 997  $\text{cm}^{-1}$ ; MS (ESI):  $m/z = 425.3$   $[\text{M}+\text{H}]^+$ ; analysis (calcd., found for  $\text{C}_{24}\text{H}_{24}\text{O}_7$ ): C (67.91, 67.76), H (5.70, 5.52).

## Supplementary Note 19

### Synthesis of 1 and 2: Preparation of Pterocarpan 24 by ATH Cascade and Cyclisation

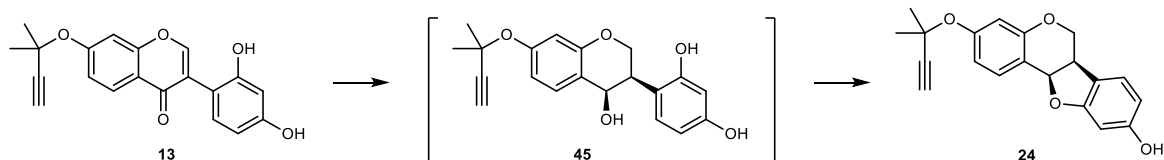

Preparation of the catalyst solution:

$[\text{Ru}(p\text{-cym})\text{Cl}_2]_2$  (3.7 mg, 6.0  $\mu\text{mol}$ ) and (*R,R*)-TsDPEN (5.0 mg, 13.3  $\mu\text{mol}$ ) were dissolved in EtOAc (0.36 mL) in a 5 mL round-bottomed flask. Another flask containing triethylamine (1.5 mL) was cooled to 0  $^\circ\text{C}$ , and formic acid (0.5 mL) was added. The mixture was stirred vigorously for 5 min at room temperature. An aliquot of this mixture (0.94 mL) was added to the ruthenium catalyst, and the resulting solution was stirred for another 5 min.

Reaction:



In a 5 mL round-bottomed flask isoflavone **13** (146.6 mg, 0.44 mmol, 1.0 equiv.) was suspended in EtOAc (0.54 mL) at 45 °C, and an aliquot of the catalyst solution (0.47 mL, ca. 1 mol% catalyst) was added. The reaction mixture was stirred at 45 °C for 19 h, cooled to room temperature and diluted with ethanol (4.4 mL). Hydrochloric acid (37%, 0.11 mL, ca. 3.0 equiv.) was added, the mixture was stirred for 13 min, and another portion of hydrochloric acid (37%, 0.11 mL, ca. 3.0 equiv.) was added. After 7 min, the reaction was quenched by addition of saturated aqueous NH<sub>4</sub>Cl solution, and the mixture was extracted three times with EtOAc. The combined organic layers were dried over MgSO<sub>4</sub>, the solvents were removed in vacuo, and the residue was purified by flash chromatography (DCM:EtOAc 2:1 v/v) to afford pterocarpan **24** (115.2 mg, 82%, >99% *ee*) as an off-white solid foam.

**Pterocarpan 24:**

mp: 27–45 °C; TLC (DCM:EtOAc 2:1 v/v): R<sub>f</sub> = 0.86; [α]<sub>D</sub><sup>25</sup> = –156.2 (c 0.97 CHCl<sub>3</sub>); <sup>1</sup>H NMR (500 MHz, CDCl<sub>3</sub>): δ 7.43 (d, *J* = 8.5 Hz, 1H), 7.09 (d, *J* = 8.8 Hz, 1H), 6.91 (dd, *J* = 8.4 Hz, *J* = 2.4 Hz, 1H), 6.89 (d, *J* = 2.2 Hz, 1H), 6.35–6.41 (m, 2H), 5.52 (d, *J* = 6.9 Hz, 1H), 5.15 (br. s., 1H), 4.25 (dd, *J* = 11.0 Hz, *J* = 4.7 Hz, 1H), 3.60–3.66 (m, 1H), 3.53 (ddd, *J* = 11.3 Hz, *J* = 6.6 Hz, *J* = 4.7 Hz, 1H), 2.60 (s, 1H), 1.67 (s, 3H), 1.66 (s, 3H) ppm; <sup>13</sup>C NMR (151 MHz, CDCl<sub>3</sub>): δ 160.65 (C<sub>q</sub>), 156.99 (C<sub>q</sub>), 156.89 (C<sub>q</sub>), 155.86 (C<sub>q</sub>), 131.21 (CH), 124.98 (CH), 119.27 (C<sub>q</sub>), 115.09 (CH), 114.14 (C<sub>q</sub>), 109.06 (CH), 107.66 (CH), 98.36 (CH), 85.71 (C<sub>q</sub>), 78.60 (CH), 74.17 (CH), 72.40 (C<sub>q</sub>), 66.56 (CH<sub>2</sub>), 39.41 (CH), 29.54 (CH<sub>3</sub>), 29.49 (CH<sub>3</sub>) ppm; IR (ATR): 3394, 3281, 1494, 1104, 1080, 957 cm<sup>-1</sup>; GC-MS (EI): *m/z* = 322.3 [M]<sup>+</sup>; analysis (calcd., found for C<sub>20</sub>H<sub>18</sub>O<sub>4</sub>): C (74.52, 74.22), H (5.63, 6.01).

The isoflavan-4-ol (+)-**45** may be isolated, too, without the addition of ethanol and hydrochloric acid by flash chromatography (DCM:EtOAc 2:1 v/v) as a white solid in 70% yield.

**Isoflavan-4-ol 45:**

mp: 145–147 °C; TLC (DCM:EtOAc 2:1 v/v):  $R_f = 0.30$ ;  $[\alpha]_D^{25} = +134.8$  (*c* 0.58 acetone);  $^1\text{H}$  NMR (300 MHz, acetone- $d_6$ ):  $\delta$  8.70 (s, 1H), 8.11 (s, 1H), 7.12–7.20 (m, 1H), 7.02 (d,  $J = 8.5$  Hz, 1H), 6.68–6.76 (m, 2H), 6.41 (d,  $J = 2.5$  Hz, 1H), 6.32 (dd,  $J = 8.3$  Hz,  $J = 2.5$  Hz, 1H), 4.79–4.88 (m, 1H), 4.62 (dd,  $J = 12.1$  Hz,  $J = 10.2$  Hz, 1H), 4.57 (d,  $J = 4.3$  Hz, 1H), 4.13 (ddd,  $J = 10.3$  Hz,  $J = 3.7$  Hz,  $J = 1.3$  Hz, 1H), 3.47 (dt,  $J = 12.3$  Hz,  $J = 3.2$  Hz, 1H), 3.17 (s, 1H), 1.62 (s, 6H) ppm;  $^{13}\text{C}$  NMR (75 MHz, acetone- $d_6$ ):  $\delta$  158.33 (C<sub>q</sub>), 157.58 (C<sub>q</sub>), 157.28 (C<sub>q</sub>), 155.53 (C<sub>q</sub>), 131.69 (CH), 131.32 (CH), 121.28 (C<sub>q</sub>), 117.05 (C<sub>q</sub>), 114.17 (CH), 109.39 (CH), 107.65 (CH), 104.05 (CH), 86.99 (C<sub>q</sub>), 75.74 (CH), 72.92 (C<sub>q</sub>), 66.73 (CH), 65.00 (CH<sub>2</sub>), 40.23 (CH), 30.07 (CH<sub>3</sub>), 30.01 (CH<sub>3</sub>) ppm; IR (ATR): 3379, 3270, 1112, 1031, 878, 657  $\text{cm}^{-1}$ ; HRMS (m/z):  $[\text{M}-\text{OH}]^+$  calcd. for C<sub>20</sub>H<sub>19</sub>O<sub>4</sub>, 323.1278; found, 323.1273.

## Supplementary Note 20

### Synthesis of **1** and **2**: Preparation of Pterocarpan **12**

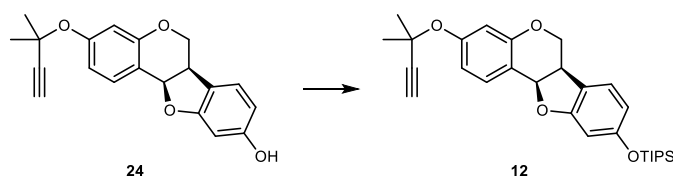

To a solution of pterocarpan **24** (1.291 g, 4.02 mmol, >99% *ee*) in DCM (8.0 mL) DMAP (48.9 mg, 0.40 mmol, 0.1 equiv.), triethylamine (1.7 mL, 12.0 mmol, 3.0 equiv.) and TIPSCl (2.6 mL, 12.0 mmol, 3.0 equiv.) were added subsequently. The reaction was stirred for 19 h at room temperature and quenched by addition of saturated aqueous NH<sub>4</sub>Cl solution. The mixture was extracted three times with DCM, the combined organic layers were dried over MgSO<sub>4</sub>, the solvents were removed in vacuo, and the residue was purified by flash chromatography (DCM:pentane 2:1 v/v) to afford pterocarpan **12** (1.863 g, 97%, >99% *ee*) as a colourless oil.

TLC (DCM:pentane 2:1 *v/v*):  $R_f = 0.68$ ;  $[\alpha]_D^{25} = -119.5$  (*c* 0.45  $\text{CHCl}_3$ );  $^1\text{H NMR}$  (500 MHz,  $\text{CDCl}_3$ ):  $\delta$  7.43 (d,  $J = 8.5$  Hz, 1H), 7.07 (d,  $J = 7.6$  Hz, 1H), 6.92 (dd,  $J = 8.4$  Hz,  $J = 2.4$  Hz, 1H), 6.89 (d,  $J = 2.5$  Hz, 1H), 6.42–6.47 (m, 2H), 5.50 (d,  $J = 6.6$  Hz, 1H), 4.26 (dd,  $J = 10.4$  Hz,  $J = 4.7$  Hz, 1H), 3.59 (t,  $J = 11.0$  Hz, 1H), 3.52 (ddd,  $J = 11.3$  Hz,  $J = 6.5$  Hz,  $J = 4.9$  Hz, 1H), 2.60 (s, 1H), 1.67 (s, 3H), 1.67 (s, 3H), 1.20–1.30 (m, 3H), 1.07–1.13 (m, 18H) ppm;  $^{13}\text{C NMR}$  (126 MHz,  $\text{CDCl}_3$ ):  $\delta$  160.38 ( $\text{C}_q$ ), 157.33 ( $\text{C}_q$ ), 156.99 ( $\text{C}_q$ ), 155.87 ( $\text{C}_q$ ), 131.16 (CH), 124.55 (CH), 119.44 ( $\text{C}_q$ ), 115.08 (CH), 114.25 ( $\text{C}_q$ ), 112.48 (CH), 109.12 (CH), 102.65 (CH), 85.76 ( $\text{C}_q$ ), 78.38 (CH), 74.10 (CH), 72.36 ( $\text{C}_q$ ), 66.65 ( $\text{CH}_2$ ), 39.51 (CH), 29.56 ( $\text{CH}_3$ ), 29.51 ( $\text{CH}_3$ ), 17.88 ( $\text{CH}_3$ ), 12.60 (CH) ppm; IR (ATR): 3289, 1492, 1145, 1106, 969, 880, 636  $\text{cm}^{-1}$ ; MS (ESI):  $m/z = 479.4$   $[\text{M}+\text{H}]^+$ ; analysis (calcd., found for  $\text{C}_{29}\text{H}_{38}\text{O}_4\text{Si}$ ): C (72.76, 72.88), H (8.00, 8.28).

## Supplementary Note 21

### Synthesis of 1 and 2: Preparation of 6a-Hydroxypterocarpan 11 and Isoflavanone 25

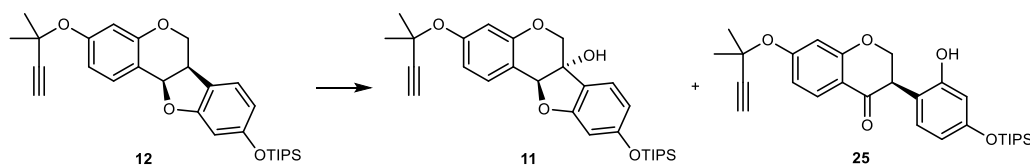

Pterocarpan **12** (125.9 mg, 0.26 mmol, >99% *ee*), *N*-hydroxyphthalimide (42.9 mg, 0.26 mmol, 1.0 equiv.) and cobalt(II) acetate (23.3 mg, 0.13 mmol, 0.5 equiv.) were dissolved in MeCN (5.3 mL) in a 10 mL round-bottomed flask, and 1,1,1,3,3,3-hexafluoropropan-2-ol (0.08 mL, 0.79 mmol, 3.0 equiv.) was added. The argon atmosphere was replaced with oxygen (balloon), and the reaction mixture was stirred for 1 h at room temperature. The oxygen atmosphere was replaced with argon, and triphenylphosphine (69.0 mg, 0.26 mmol, 1.0 equiv.) was added. After additional stirring for 45 min, the reaction was quenched by addition of saturated aqueous

NH<sub>4</sub>Cl solution. The mixture was extracted three times with EtOAc, the combined organic layers were dried over MgSO<sub>4</sub>, the solvents were removed in vacuo, and the residue was purified by flash chromatography (DCM:EtOAc 30:1 v/v) to afford 6a-hydroxypterocarpan **11** (72.2 mg, 55%, >99% *ee*) as a brown gum and isoflavanone **25** (24.6 mg, 19%, 92% *ee*) as a yellowish solid.

6a-Hydroxypterocarpan **11**:

TLC (DCM:EtOAc 30:1 v/v): R<sub>f</sub> = 0.45; [α]<sub>D</sub><sup>25</sup> = -137.0 (*c* 0.36 CHCl<sub>3</sub>); <sup>1</sup>H NMR (500 MHz, CDCl<sub>3</sub>): δ 7.40 (d, *J* = 8.5 Hz, 1 H), 7.18 (d, *J* = 8.2 Hz, 1H), 6.93 (dd, *J* = 8.5 Hz, *J* = 2.5 Hz, 1H), 6.90 (d, *J* = 2.5 Hz, 1H), 6.52 (dd, *J* = 8.0 Hz, *J* = 2.0 Hz, 1H), 6.41 (d, *J* = 1.9 Hz, 1H), 5.25 (s, 1H), 4.23 (dd, *J* = 11.7 Hz, *J* = 0.9 Hz, 1H), 3.91 (d, *J* = 11.7 Hz, 1H), 2.60 (br. s, 2H), 1.66 (s, 6H), 1.20–1.31 (m, 3H), 1.07–1.13 (m, 18H) ppm; <sup>13</sup>C NMR (126 MHz, CDCl<sub>3</sub>): δ 160.45 (C<sub>q</sub>), 158.78 (C<sub>q</sub>), 157.04 (C<sub>q</sub>), 155.03 (C<sub>q</sub>), 131.25 (CH), 123.60 (CH), 120.49 (C<sub>q</sub>), 115.55 (CH), 113.94 (C<sub>q</sub>), 113.33 (CH), 108.95 (CH), 103.02 (CH), 85.67 (C<sub>q</sub>), 84.25 (CH), 76.79 (C<sub>q</sub>), 74.21 (CH), 72.33 (C<sub>q</sub>), 70.06 (CH<sub>2</sub>), 29.52 (CH<sub>3</sub>), 29.50 (CH<sub>3</sub>), 17.86 (CH<sub>3</sub>), 12.59 (CH) ppm; IR (ATR): 1493, 1123, 970 cm<sup>-1</sup>; MS (ESI): *m/z* = 495.4 [M+H]<sup>+</sup>; analysis (calcd., found for C<sub>29</sub>H<sub>38</sub>O<sub>5</sub>Si): C (70.41, 70.27), H (7.74, 8.02).

Isoflavanone **25**:

mp: 34–36 °C; TLC (DCM:EtOAc 30:1 v/v): R<sub>f</sub> = 0.54; [α]<sub>D</sub><sup>25</sup> = +254.8 (*c* 1.18 CHCl<sub>3</sub>); <sup>1</sup>H NMR (300 MHz, CDCl<sub>3</sub>): δ 8.24 (s, 1H), 7.84 (d, *J* = 8.9 Hz, 1H), 7.35 (d, *J* = 8.5 Hz, 1H), 6.91 (d, *J* = 2.5 Hz, 1H), 6.82 (dd, *J* = 8.9 Hz, *J* = 2.3 Hz, 1H), 6.52 (d, *J* = 2.5 Hz, 1H), 6.44 (dd, *J* = 8.4 Hz, *J* = 2.5 Hz, 1H), 4.96 (dd, *J* = 11.9 Hz, 2.8 Hz, 1H), 4.81 (dd, *J* = 11.9 Hz, *J* = 4.5 Hz, 1H), 3.93 (t, *J* = 3.8 Hz, 1H), 2.69 (s, 1H), 1.73 (s, 6H), 1.17–1.32 (m, 3H), 1.04–1.13 (m, 18H) ppm; <sup>13</sup>C NMR (75 MHz, CDCl<sub>3</sub>): δ 193.20 (C<sub>q</sub>), 163.50 (C<sub>q</sub>), 163.12 (C<sub>q</sub>), 157.16 (C<sub>q</sub>), 156.41 (C<sub>q</sub>), 129.36 (CH), 127.18 (CH), 115.47 (C<sub>q</sub>), 114.14 (CH), 113.25 (C<sub>q</sub>), 112.69 (CH), 109.43 (CH), 105.84 (CH), 84.54 (C<sub>q</sub>), 75.28 (CH), 72.52 (C<sub>q</sub>), 70.00 (CH<sub>2</sub>), 45.64 (CH),

29.65 (CH<sub>3</sub>), 29.37 (CH<sub>3</sub>), 17.91 (CH<sub>3</sub>), 12.63 (CH) ppm; IR (ATR): 3291, 1600, 1243, 1123, 1104, 989, 847, 634 cm<sup>-1</sup>; MS (ESI): *m/z* = 495.6 [M+H]<sup>+</sup>; analysis (calcd., found for C<sub>29</sub>H<sub>38</sub>O<sub>5</sub>Si): C (70.41, 70.30), H (7.74, 7.59).

## Supplementary Note 22

### Synthesis of **1** and **2**: Preparation of **26** and **27** via Thermal Pyran Ring Annellation in DMSO

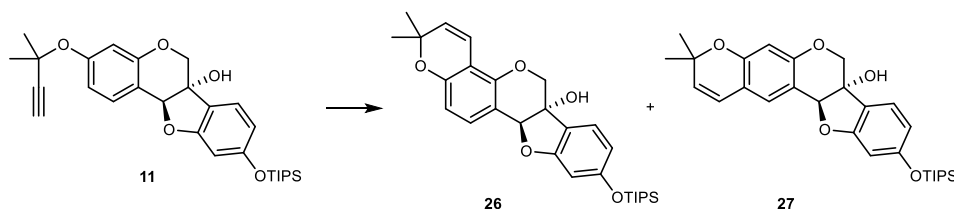

A solution of 6a-hydroxypterocarpan **11** (291.4 mg, 0.59 mmol, >99% *ee*) in DMSO (5.7 mL) was heated to 175 °C for 40 min. The reaction mixture was cooled to room temperature, diluted with EtOAc (40 mL) and washed twice with water (2x 40 mL). The organic layer was dried over MgSO<sub>4</sub>, the solvents were removed in vacuo, and the residue was purified twice by flash chromatography (DCM:EtOAc 40:1 *v/v*) to afford 9-*O*-TIPS-glyceollin I (**26**, 202.3 mg, 69%, >99% *ee*) as a yellowish solid and 9-*O*-TIPS-glyceollin II (**27**, 33.8 mg, 12%, >99% *ee*, **27/26** ≈ 29:1) as a yellowish solid.

#### 9-*O*-TIPS-glyceollin I (**26**):

mp: 51–54 °C; TLC (DCM:EtOAc 40:1 *v/v*): *R<sub>f</sub>* = 0.48; [α]<sub>D</sub><sup>25</sup> = –131.9 (*c* 0.39 CHCl<sub>3</sub>); <sup>1</sup>H NMR (300 MHz, CDCl<sub>3</sub>): δ 7.25 (d, *J* = 8.7 Hz, 1H), 7.19 (d, *J* = 8.1 Hz, 1H), 6.63 (d, *J* = 10.0 Hz, 1H), 6.56 (d, *J* = 8.5 Hz, 1H), 6.51 (dd, *J* = 8.1 Hz, *J* = 2.1 Hz, 1H), 6.40 (d, *J* = 2.1 Hz, 1H), 5.58 (d, *J* = 10.0 Hz, 1H), 5.24 (s, 1H), 4.25 (dd, *J* = 11.5 Hz, *J* = 0.9 Hz, 1H), 3.93 (d, *J* = 11.5 Hz, 1H), 2.45 (s, 1H), 1.43 (s, 3H), 1.42 (s, 3H), 1.17–1.33 (m, 3H), 1.02–1.16 (m, 18H) ppm; <sup>13</sup>C NMR (75 MHz, CDCl<sub>3</sub>): δ 160.54 (C<sub>q</sub>), 158.81 (C<sub>q</sub>), 154.13 (C<sub>q</sub>), 150.35 (C<sub>q</sub>), 130.80

(CH), 129.28 (CH), 123.57 (CH), 120.49 (C<sub>q</sub>), 116.46 (CH), 113.28 (CH), 112.00 (C<sub>q</sub>), 111.13 (CH), 110.29 (C<sub>q</sub>), 103.02 (CH), 84.66 (CH), 76.73 (C<sub>q</sub>), 76.21 (C<sub>q</sub>), 70.10 (CH<sub>2</sub>), 27.84 (CH<sub>3</sub>), 27.79 (CH<sub>3</sub>), 17.88 (CH<sub>3</sub>), 12.60 (CH) ppm; IR (ATR): 3374, 1150, 1116, 1082, 970, 682 cm<sup>-1</sup>; MS (ESI): m/z = 495.6 [M+H]<sup>+</sup>; analysis (calcd., found for C<sub>29</sub>H<sub>38</sub>O<sub>5</sub>Si): C (70.41, 70.45), H (7.74, 8.01).

### 9-O-TIPS-glyceollin II (27):

mp: 49–51 °C; TLC (DCM:EtOAc 40:1 v/v): R<sub>f</sub> = 0.39; [α]<sub>D</sub><sup>25</sup> = -152.0 (c 0.15 CHCl<sub>3</sub>); <sup>1</sup>H NMR (500 MHz, CDCl<sub>3</sub>): δ 7.19 (d, *J* = 8.2 Hz, 1H), 7.12 (s, 1H), 6.51 (dd, *J* = 8.2 Hz, *J* = 2.2 Hz, 1H), 6.40 (d, *J* = 1.9 Hz, 1H), 6.39 (s, 1H), 6.32 (d, *J* = 10.1 Hz, 1H), 5.56 (d, *J* = 9.8 Hz, 1H), 5.24 (s, 1H), 4.21 (dd, *J* = 11.7 Hz, *J* = 0.9 Hz, 1H), 3.92 (d, *J* = 11.7 Hz, 1H), 2.42 (s, 1H), 1.44 (s, 3H), 1.41 (s, 3H), 1.20–1.29 (m, 3H), 1.07–1.12 (m, 18H) ppm; <sup>13</sup>C (125 MHz, CDCl<sub>3</sub>): δ 160.47 (C<sub>q</sub>), 158.82 (C<sub>q</sub>), 155.43 (C<sub>q</sub>), 154.61 (C<sub>q</sub>), 129.35 (CH), 128.34 (CH), 123.59 (CH), 121.53 (CH), 120.44 (C<sub>q</sub>), 116.92 (C<sub>q</sub>), 113.35 (CH), 112.08 (C<sub>q</sub>), 104.81 (CH), 103.01 (CH), 84.41 (CH), 76.63 (C<sub>q</sub>), 69.99 (CH<sub>2</sub>), 28.14 (CH<sub>3</sub>), 28.00 (CH<sub>3</sub>), 17.87 (CH<sub>3</sub>), 12.61 (CH) ppm; IR (ATR): 3405, 1492, 1124, 970, 682 cm<sup>-1</sup>; MS (ESI): m/z = 495.4 [M+H]<sup>+</sup>; analysis (calcd., found for C<sub>29</sub>H<sub>38</sub>O<sub>5</sub>Si): C (70.41, 70.75), H (7.74, 7.74).

## Supplementary Note 23

### Synthesis of 1 and 2: Preparation of 26 and 27 via Thermal Pyran Ring Annellation in

#### DMF

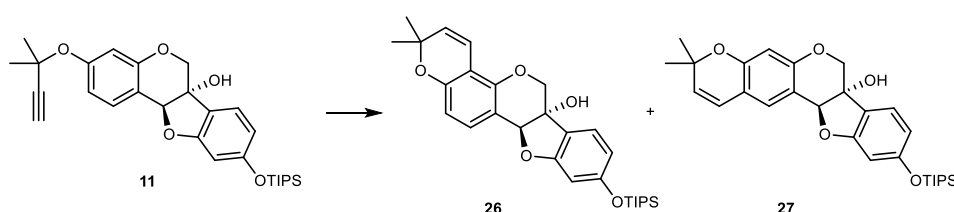

A 20 mL sealed tube was charged with 6a-hydroxypterocarpan **11** (204.8 mg, 0.41 mmol, >99% *ee*) in DMF (4.1 mL) and heated to 175 °C for 1 h. The reaction was cooled to room temperature, water was added, and the resulting mixture was extracted three times with EtOAc. The combined organic layers were dried over MgSO<sub>4</sub>, the solvents were removed in vacuo, and the residue was subjected twice to flash chromatography (DCM:EtOAc 40:1 *v/v*) to afford a first fraction with 9-*O*-TIPS-glyceollin I (**26**, 145.0 mg, 70%, >99% *ee*, yellowish solid) and a second fraction (36.3 mg, 11% **27** + 7% **26**, >99% *ee*) as a yellowish solid. For complete separation repeated flash chromatography is necessary.

For analytical data, see Supplementary Note 22.

## Supplementary Note 24

### Synthesis of **1** and **2**: Preparation of **26** and **27** via Gold(I)-Catalysed Hydroarylation

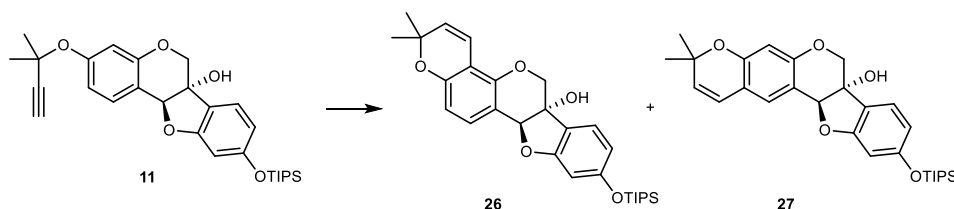

In a 10 mL round-bottomed flask 6a-hydroxypterocarpan **11** (285.9 mg, 0.58 mmol, >99% *ee*) was dissolved in dichloroethane (5.8 mL), and (2-di-*tert*-butylphosphino-3,4,5,6-tetramethyl-2',4',6'-triisopropylbiphenyl)gold(I) bis(trifluoromethanesulfonyl)imide (**28**, 2.8 mg, 2.9 μmol, 1 mol%) was added. The reaction was stirred for 3 h at room temperature and quenched with saturated aqueous NH<sub>4</sub>Cl solution. The mixture was extracted three times with DCM, the combined organic layers were dried over MgSO<sub>4</sub>, and the solvents were removed in vacuo. The residue was purified once by flash chromatography (DCM:EtOAc 40:1 *v/v*) to afford a first fraction with 9-*O*-TIPS-glyceollin I (**26**, 148.5 mg, 52%, >99% *ee*) as a yellowish solid and a

second fraction (101.9 mg, 13% **26** + 23% **27**, >99 % *ee*) as a yellowish solid. For separation repeated flash chromatography is necessary.

For analytical data, see Supplementary Note 22.

## Supplementary Note 25

### Synthesis of **1** and **2**: Preparation of Glyceollin I (**1**)

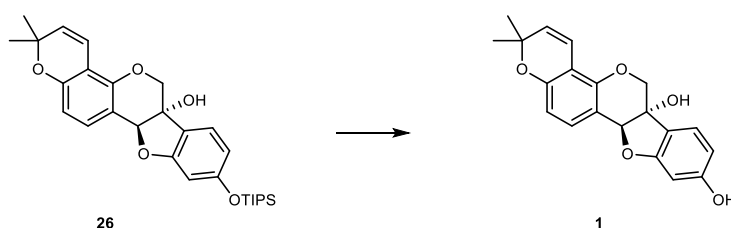

9-*O*-TIPS-Glyceollin I (**26**, 142.9 mg, 0.29 mmol, >99% *ee*) was dissolved in THF (5.0 mL) in a 10 mL round-bottomed flask and cooled to 0 °C. A solution of tetrabutylammonium fluoride (1 M in THF containing 5% water, 0.43 mL, 0.43 mmol, 1.5 equiv.) was added dropwise, and the resulting solution was stirred for 11 min at 0 °C. The reaction mixture was quenched with water at 0 °C, diluted with saturated aqueous NH<sub>4</sub>Cl and extracted three times with Et<sub>2</sub>O. The combined organic layers were dried over MgSO<sub>4</sub>, and the solvents were removed at 25 °C in vacuo. The residue was purified by flash chromatography (Et<sub>2</sub>O:pentane 3:1 *v/v*), the solvents were removed in vacuo, and the product was dissolved in methanol (1 mL). Water (2 mL) was added, the solvents were removed in vacuo, and the resulting white solid was dried over P<sub>2</sub>O<sub>5</sub> to yield glyceollin I (**1**, 88.3 mg, 90%, >99% *ee*) as a white solid.

mp: 99–101 °C (lit.<sup>14</sup> 95–101 °C); TLC (Et<sub>2</sub>O:pentane 3:1 *v/v*): R<sub>f</sub> = 0.39; [α]<sub>D</sub><sup>20</sup> = –218.0 (*c* 0.14 EtOAc) (lit.<sup>14</sup> [α]<sub>D</sub><sup>25</sup> = –202.6 (*c* 0.15 EtOAc)); <sup>1</sup>H NMR (300 MHz, MeOD-*d*<sub>4</sub>): δ 7.21 (d, *J* = 8.5 Hz, 1H), 7.17 (d, *J* = 8.1 Hz, 1H), 6.60 (d, *J* = 10.0 Hz, 1H), 6.47 (d, *J* = 8.3 Hz, 1H), 6.41 (dd, *J* = 8.1 Hz, *J* = 2.1 Hz, 1H), 6.24 (d, *J* = 2.1 Hz, 1H), 5.60 (d, *J* = 9.8 Hz, 1H), 5.17 (s, 1H), 4.17 (dd, *J* = 11.4 Hz, *J* = 0.7 Hz, 1H), 3.94 (d, *J* = 11.5 Hz, 1H), 1.38 (s, 3H), 1.36 (s,



3H) ppm;  $^{13}\text{C}$  (75 MHz, MeOD- $d_4$ ):  $\delta$  162.27 ( $\text{C}_q$ ), 161.29 ( $\text{C}_q$ ), 155.39 ( $\text{C}_q$ ), 151.97 ( $\text{C}_q$ ), 132.35 (CH), 130.47 (CH), 125.31 (CH), 121.28 ( $\text{C}_q$ ), 117.58 (CH), 114.31 ( $\text{C}_q$ ), 111.70 (CH), 111.38 ( $\text{C}_q$ ), 109.54 (CH), 99.13 (CH), 86.07 (CH), 77.32 (C), 77.24 ( $\text{C}_q$ ), 71.25 ( $\text{CH}_2$ ), 28.17 ( $\text{CH}_3$ ) ppm; IR (ATR): 3360, 1609, 1115, 1081, 961  $\text{cm}^{-1}$ ; MS (ESI):  $m/z = 339.2$  [ $\text{M}+\text{H}$ ] $^+$ ; analysis (calcd., found for  $\text{C}_{20}\text{H}_{18}\text{O}_5$ ): C (71.00, 70.83), H (5.36, 5.56).

## Supplementary Note 26

### Synthesis of 1 and 2: Preparation of Glyceollin II (2)

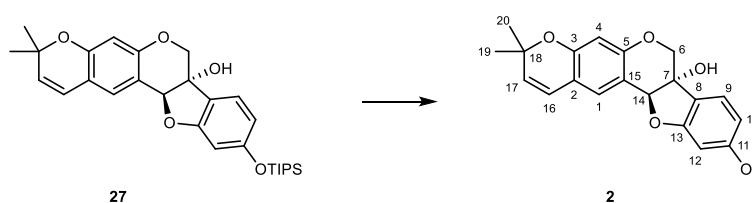

9-*O*-TIPS-Glyceollin II (**27**, 46.0 mg, 93.0  $\mu\text{mol}$ , >99% *ee*) was dissolved in THF (1.9 mL) in a 10 mL round-bottomed flask and cooled to 0  $^{\circ}\text{C}$ . A solution of tetrabutylammonium fluoride (1 M in THF containing 5 % water, 0.14 mL, 0.14 mmol, 1.5 equiv.) was added dropwise, and the resulting solution was stirred for 11 min at 0  $^{\circ}\text{C}$ . The reaction mixture was quenched with water at 0  $^{\circ}\text{C}$ , diluted with saturated aqueous  $\text{NH}_4\text{Cl}$  and extracted three times with  $\text{Et}_2\text{O}$ . The combined organic layers were dried over  $\text{MgSO}_4$ , and the solvents were removed at 25  $^{\circ}\text{C}$  in vacuo. The residue was purified by flash chromatography ( $\text{Et}_2\text{O}$ :pentane 3:1 *v/v*), the solvents were removed in vacuo, and the product was dissolved in methanol (1 mL). Water (2 mL) was added, the solvents were removed in vacuo, and the resulting white solid was dried over  $\text{P}_2\text{O}_5$  to yield glyceollin II (**2**, 30.8 mg, 98%, >99% *ee*) as a white solid.

mp: 101–102  $^{\circ}\text{C}$  (lit.<sup>15</sup> 89–93  $^{\circ}\text{C}$ ); TLC ( $\text{Et}_2\text{O}$ :pentane 3:1 *v/v*):  $R_f = 0.33$ ;  $[\alpha]_{\text{D}}^{20} = -307.0$  (*c* 0.13  $\text{EtOAc}$ );  $^1\text{H}$  NMR (600 MHz, acetone- $d_6$ ):  $\delta$  8.46 (s, 1H, OH-11), 7.21 (d, 1H,  $^3J_{9/10} = 7.9$  Hz, H-9), 7.14 (s, H, H-1), 6.43 (dd, 1H,  $^3J_{10/9} = 8.1$  Hz,  $^4J_{10/12} = 2.1$  Hz, H-10), 6.41 (d, 1H,  $^3J_{16/17} = 9.8$  Hz, H-16), 6.25 (d, 1H,  $^4J_{12/10} = 2.3$  Hz, H-12), 6.21 (s, 1H, H-4), 5.65 (d, 1H,

$^3J_{17/16} = 9.8$  Hz, H-17), 5.25 (s, 1H, H-14), 4.95 (s, 1H, OH-7), 4.13 (d, 1H,  $^2J_{6a/6b} = 11.3$  Hz, H-6a), 4.04 (d, 1H,  $^2J_{6b/6a} = 11.3$  Hz, H-6b), 1.39 (s, 3H, H-19), 1.37 (s, 3H, H-20) ppm;  $^{13}\text{C}$  (151 MHz, acetone- $d_6$ ):  $\delta$  162.04 (C, C-13), 160.84 (C, C-11), 156.91 (C, C-5), 155.33 (C, C-3), 130.02 (CH, C-17), 129.87 (CH, C-1), 125.27 (CH, C-9), 122.38 (CH, C-16), 121.45 (C, C-8), 117.25 (C, C-2), 114.56 (C, C-15), 109.07 (CH, C-10), 104.89 (CH, C-4), 98.79 (CH, C-12), 85.84 (CH, C-14), 77.29 (C, C-18), 76.76 (C, C-7), 70.67 (CH<sub>2</sub>, C-6), 28.41 (CH<sub>3</sub>, C-19/C-20), 28.36 (CH<sub>3</sub>, C-20/C-19) ppm; IR (ATR): 3367, 1622, 1492, 1122, 962 cm<sup>-1</sup>; MS (ESI):  $m/z = 339.3$  [M+H]<sup>+</sup>; analysis (calcd., found for C<sub>20</sub>H<sub>18</sub>O<sub>5</sub>): C (71.00, 70.64), H (5.36, 5.67).

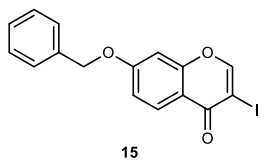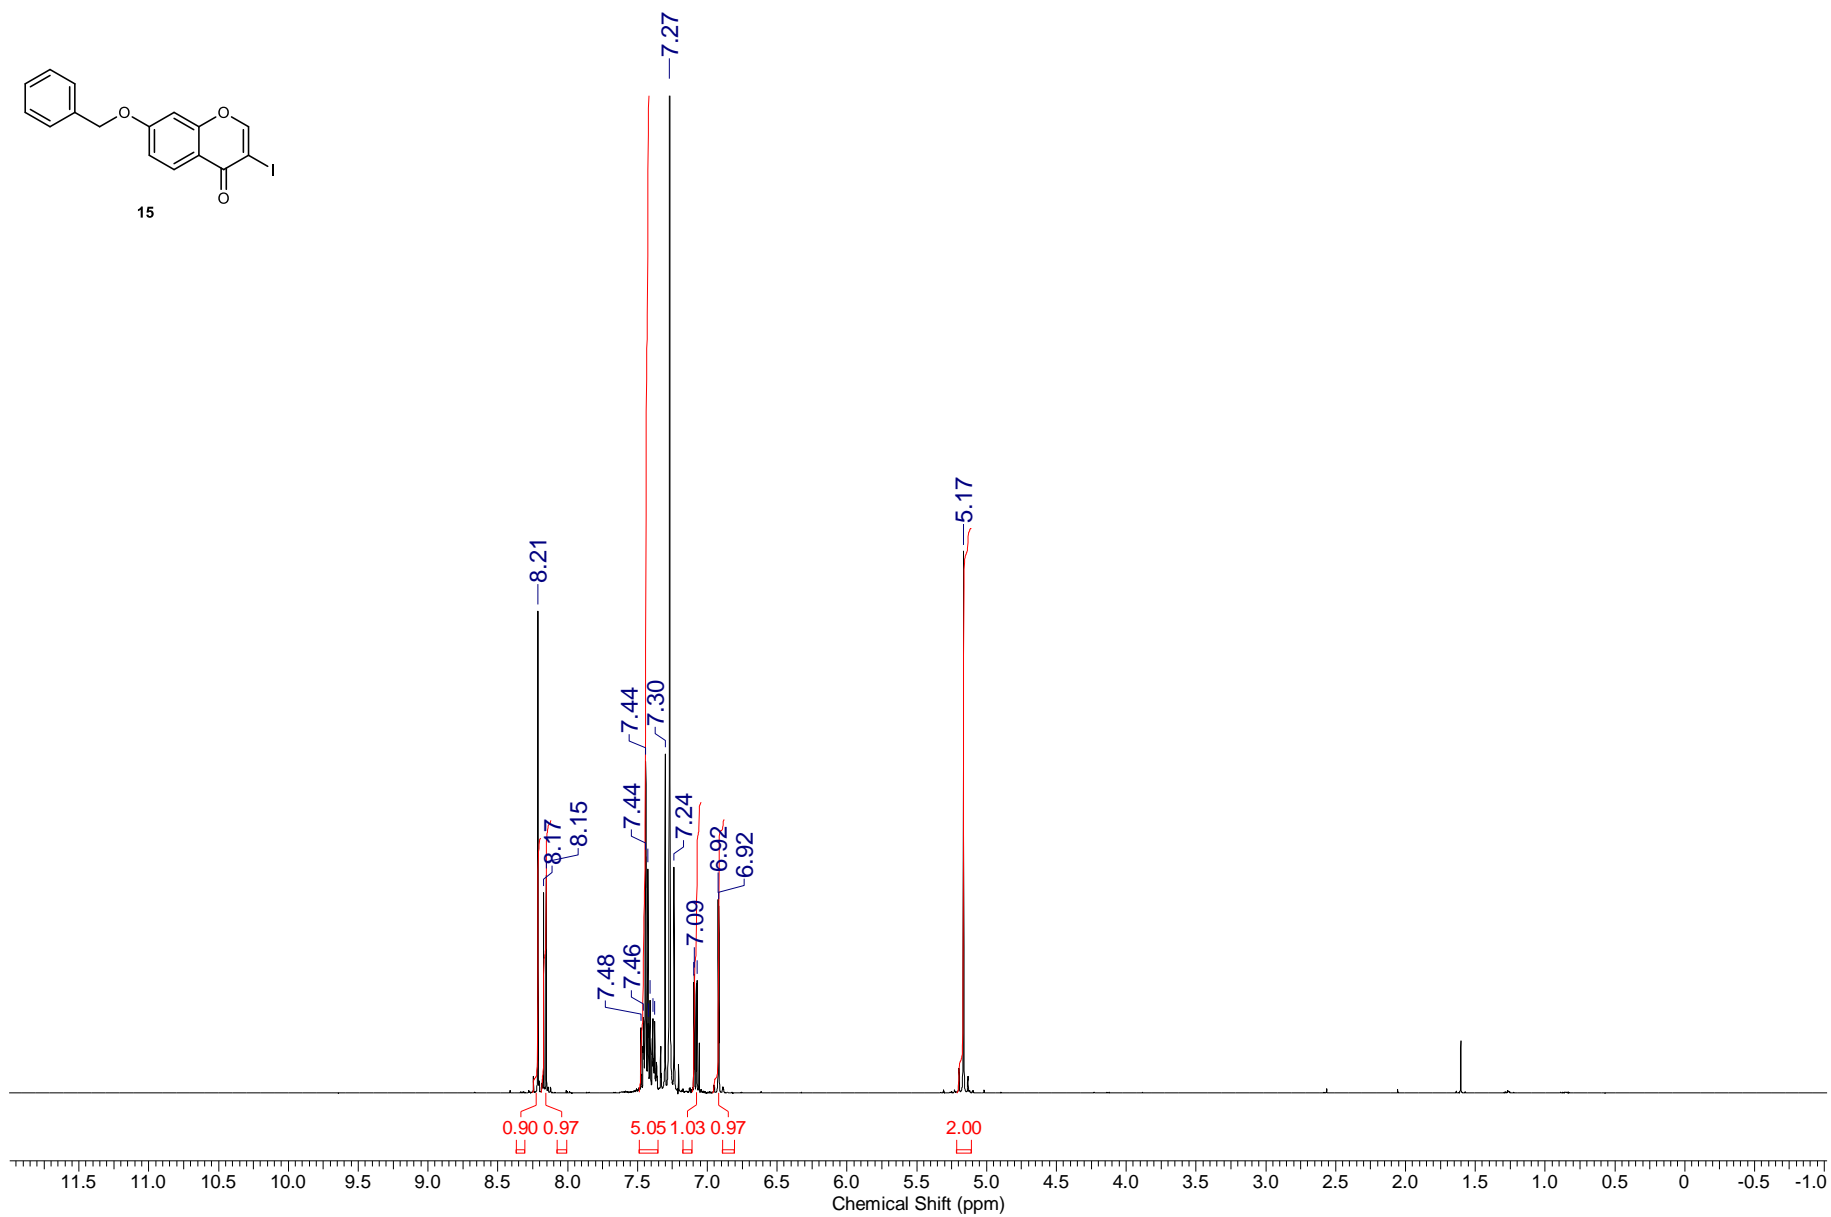

Supplementary Figure 1.  $^1\text{H}$  NMR of 15

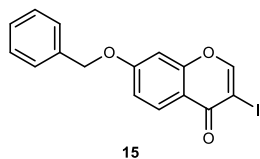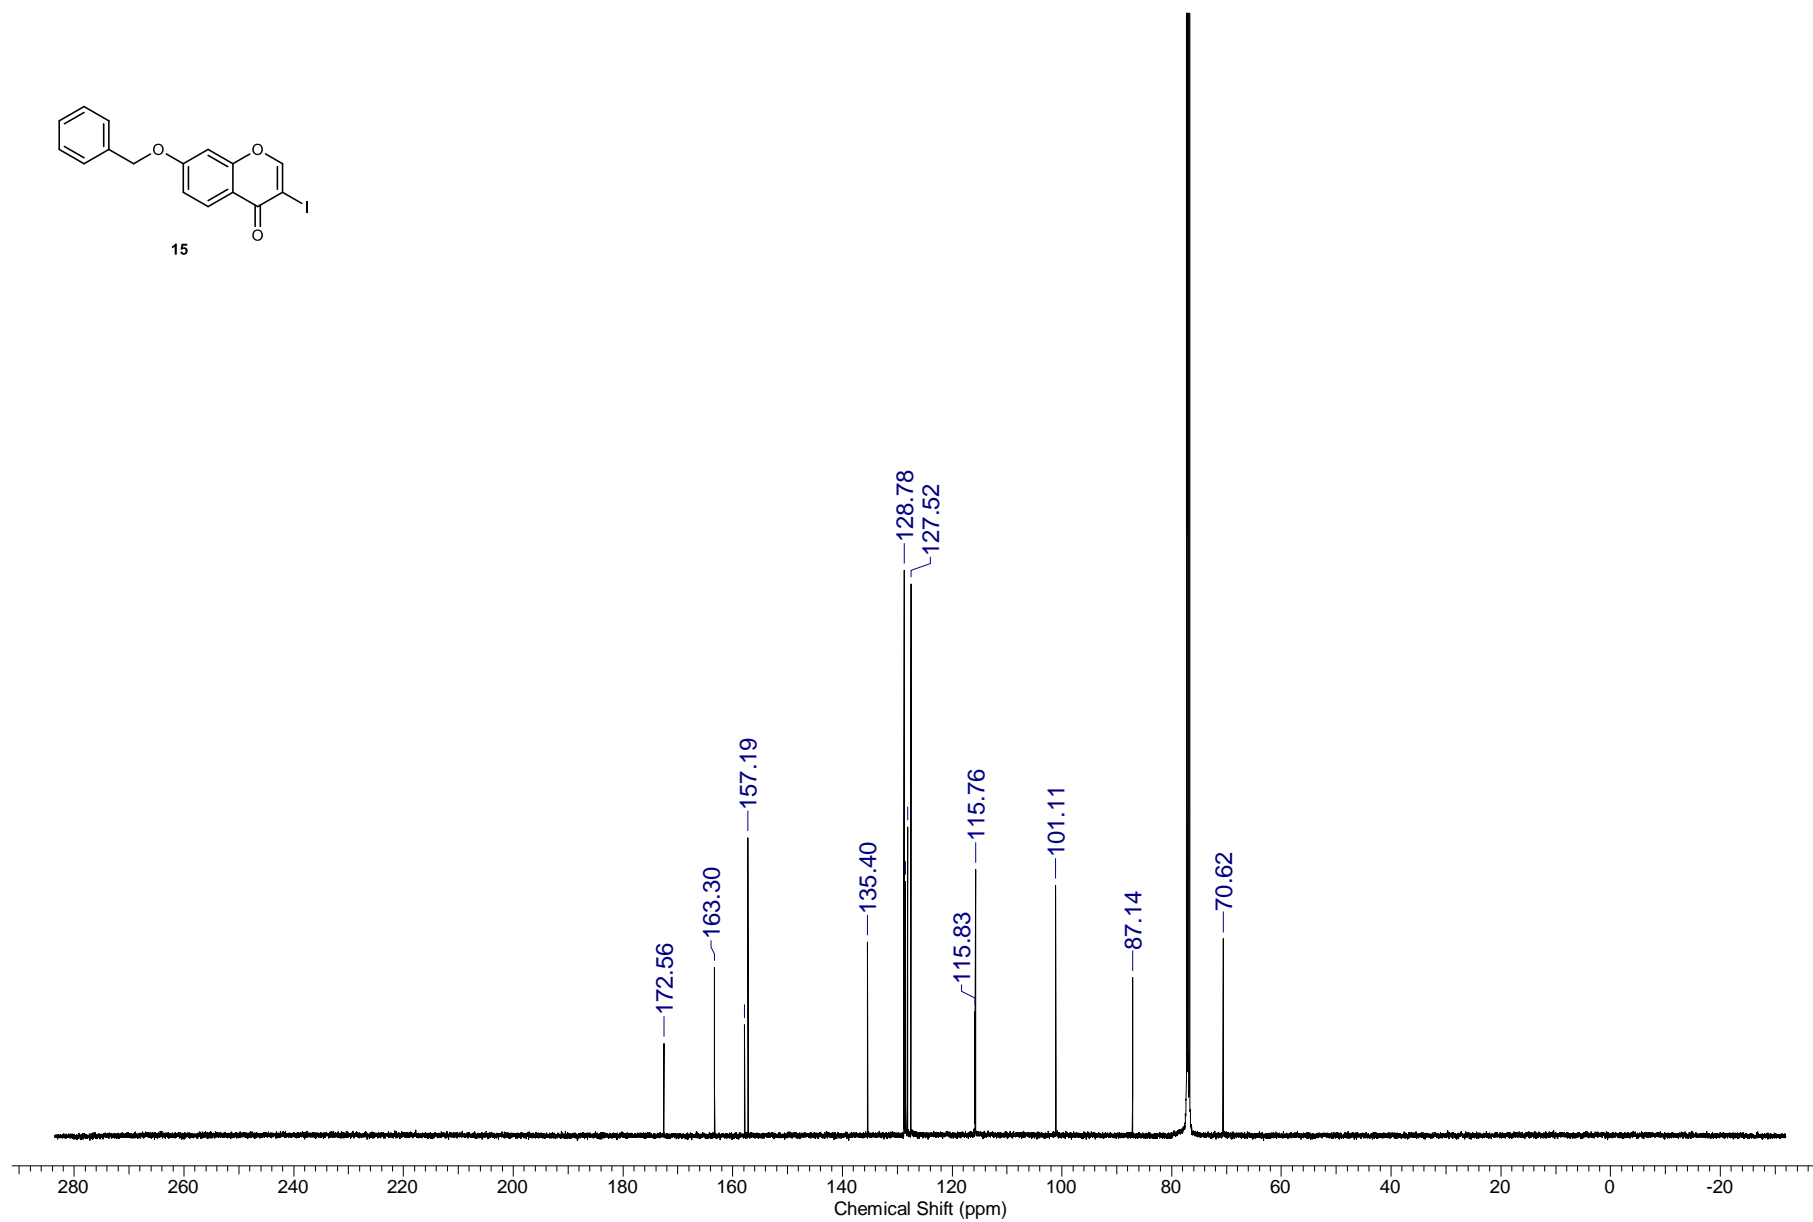

Supplementary Figure 2.  $^{13}\text{C}$  NMR of 15

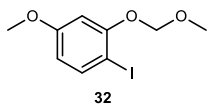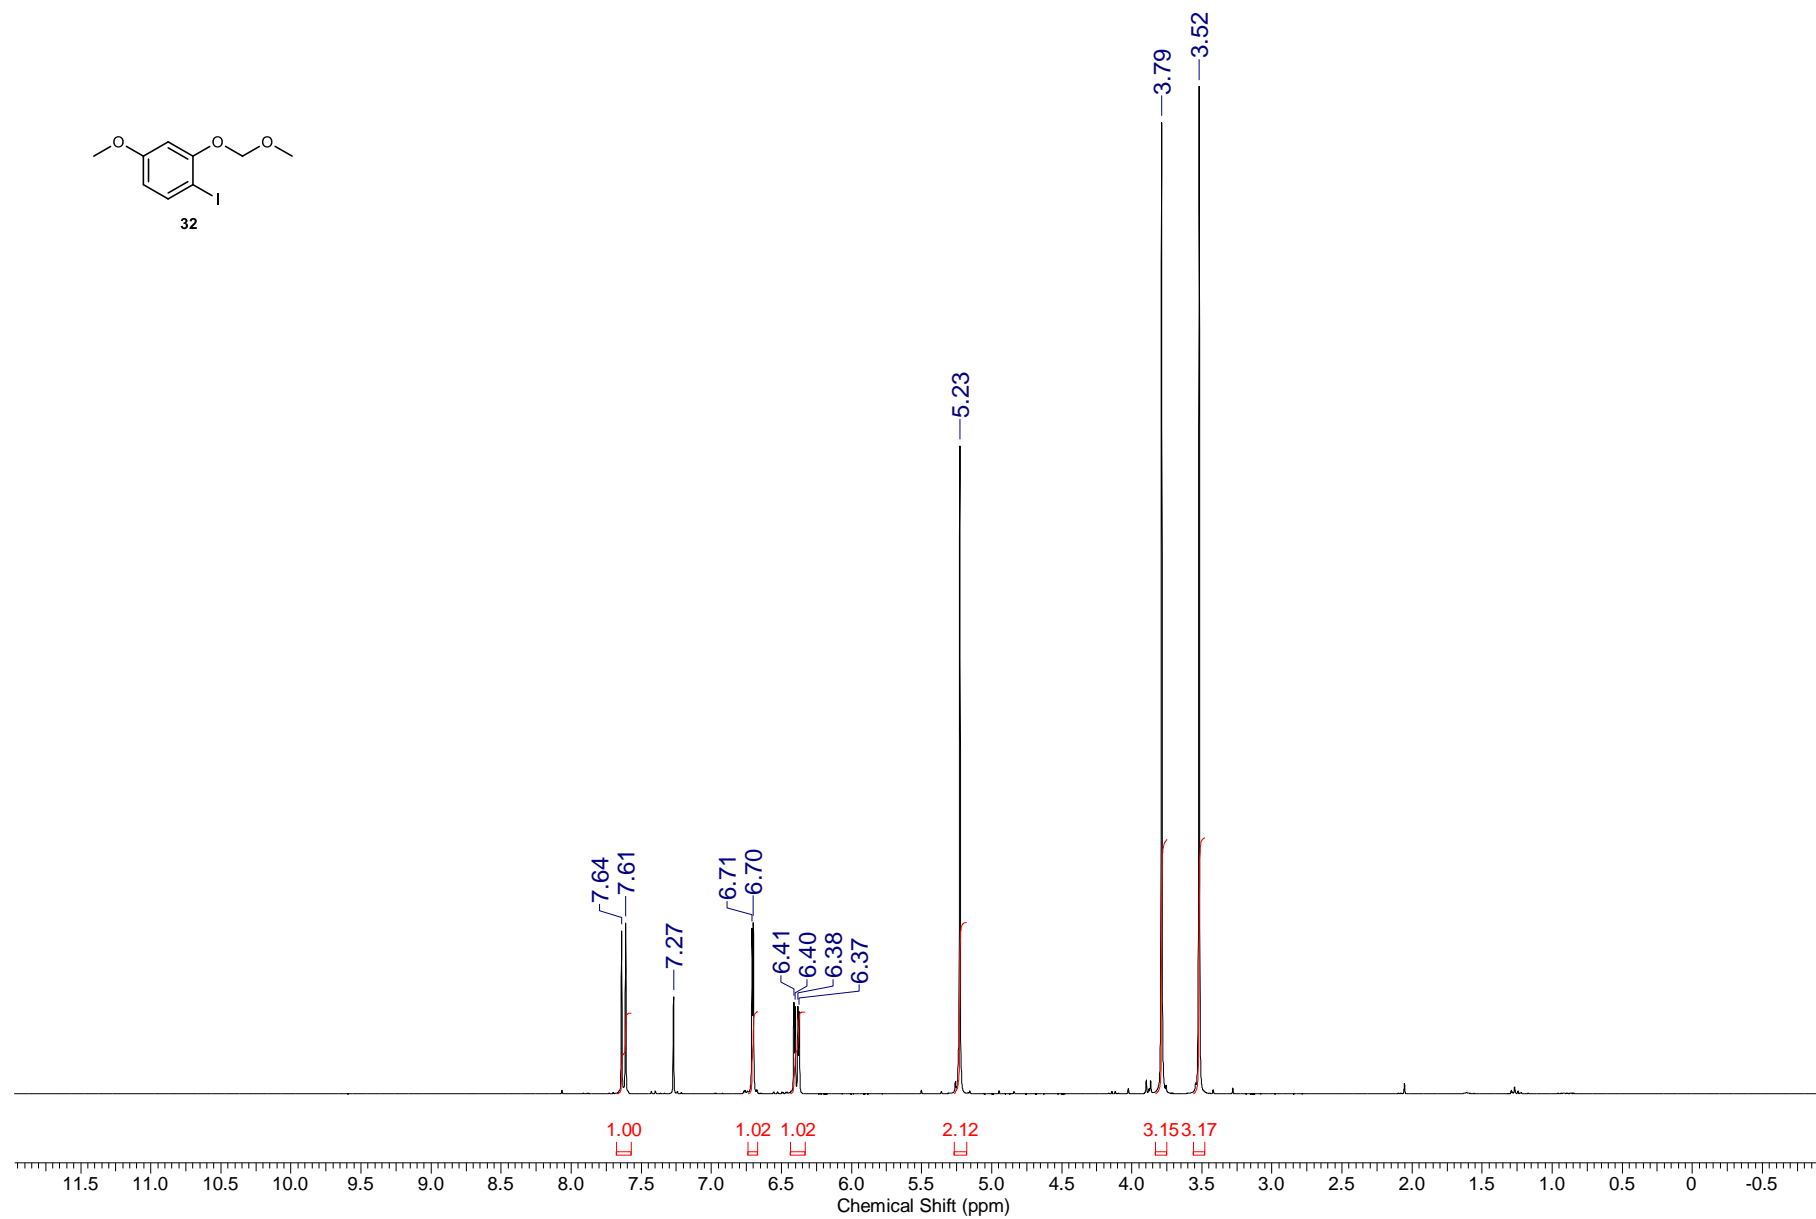

Supplementary Figure 3.  $^1\text{H}$  NMR of 32

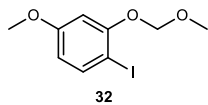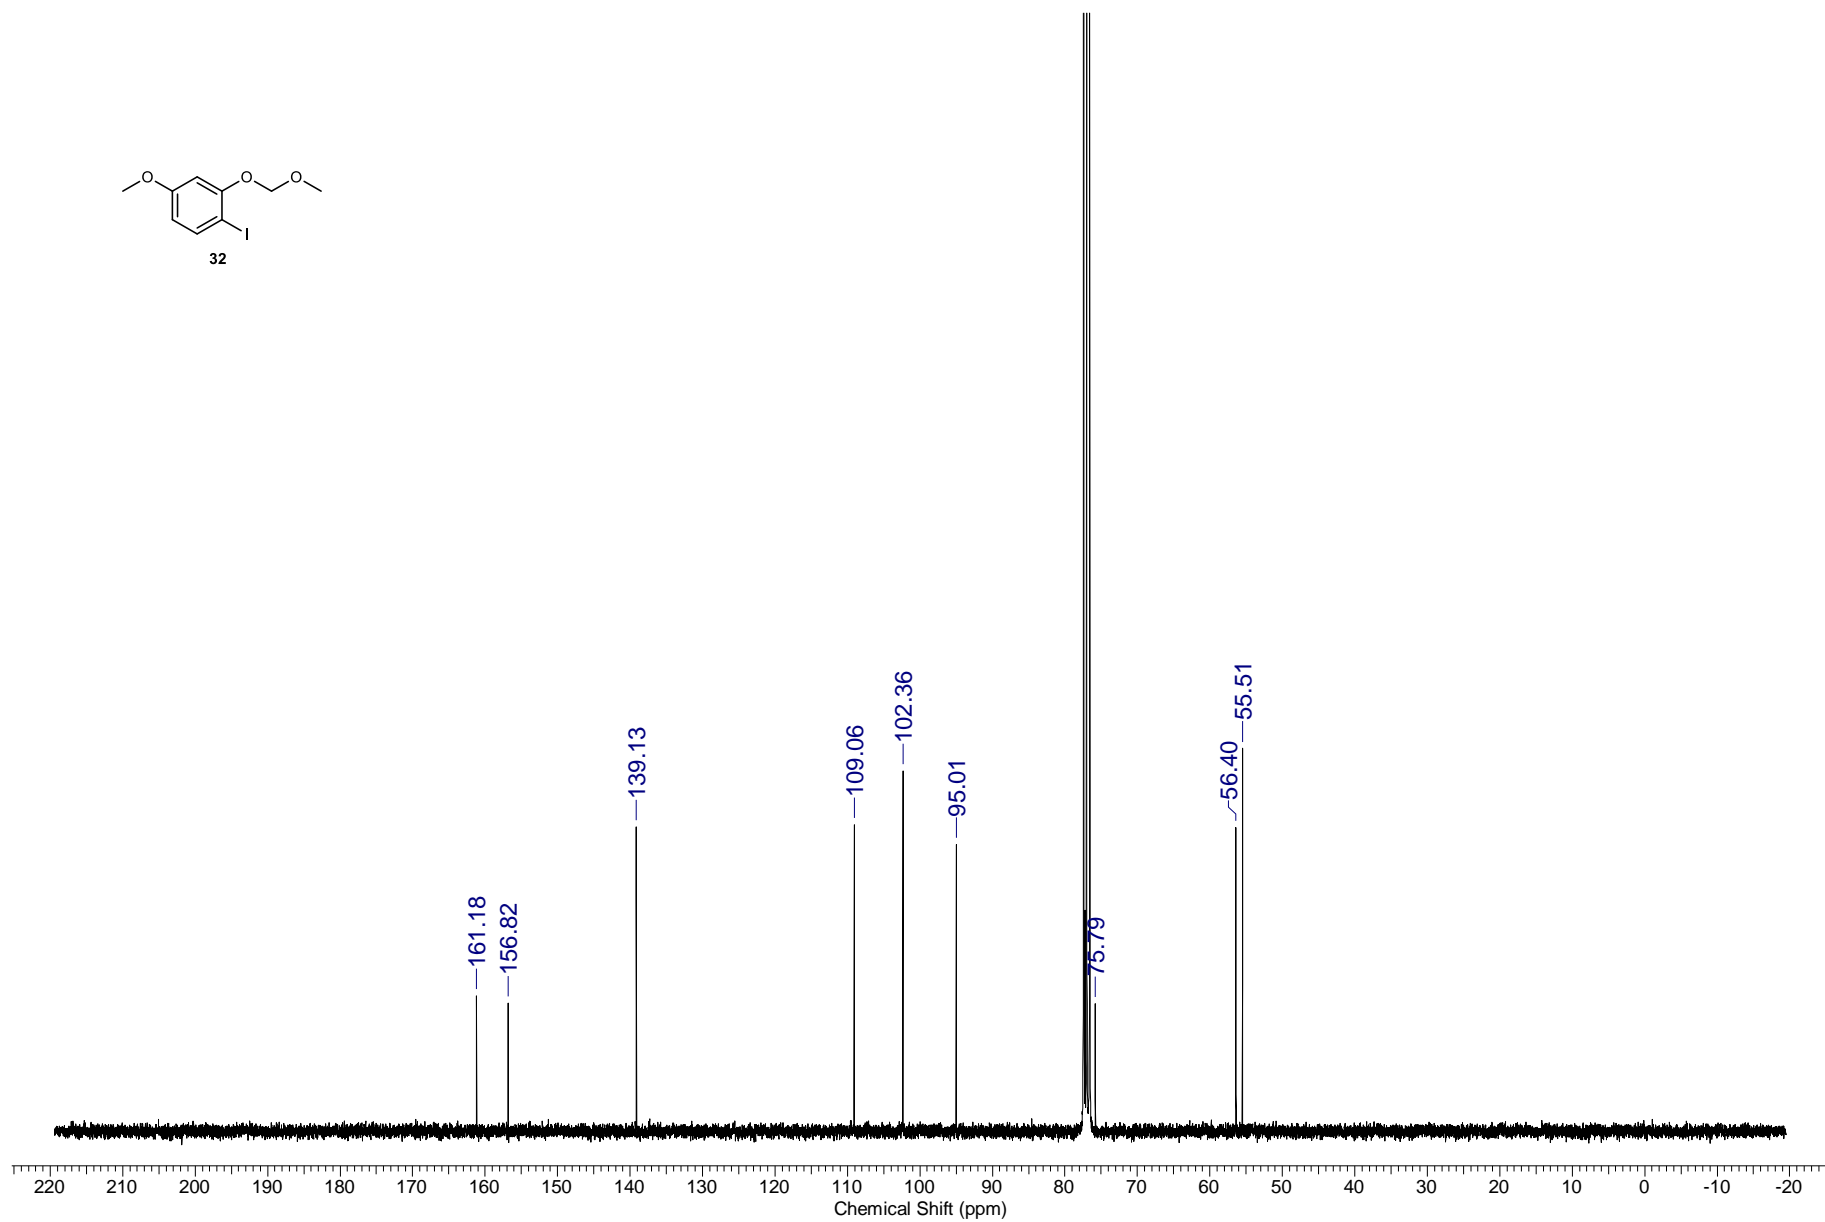

Supplementary Figure 4.  $^{13}\text{C}$  NMR of 32

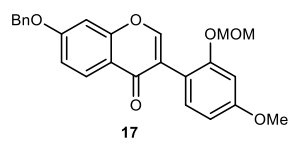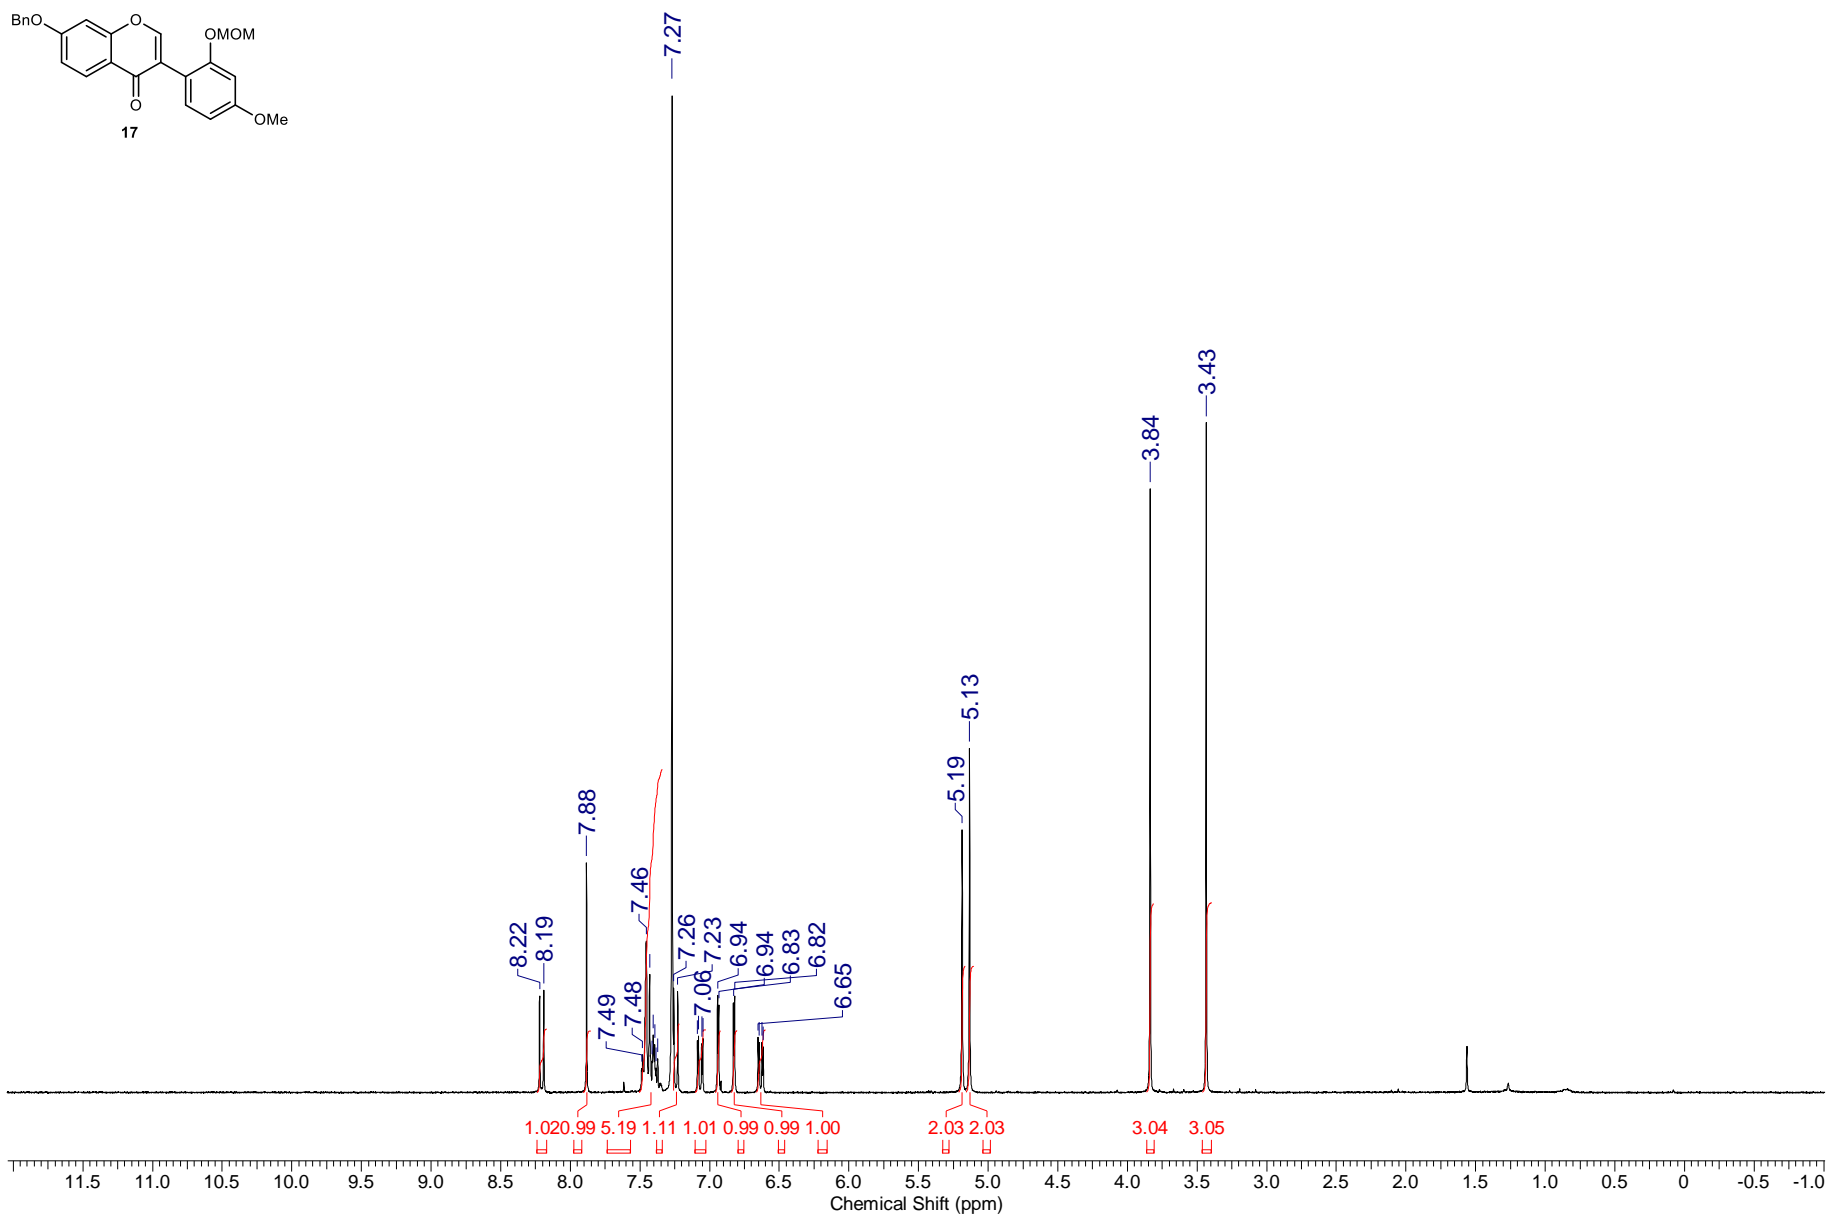

Supplementary Figure 5. <sup>1</sup>H NMR of 17

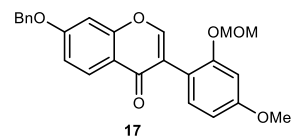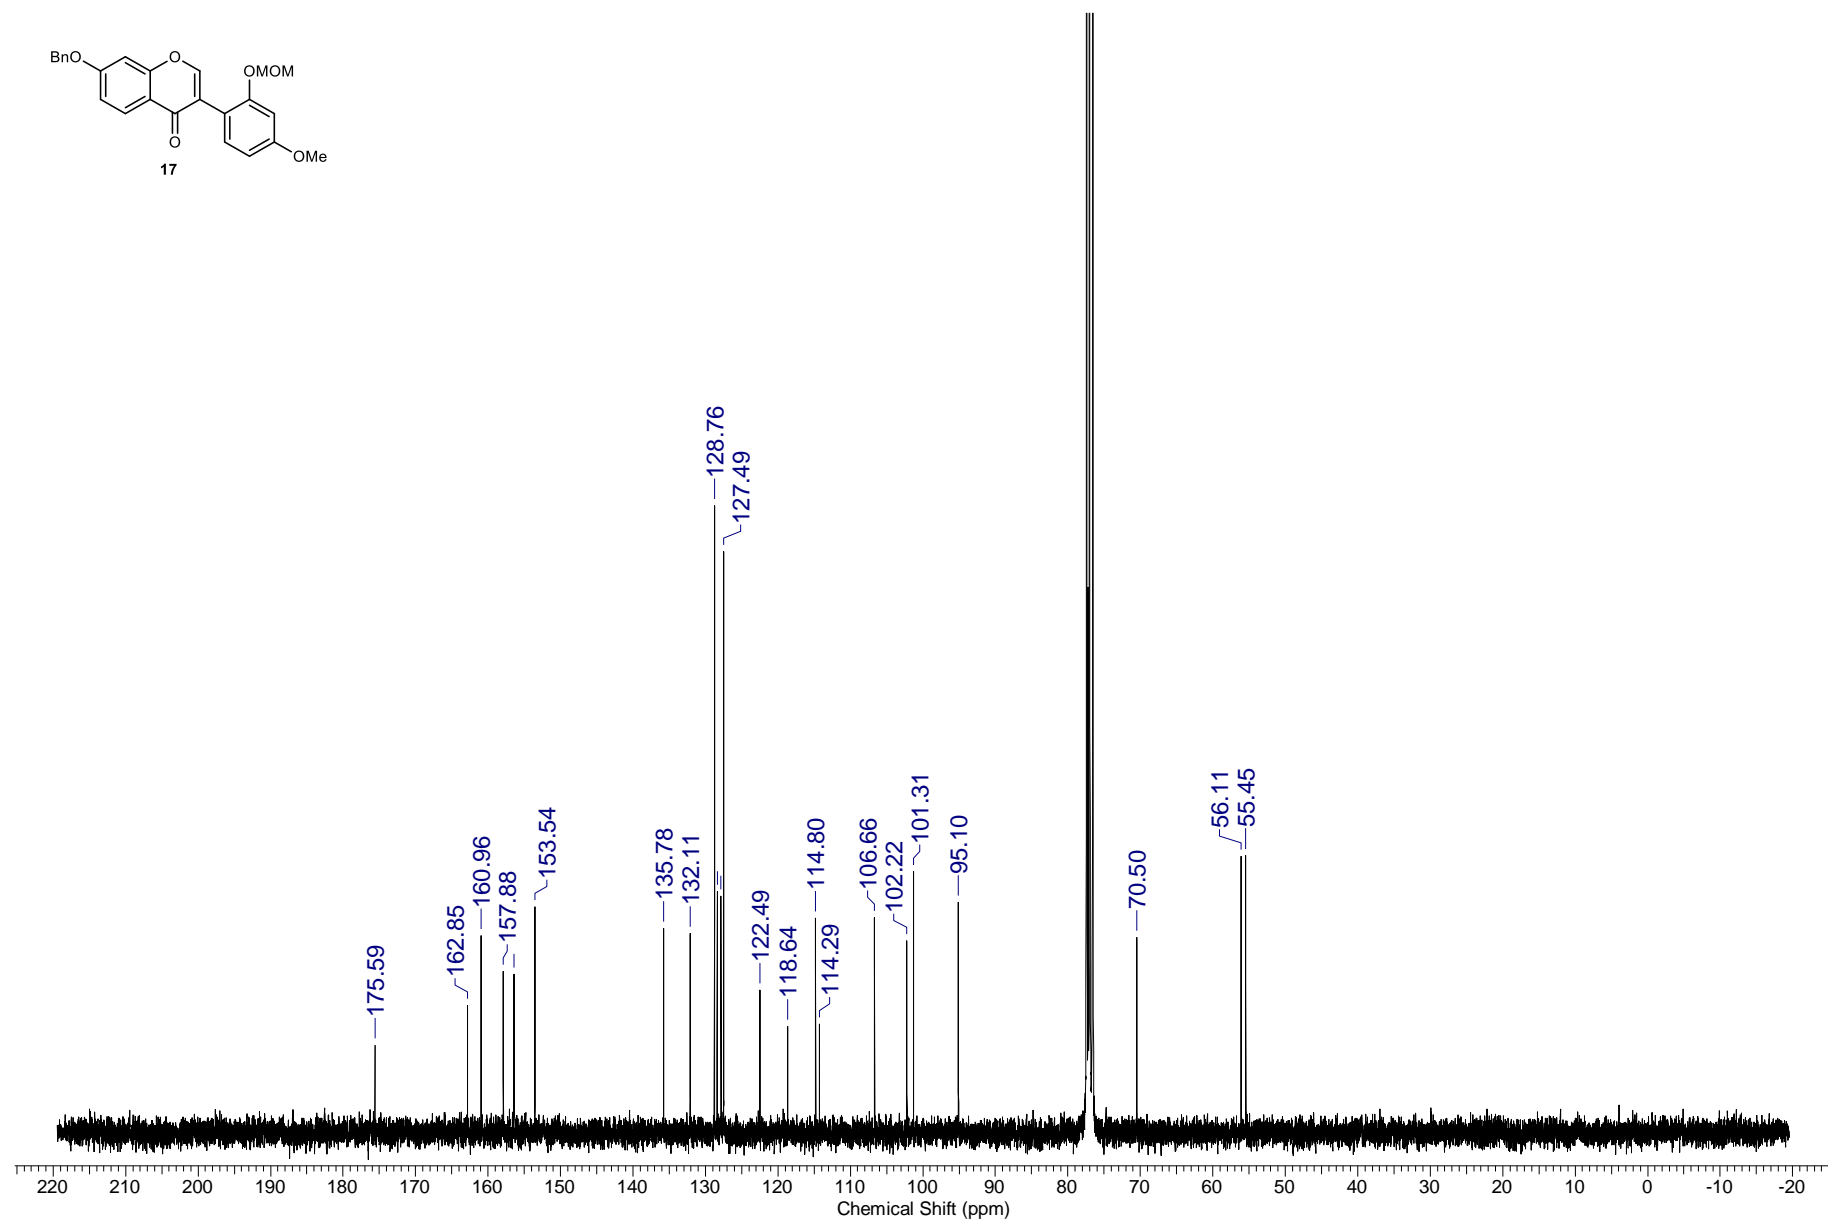

Supplementary Figure 6.  $^{13}\text{C}$  NMR of 17



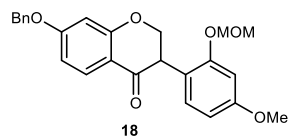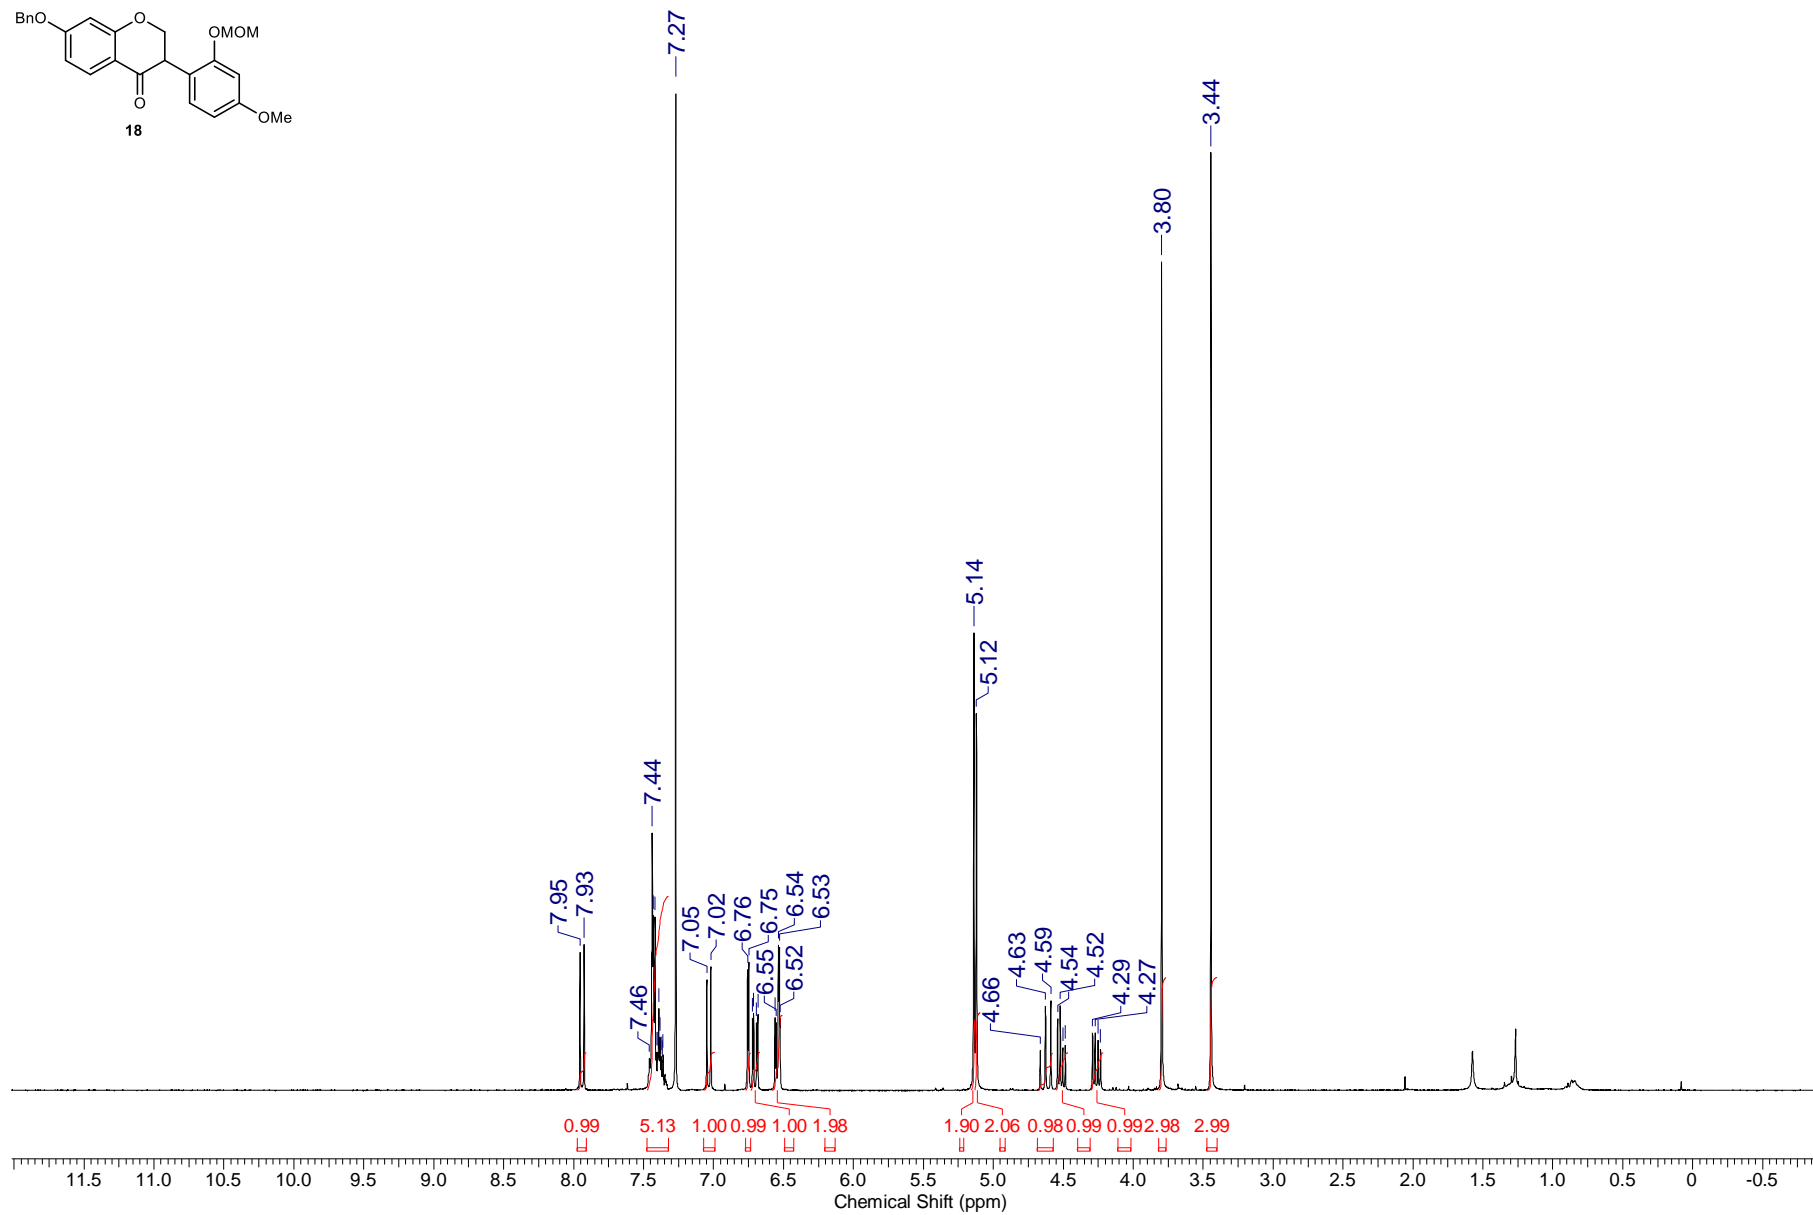

Supplementary Figure 7.  $^1\text{H}$  NMR of **18**

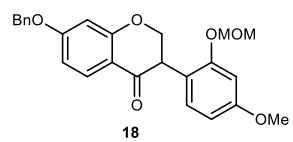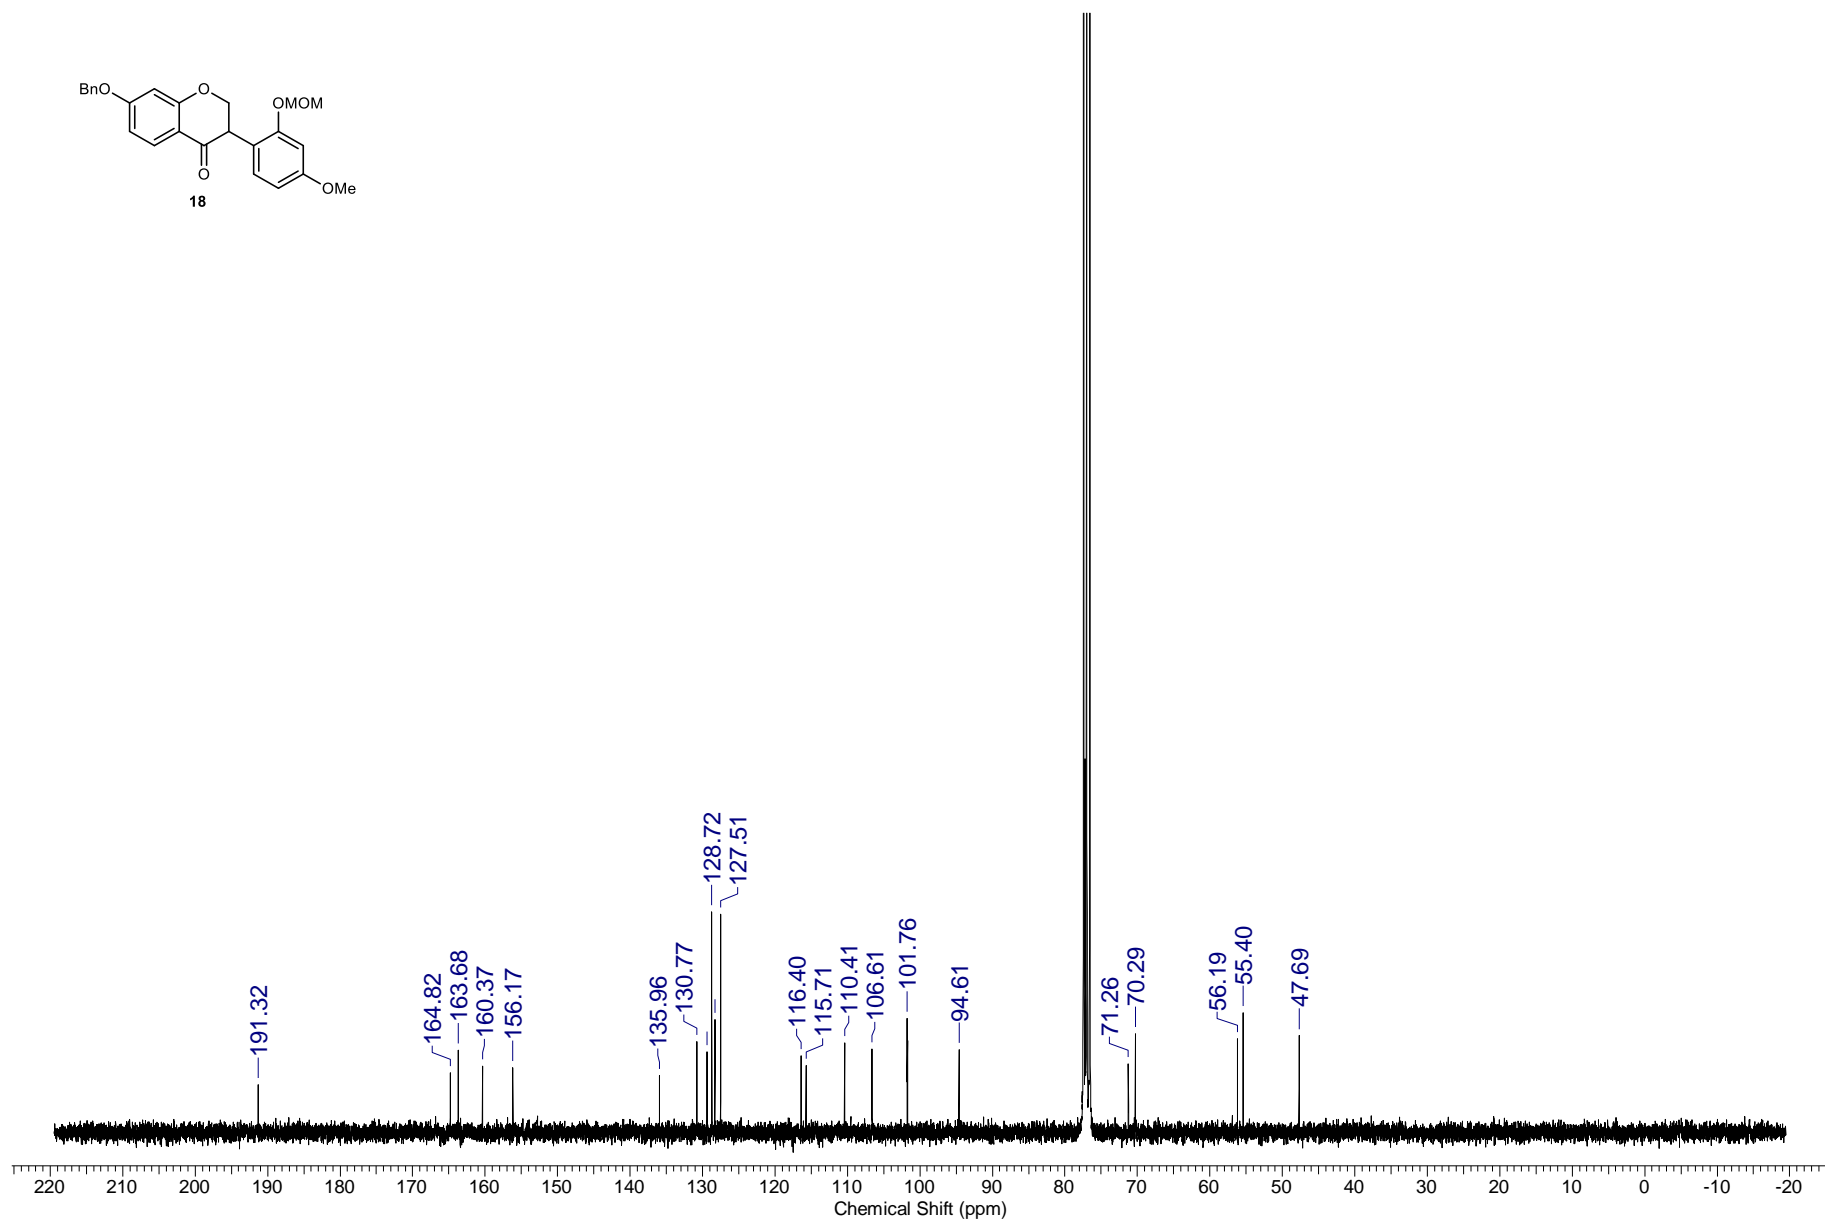

Supplementary Figure 8.  $^{13}\text{C}$  NMR of 18

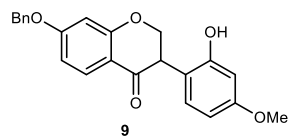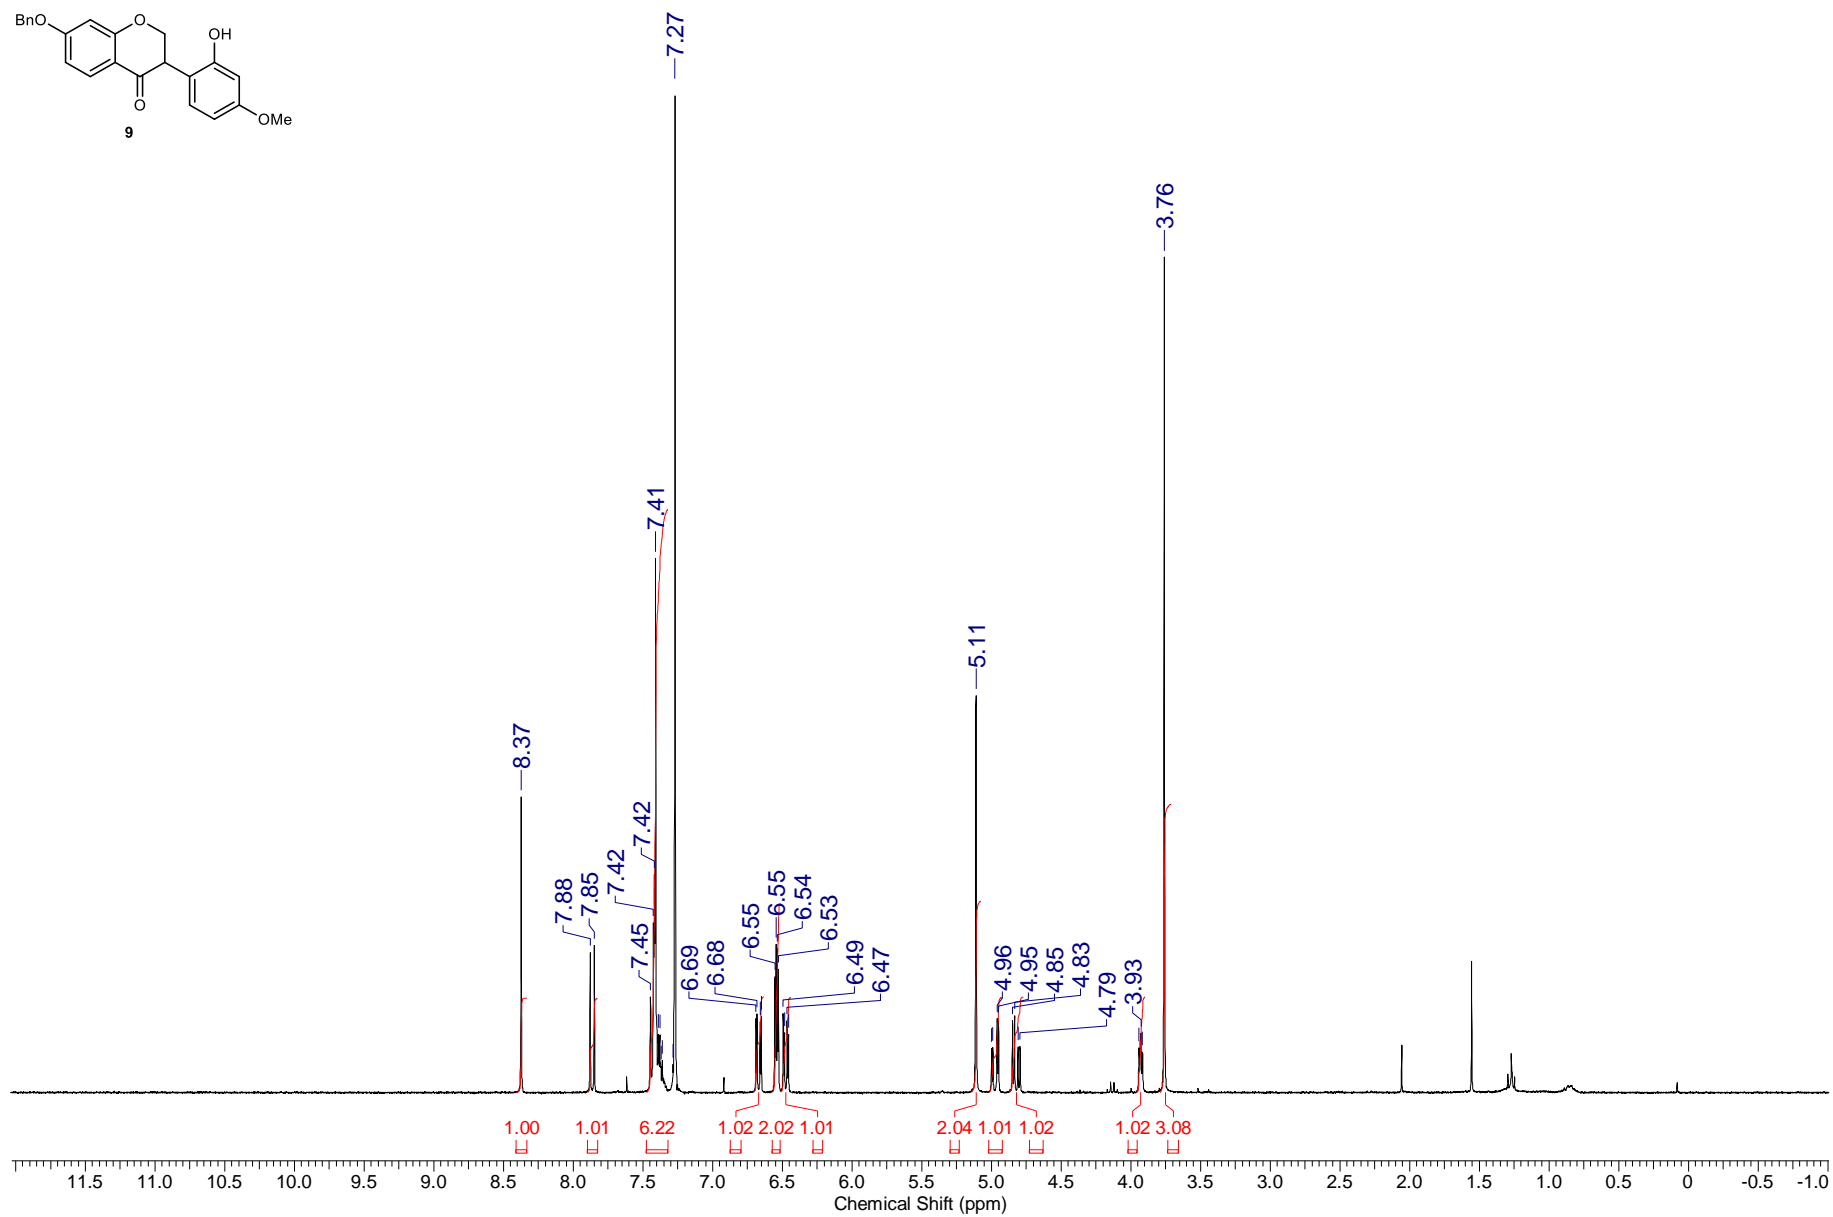

Supplementary Figure 9. <sup>1</sup>H NMR of 9

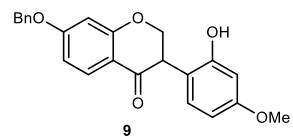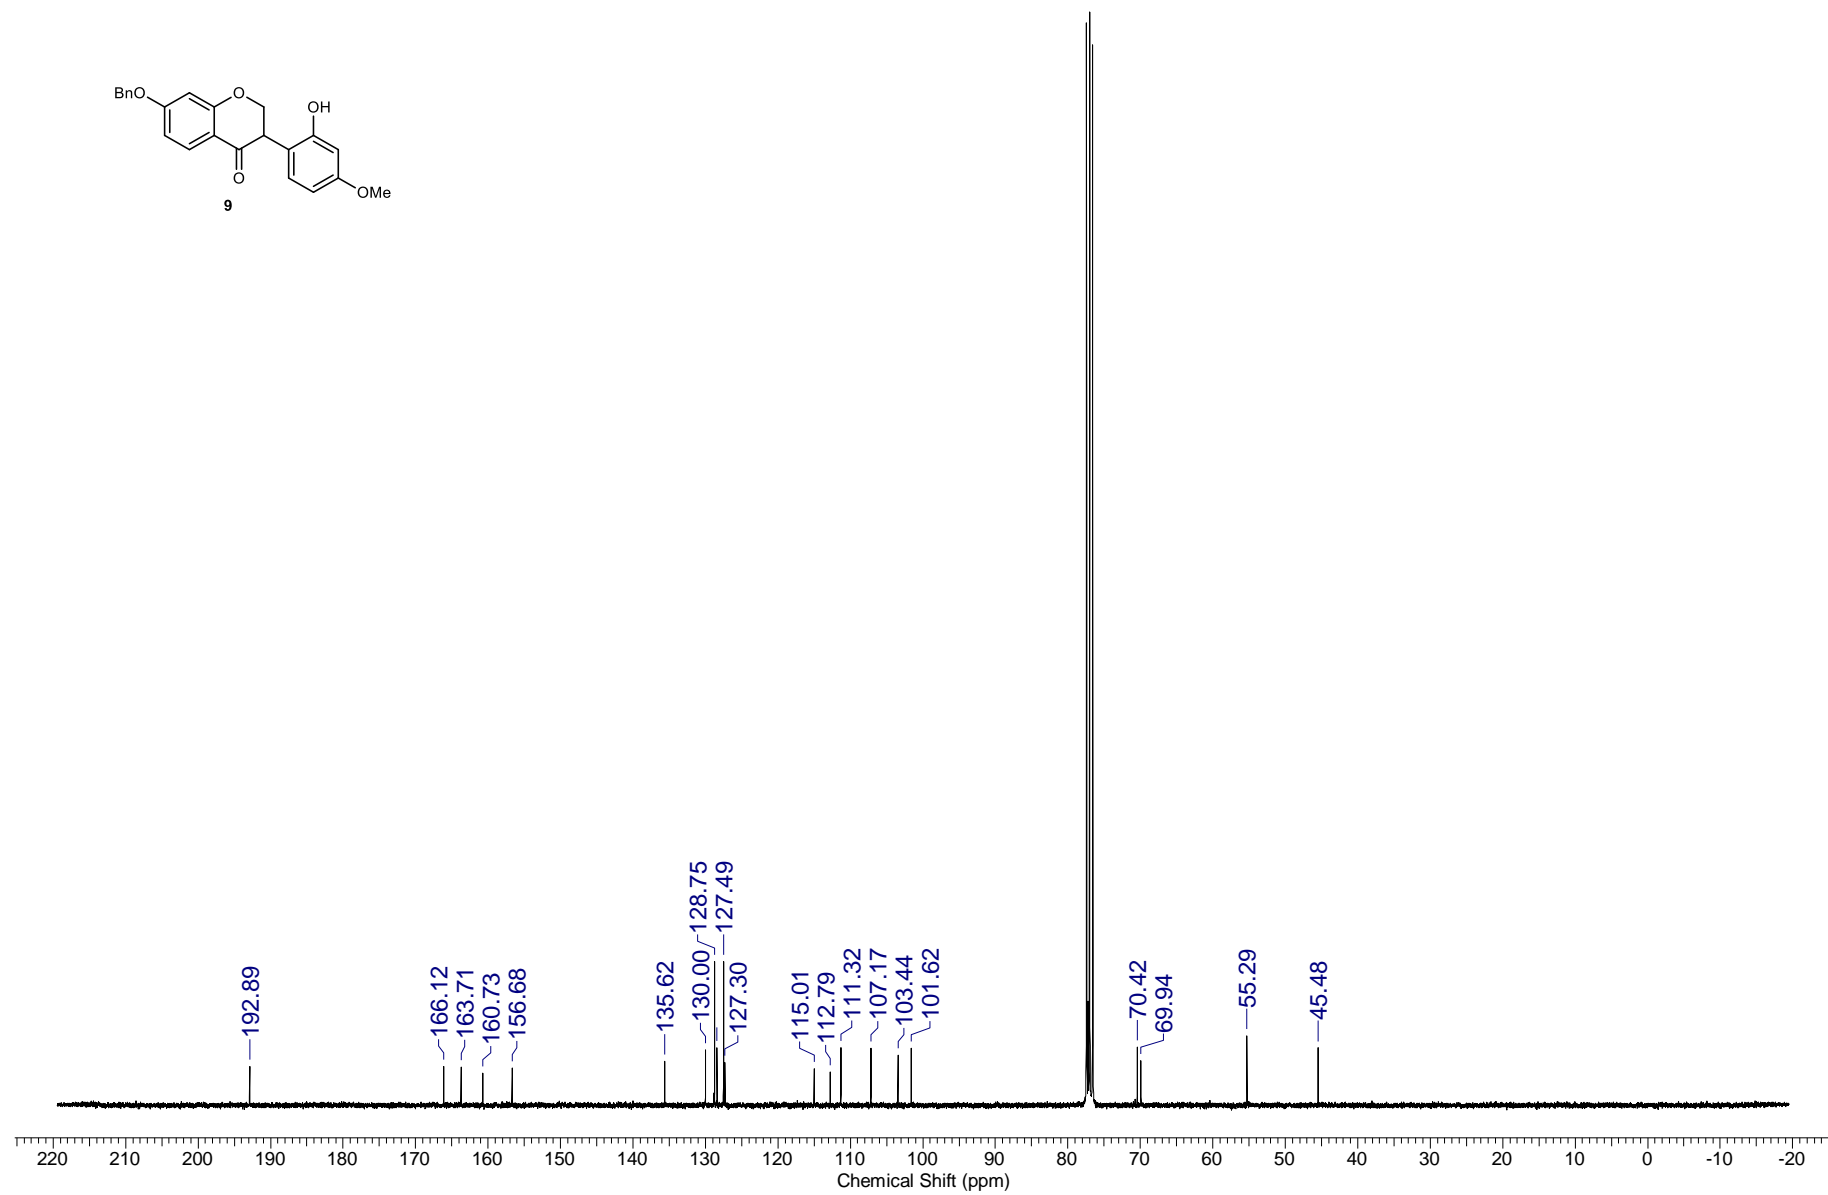

Supplementary Figure 10. <sup>13</sup>C NMR of 9

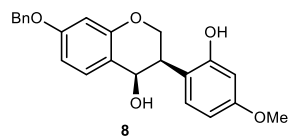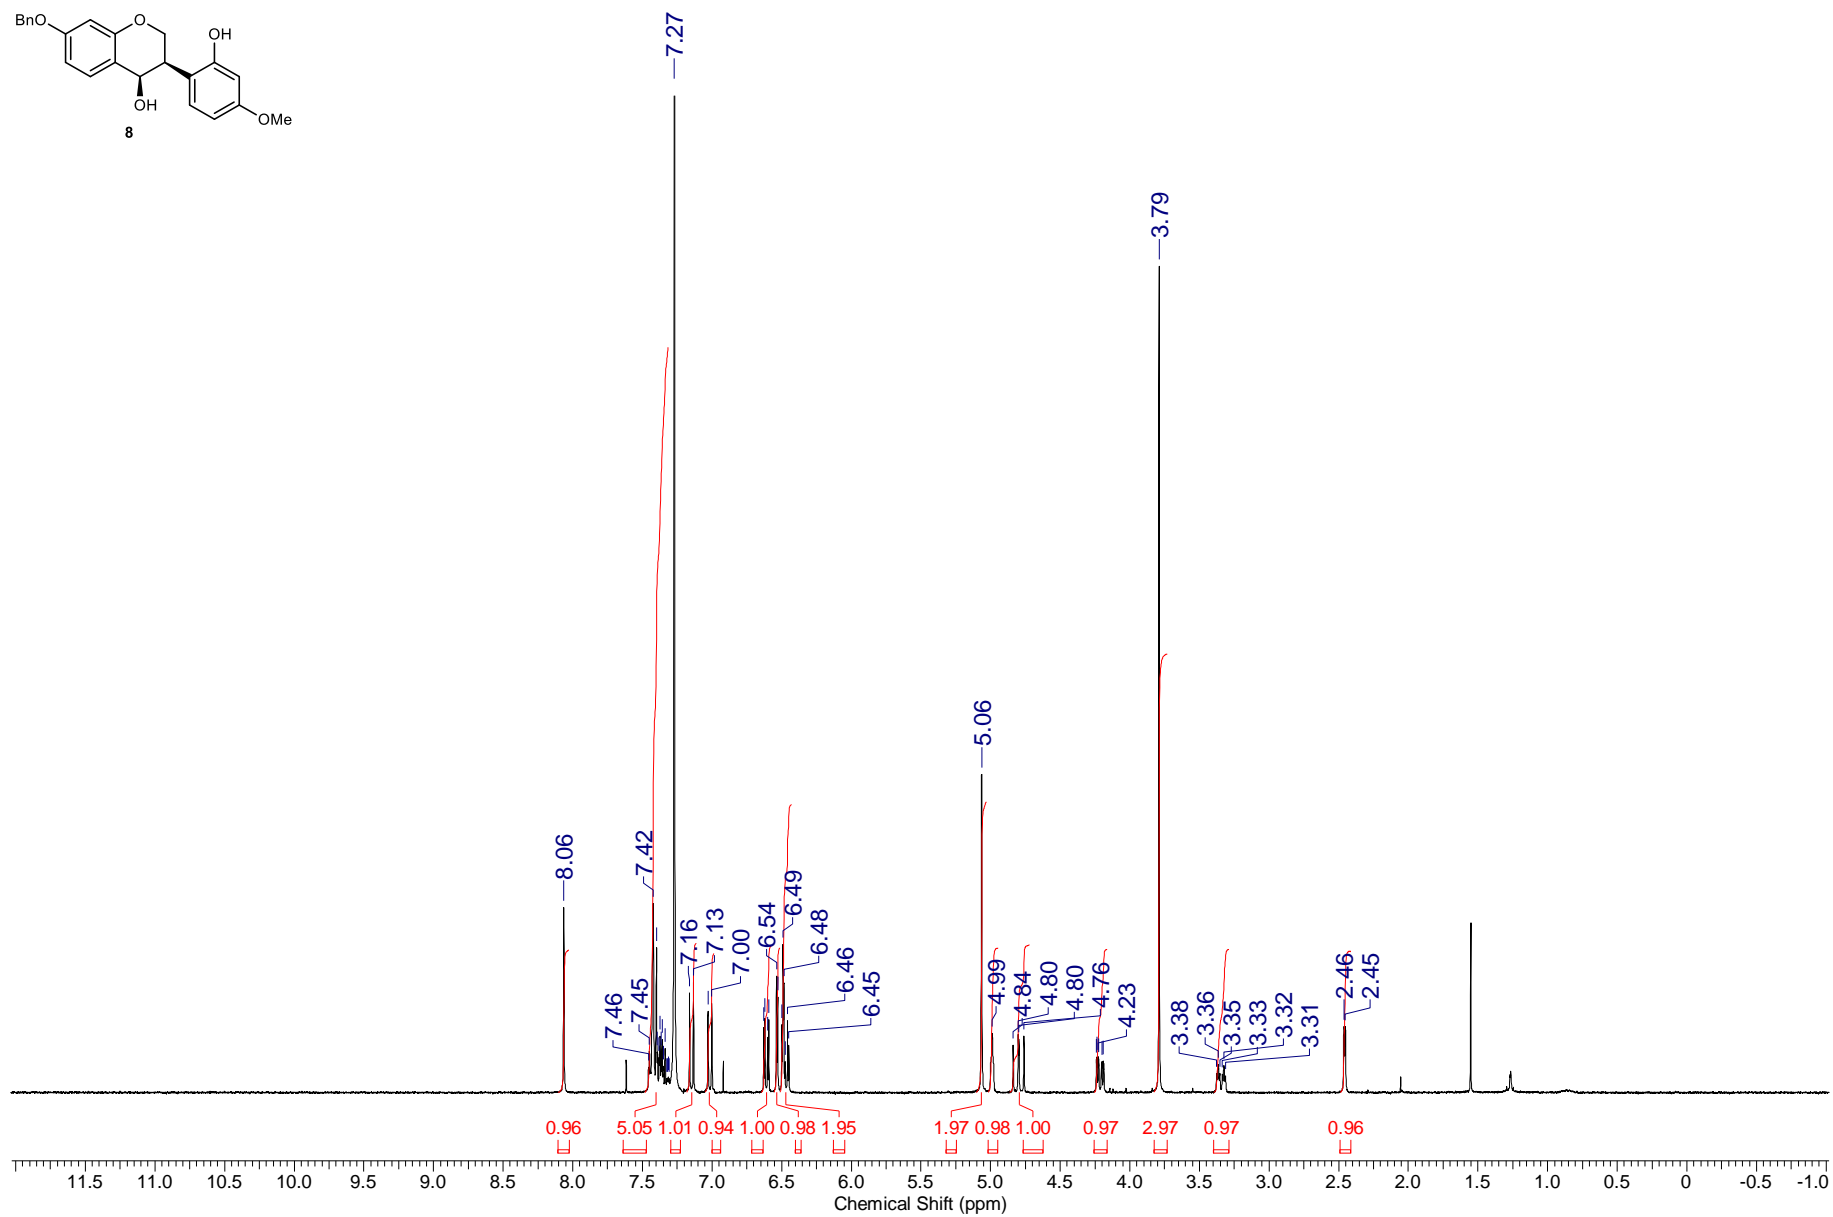

Supplementary Figure 11.  $^1\text{H}$  NMR of 8

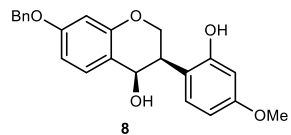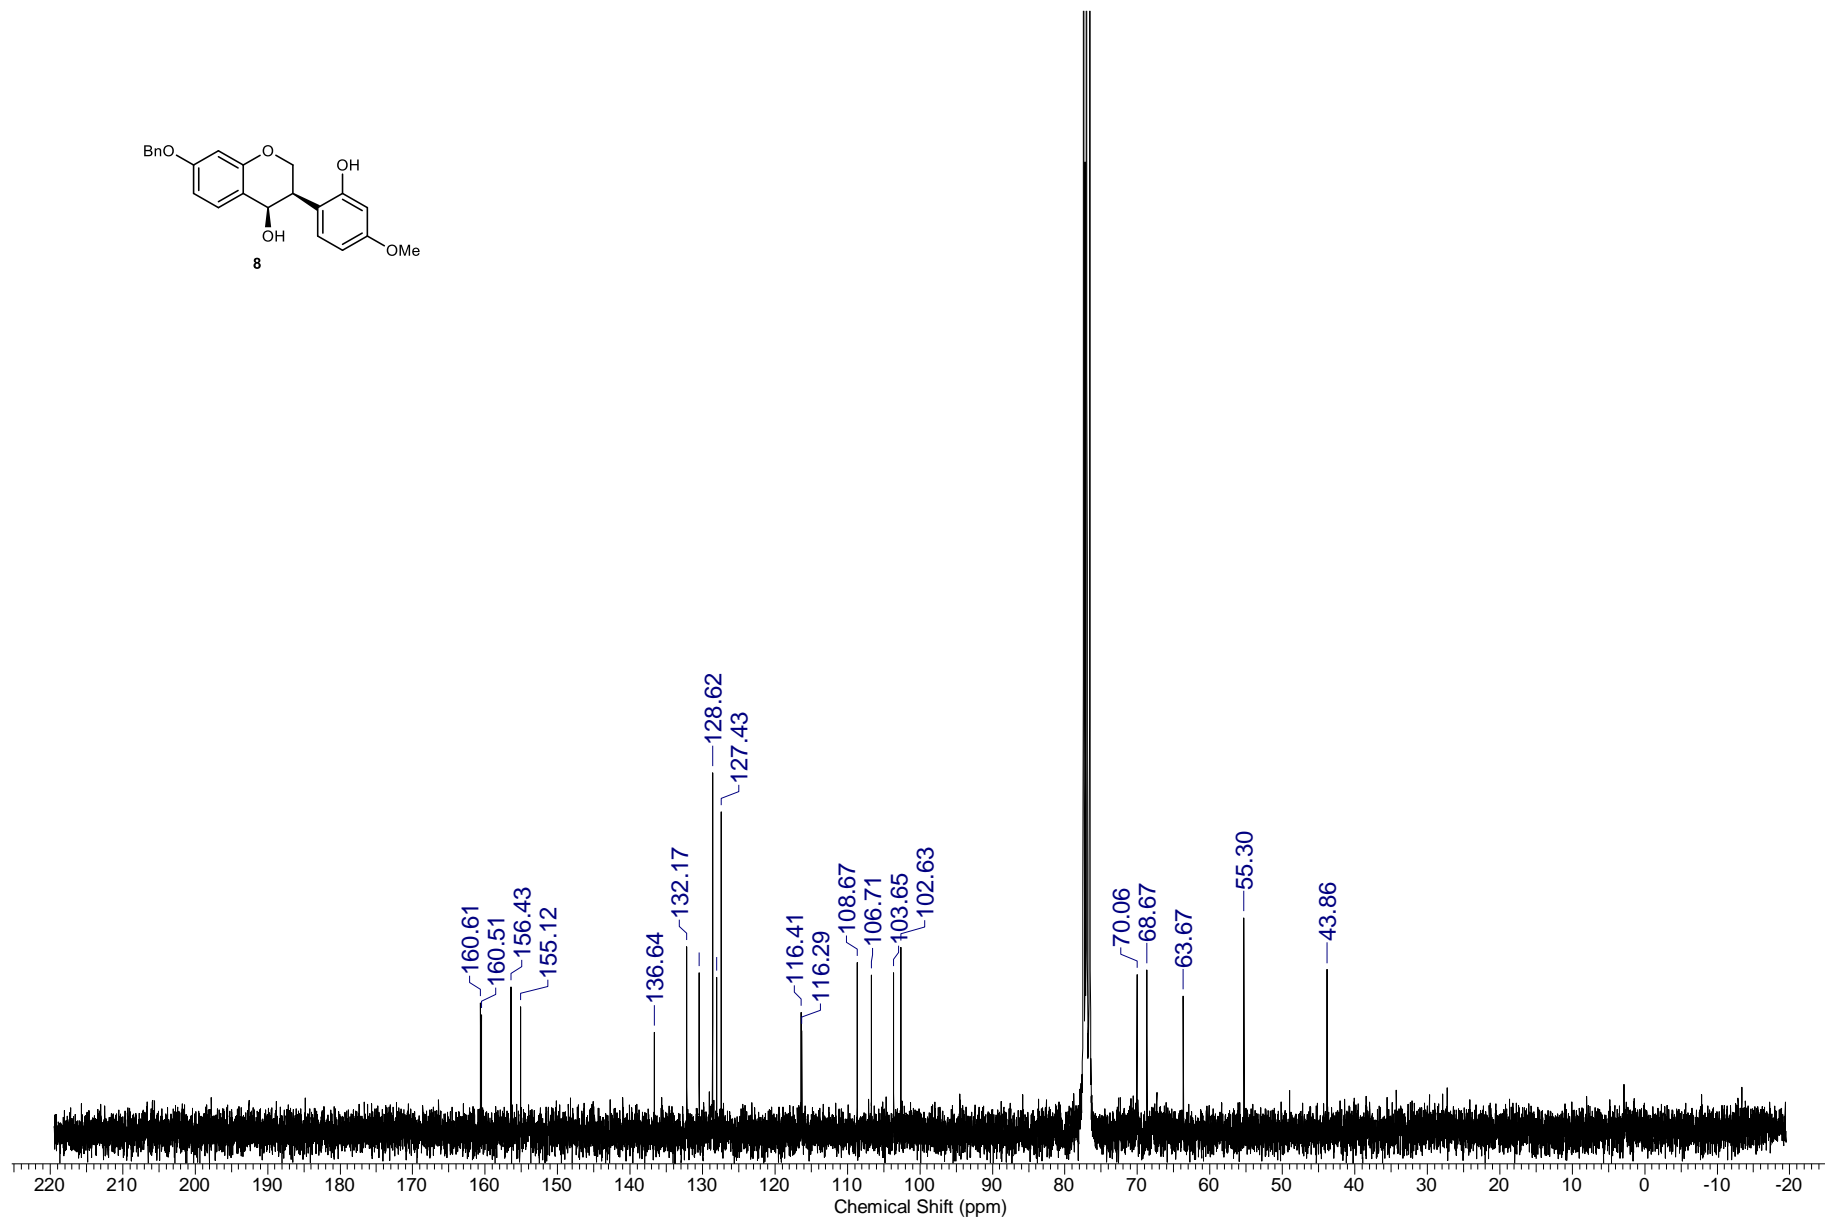

Supplementary Figure 12. <sup>13</sup>C NMR of 8

Chiral HPLC trace of *rac*-**8** (bottom) and (*R,R*)-**8** (top, >99% *ee*); Method: Lux Amylose-1, hexane:isopropanol 70:30 v/v, 0.8 mL/min

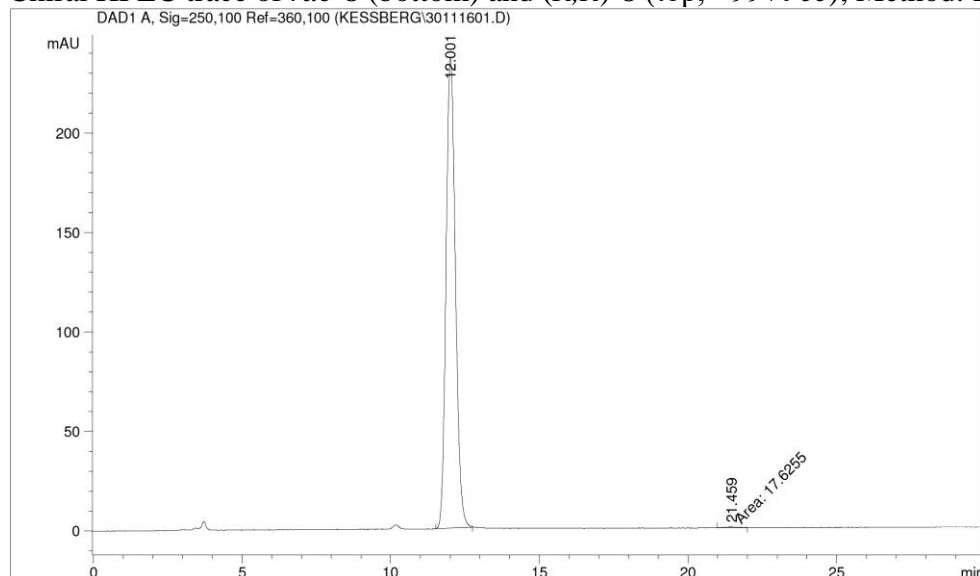

| Peak # | RetTime [min] | Type | Width [min] | Area [mAU*s] | Height [mAU] | Area %  |
|--------|---------------|------|-------------|--------------|--------------|---------|
| 1      | 12.001        | BB   | 0.3396      | 5171.82568   | 236.10640    | 99.6604 |
| 2      | 21.459        | MM T | 0.6350      | 17.62548     | 4.62577e-1   | 0.3396  |

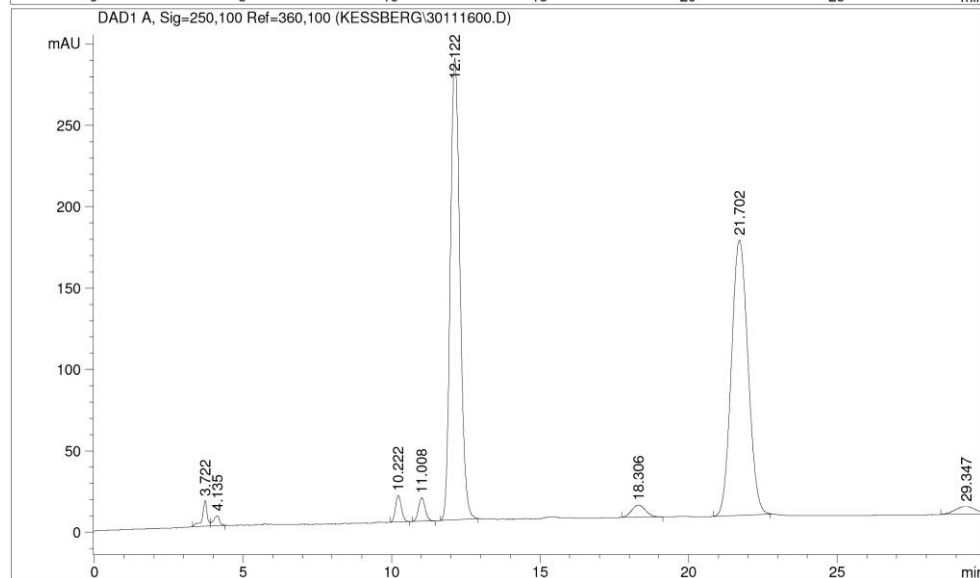

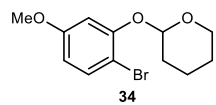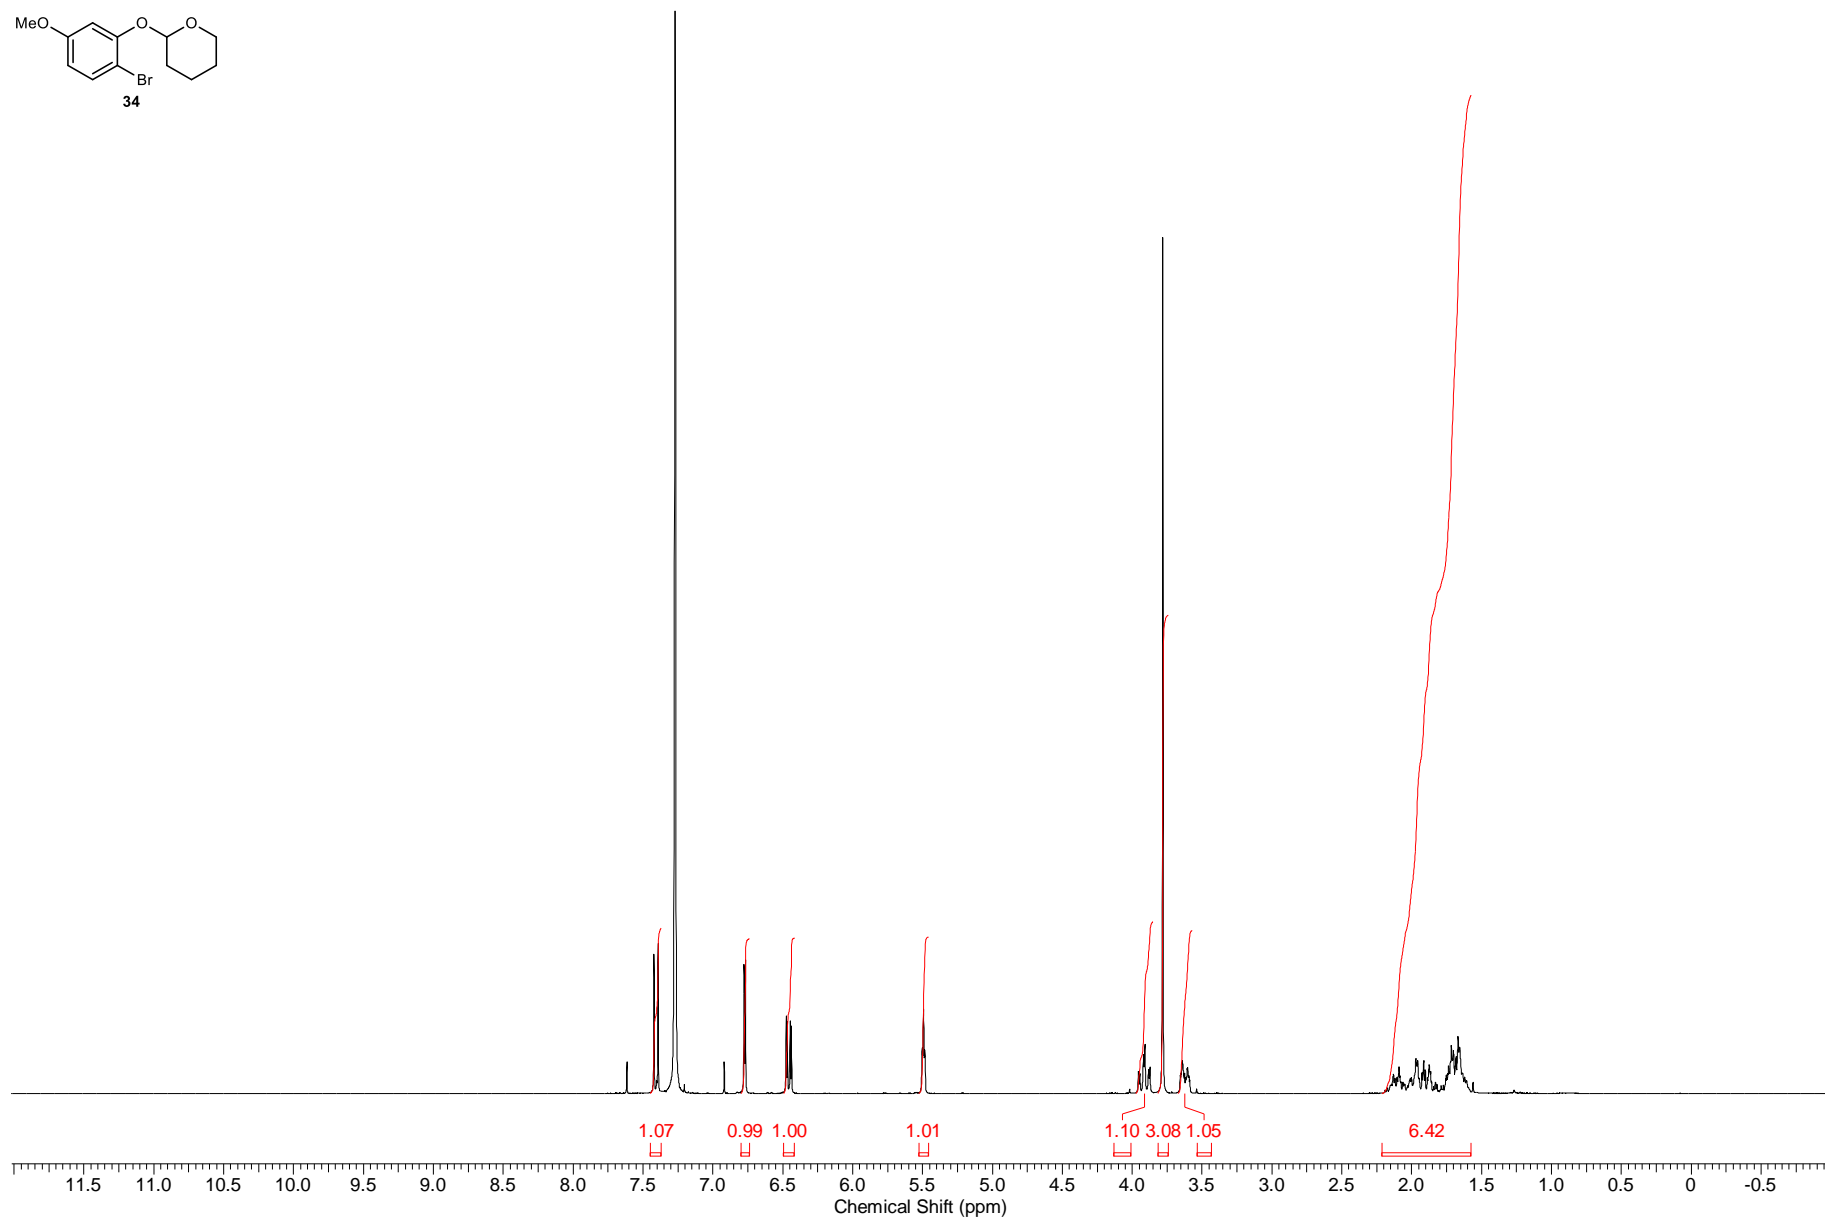

Supplementary Figure 14.  $^1\text{H}$  NMR of 34



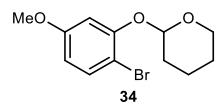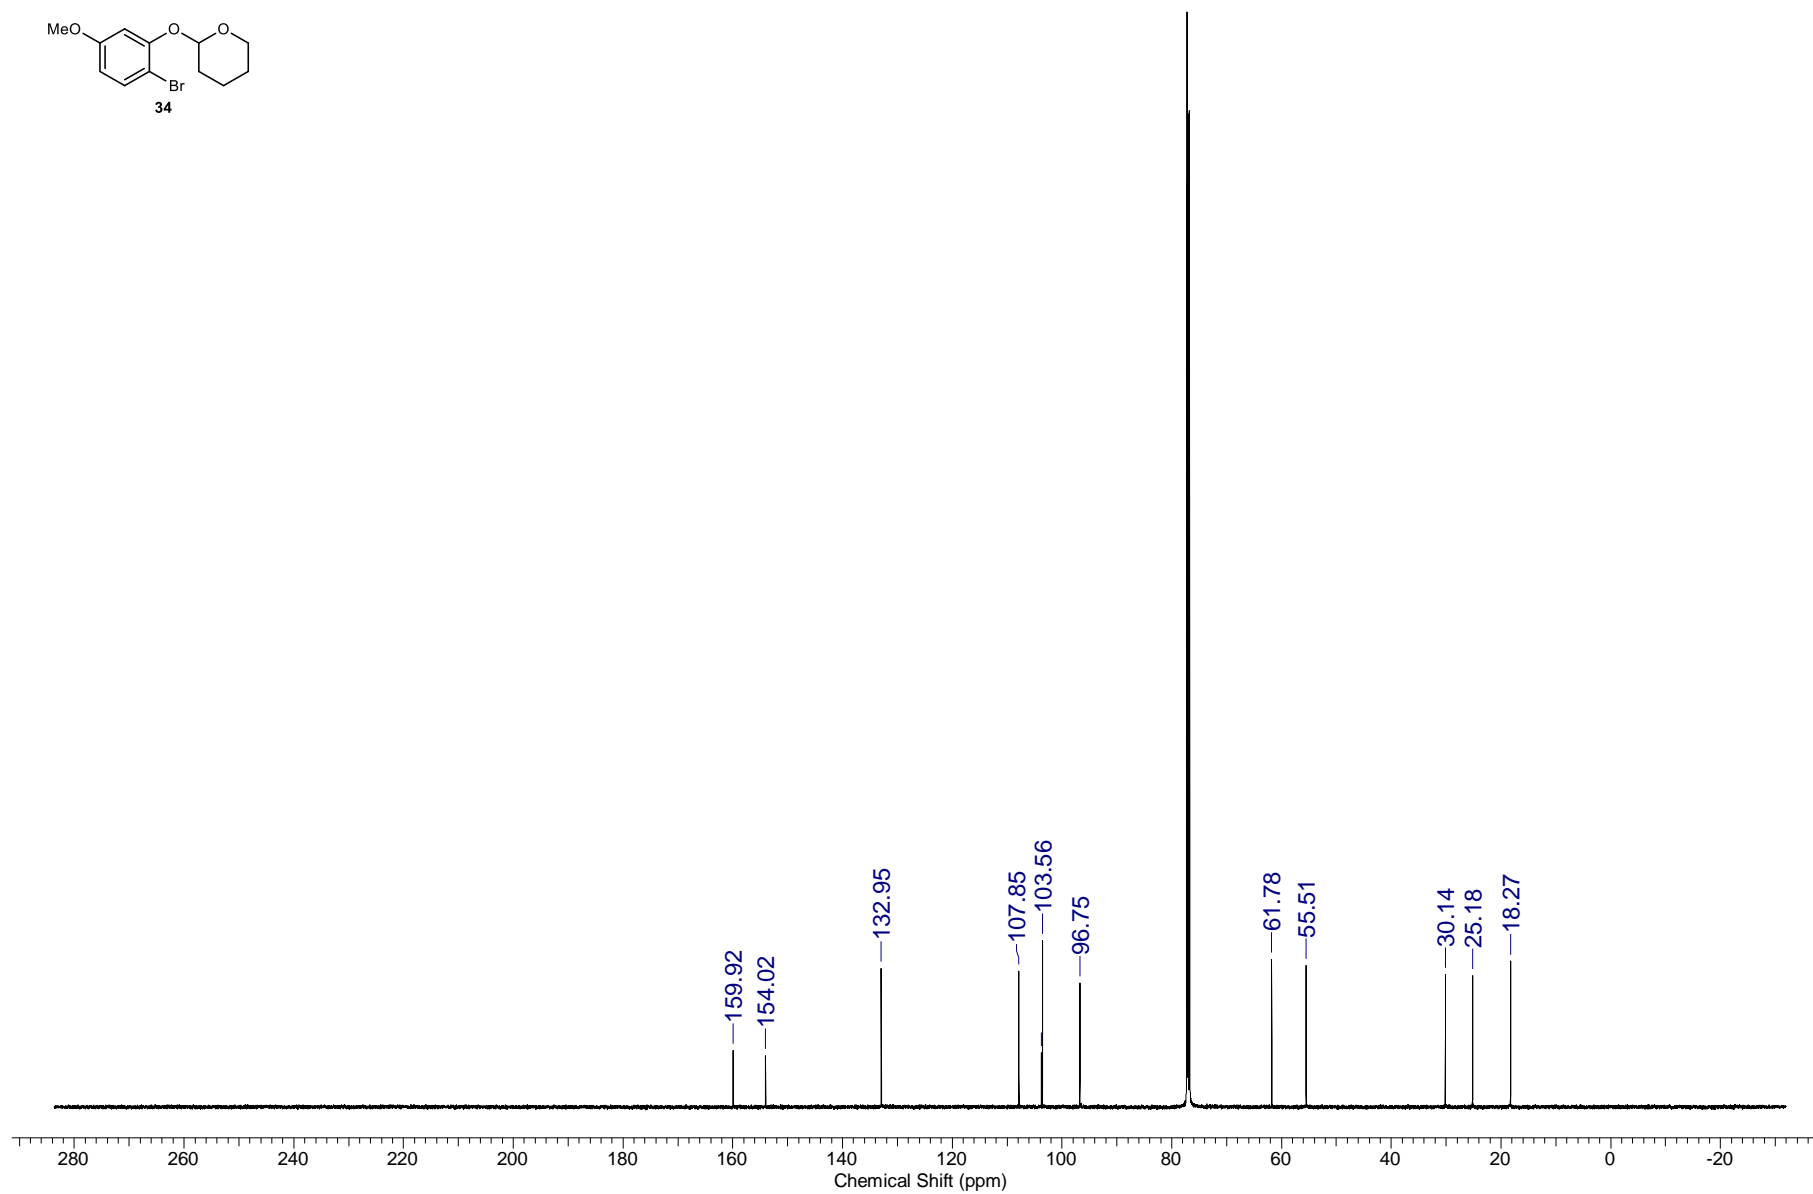

Supplementary Figure 15.  $^{13}\text{C}$  NMR of 34

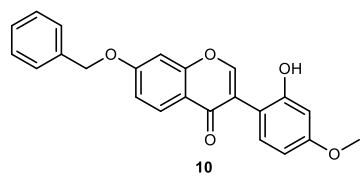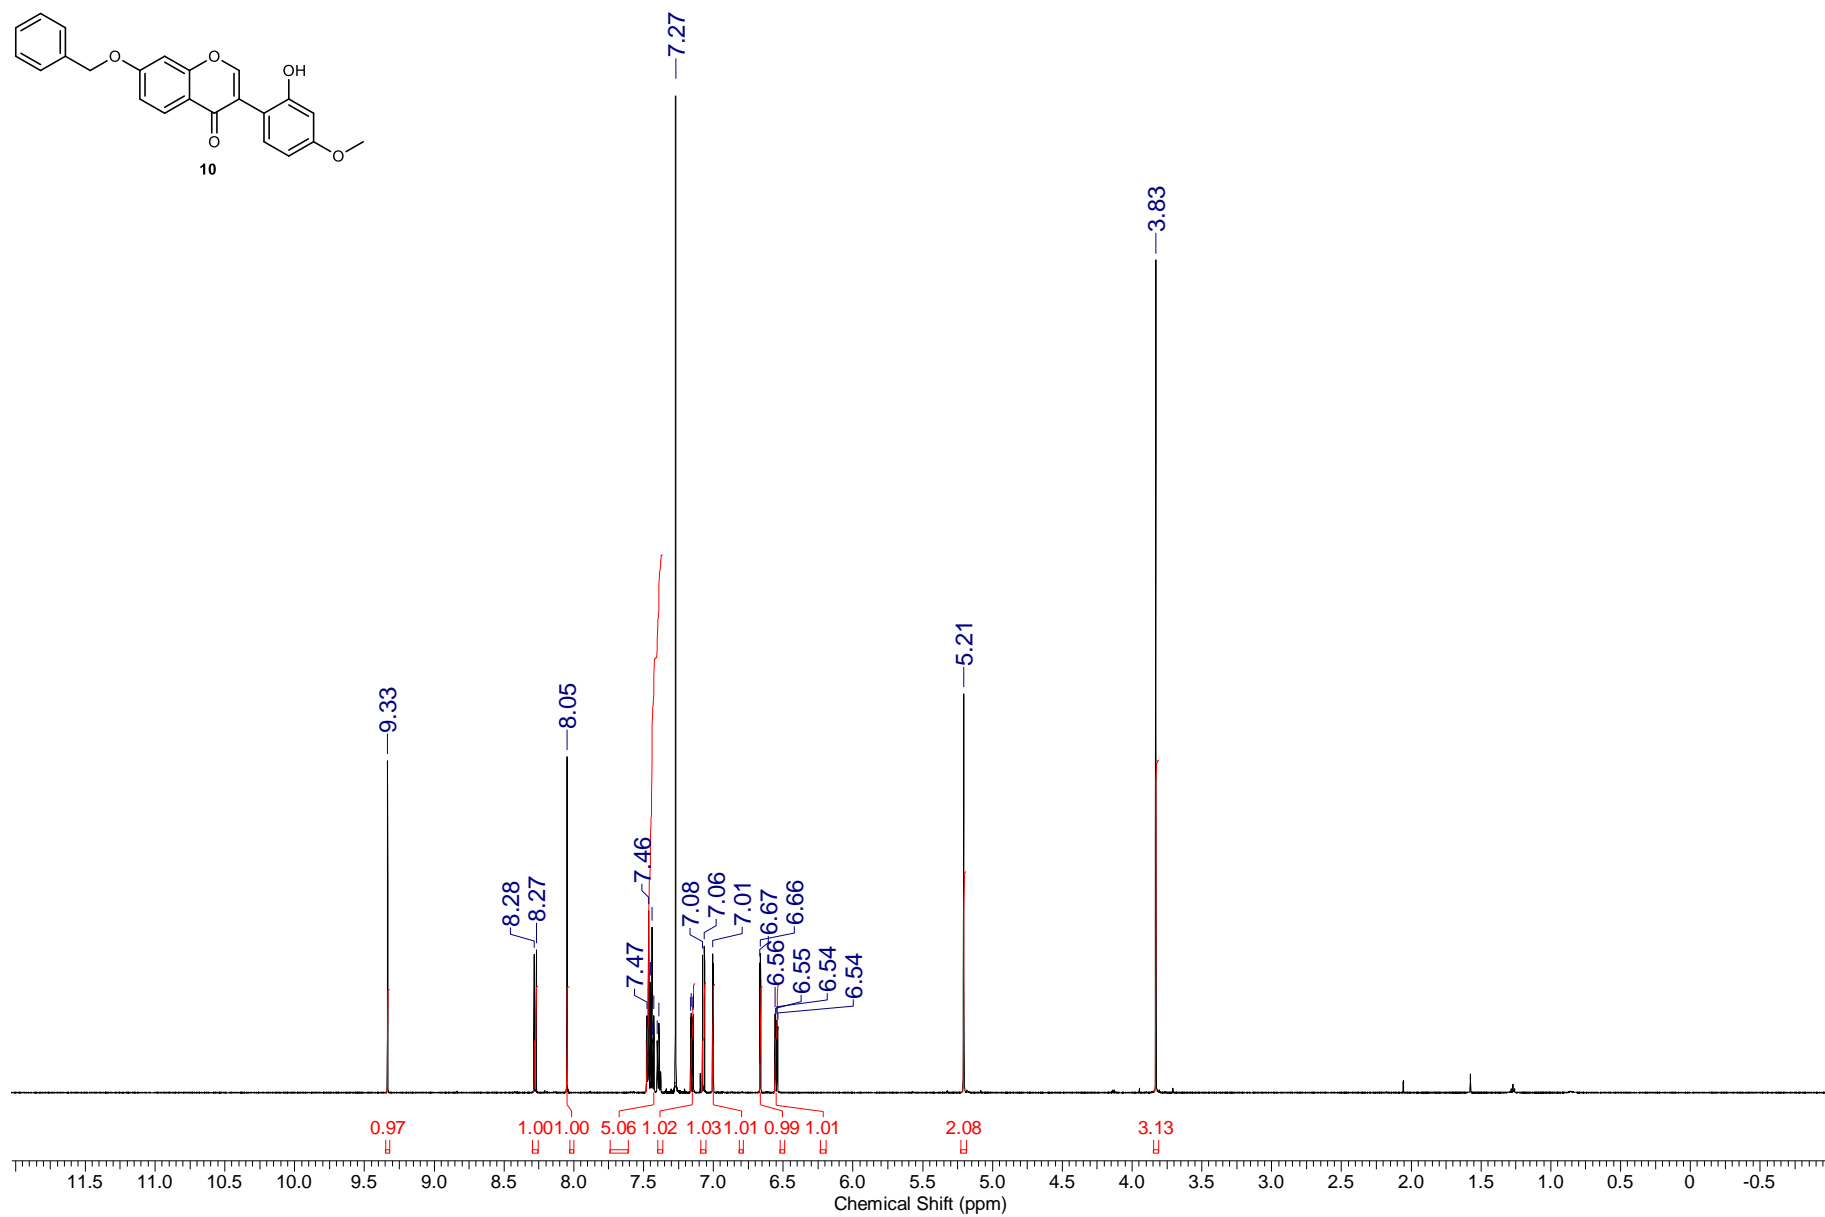

Supplementary Figure 16.  $^1\text{H}$  NMR of 10

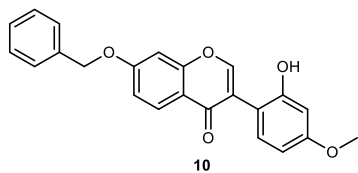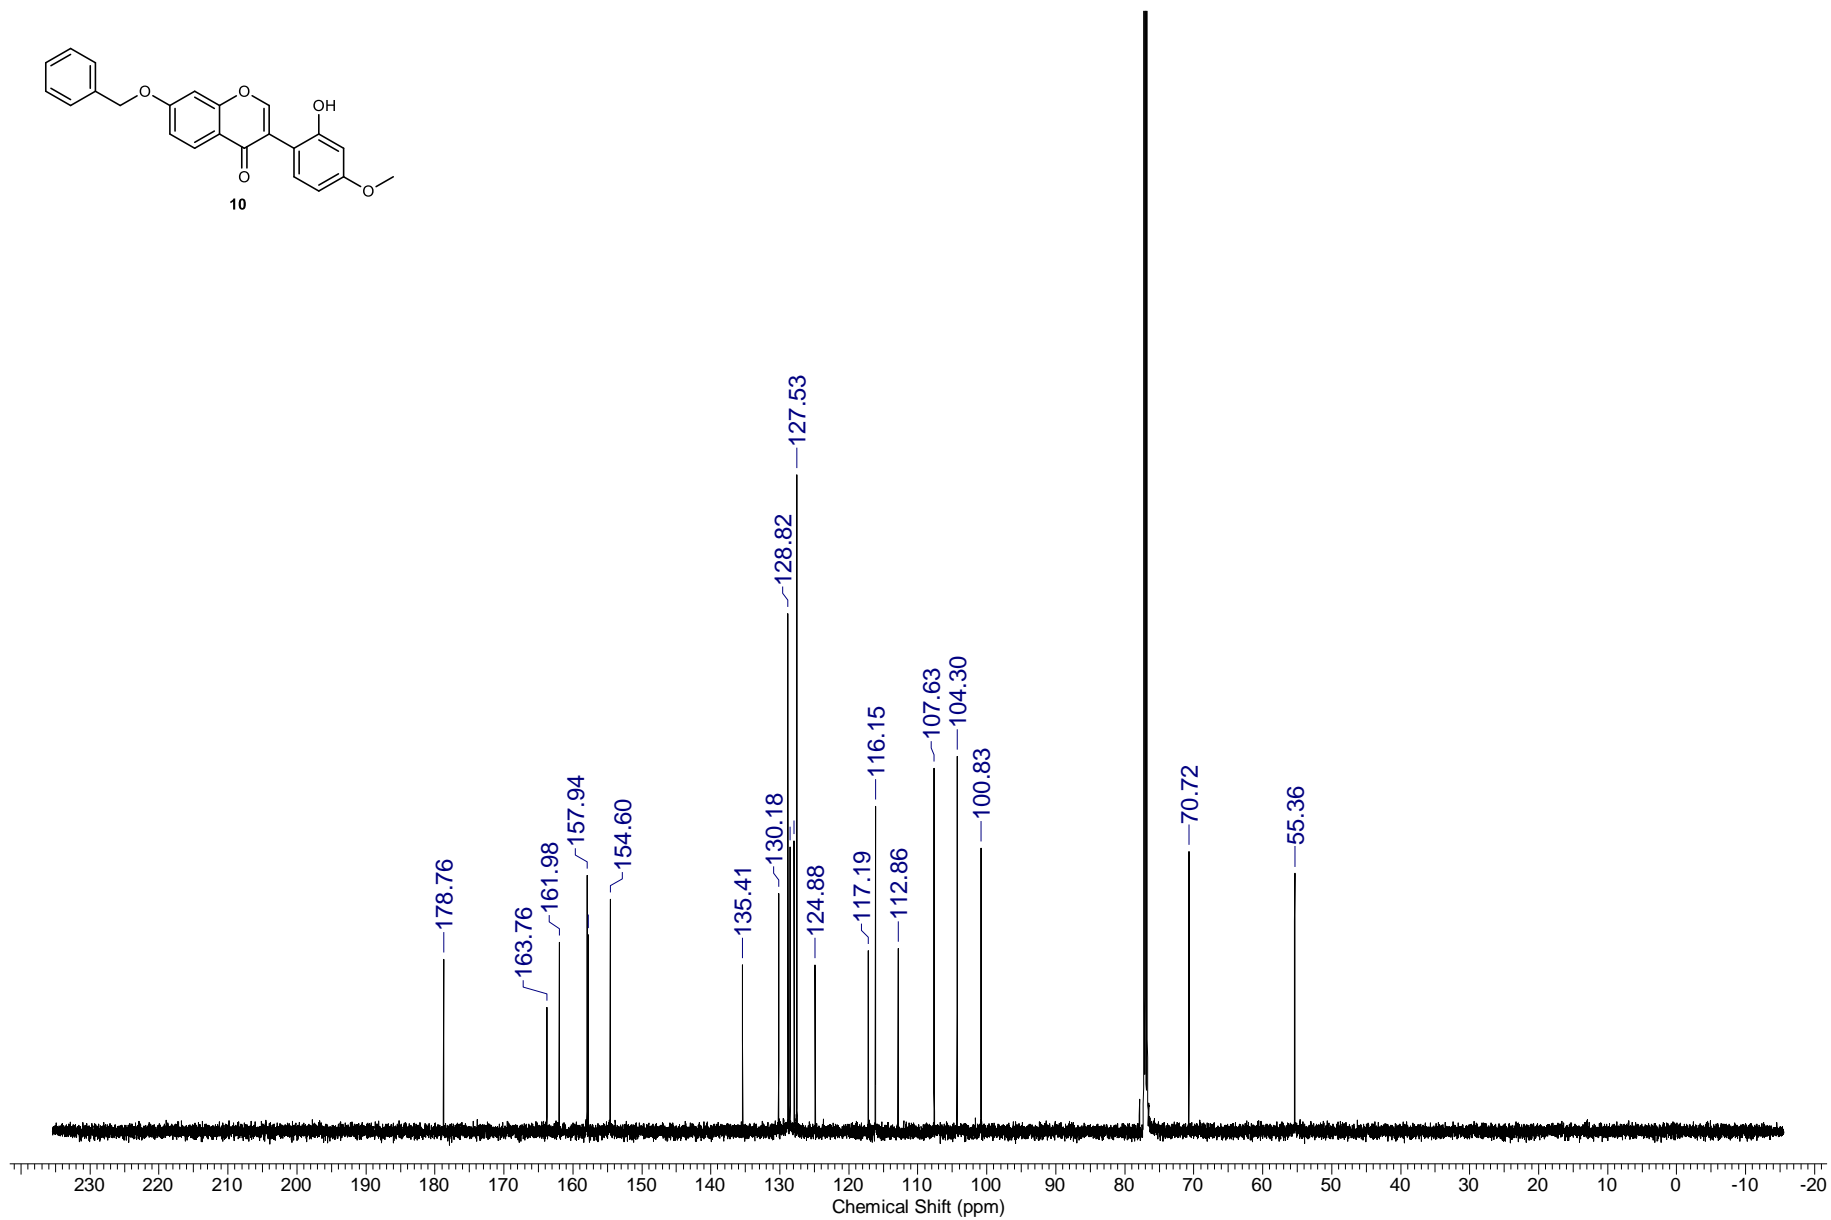

Supplementary Figure 17.  $^{13}\text{C}$  NMR of 10

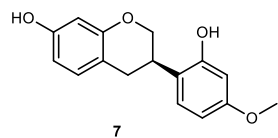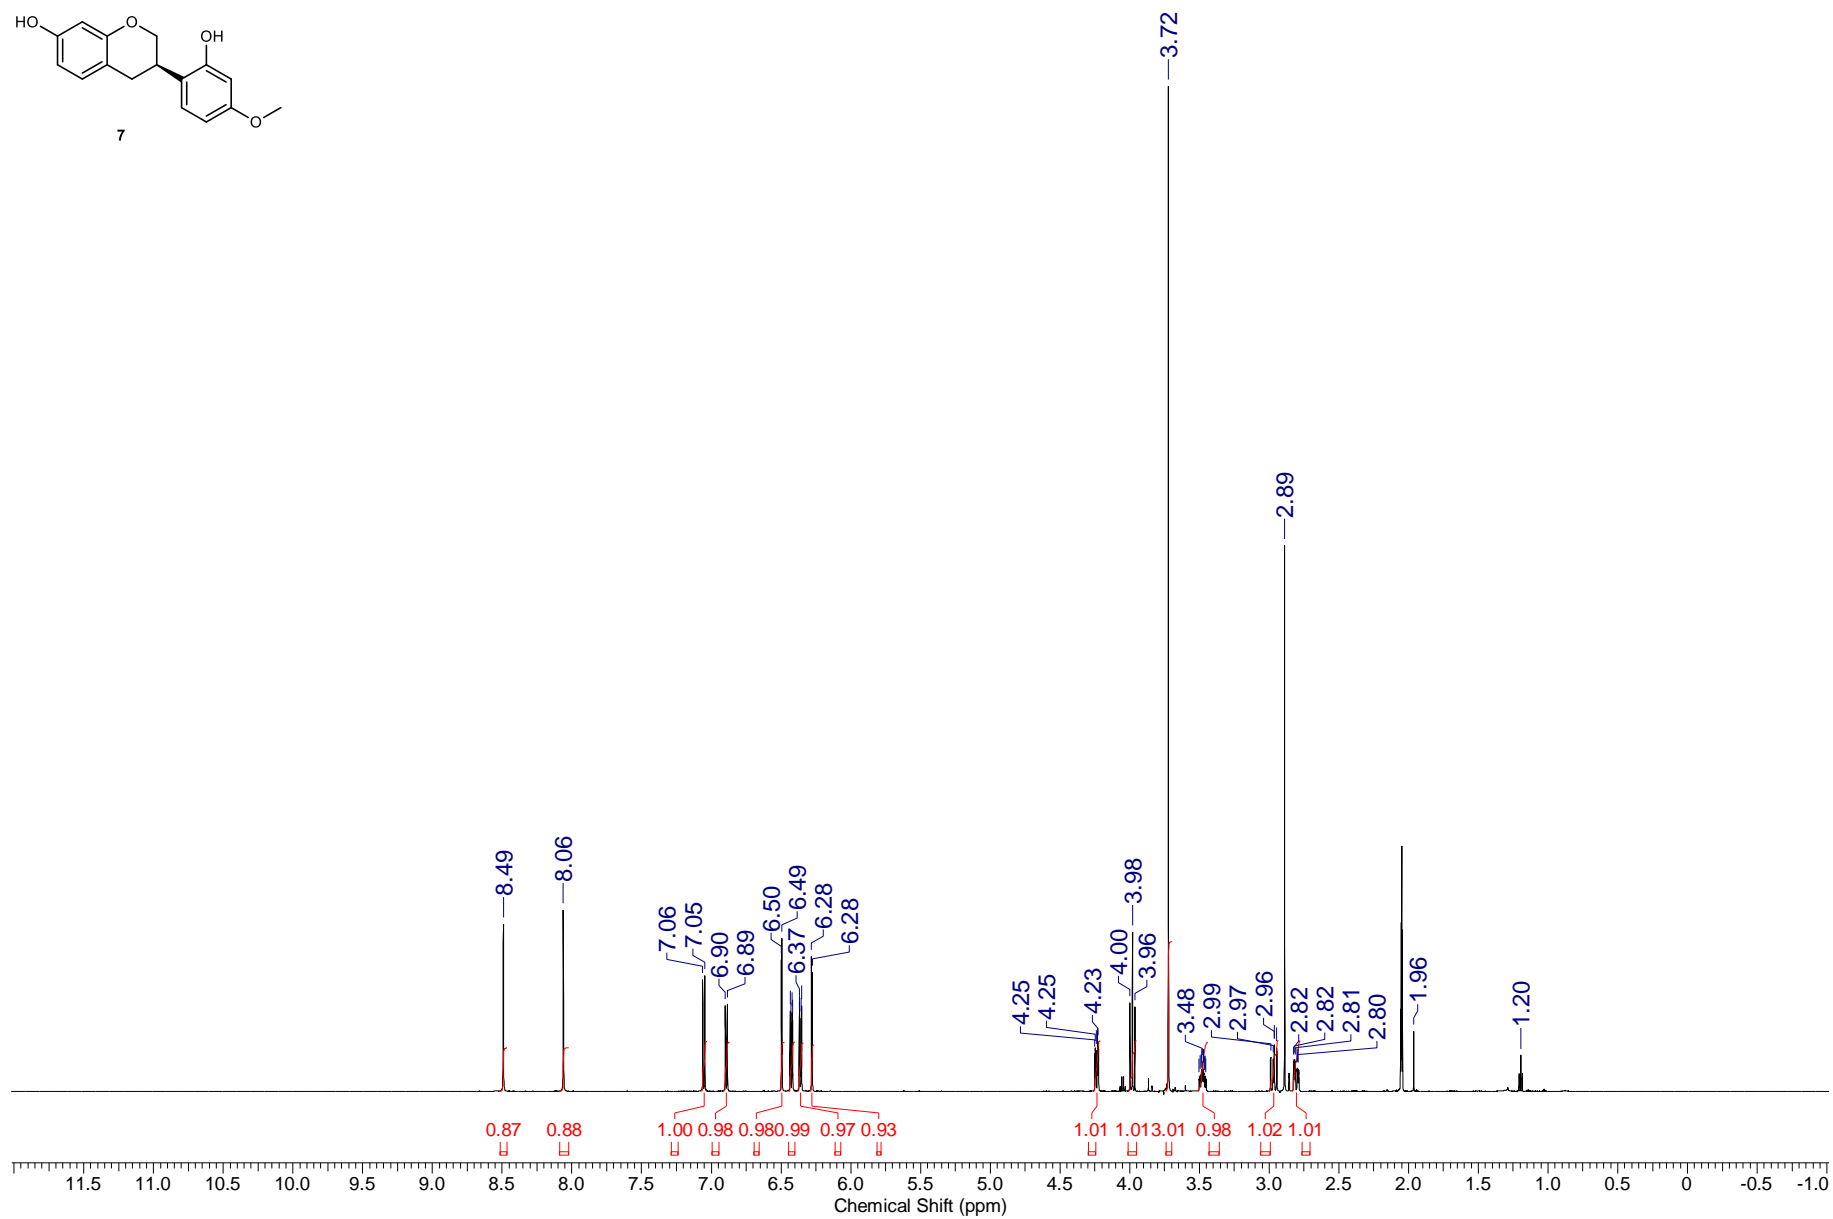

Supplementary Figure 18.  $^1\text{H}$  NMR of 7

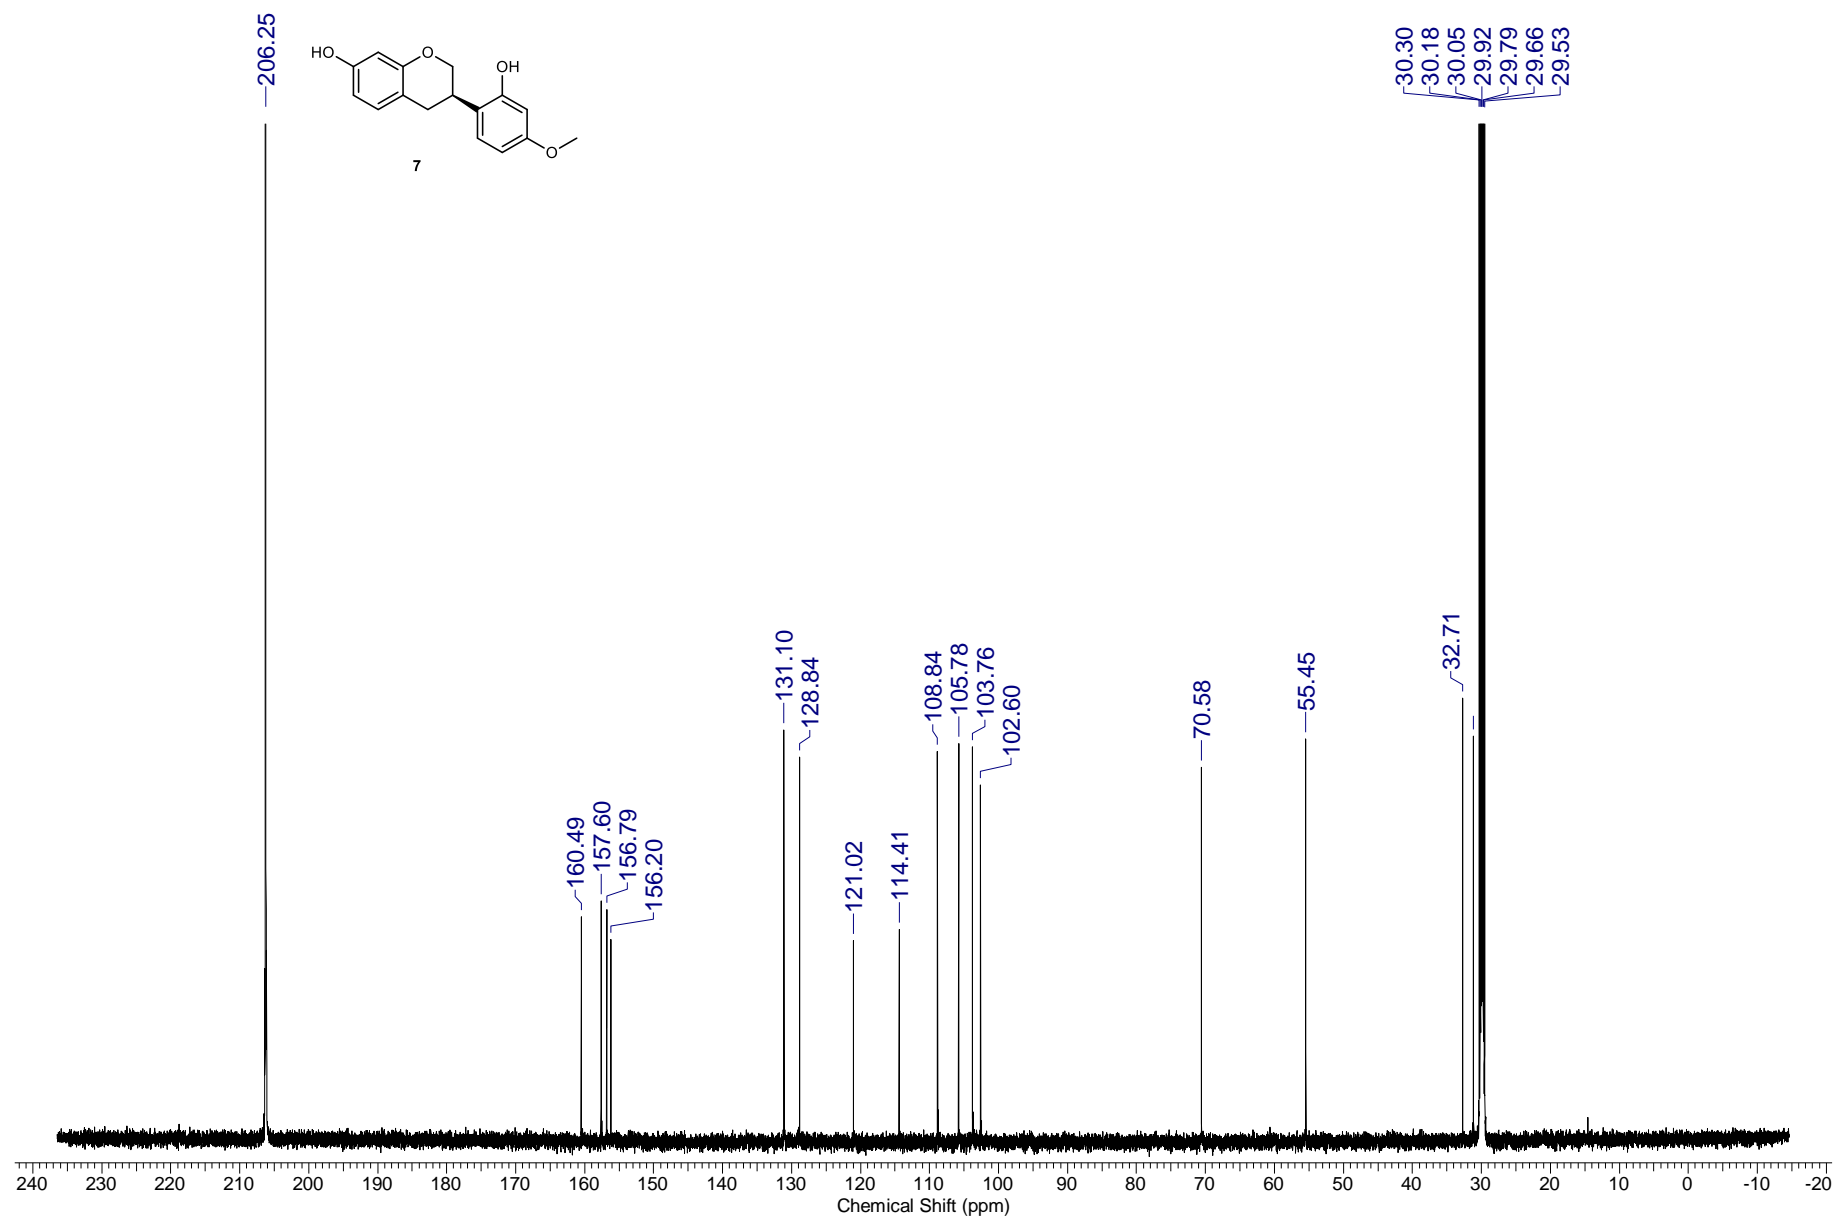

Supplementary Figure 19. <sup>13</sup>C NMR of 7

Chiral HPLC trace of *rac*-**7** (bottom) and (*R*)-**7** (top, 97% *ee*); Method: Lux<sup>®</sup> Cellulose-1, hexane:isopropanol 80:20 v/v, 0.7 mL/min

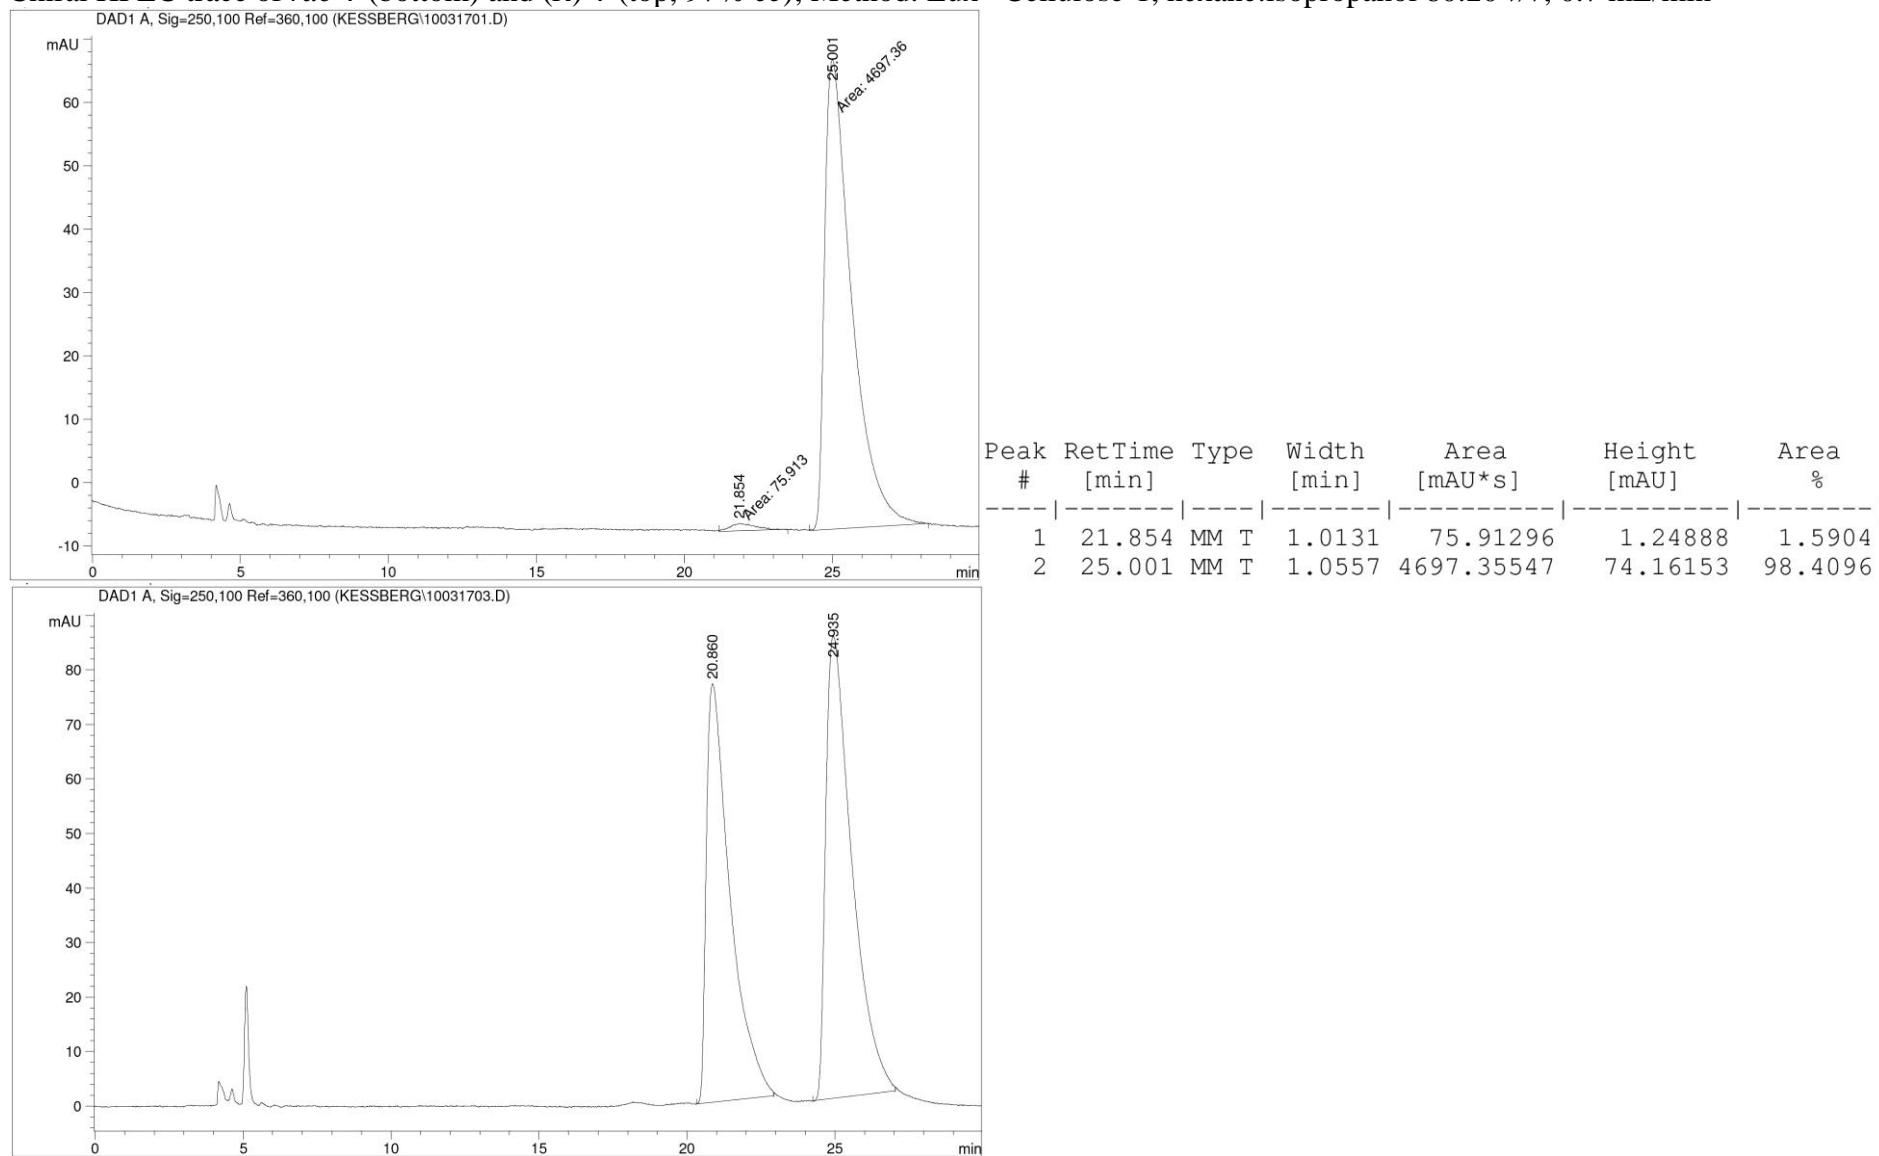

Supplementary Figure 20. Chiral HPLC trace of **7**

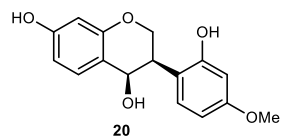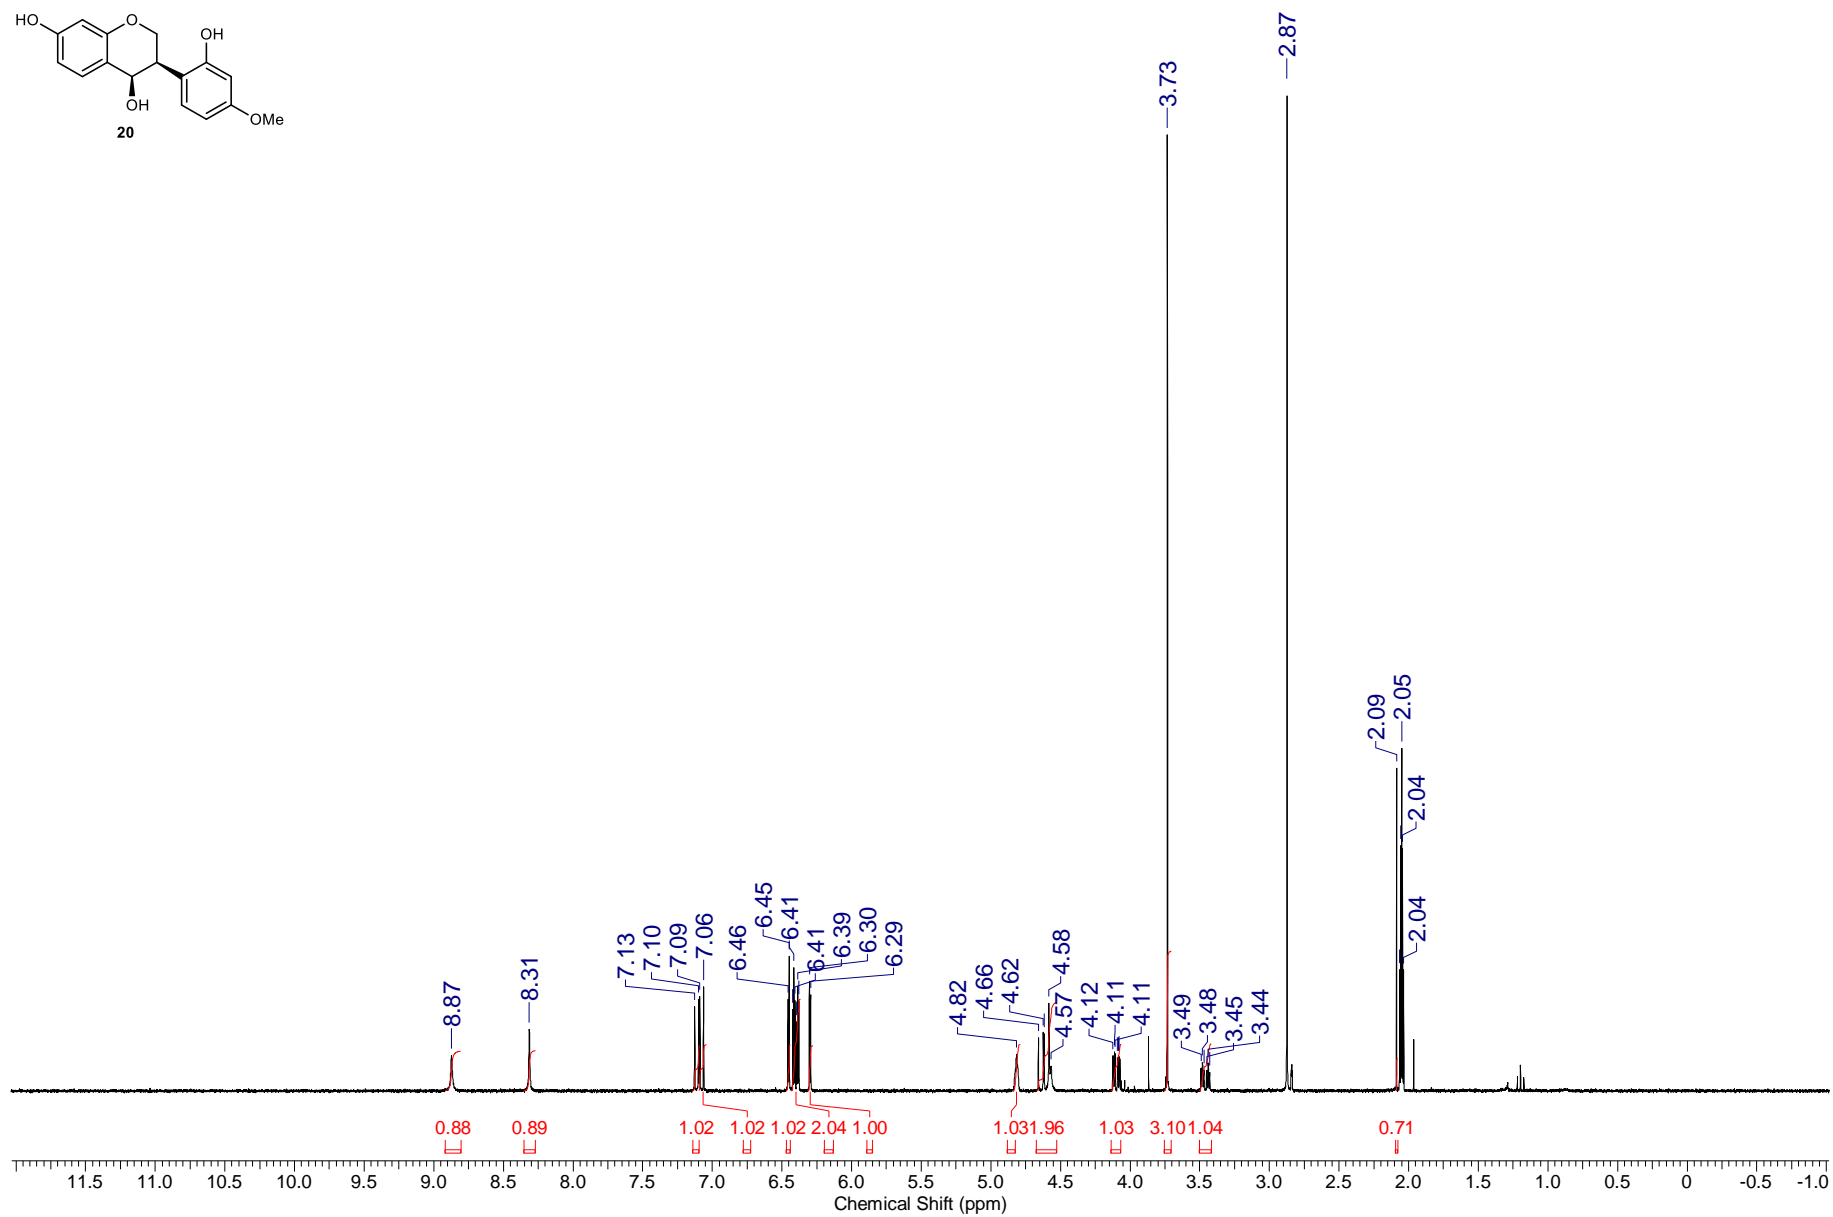

Supplementary Figure 21. <sup>1</sup>H NMR of 20

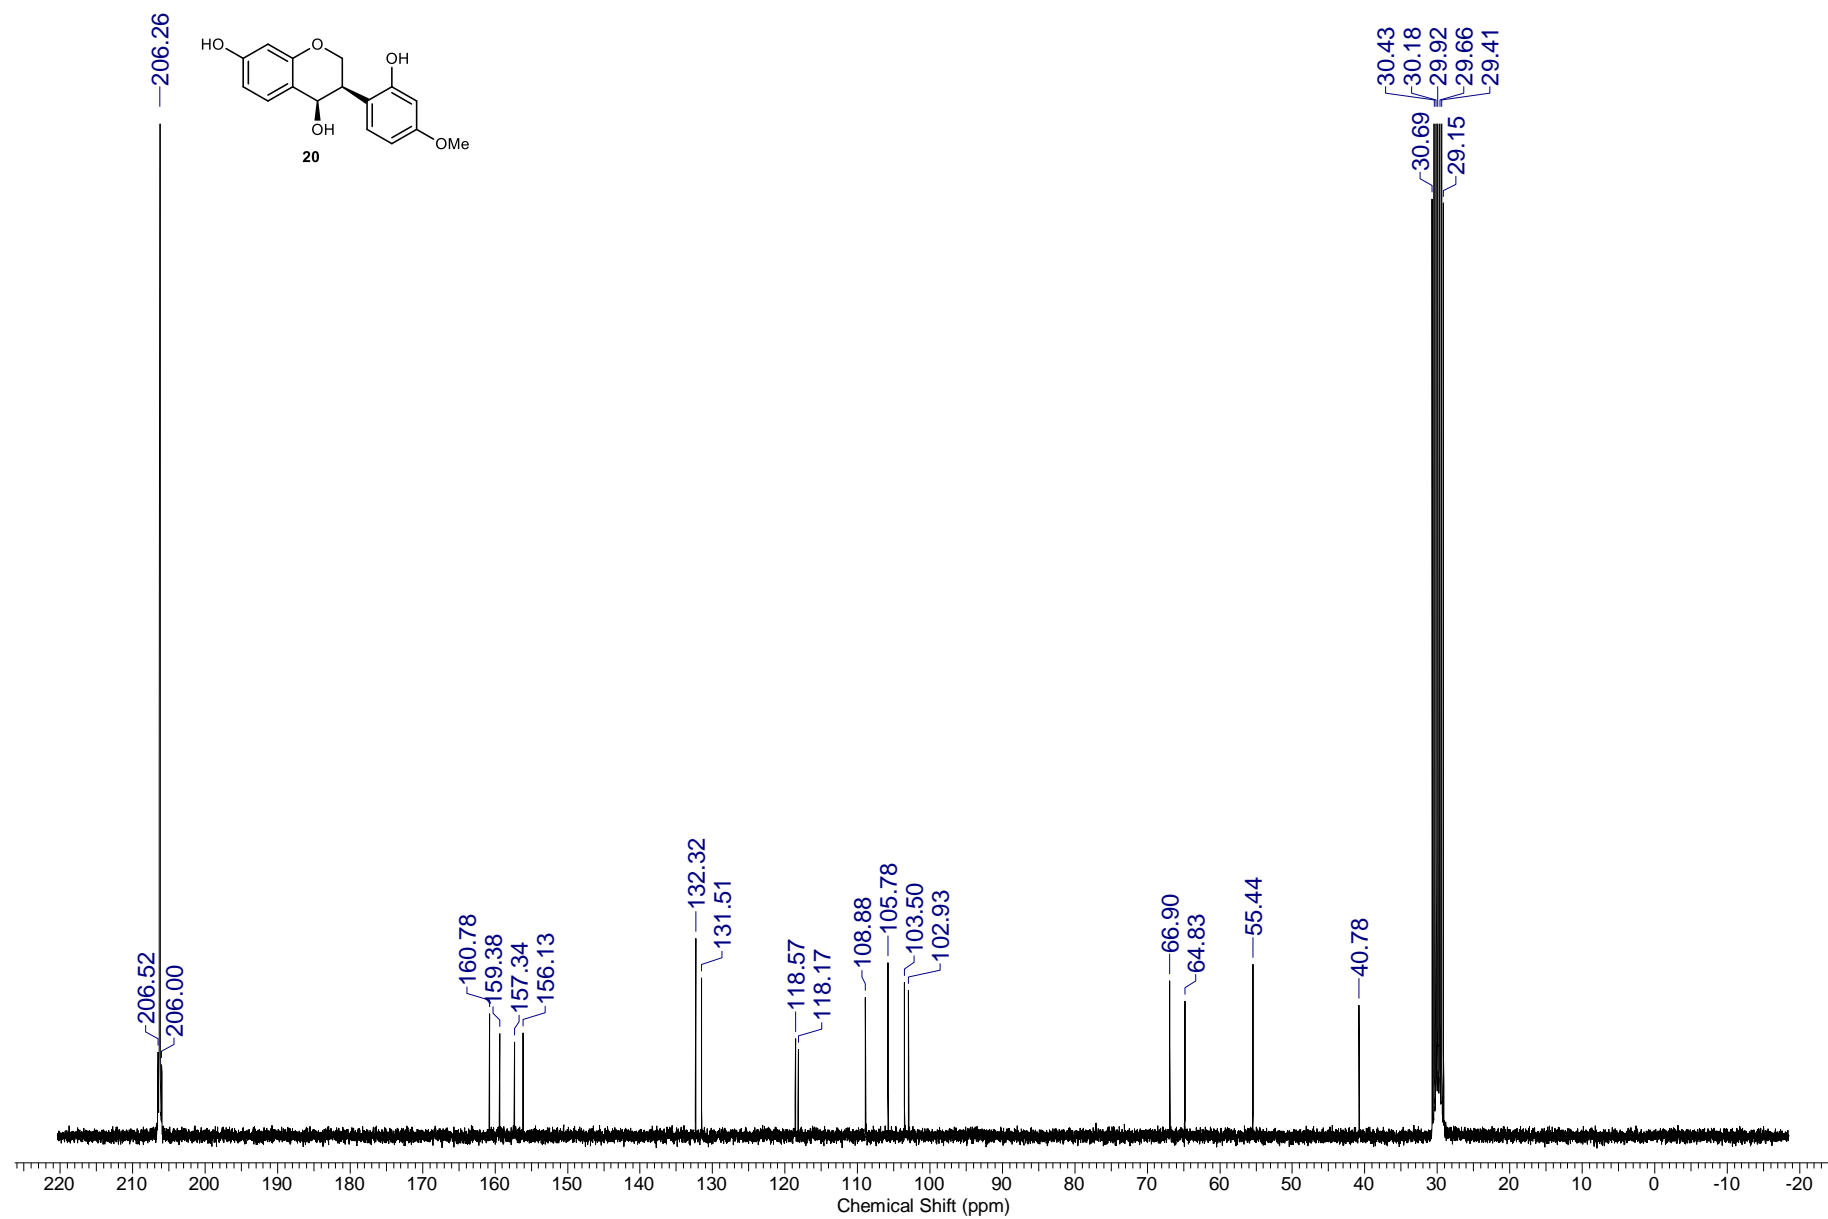

Supplementary Figure 22. <sup>13</sup>C NMR of 20



Chiral HPLC trace of *rac*-**20** (bottom) and (*R,R*)-**20** (top, >99% *ee*); Method: Lux Amylose-1, hexane:isopropanol 70:30 v/v, 0.8 mL/min

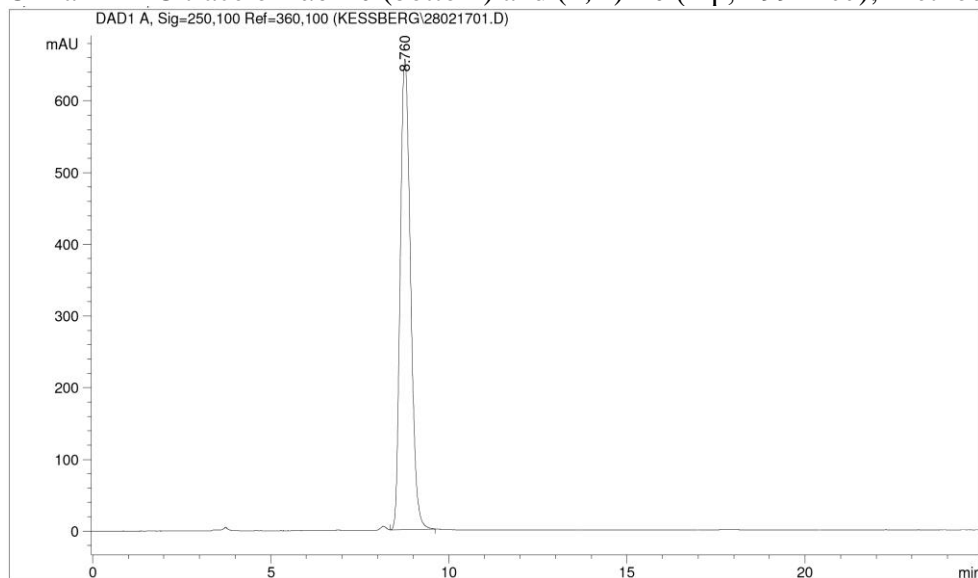

| Peak # | RetTime [min] | Type | Width [min] | Area [mAU*s] | Height [mAU] | Area %   |
|--------|---------------|------|-------------|--------------|--------------|----------|
| 1      | 8.760         | VB   | 0.3184      | 1.31932e4    | 656.58435    | 100.0000 |

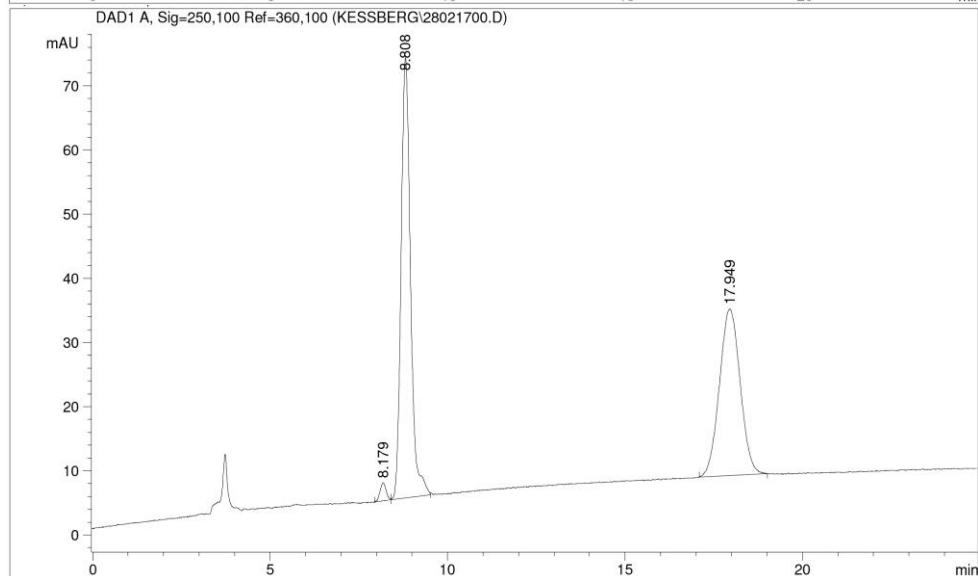

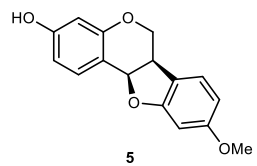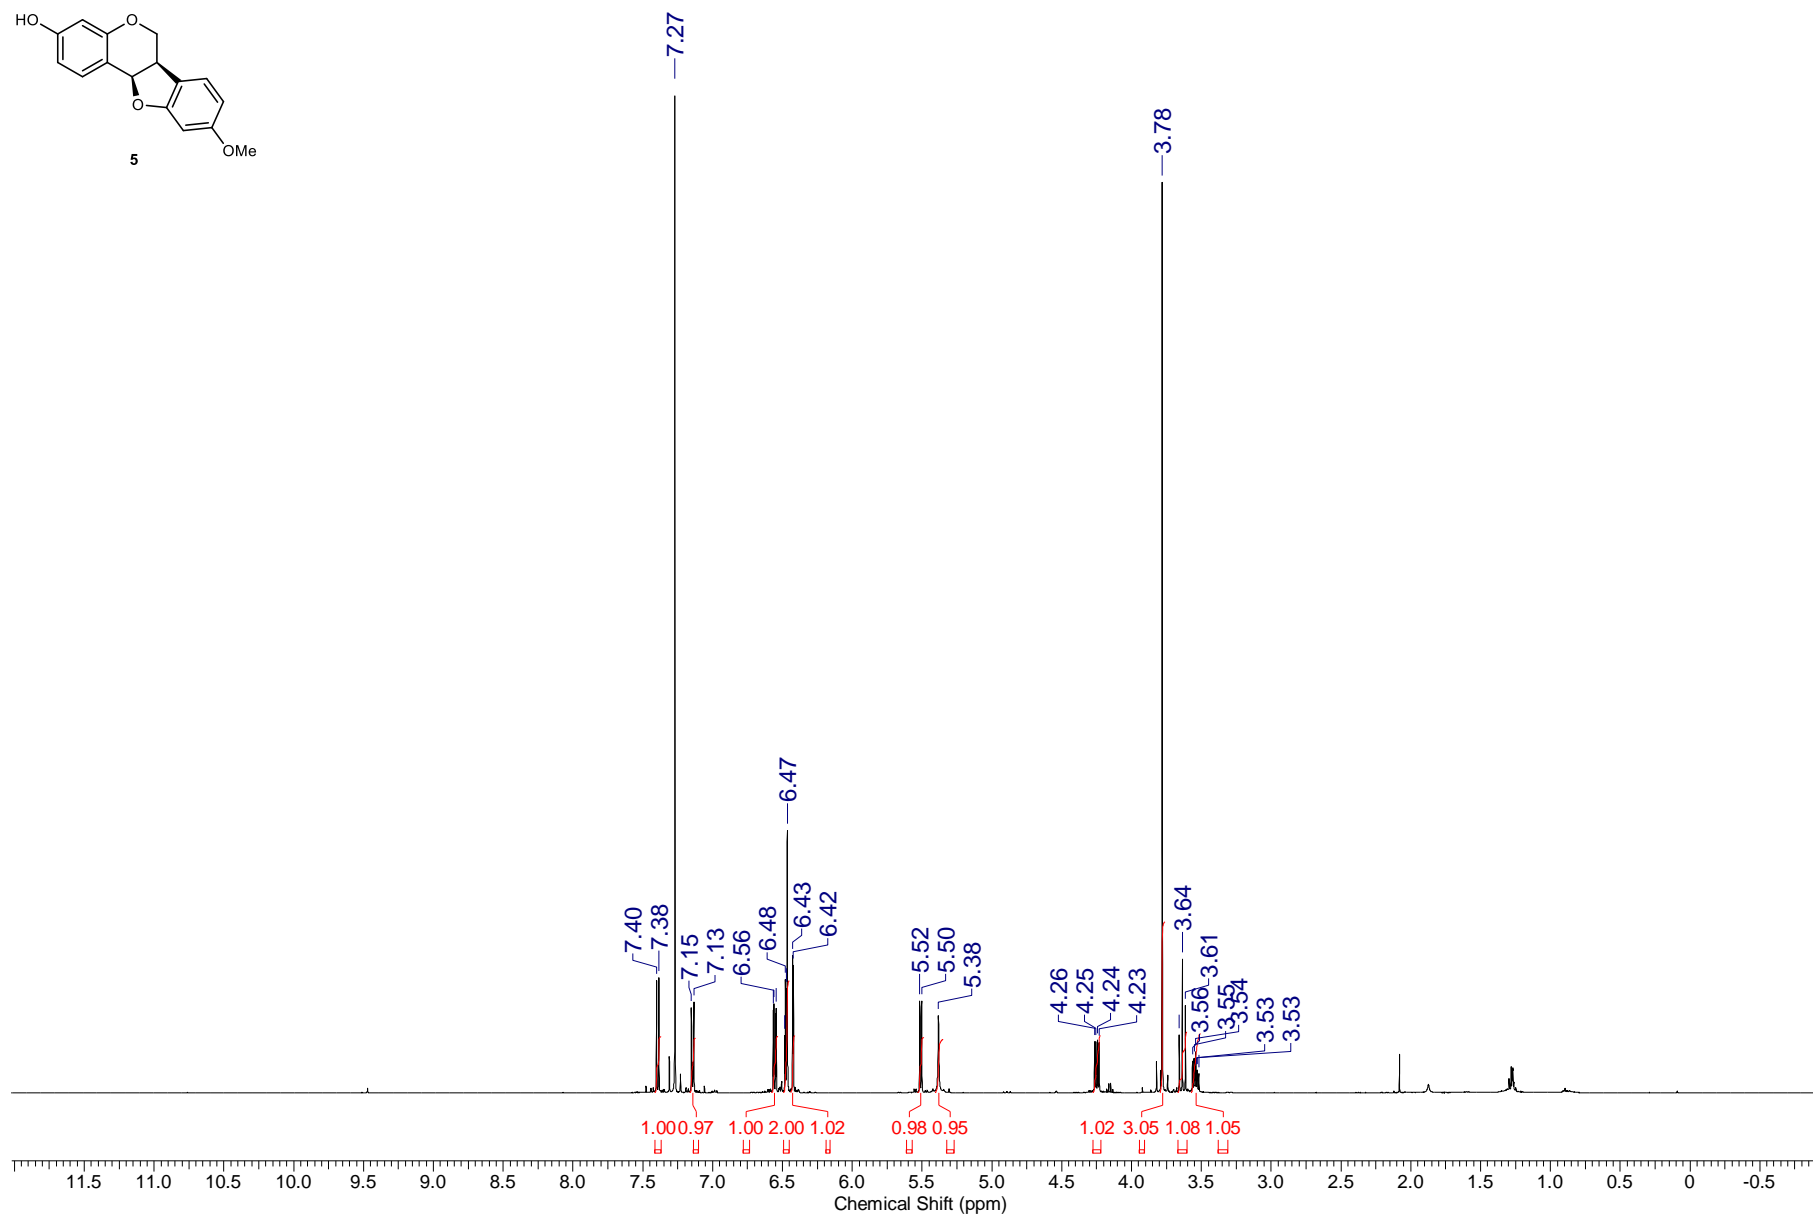

Supplementary Figure 24.  $^1\text{H}$  NMR of 5

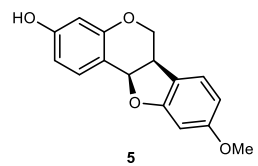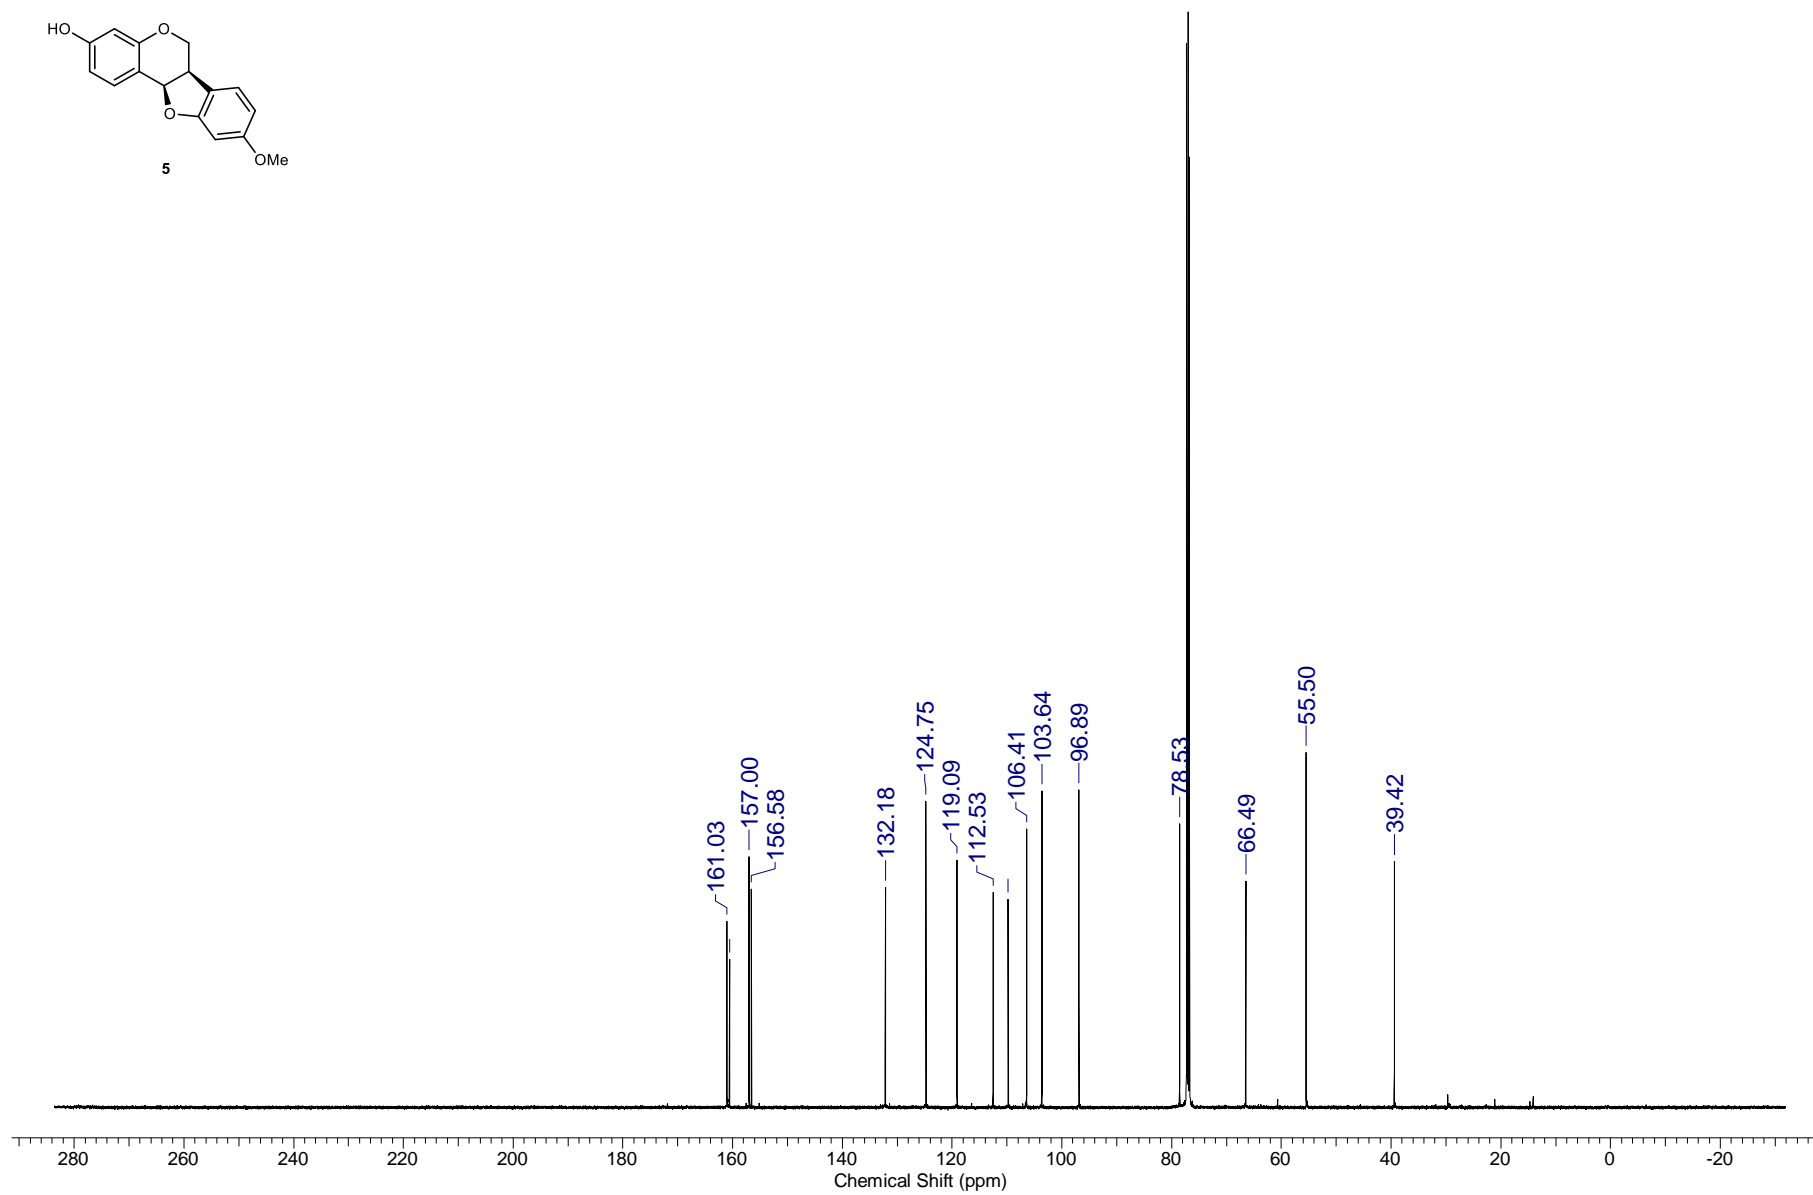

Supplementary Figure 25. <sup>13</sup>C NMR of 5

Chiral HPLC trace of *rac*-**5** (bottom) and (*R,R*)-**5** (top, >99% *ee*); Method: Chiralpak<sup>®</sup> AD, hexane:isopropanol 80:20 *v/v*, 0.8 mL/min

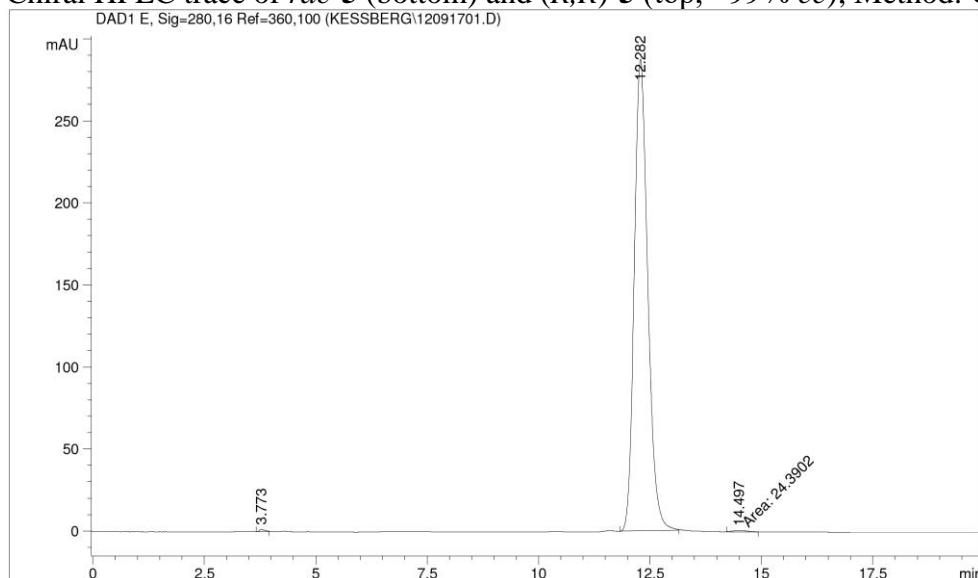

| Peak # | RetTime [min] | Type | Width [min] | Area [mAU*s] | Height [mAU] | Area %  |
|--------|---------------|------|-------------|--------------|--------------|---------|
| 1      | 3.773         | PB   | 0.1216      | 11.36142     | 1.38586      | 0.1868  |
| 2      | 12.282        | PB   | 0.3233      | 6045.40479   | 287.47052    | 99.4121 |
| 3      | 14.497        | MM T | 0.4044      | 24.39021     | 1.00528      | 0.4011  |

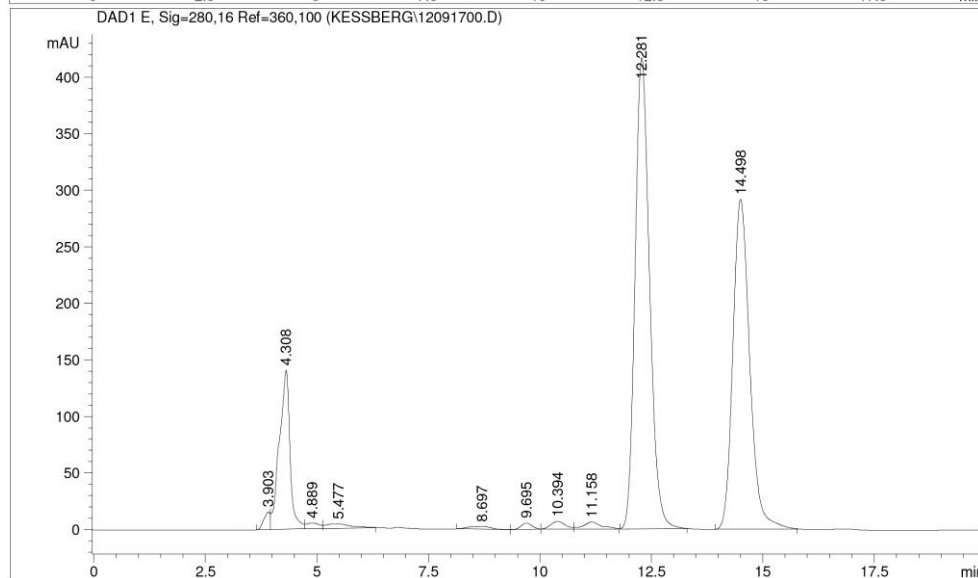

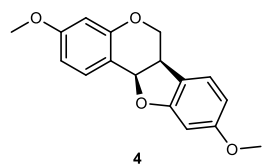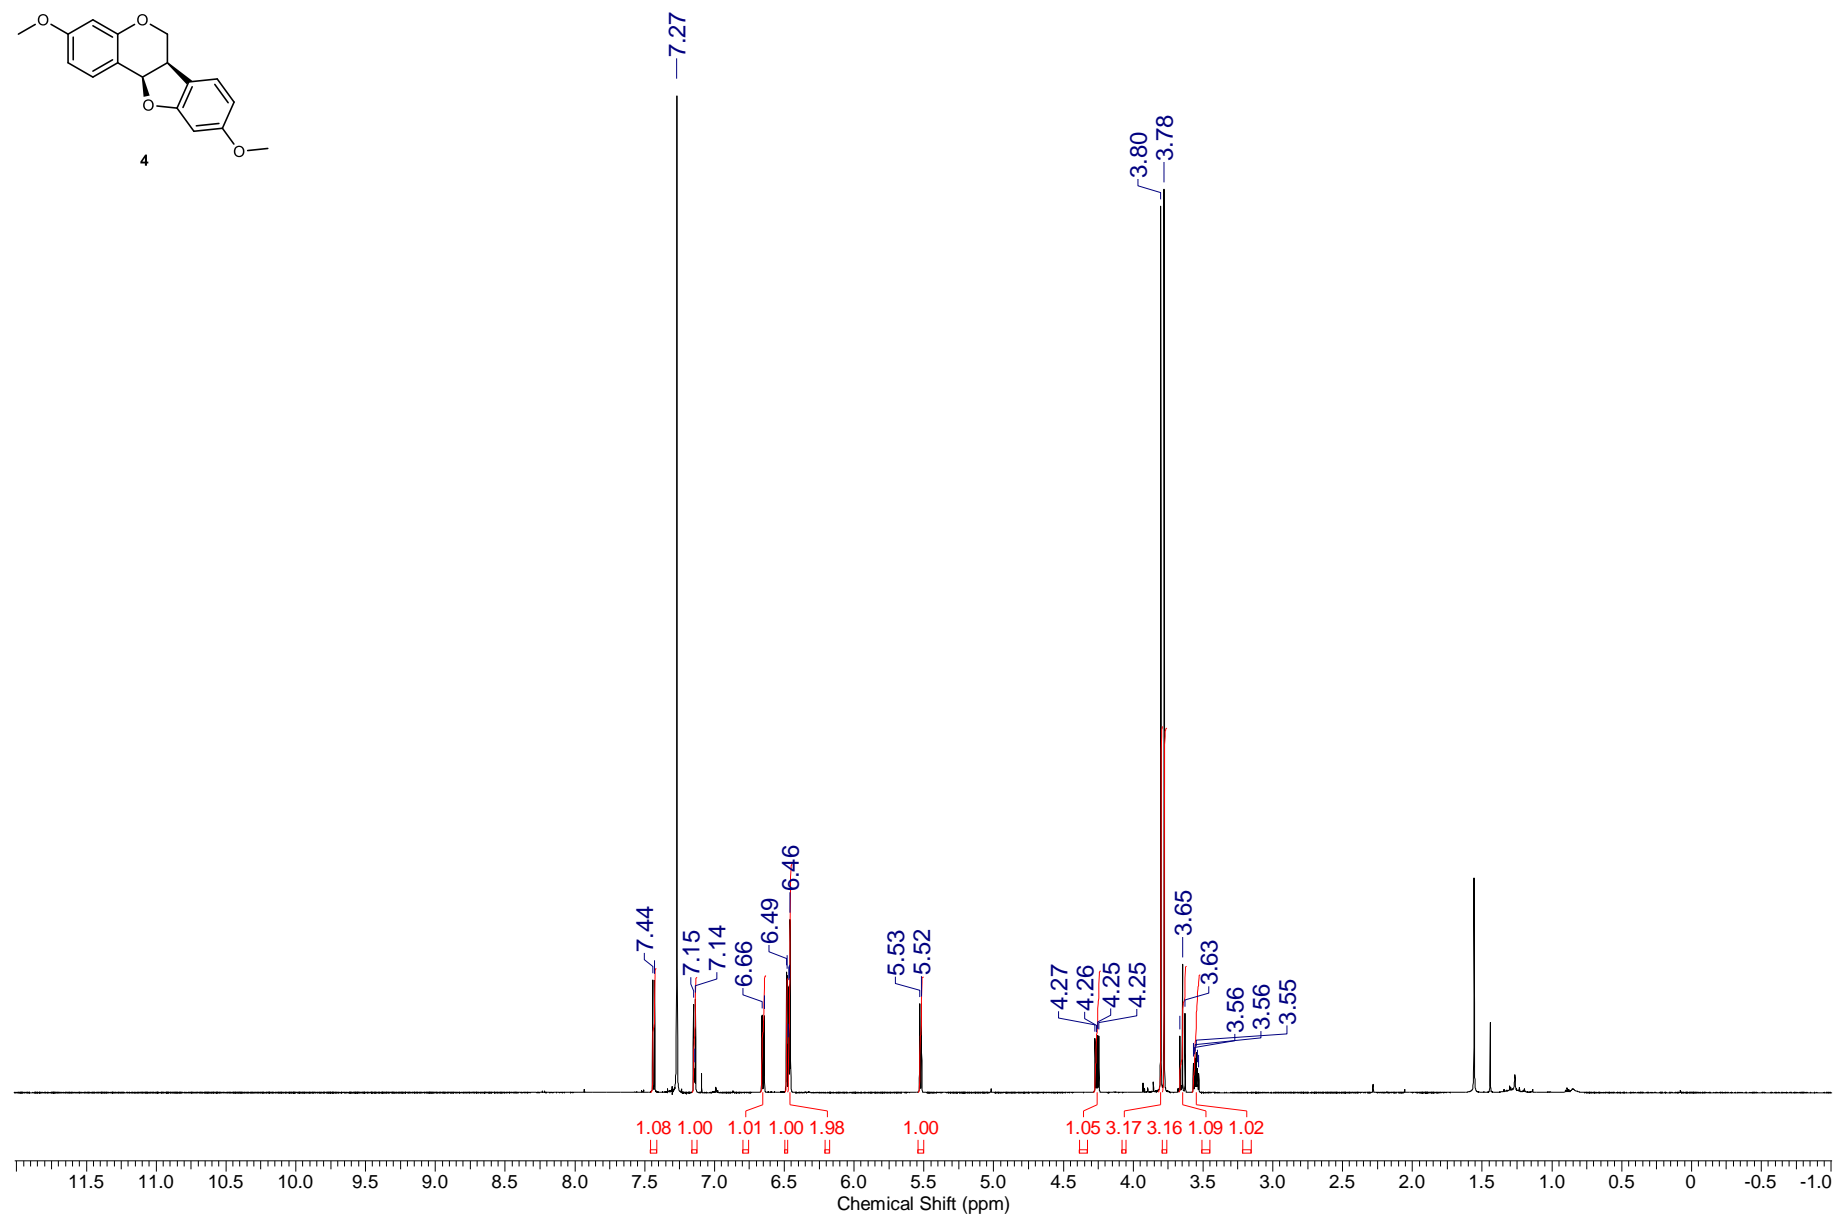

Supplementary Figure 27.  $^1\text{H}$  NMR of 4

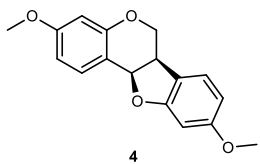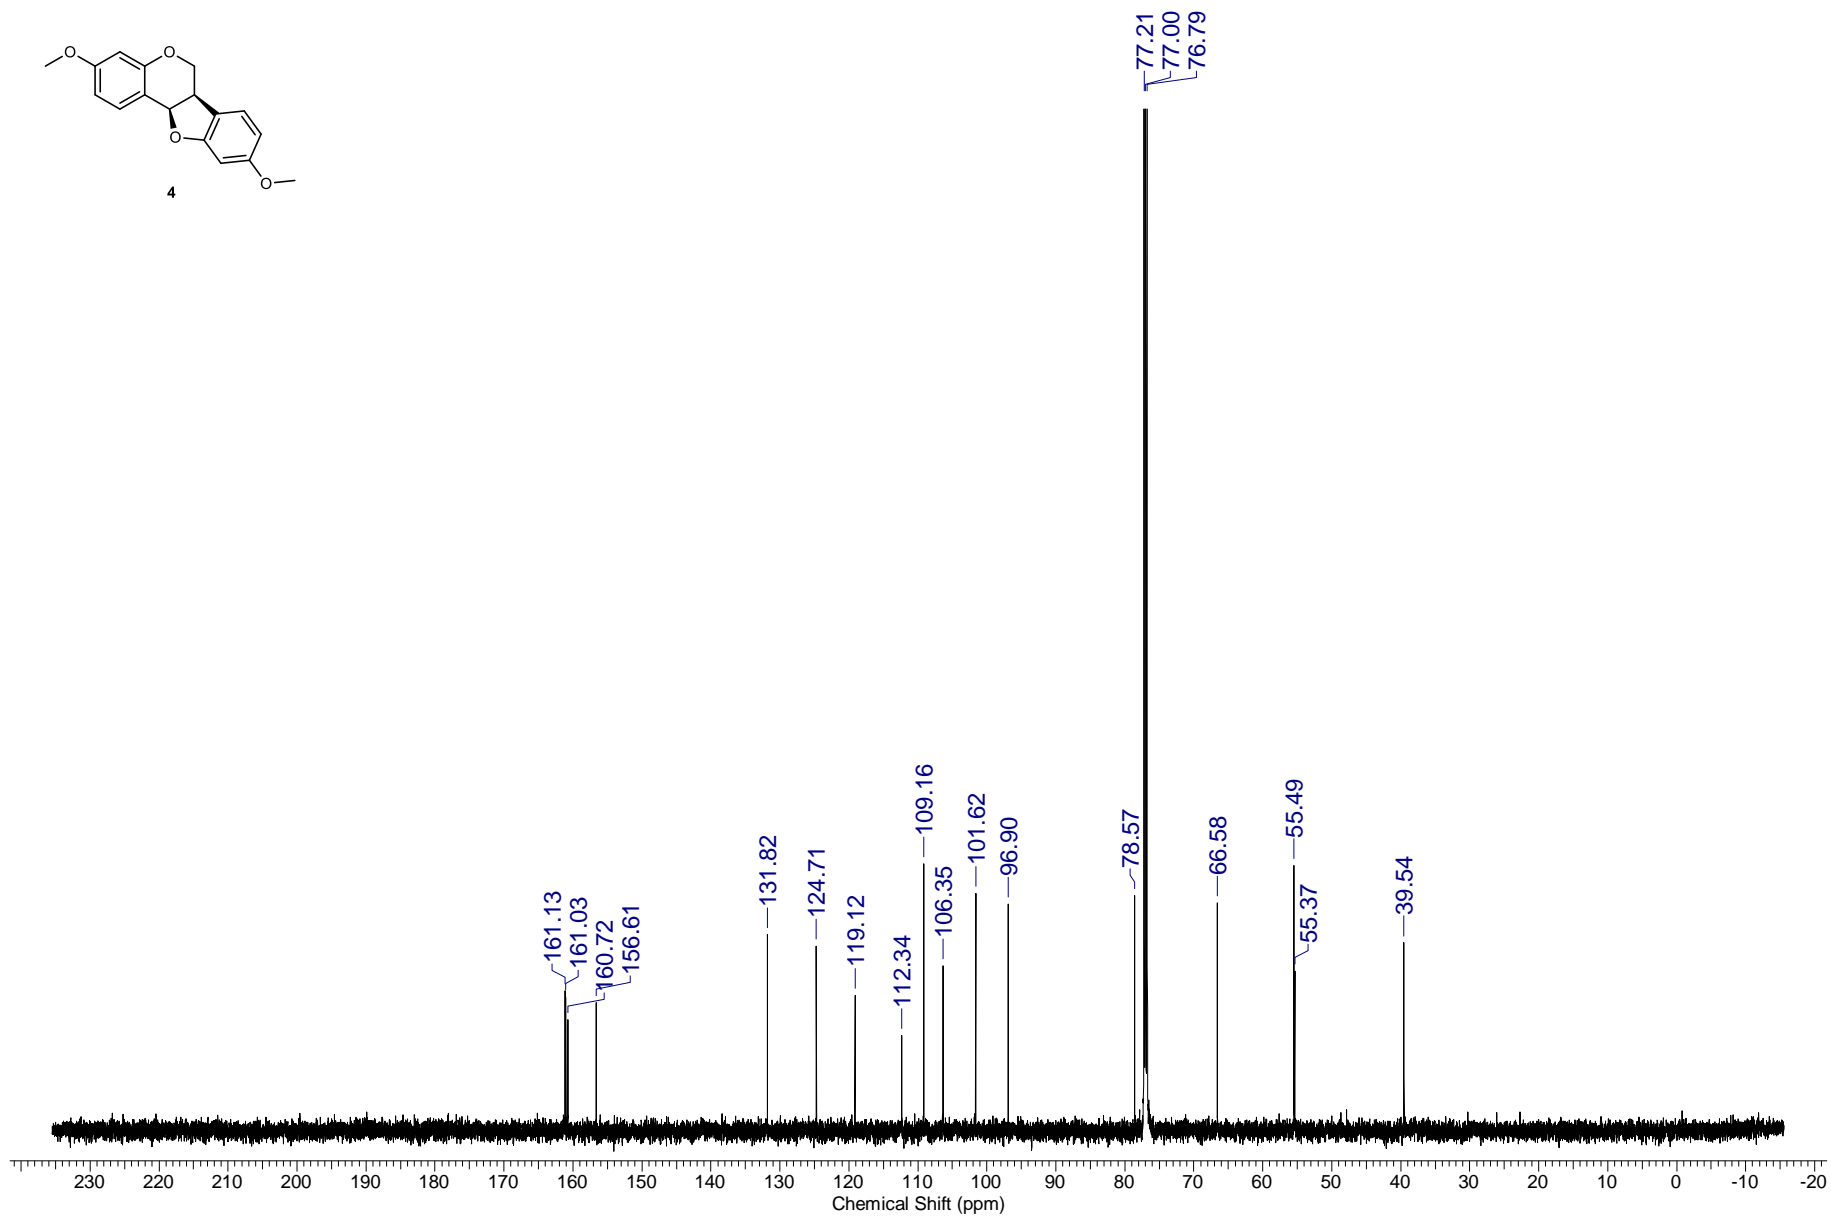

Supplementary Figure 28.  $^{13}\text{C}$  NMR of 4

Chiral HPLC trace of *rac*-**4** (bottom) and (*R,R*)-**4** (top, >99% *ee*); Method: Chiralpak® AD, hexane:isopropanol 90:10 *v/v*, 0.7 mL/min

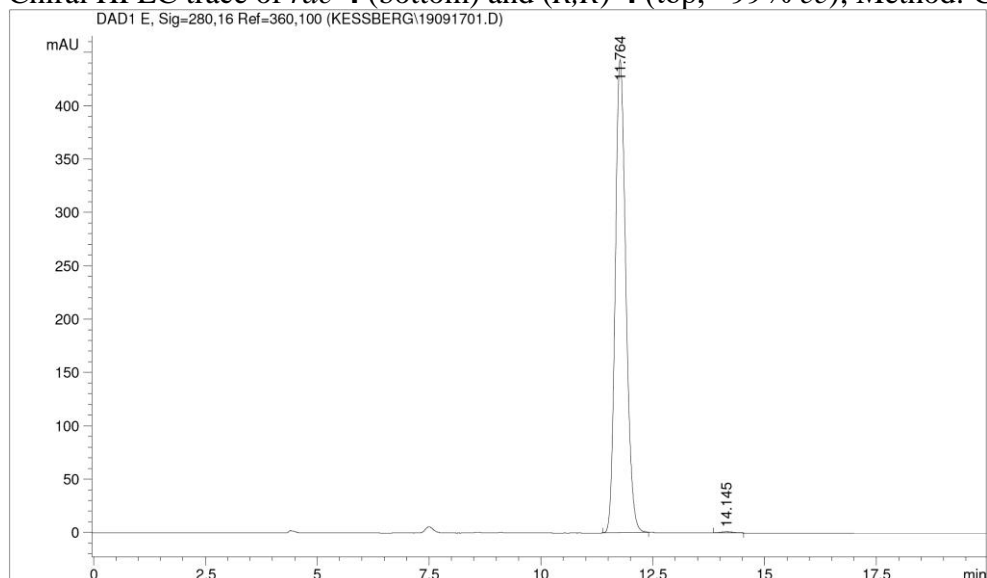

| Peak # | RetTime [min] | Type | Width [min] | Area [mAU*s] | Height [mAU] | Area %  |
|--------|---------------|------|-------------|--------------|--------------|---------|
| 1      | 11.764        | BB   | 0.2544      | 7314.91895   | 443.58646    | 99.6756 |
| 2      | 14.145        | BB   | 0.2686      | 23.80468     | 1.29420      | 0.3244  |

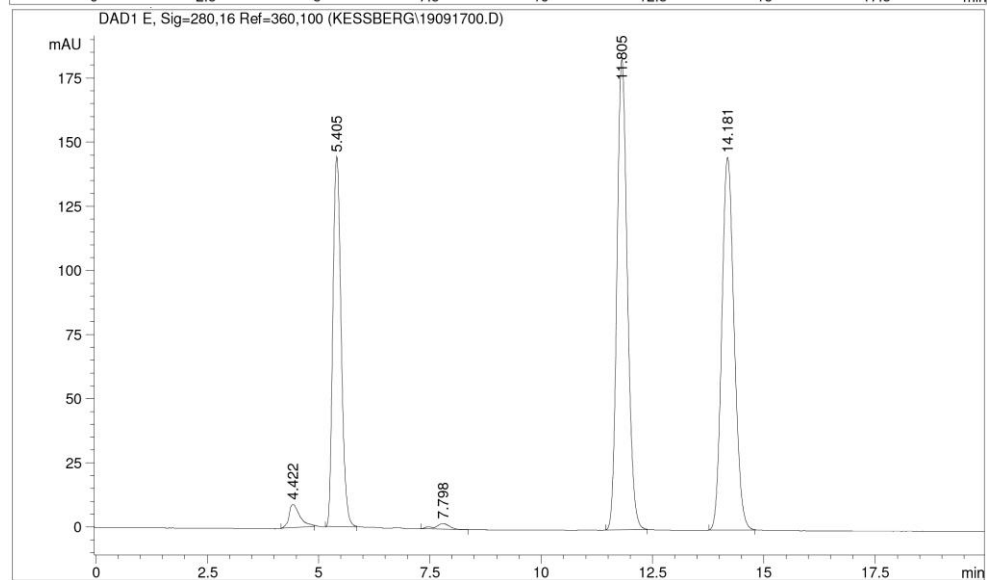

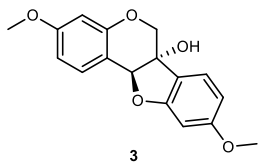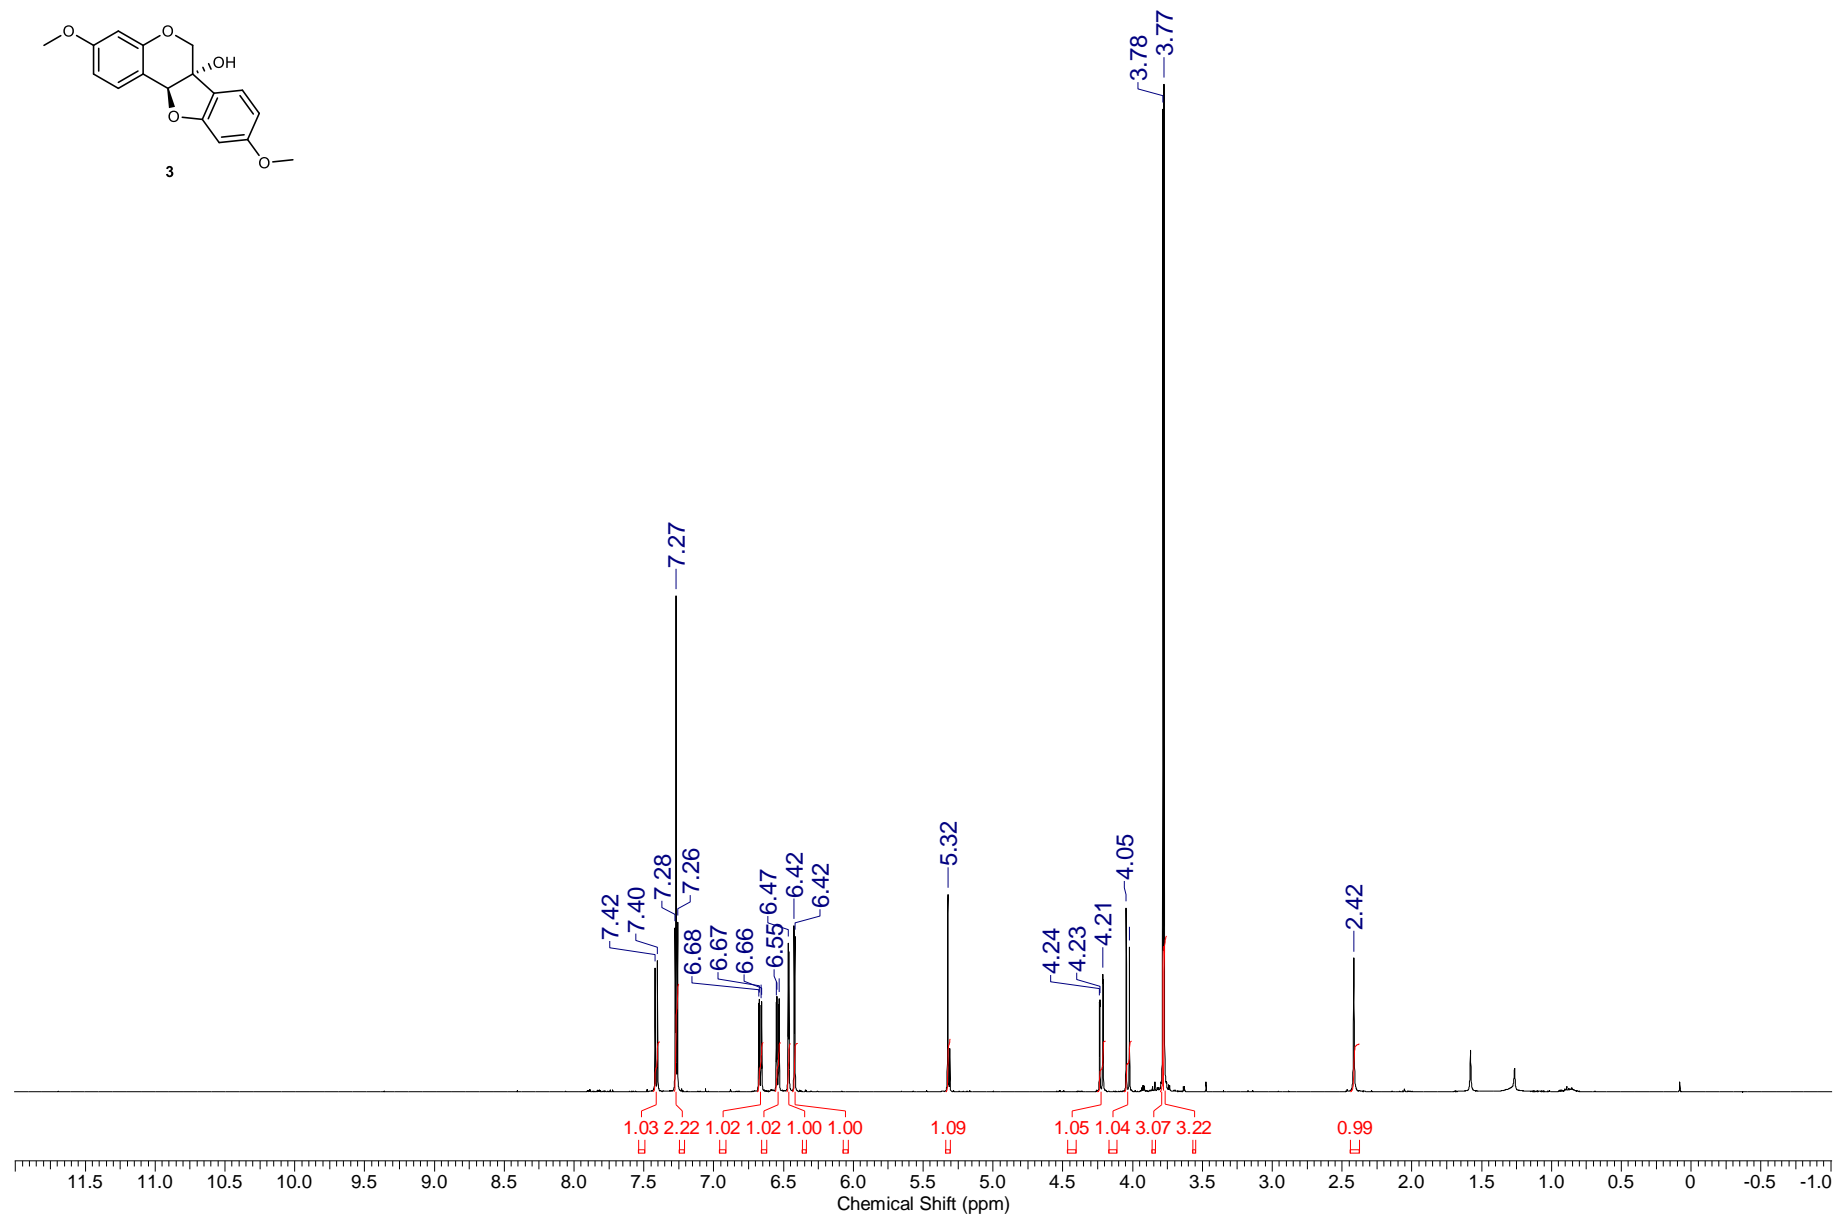

Supplementary Figure 30.  $^1\text{H}$  NMR of 3



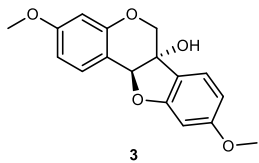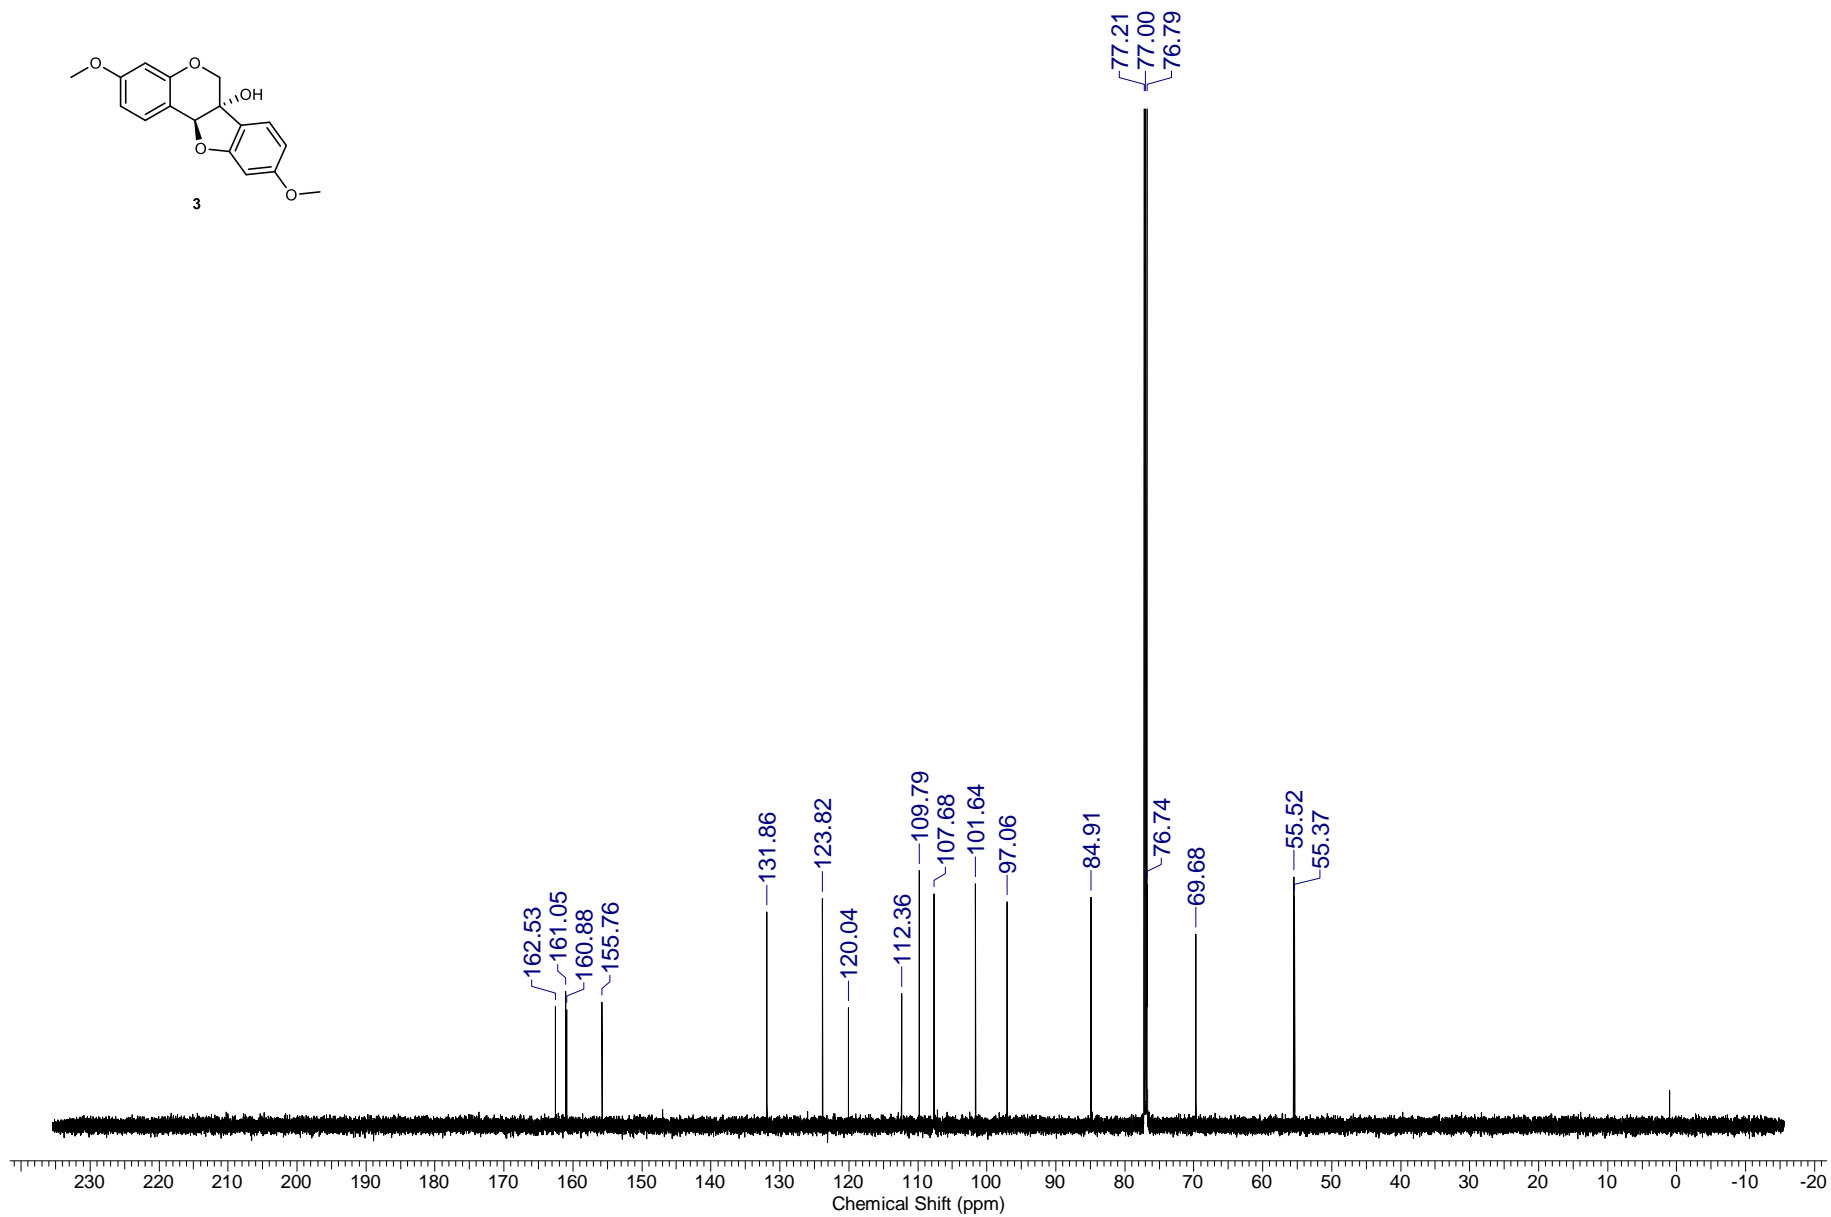

Supplementary Figure 31.  $^{13}\text{C}$  NMR of 3

Chiral HPLC trace of *rac*-**3** (bottom) and (*S,S*)-**3** (top, >99% *ee*); Method: Chiralpak® AD, hexane:isopropanol 80:20 *v/v*, 1.0 mL/min.

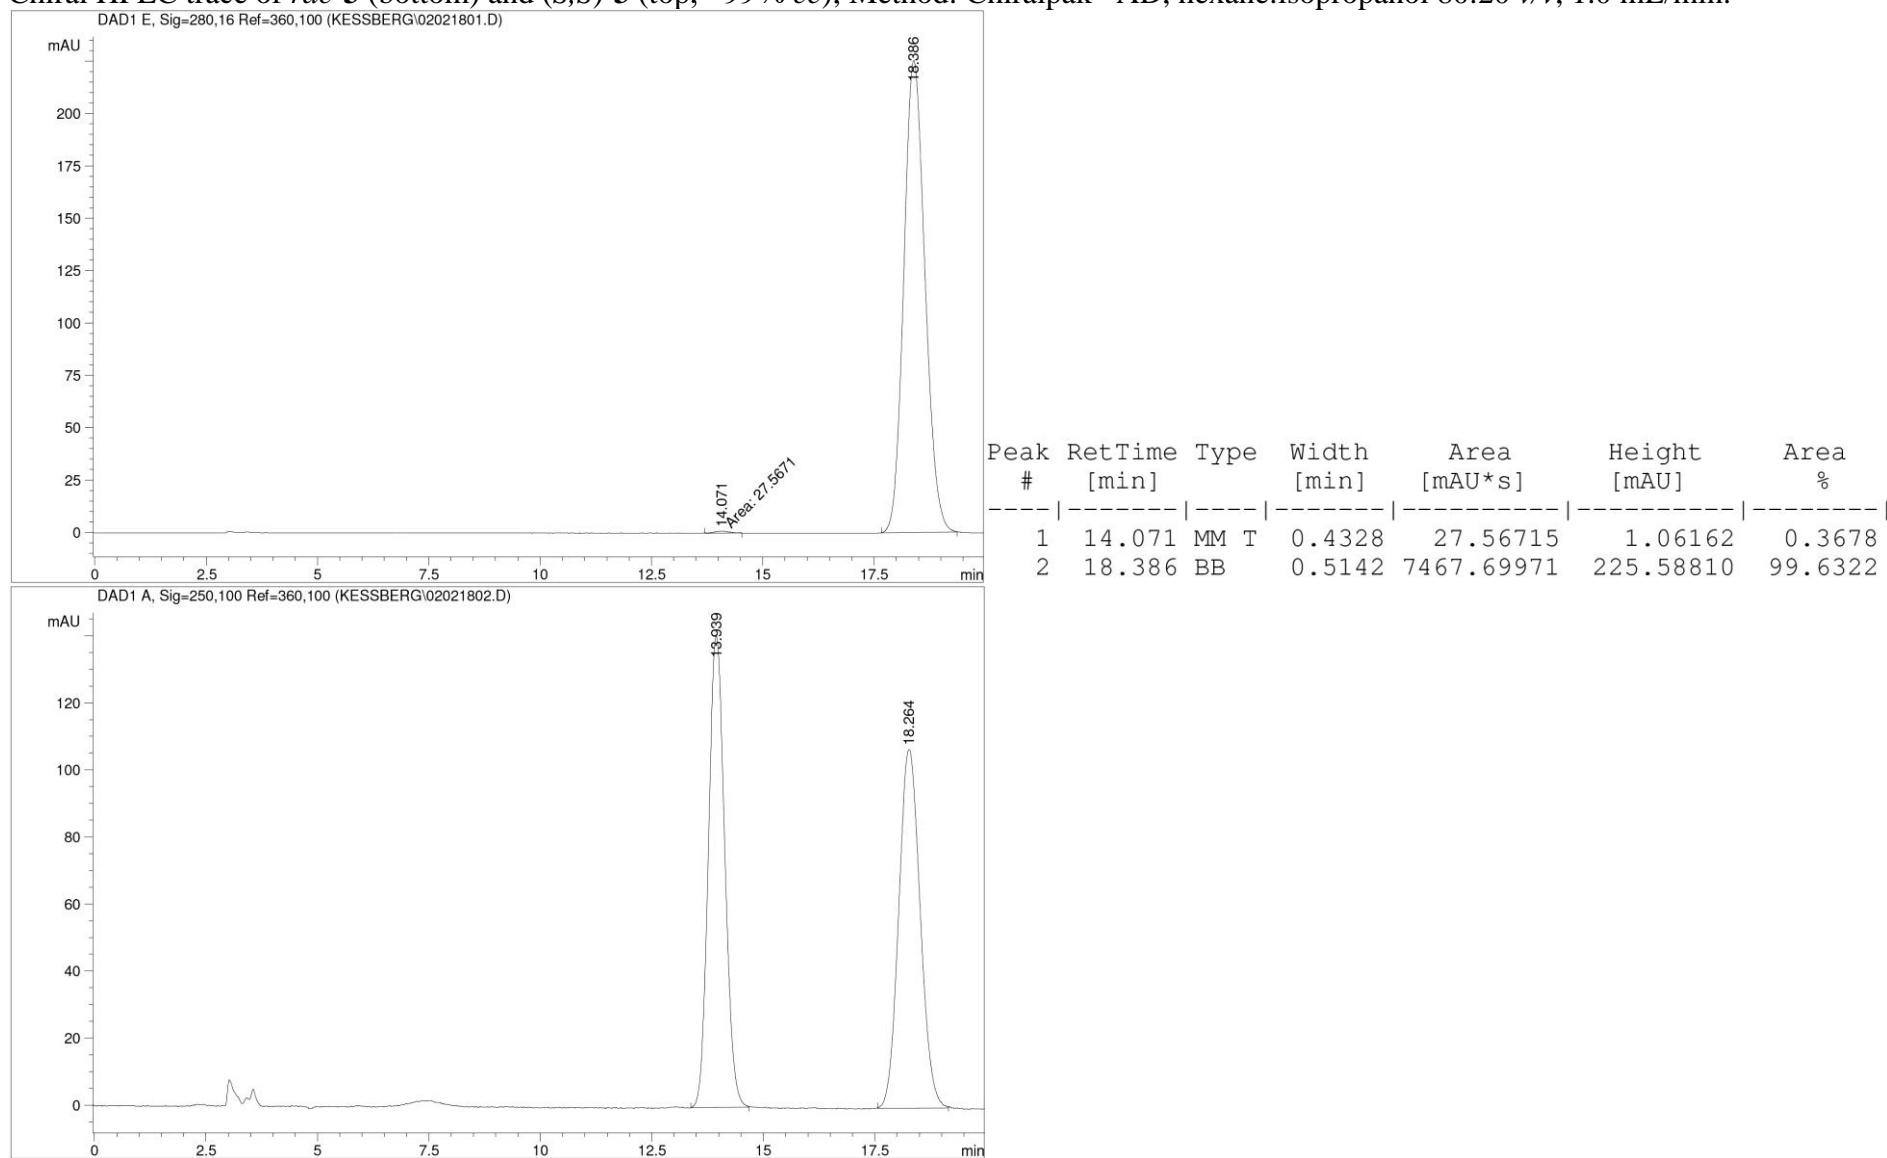

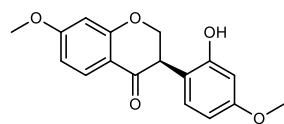

21

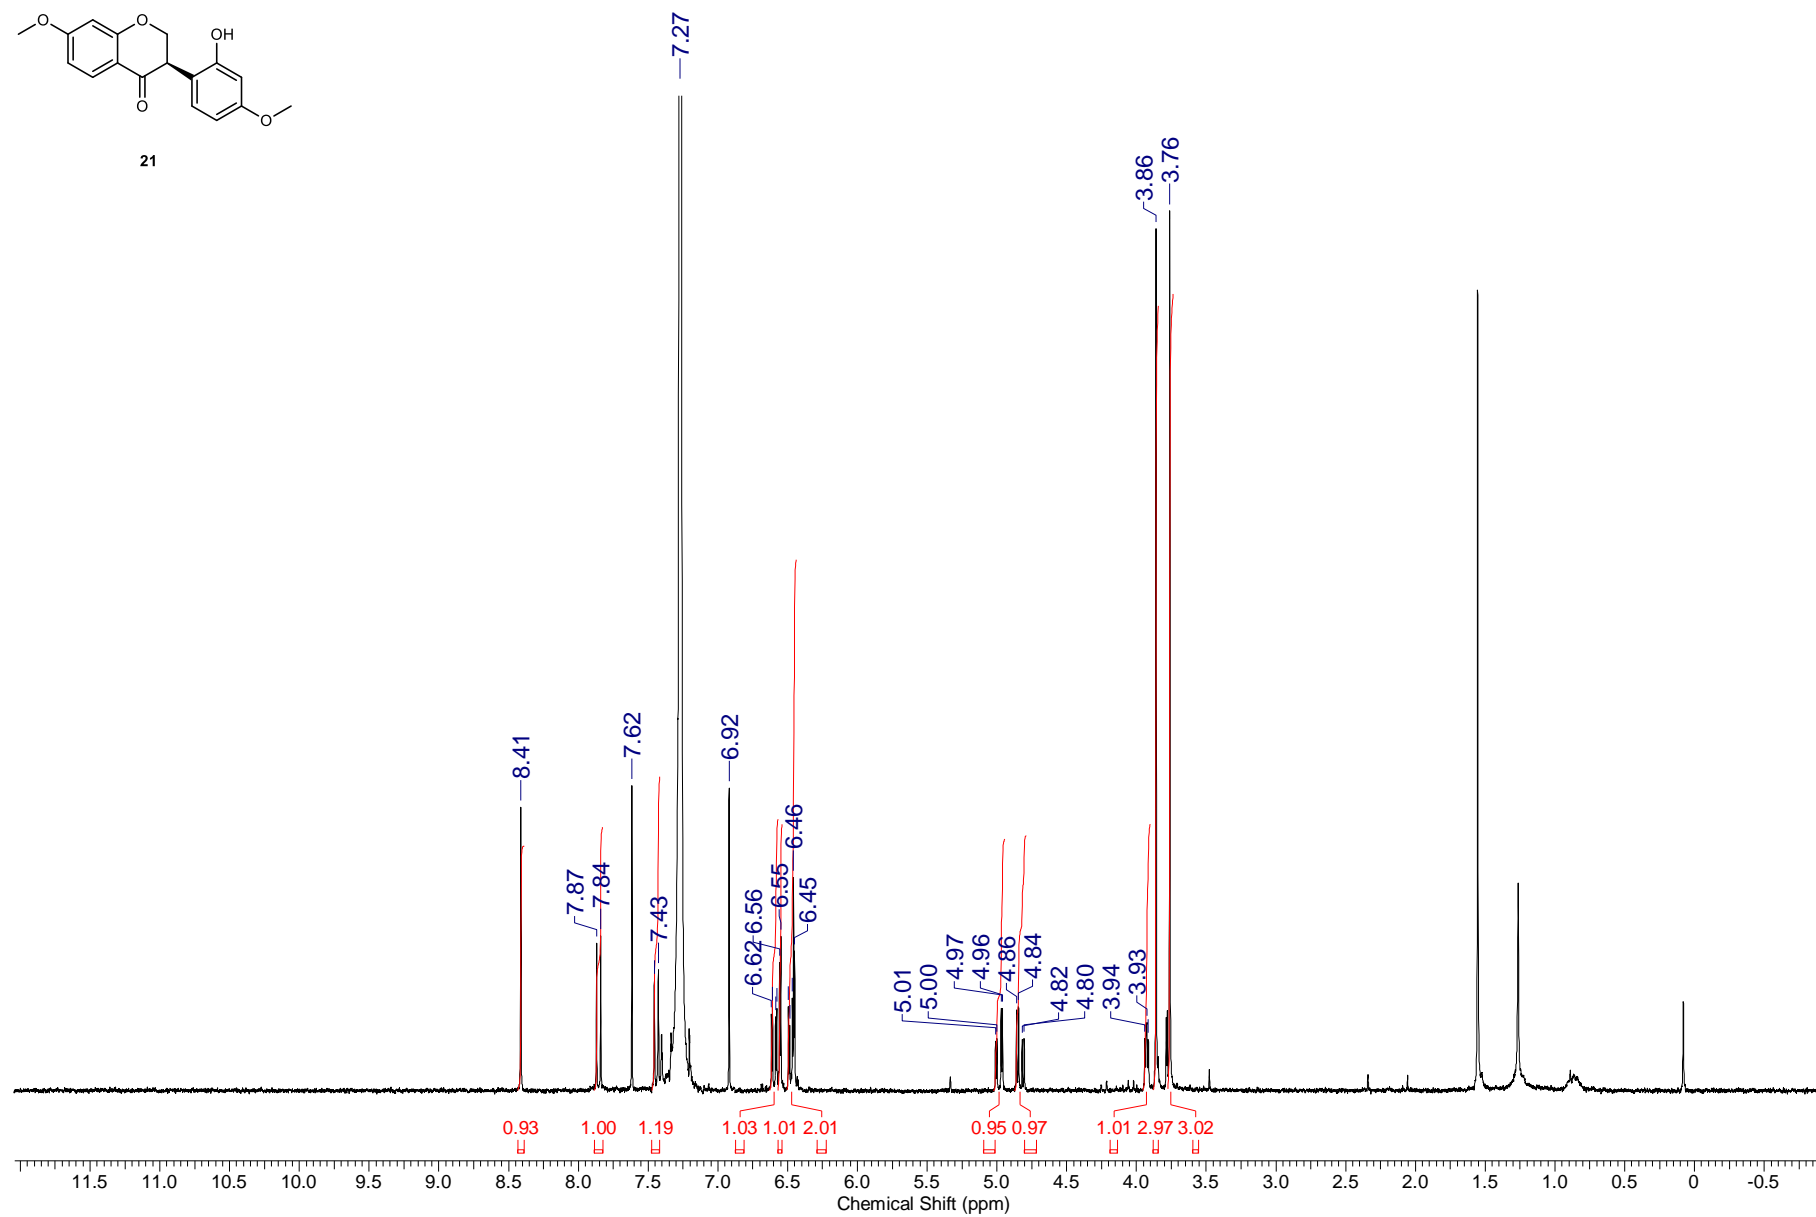

Supplementary Figure 33.  $^1\text{H}$  NMR of 21

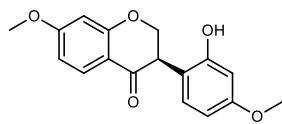

21

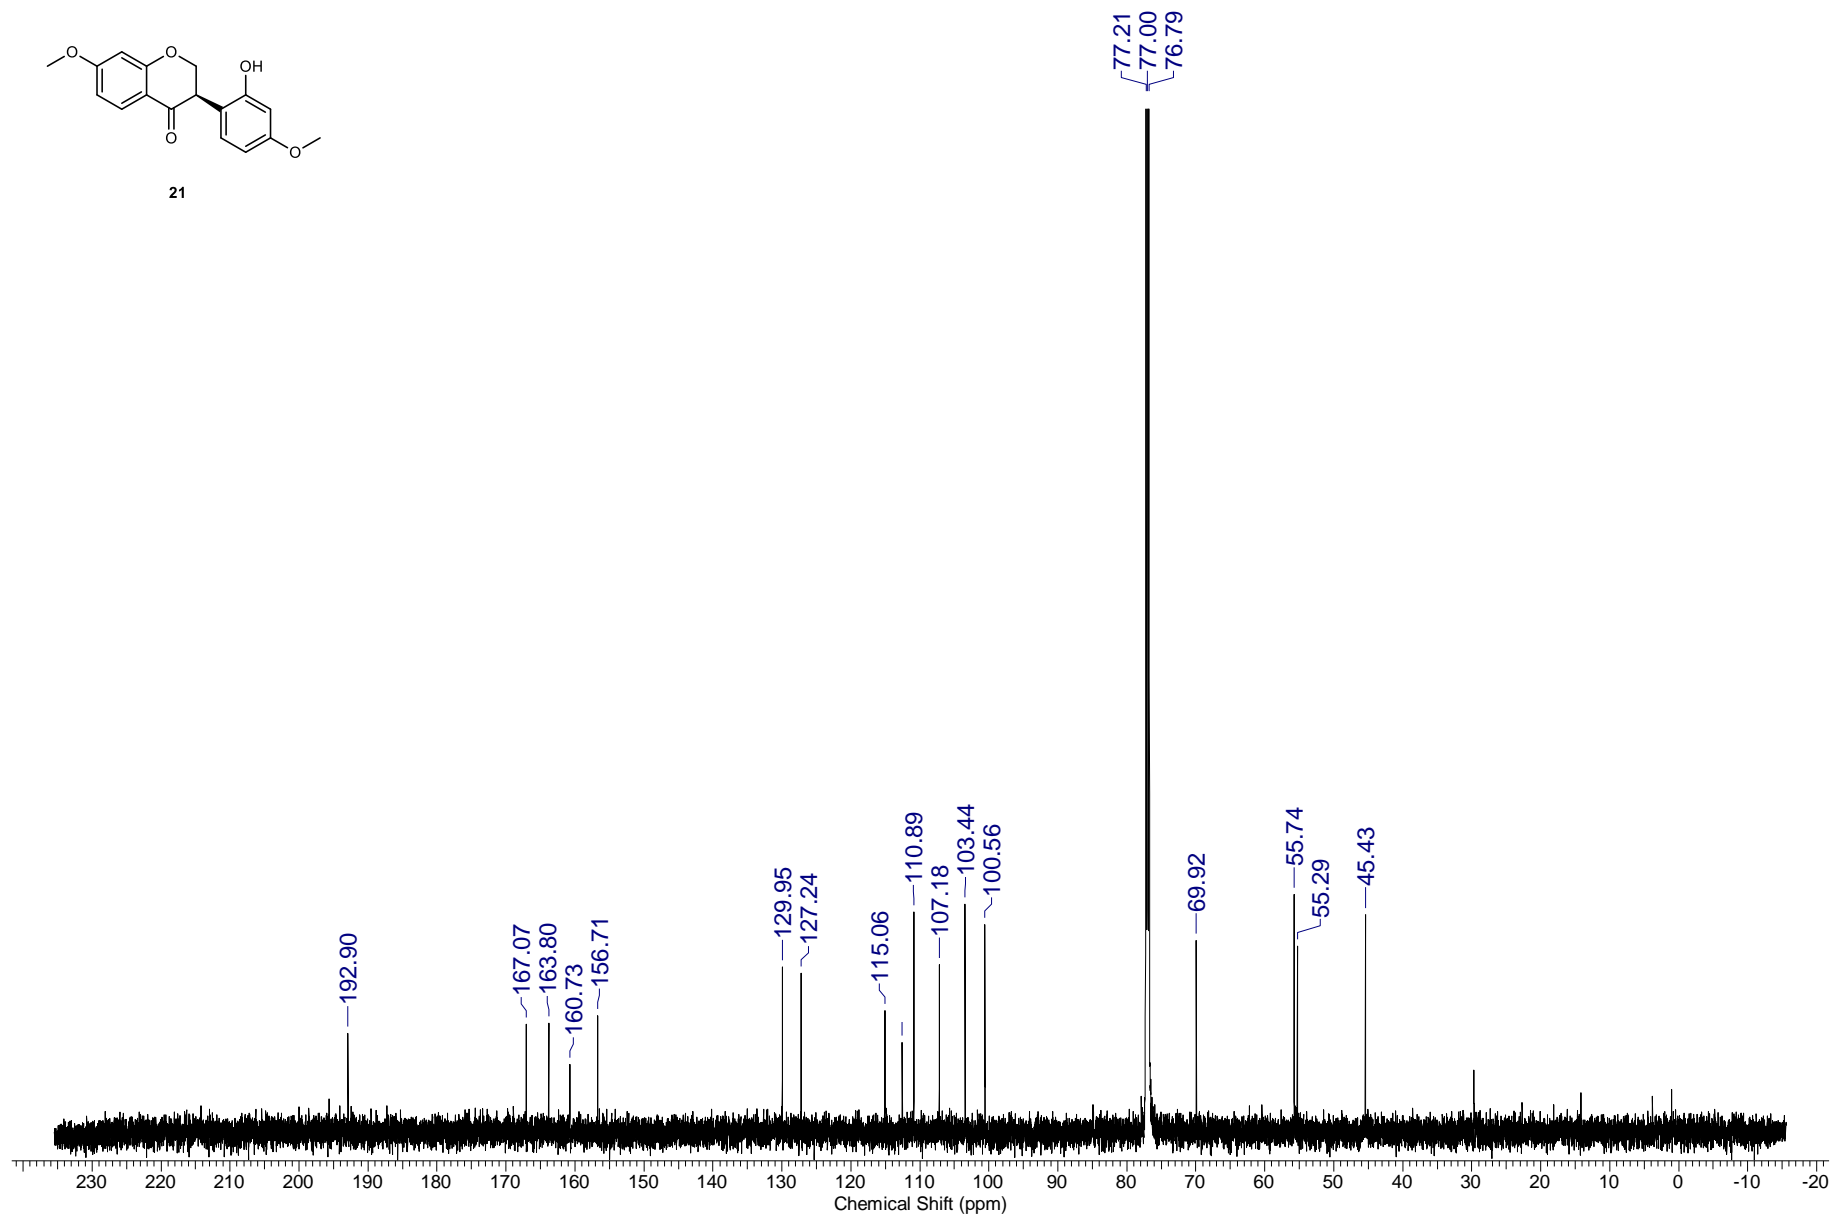

Supplementary Figure 34.  $^{13}\text{C}$  NMR of 21

Chiral HPLC trace of *rac*-**21** (bottom) and (*R*)-**21** (top, 91% *ee*); Method: Chiralpak® AD, hexane:isopropanol 80:20 *v/v*, 1.0 mL/min

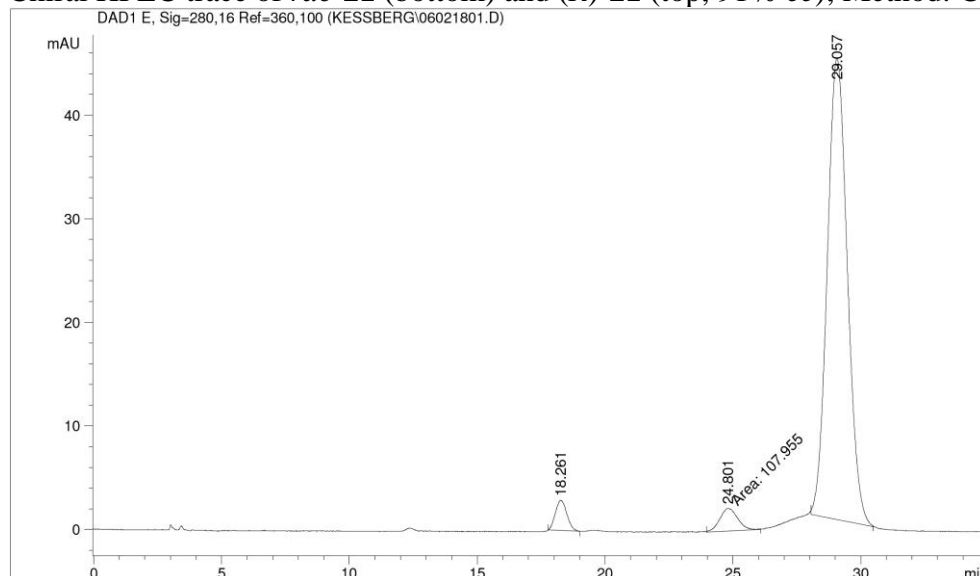

| Peak # | RetTime [min] | Type | Width [min] | Area [mAU*s] | Height [mAU] | Area %  |
|--------|---------------|------|-------------|--------------|--------------|---------|
| 1      | 18.261        | BP   | 0.3763      | 90.29533     | 2.90750      | 3.4375  |
| 2      | 24.801        | MM T | 0.8223      | 107.95507    | 2.18807      | 4.1098  |
| 3      | 29.057        | BB   | 0.8325      | 2428.50171   | 44.51419     | 92.4526 |

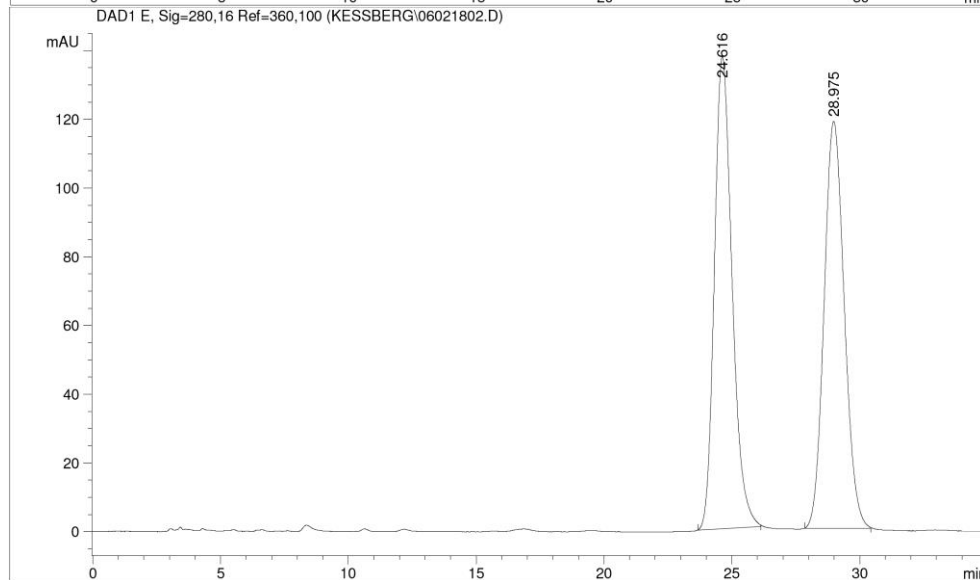

Supplementary Figure 35. Chiral HPLC trace of **21**

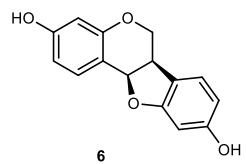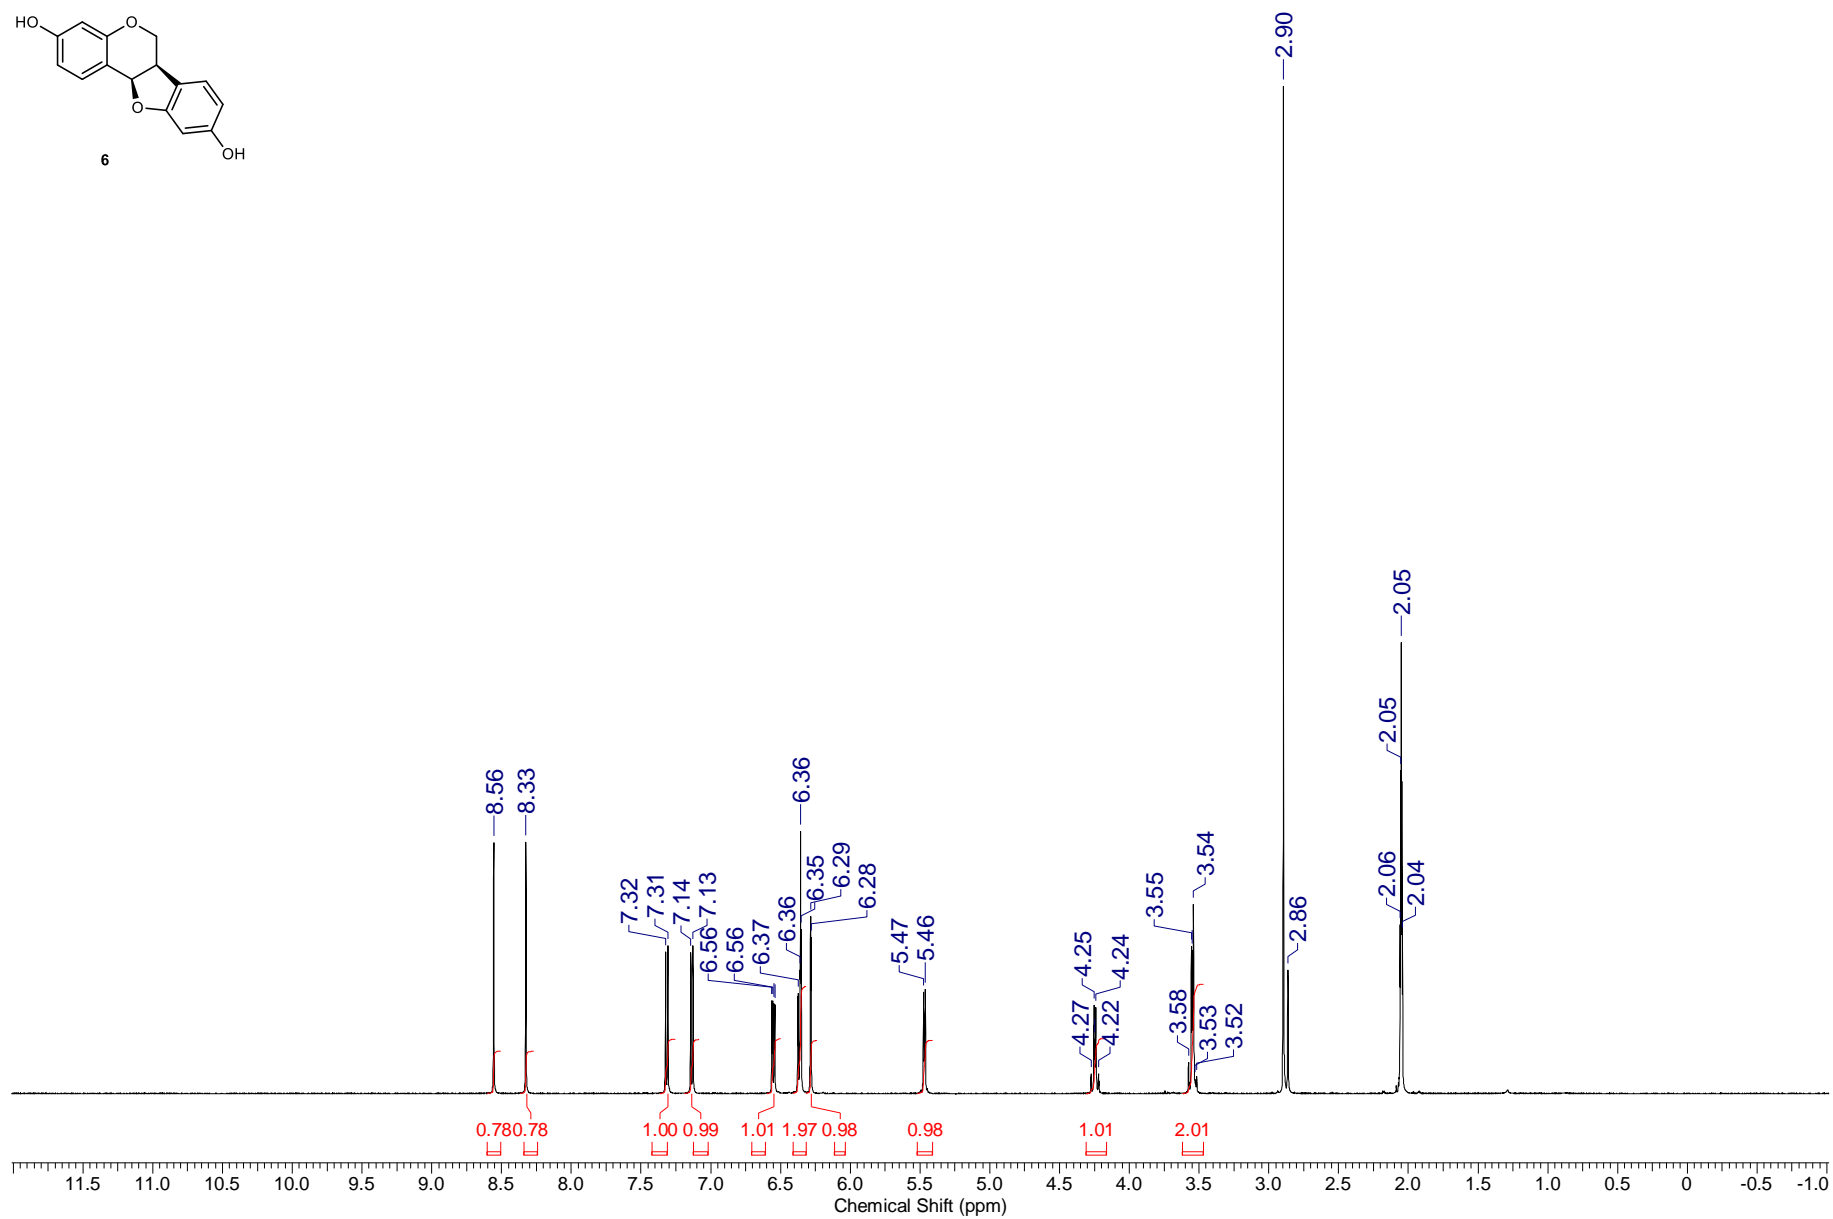

Supplementary Figure 36.  $^1\text{H}$  NMR of 6

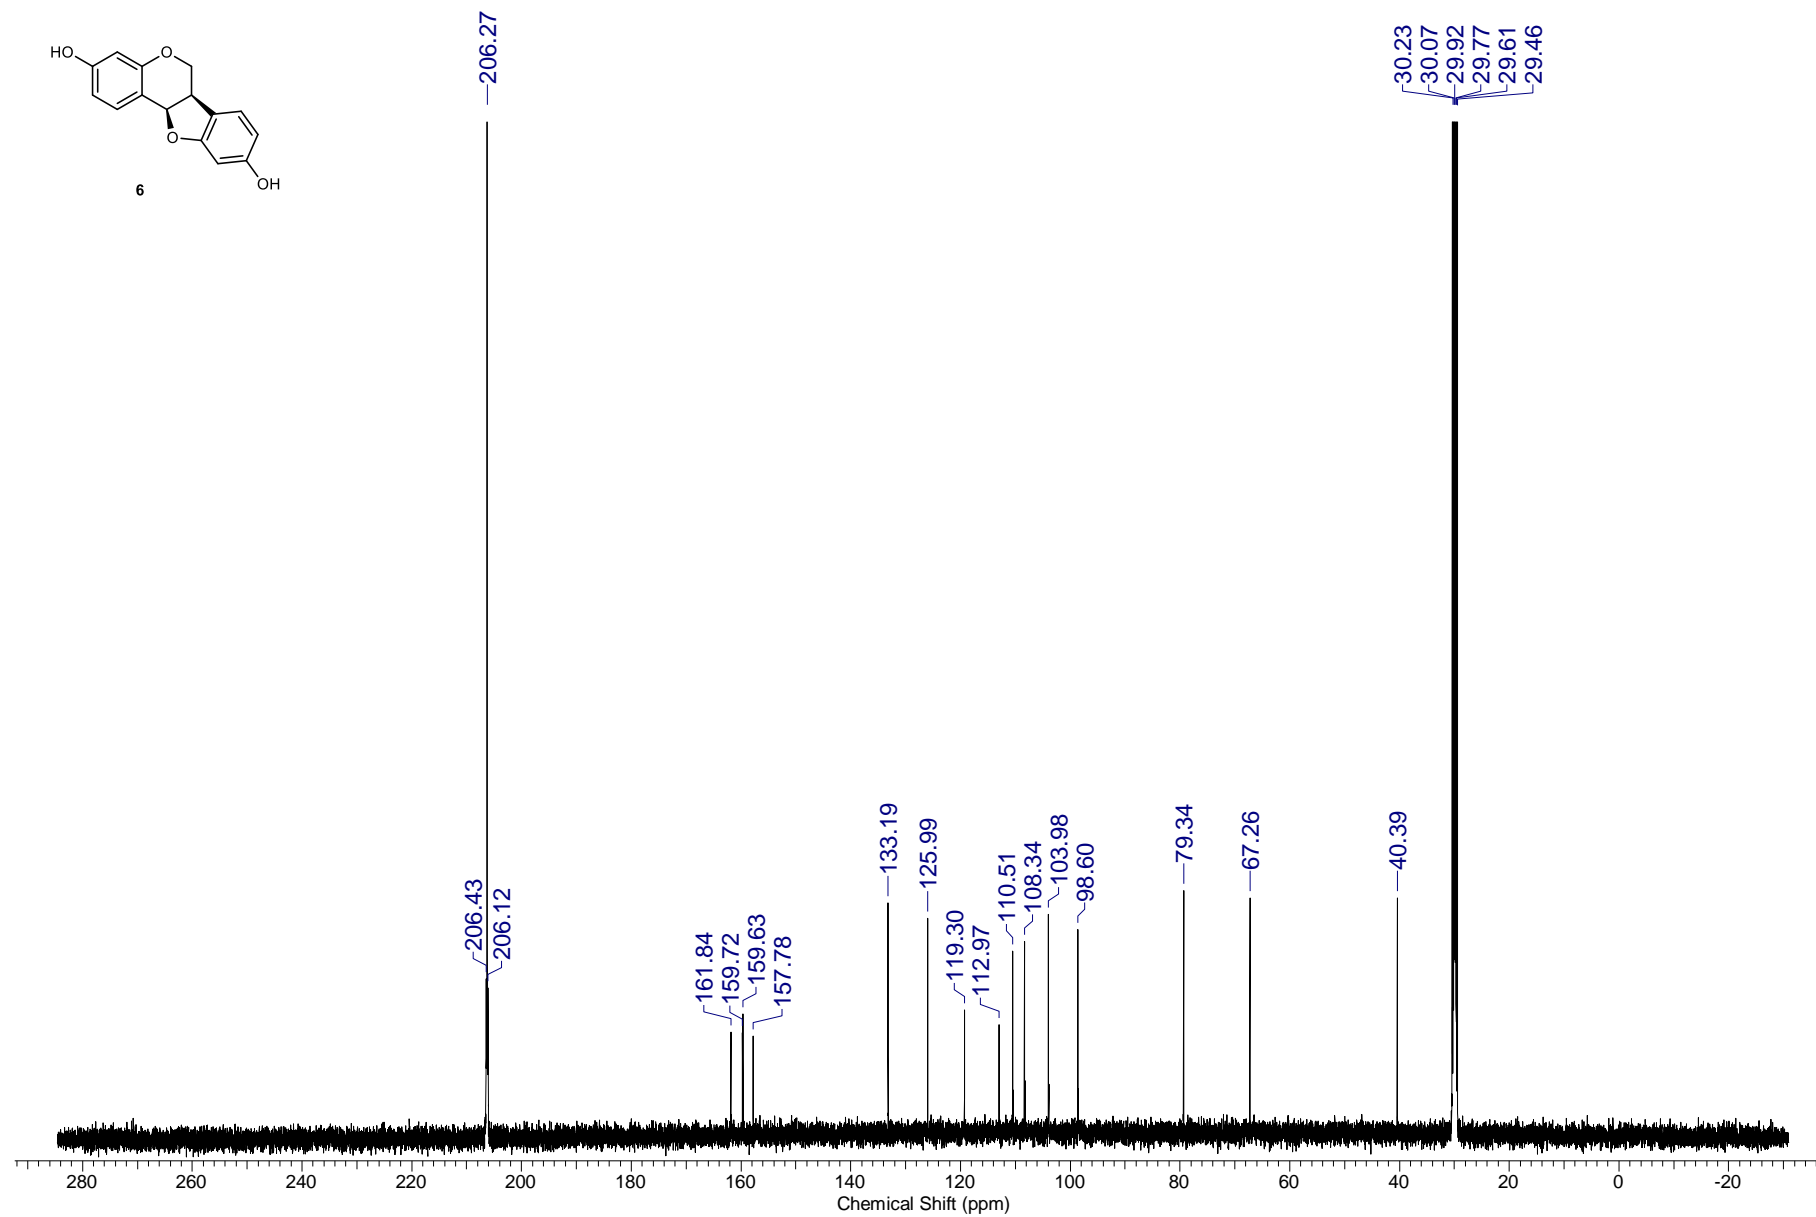

Supplementary Figure 37.  $^{13}\text{C}$  NMR of **6**

Chiral HPLC trace of *rac*-**6** (bottom) and (*R,R*)-**6** (top, 99% *ee*); Method: Lux<sup>®</sup> Cellulose-1, hexane:isopropanol 75:25 v/v, 0.8 mL/min

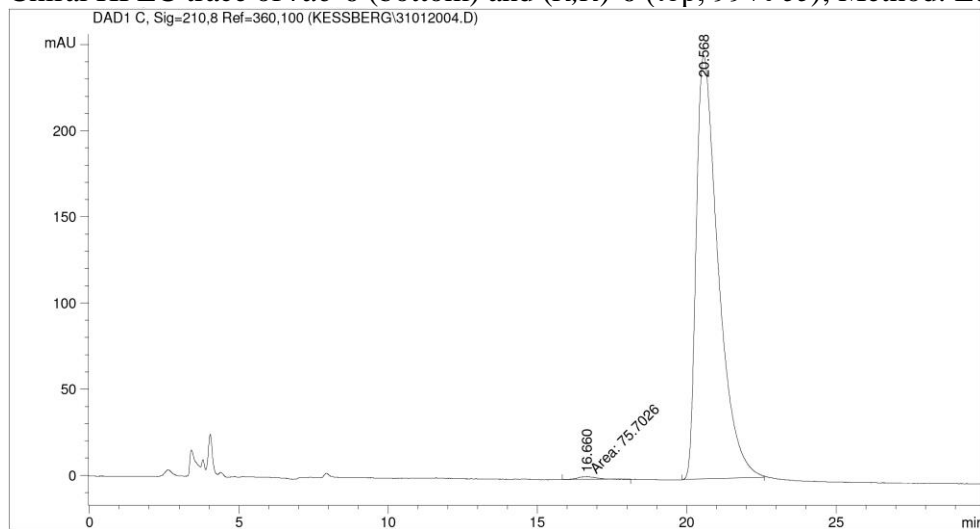

| Peak # | RetTime [min] | Type | Width [min] | Area [mAU*s] | Height [mAU] | Area %  |
|--------|---------------|------|-------------|--------------|--------------|---------|
| 1      | 16.660        | MM T | 0.7617      | 75.70261     | 1.65652      | 0.5988  |
| 2      | 20.568        | PB   | 0.7544      | 1.25674e4    | 245.83195    | 99.4012 |

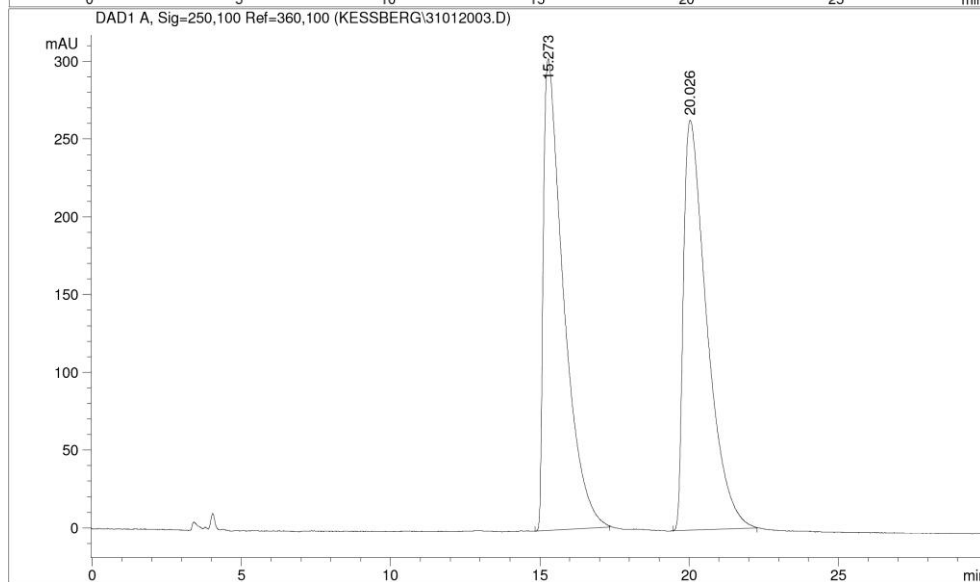



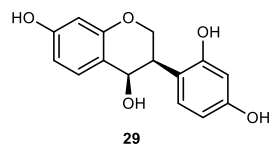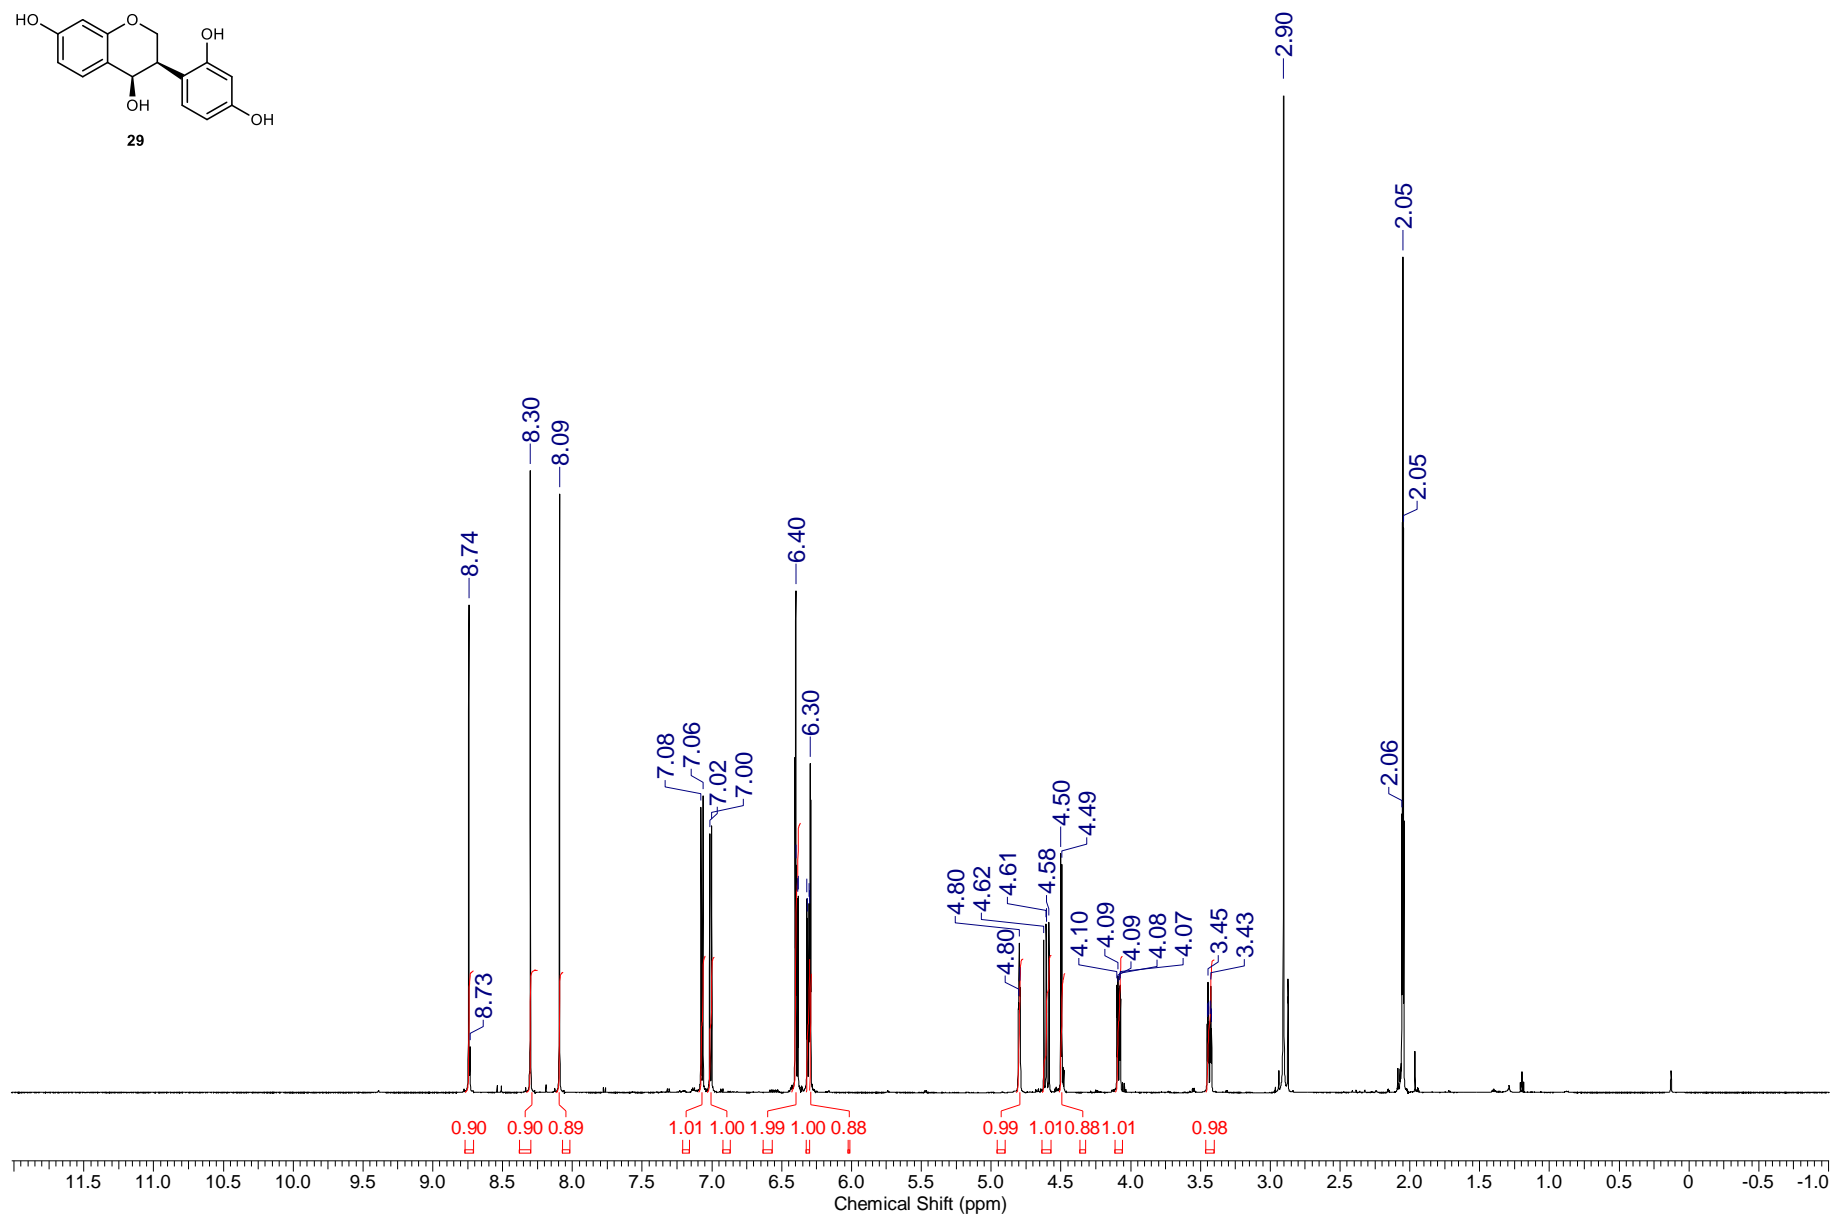

Supplementary Figure 39.  $^1\text{H}$  NMR of 29

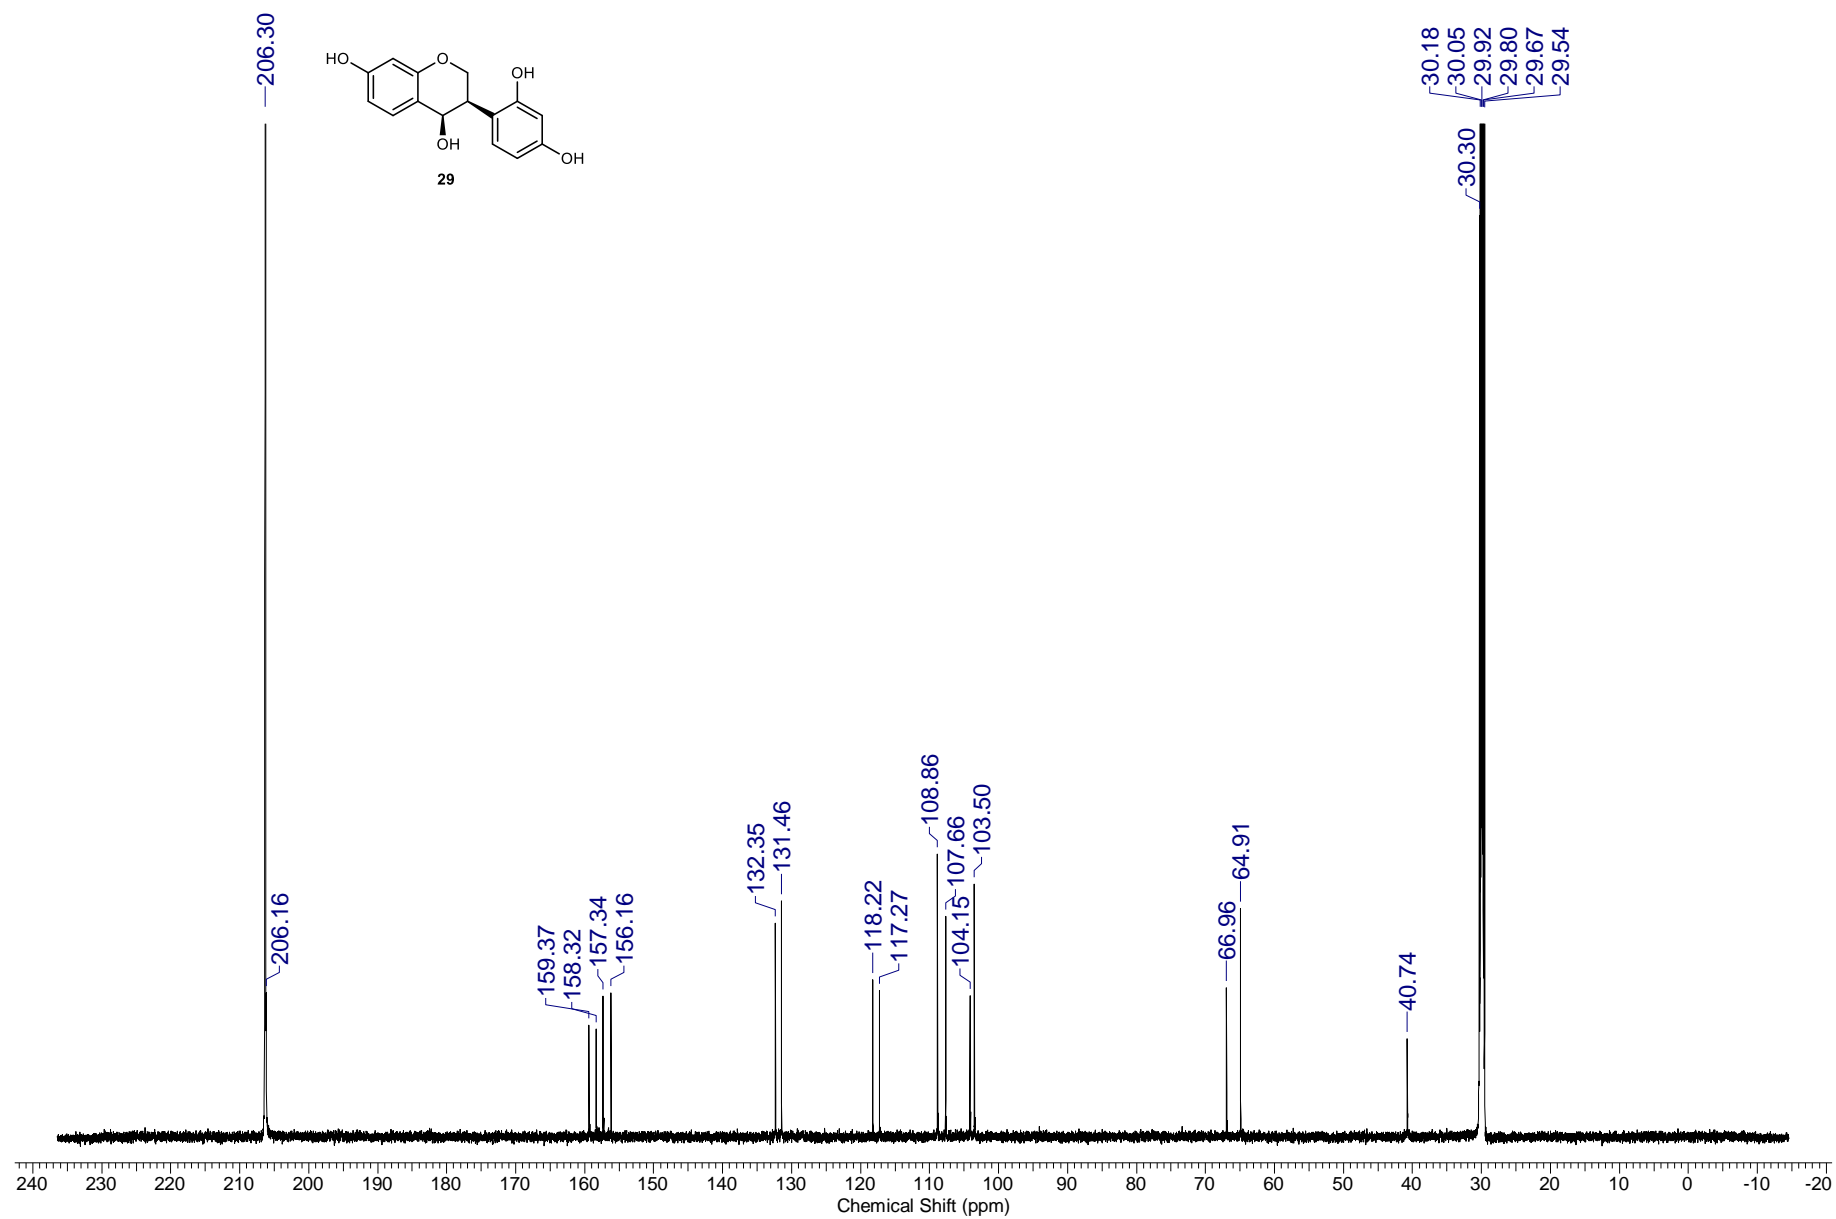

Supplementary Figure 40. <sup>13</sup>C NMR of 29

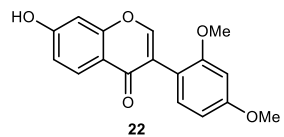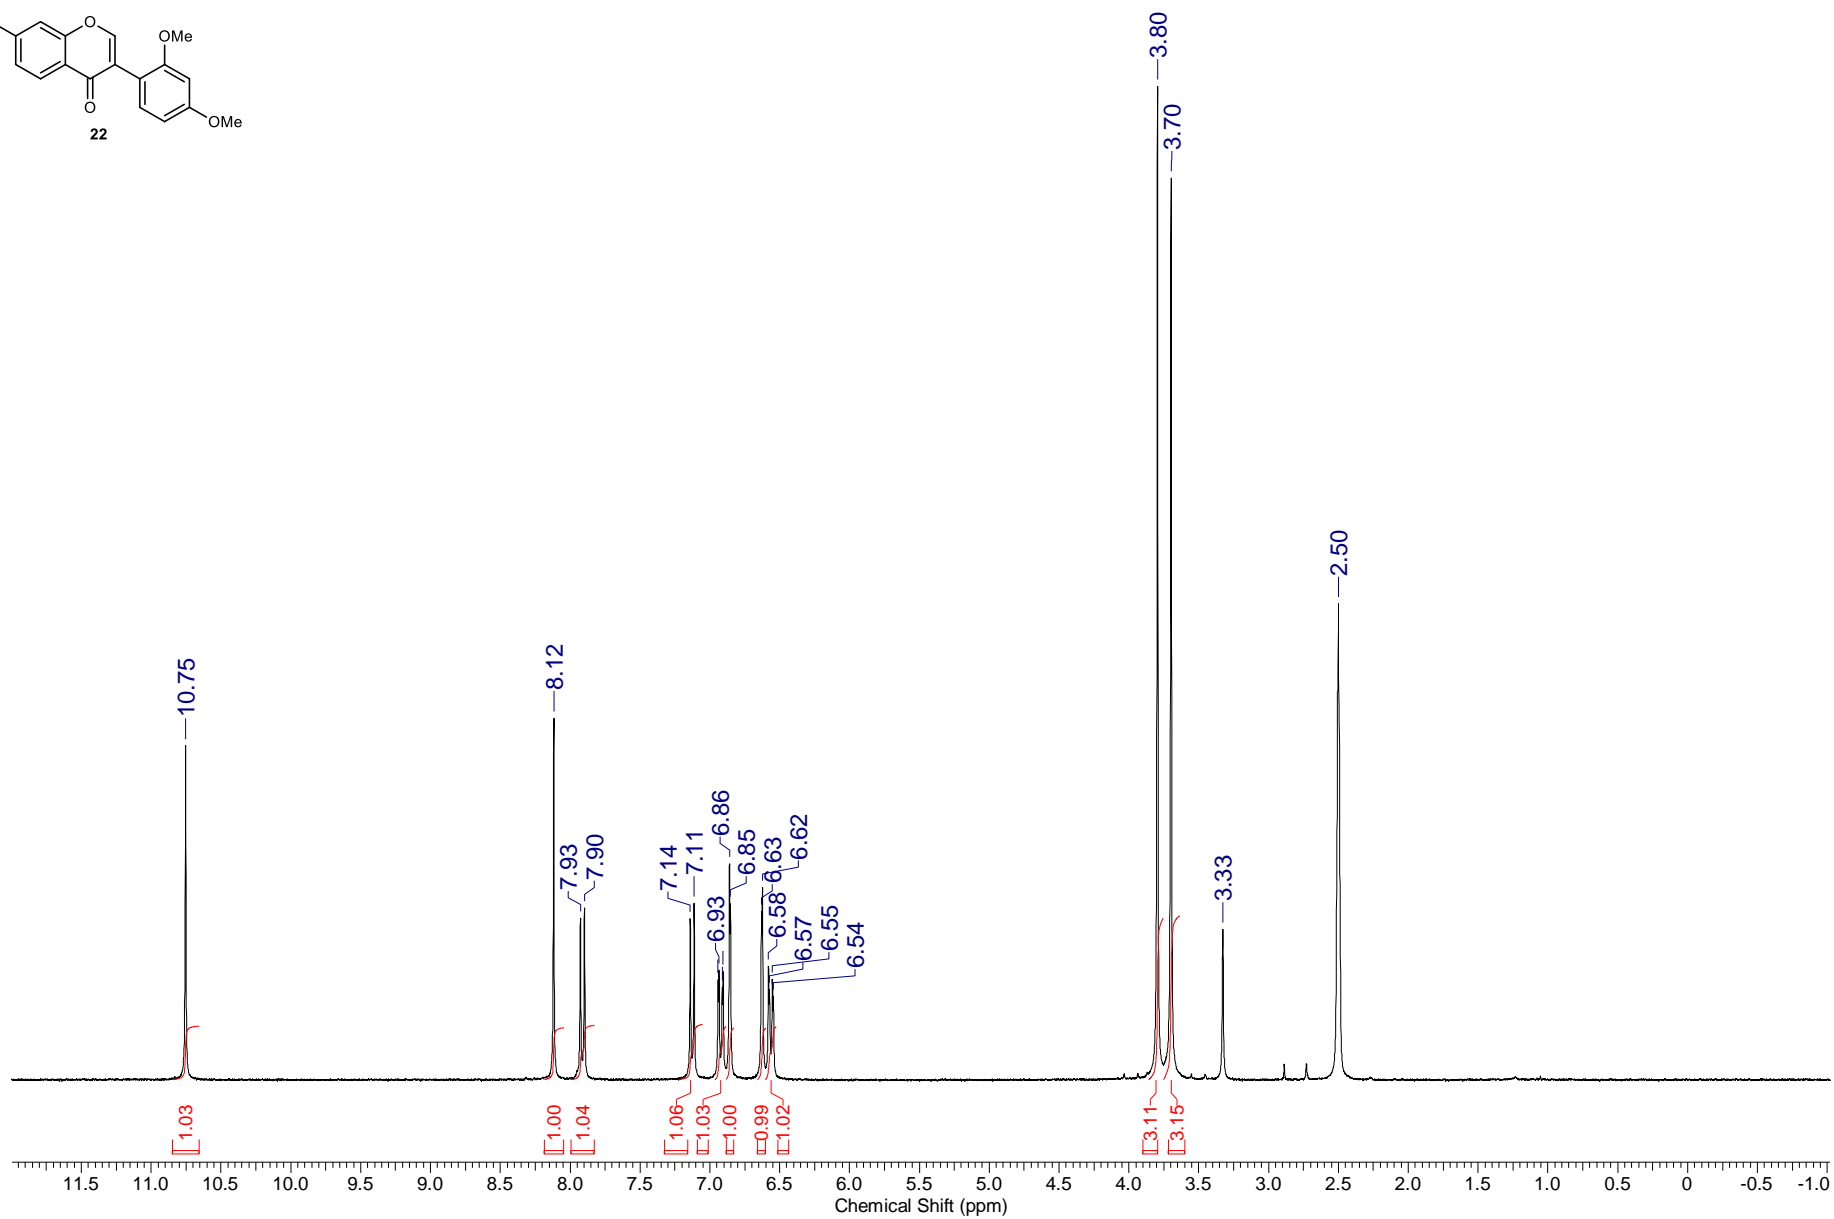

Supplementary Figure 41.  $^1\text{H}$  NMR of 22

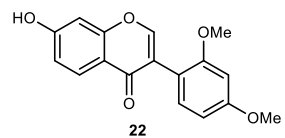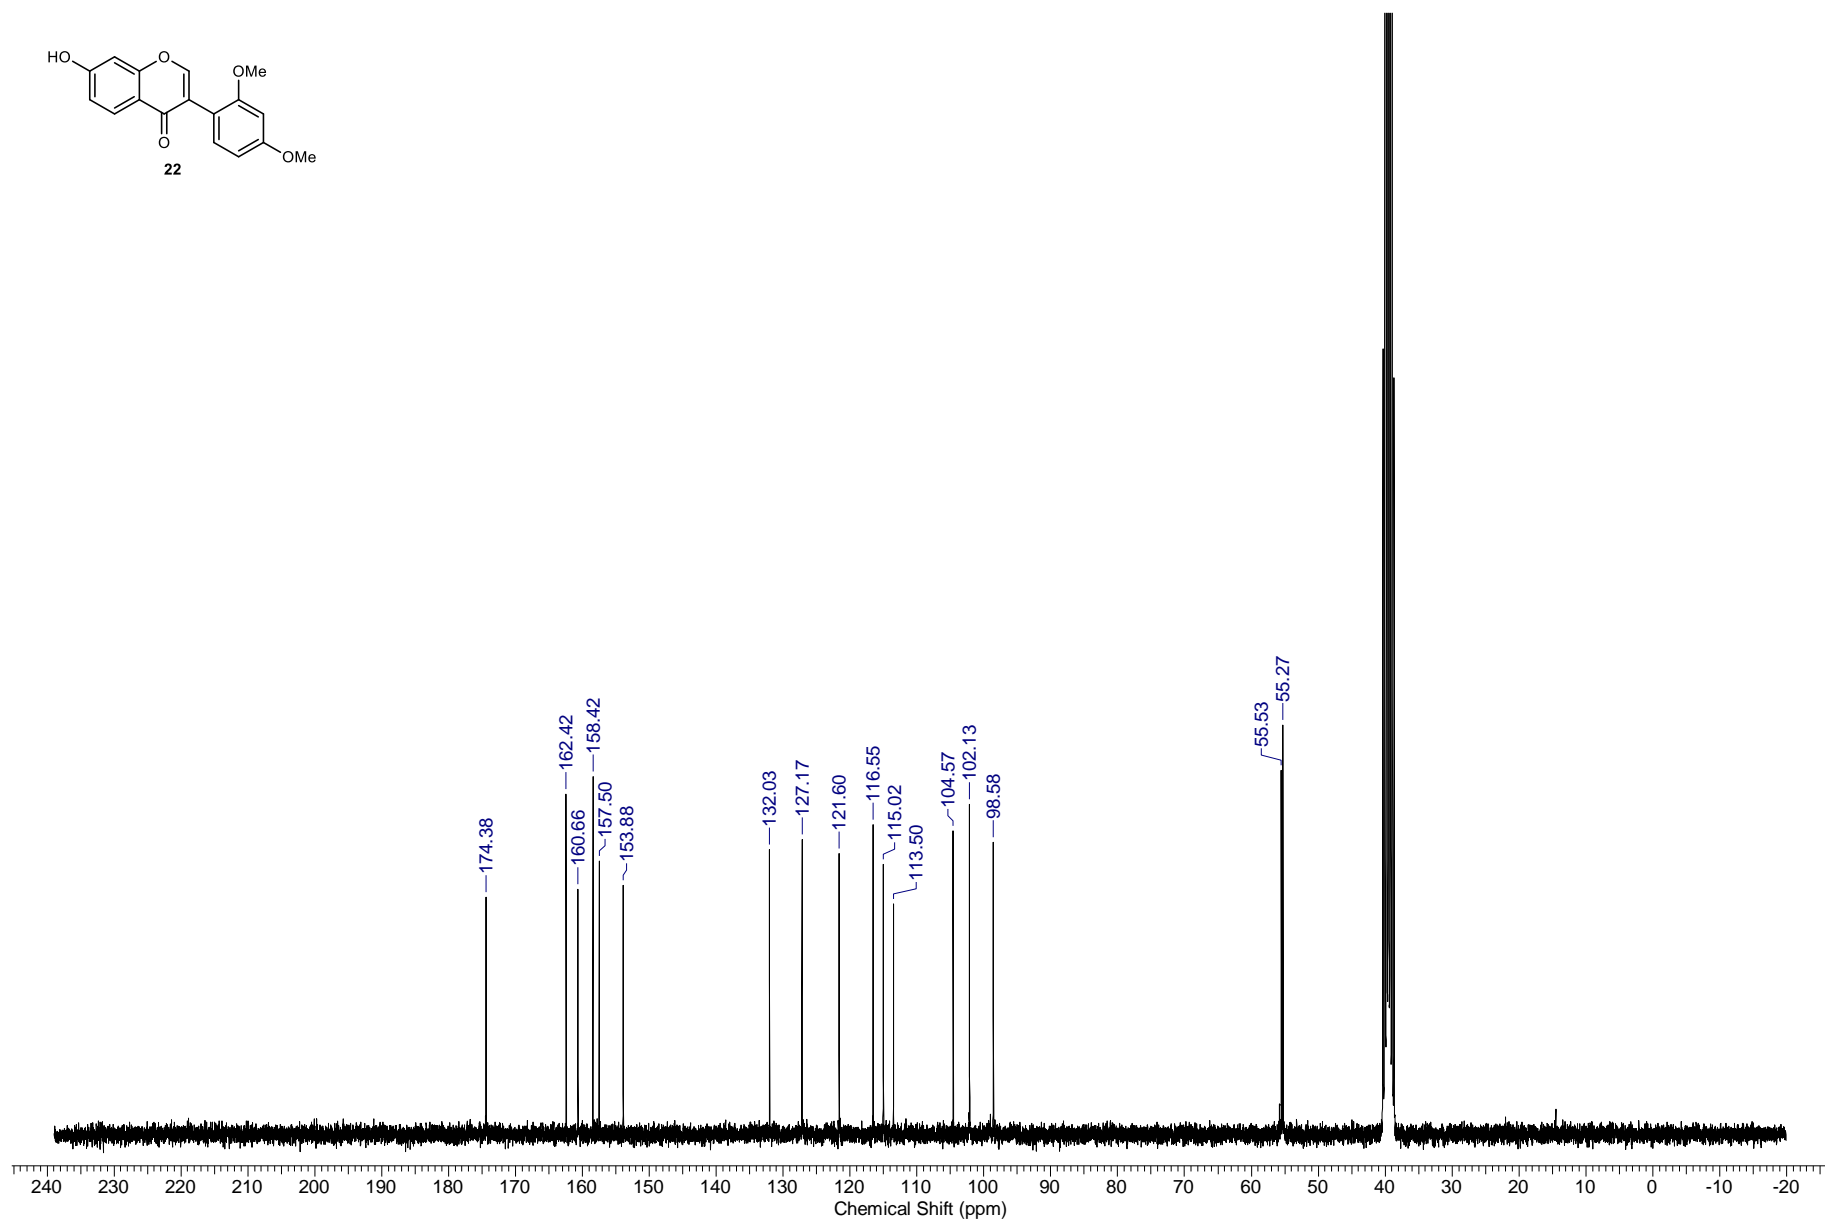

Supplementary Figure 42. <sup>13</sup>C NMR of 22

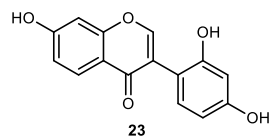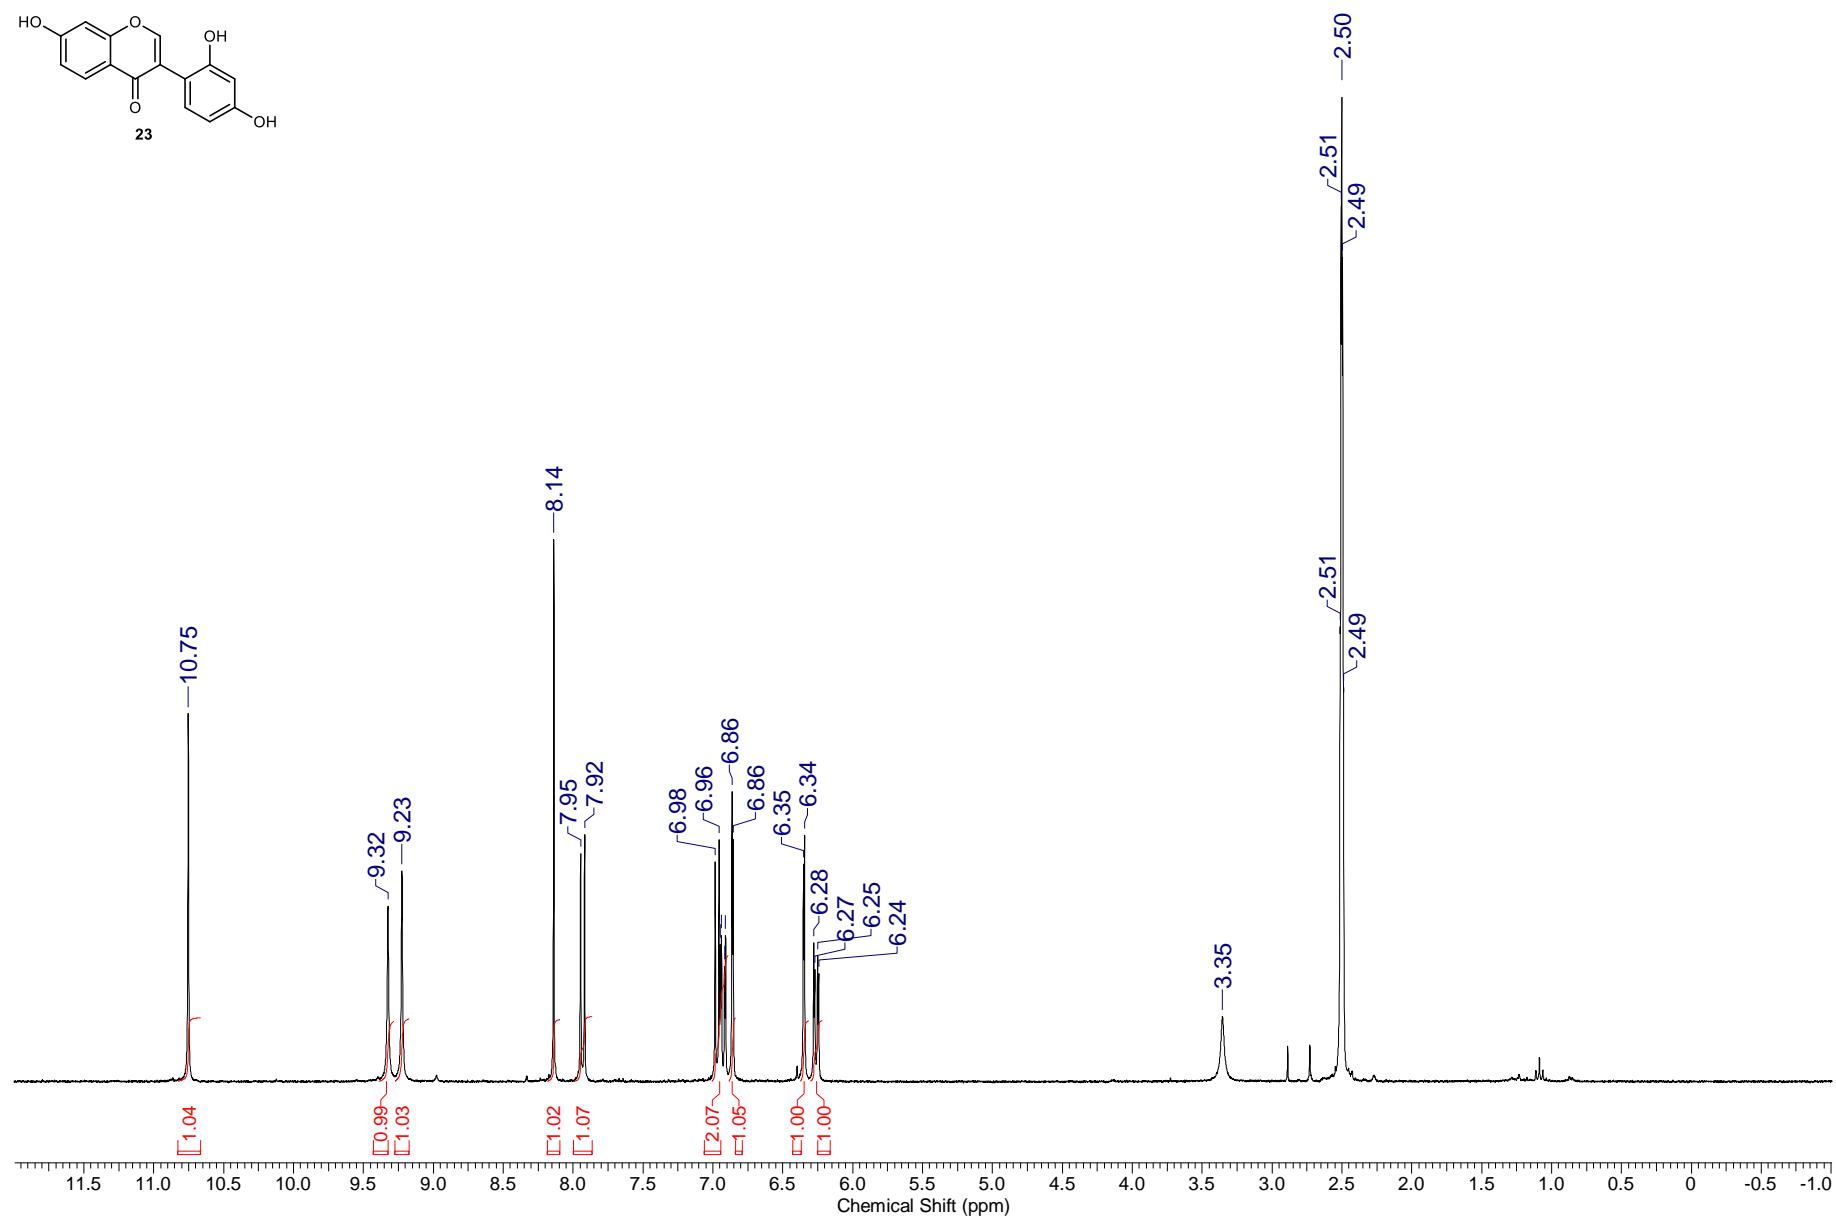

Supplementary Figure 43.  $^1\text{H}$  NMR of 23

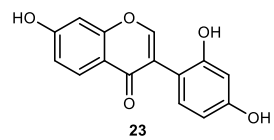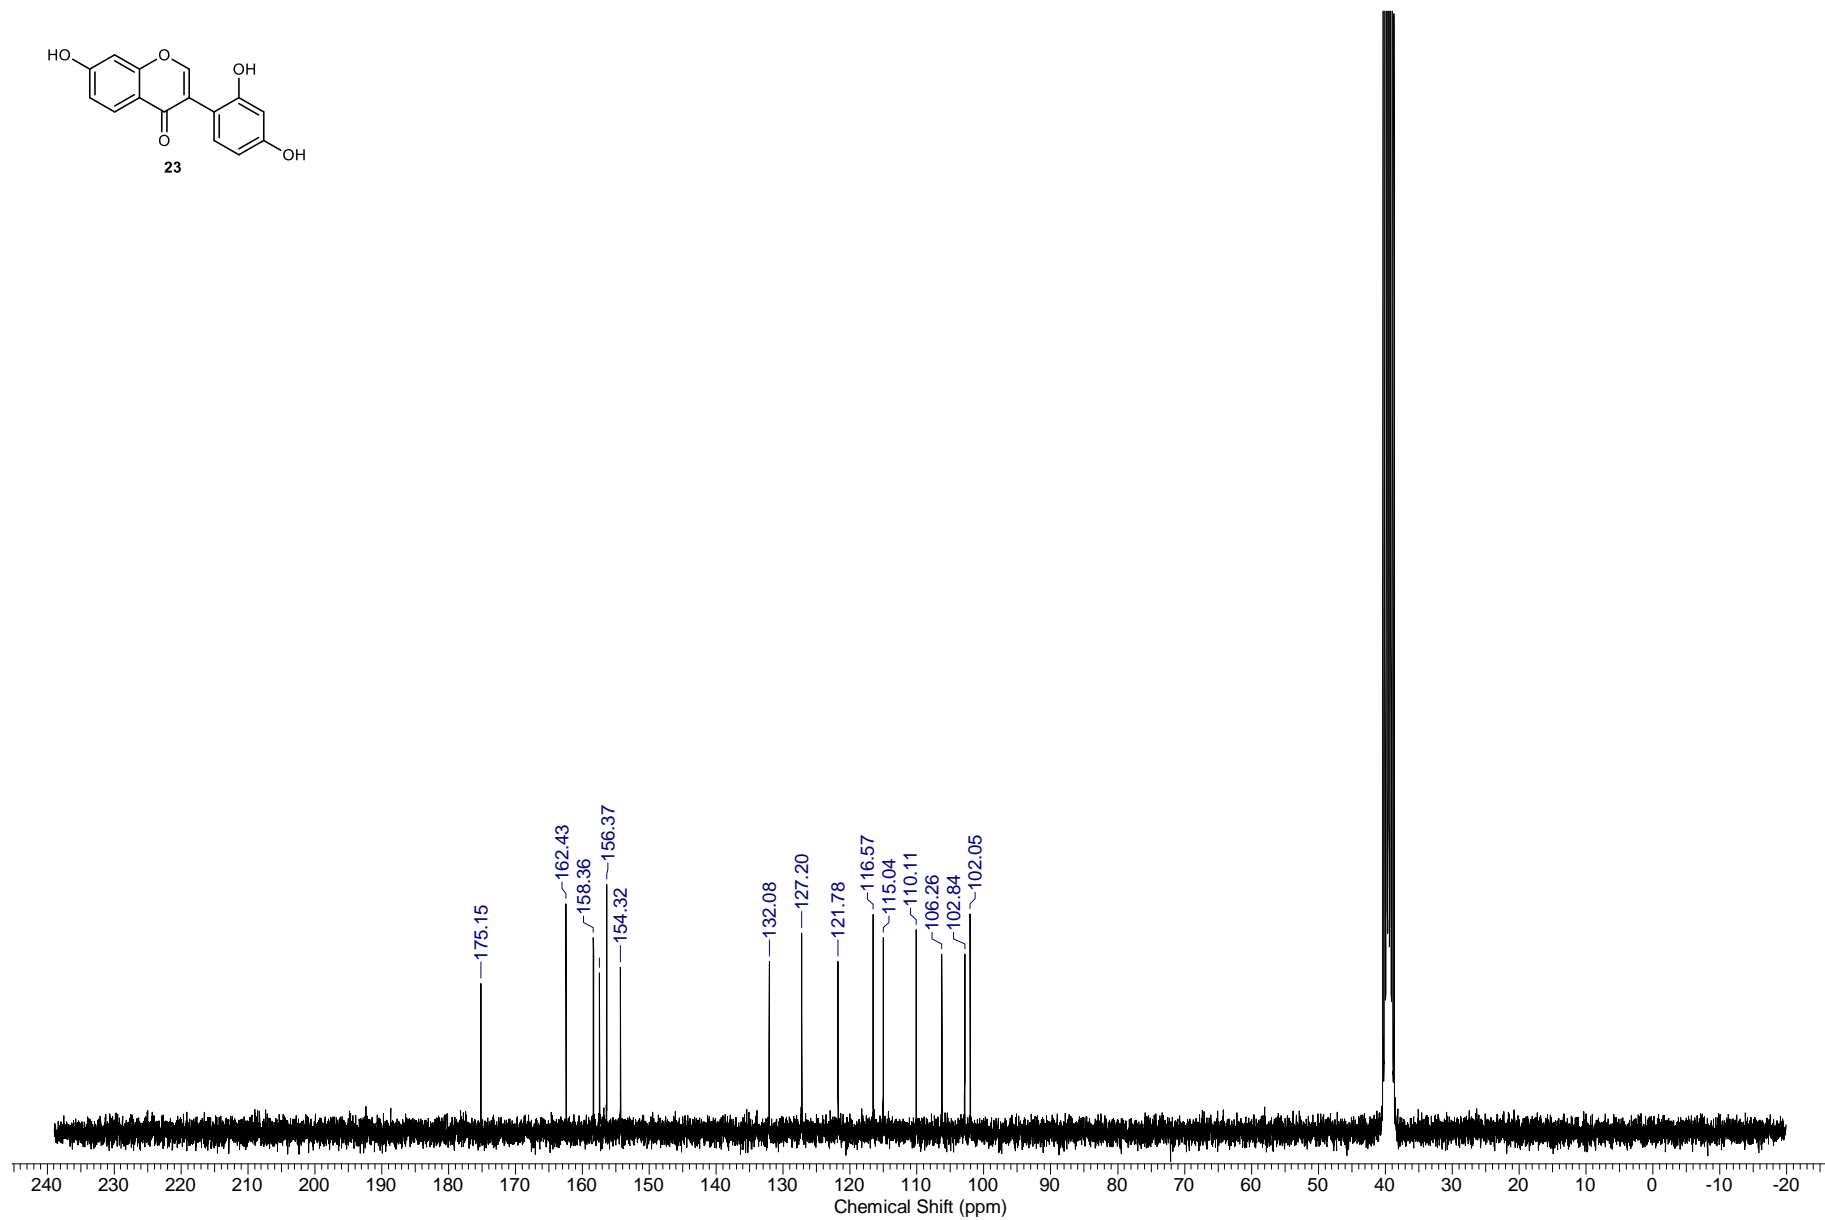

Supplementary Figure 44.  $^{13}\text{C}$  NMR of 23

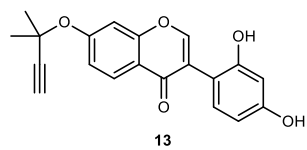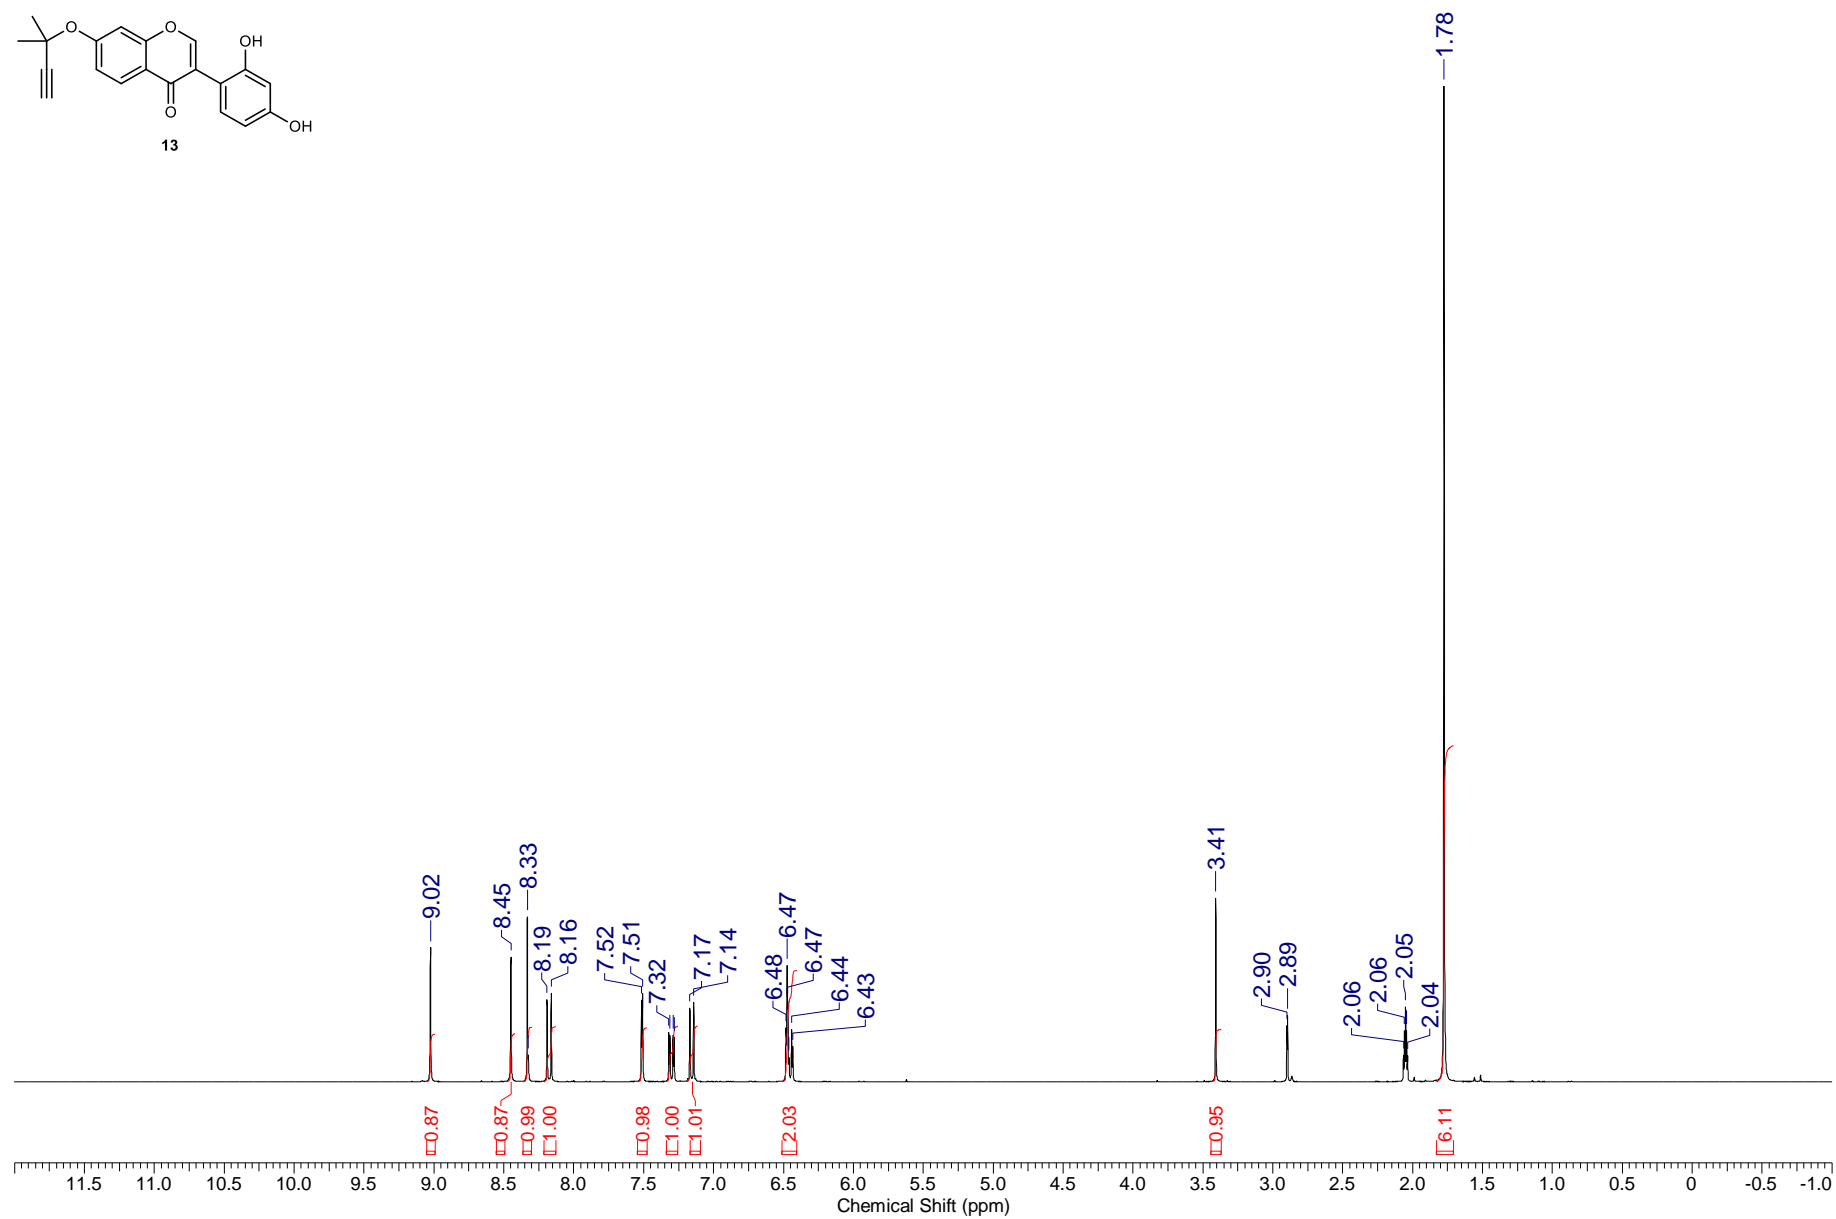

Supplementary Figure 45.  $^1\text{H}$  NMR of 13

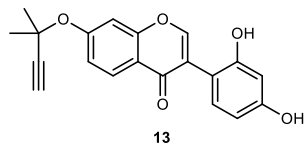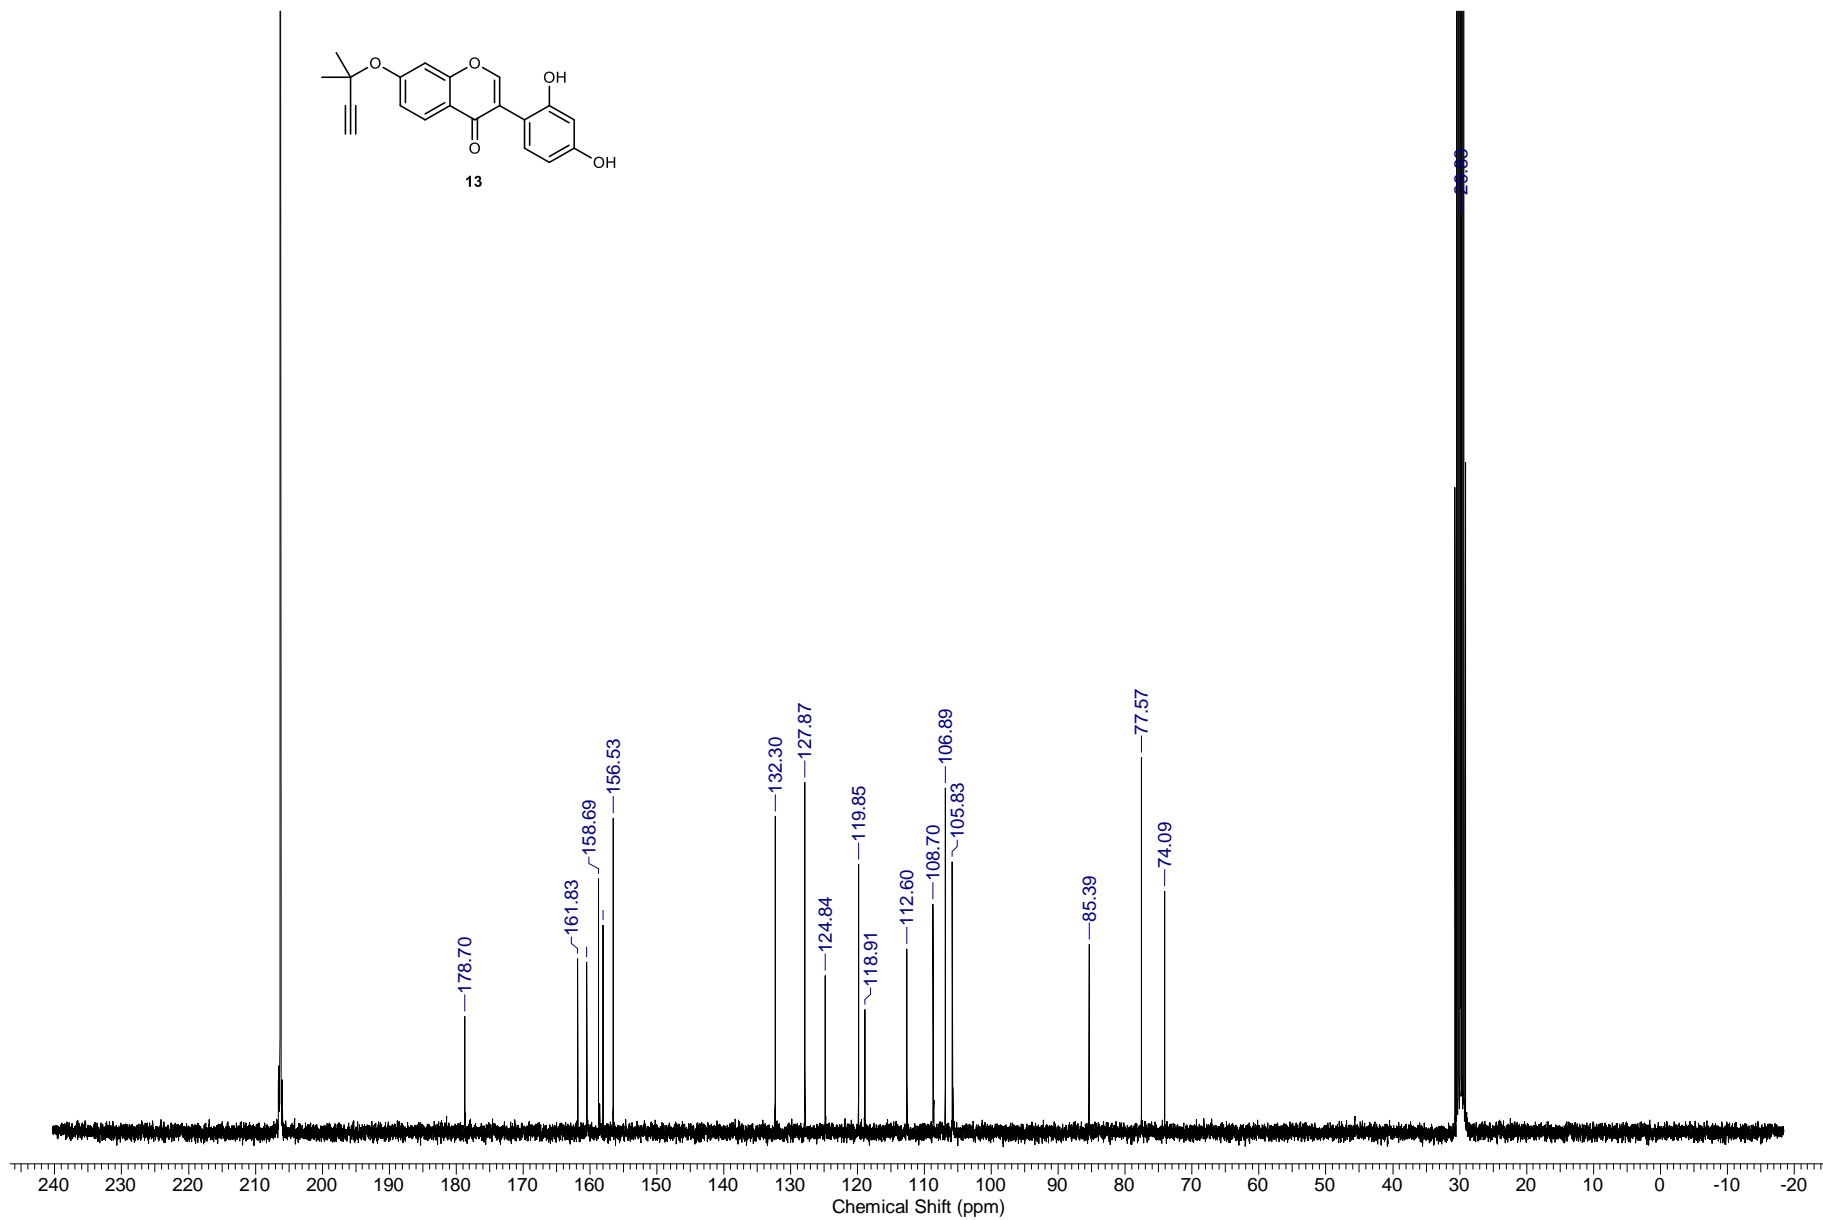

Supplementary Figure 46. <sup>13</sup>C NMR of 13



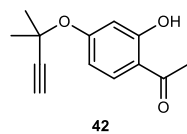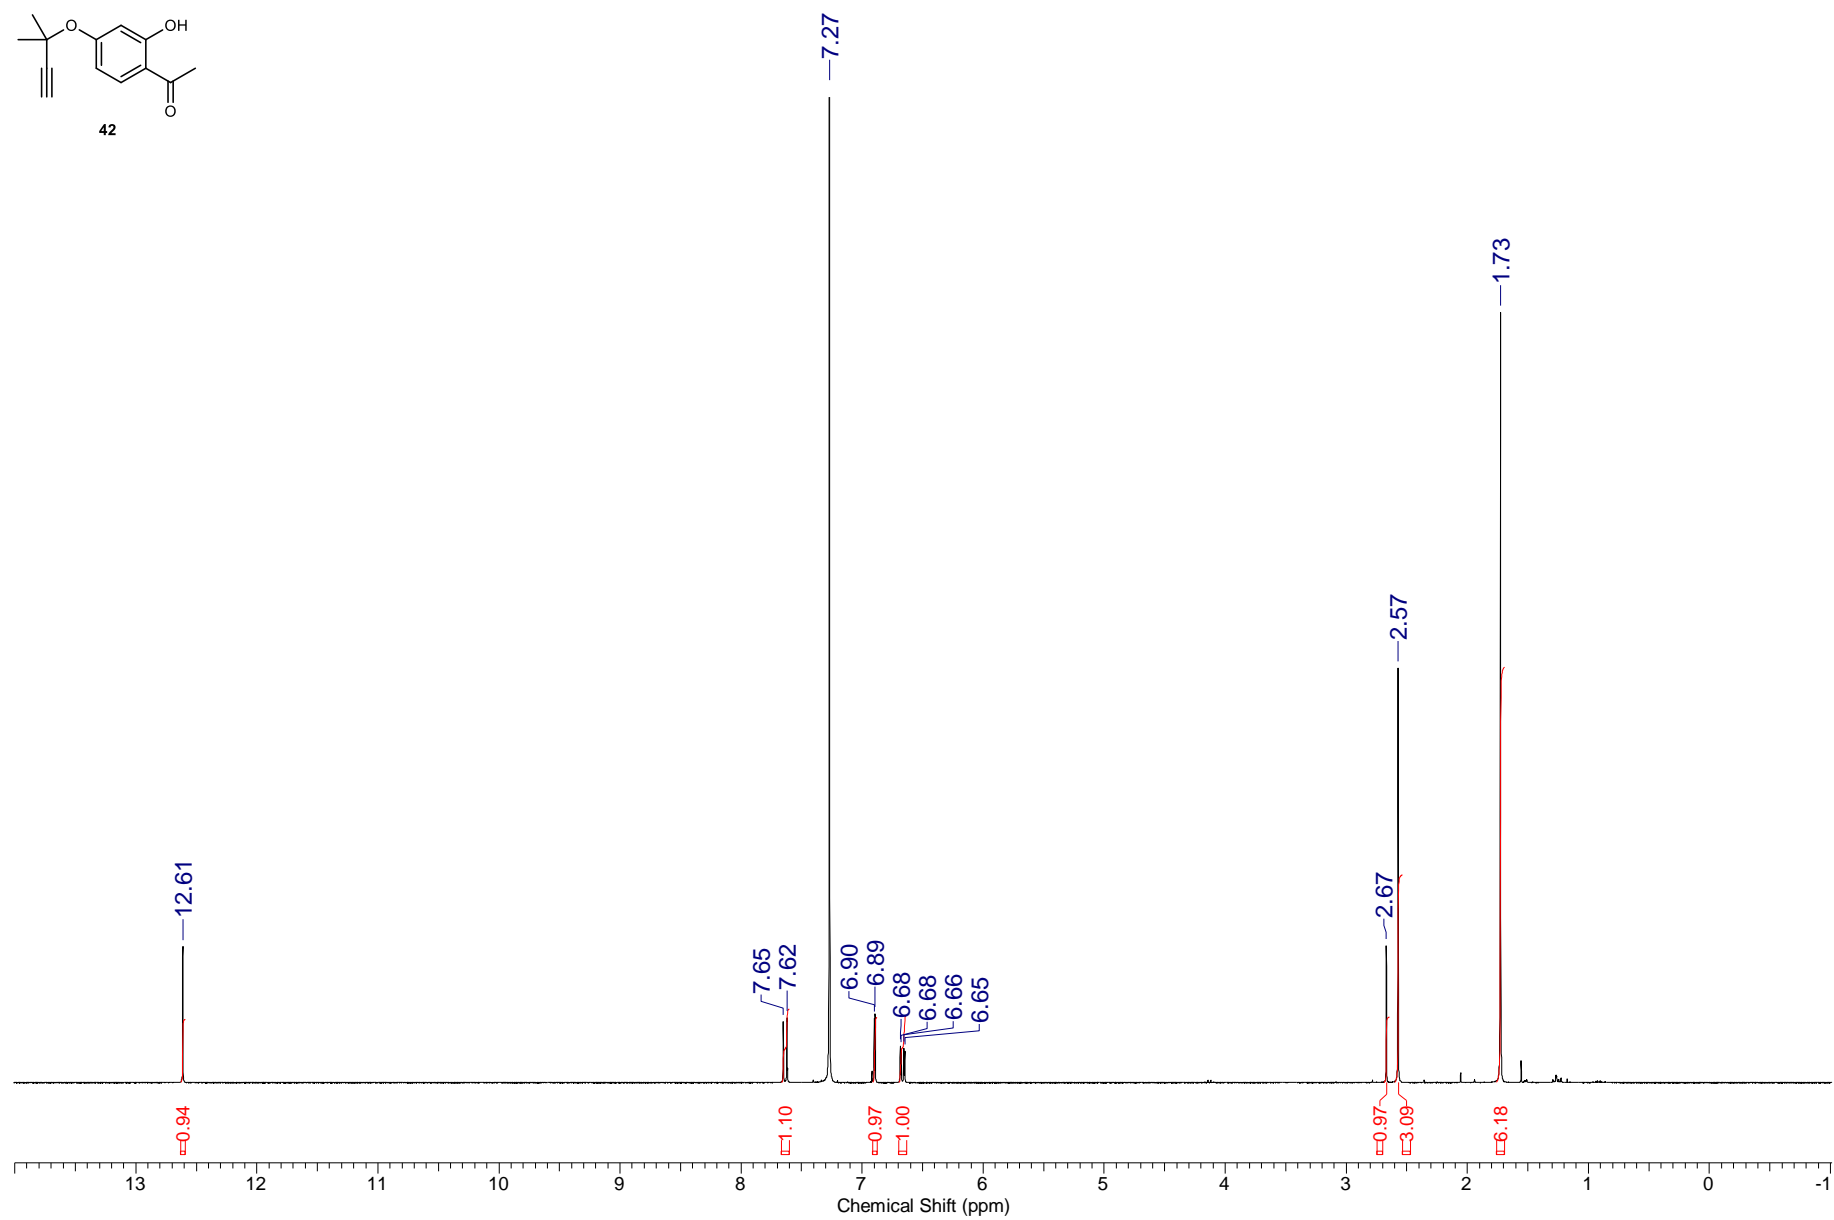

Supplementary Figure 47. <sup>1</sup>H NMR of 42

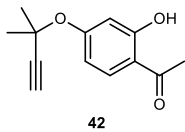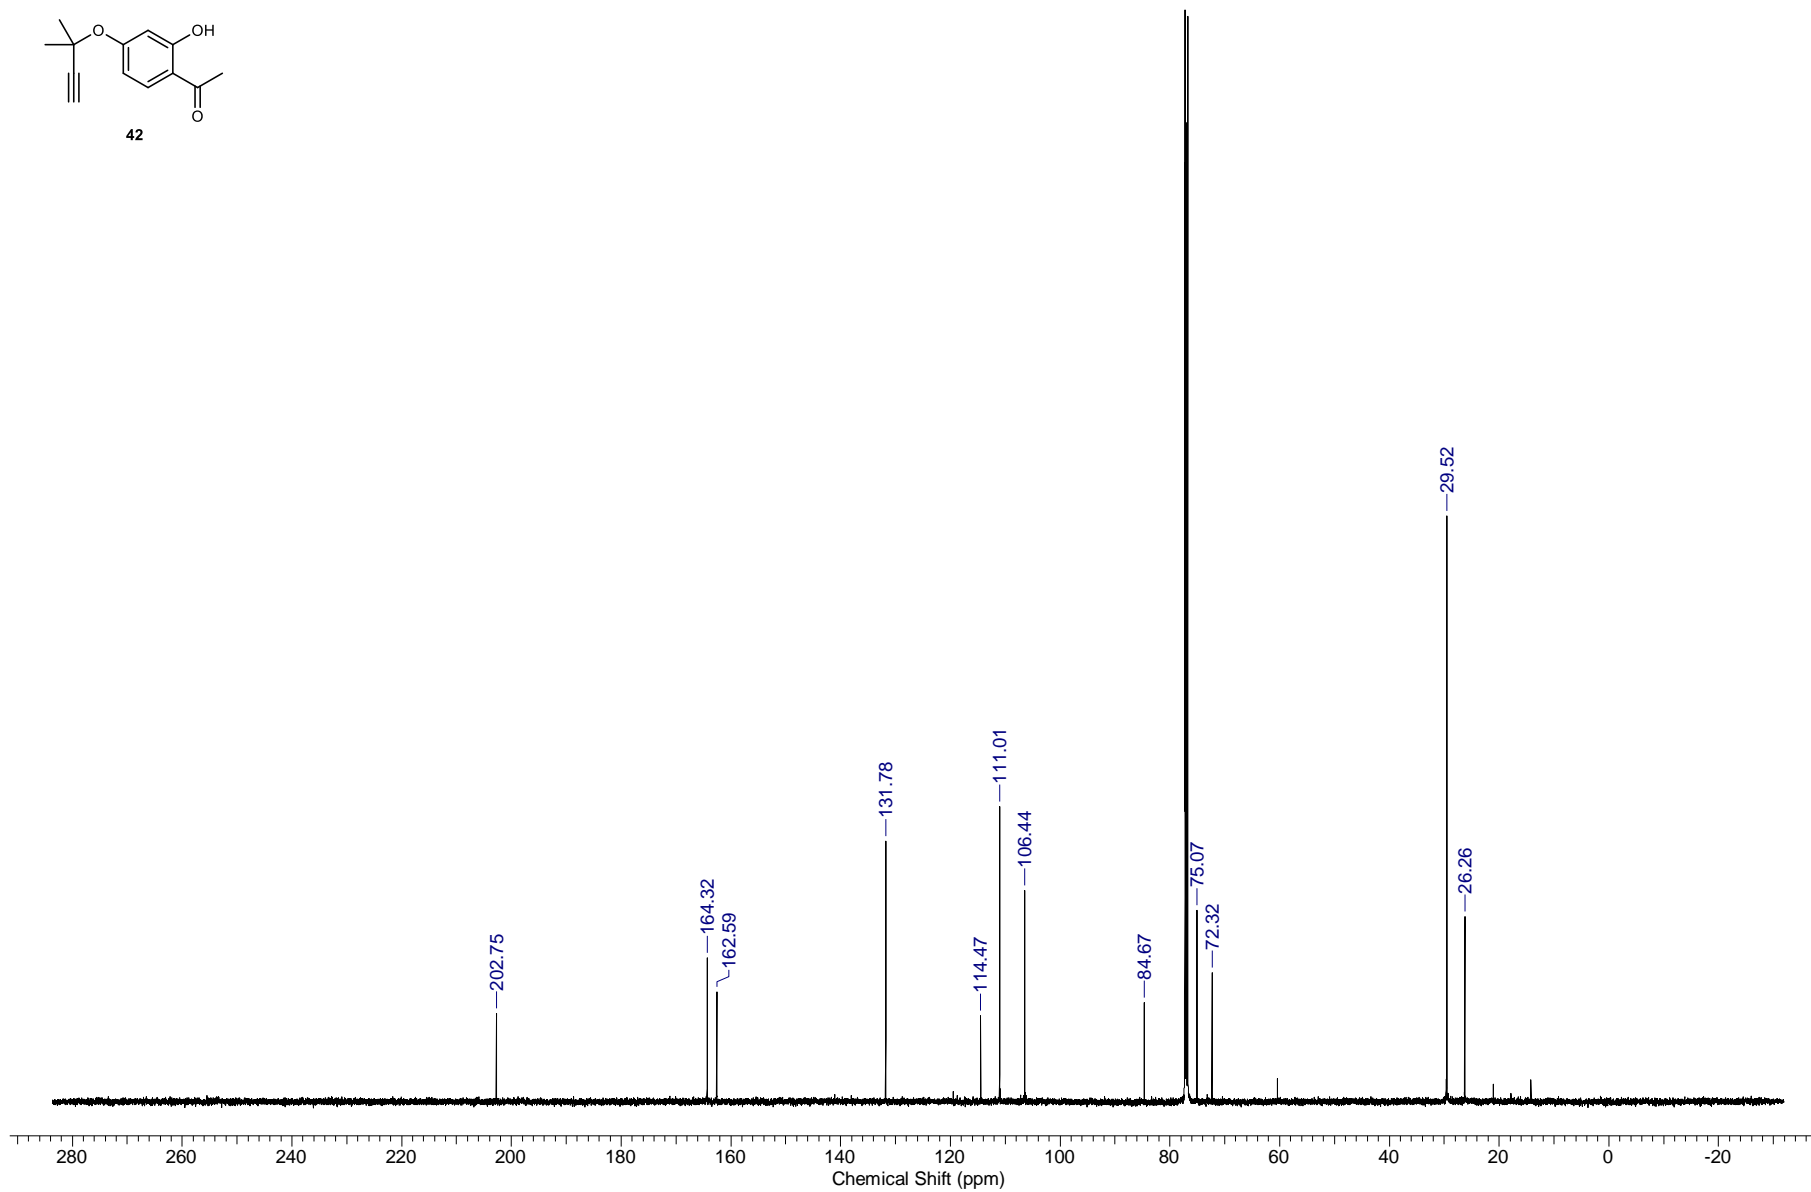

Supplementary Figure 48.  $^{13}\text{C}$  NMR of 42

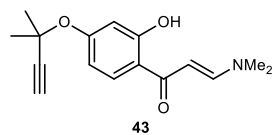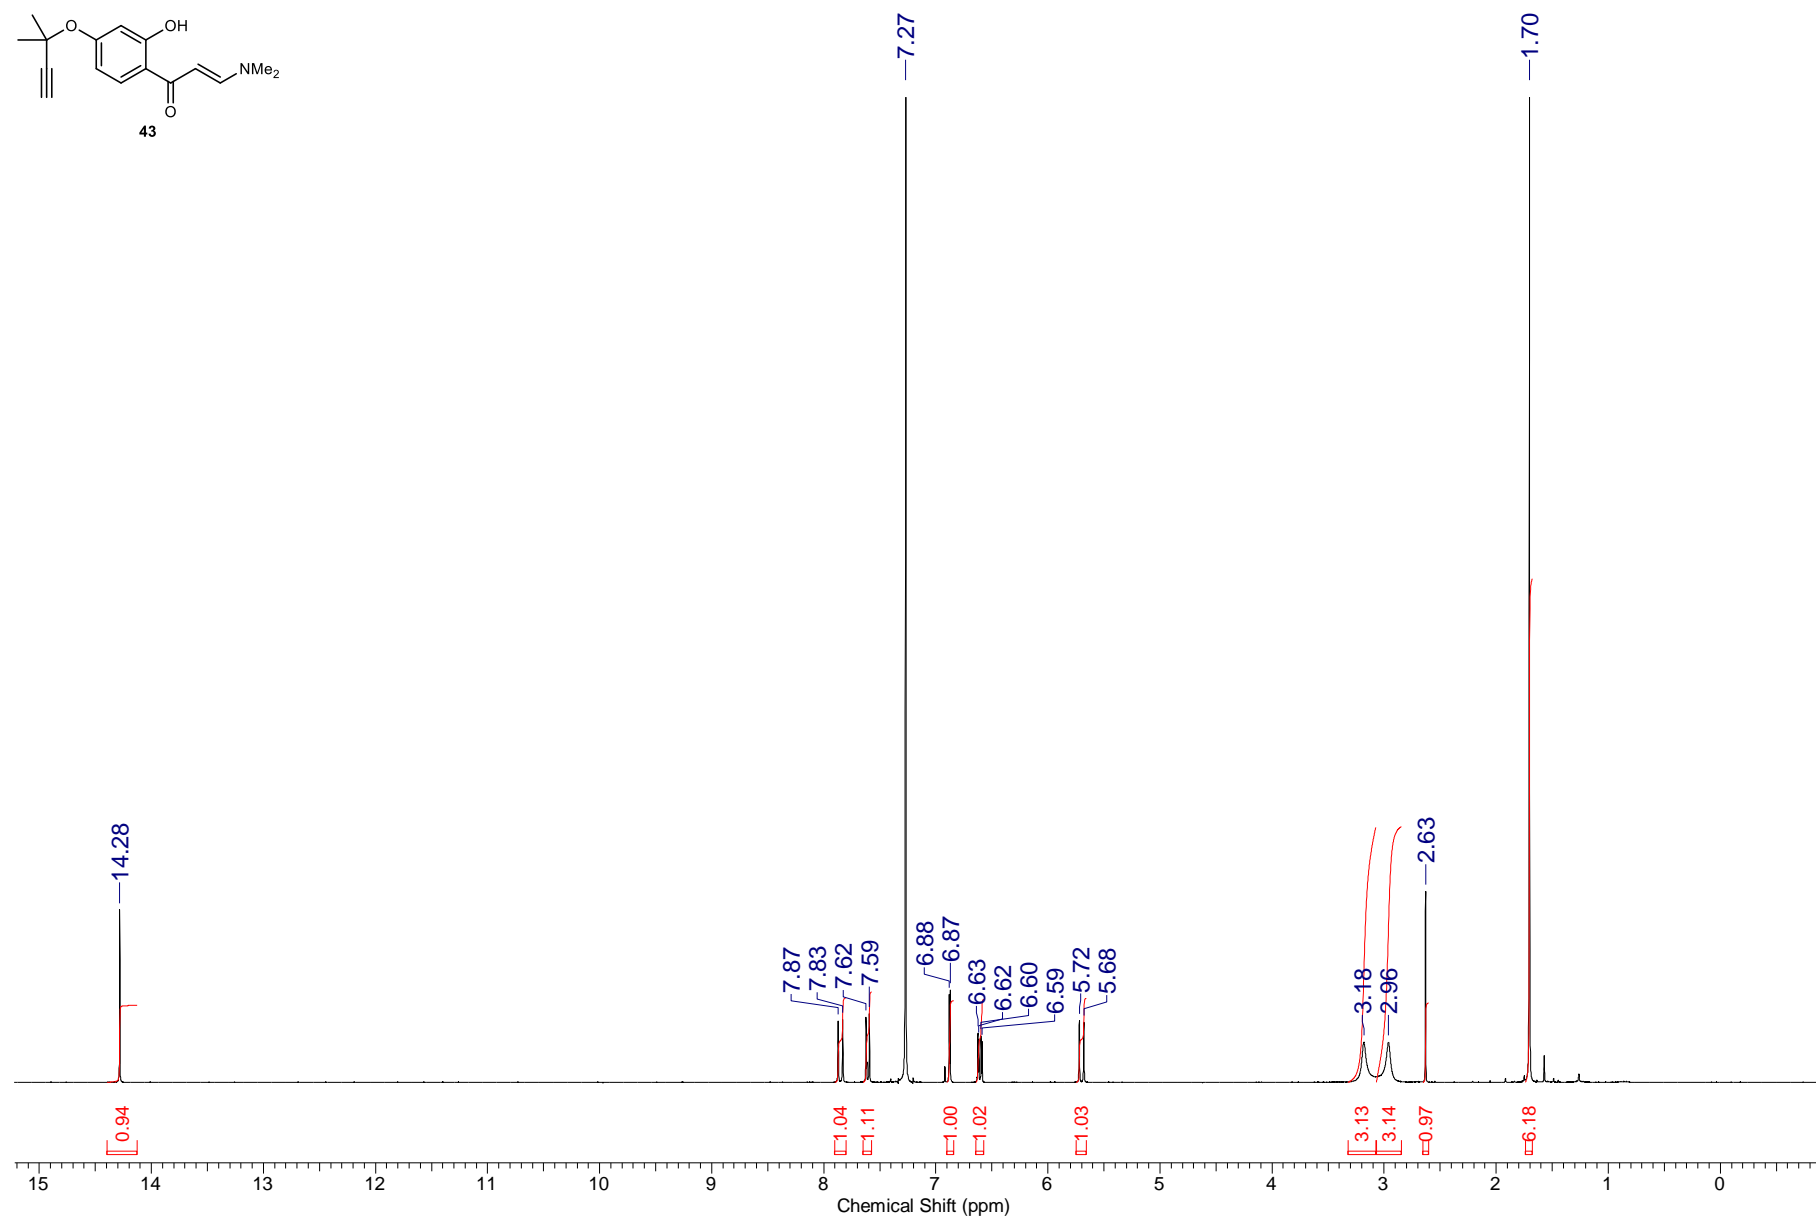

Supplementary Figure 49. <sup>1</sup>H NMR of 43

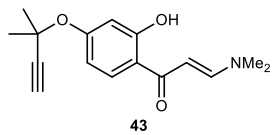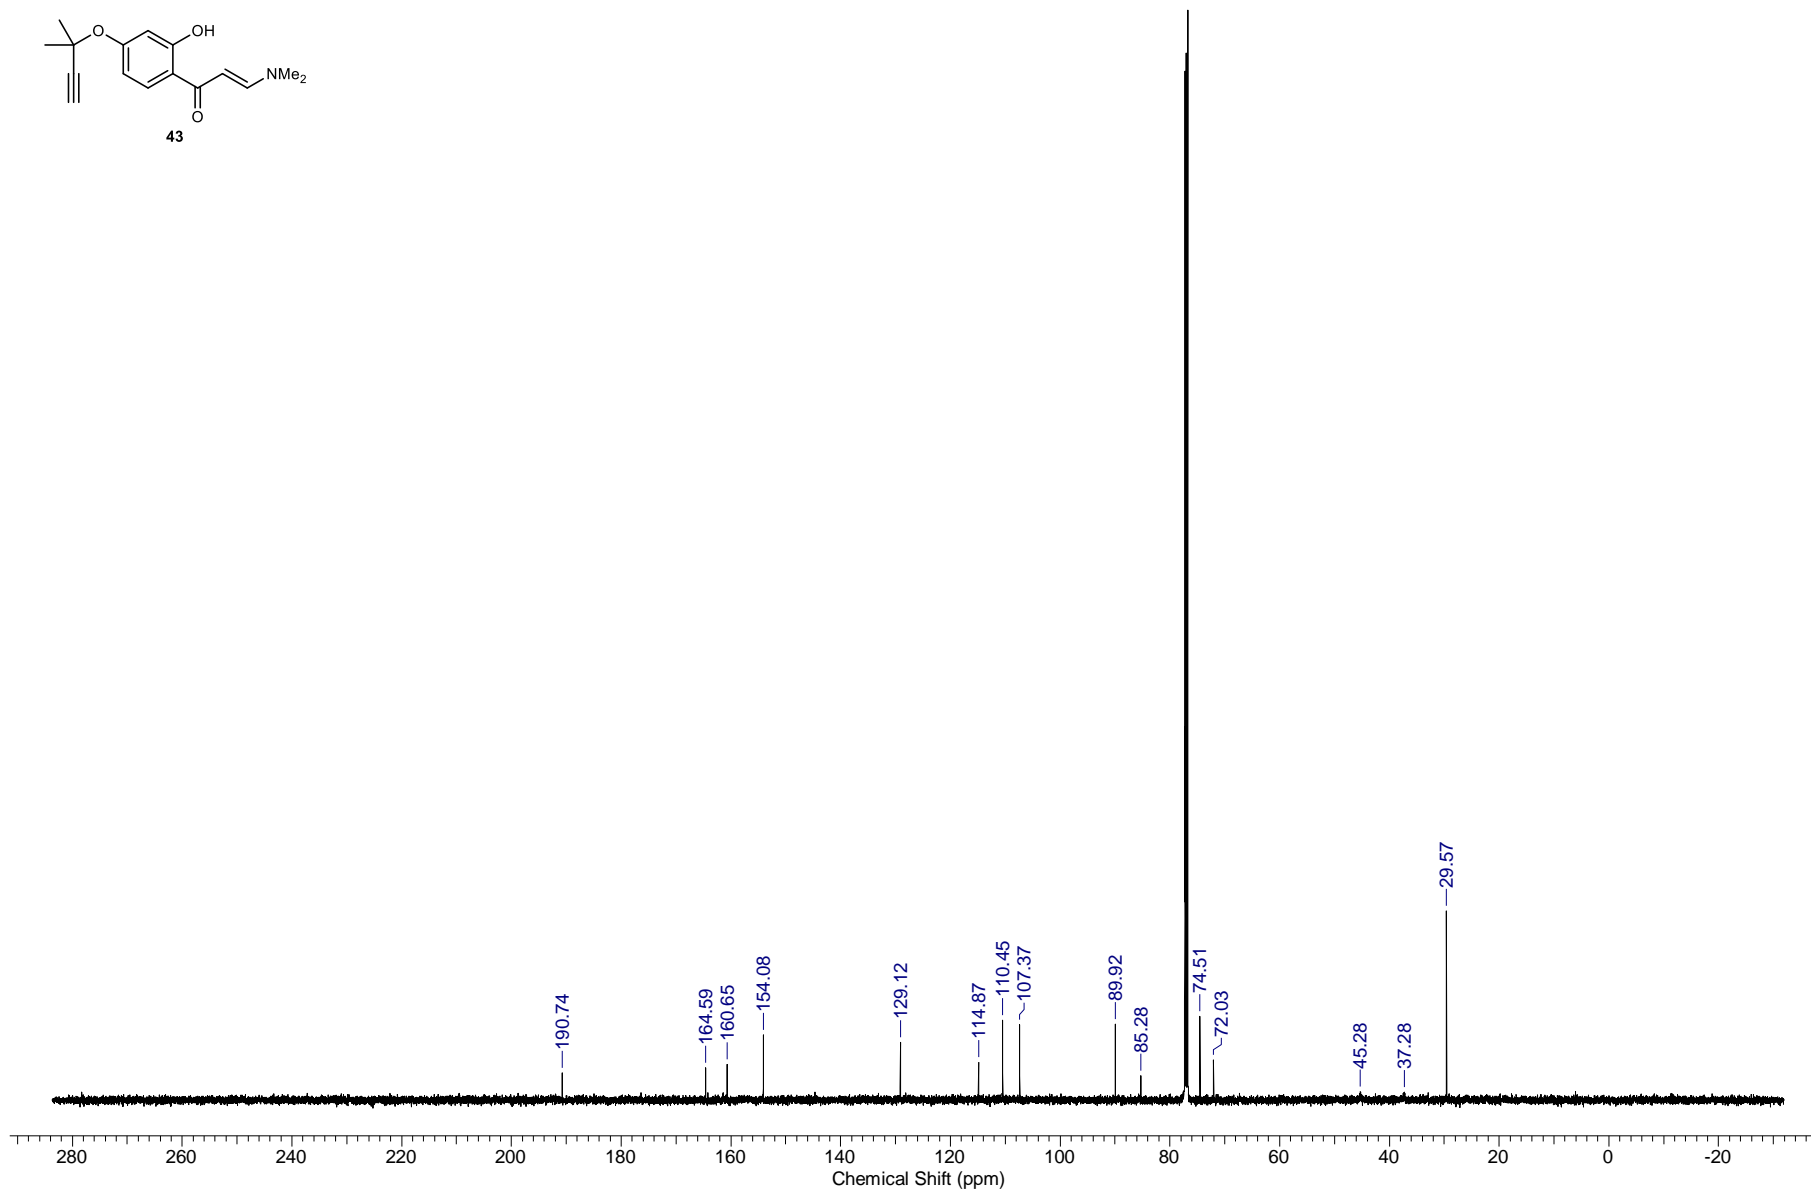

Supplementary Figure 50.  $^{13}\text{C}$  NMR of **43**

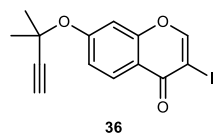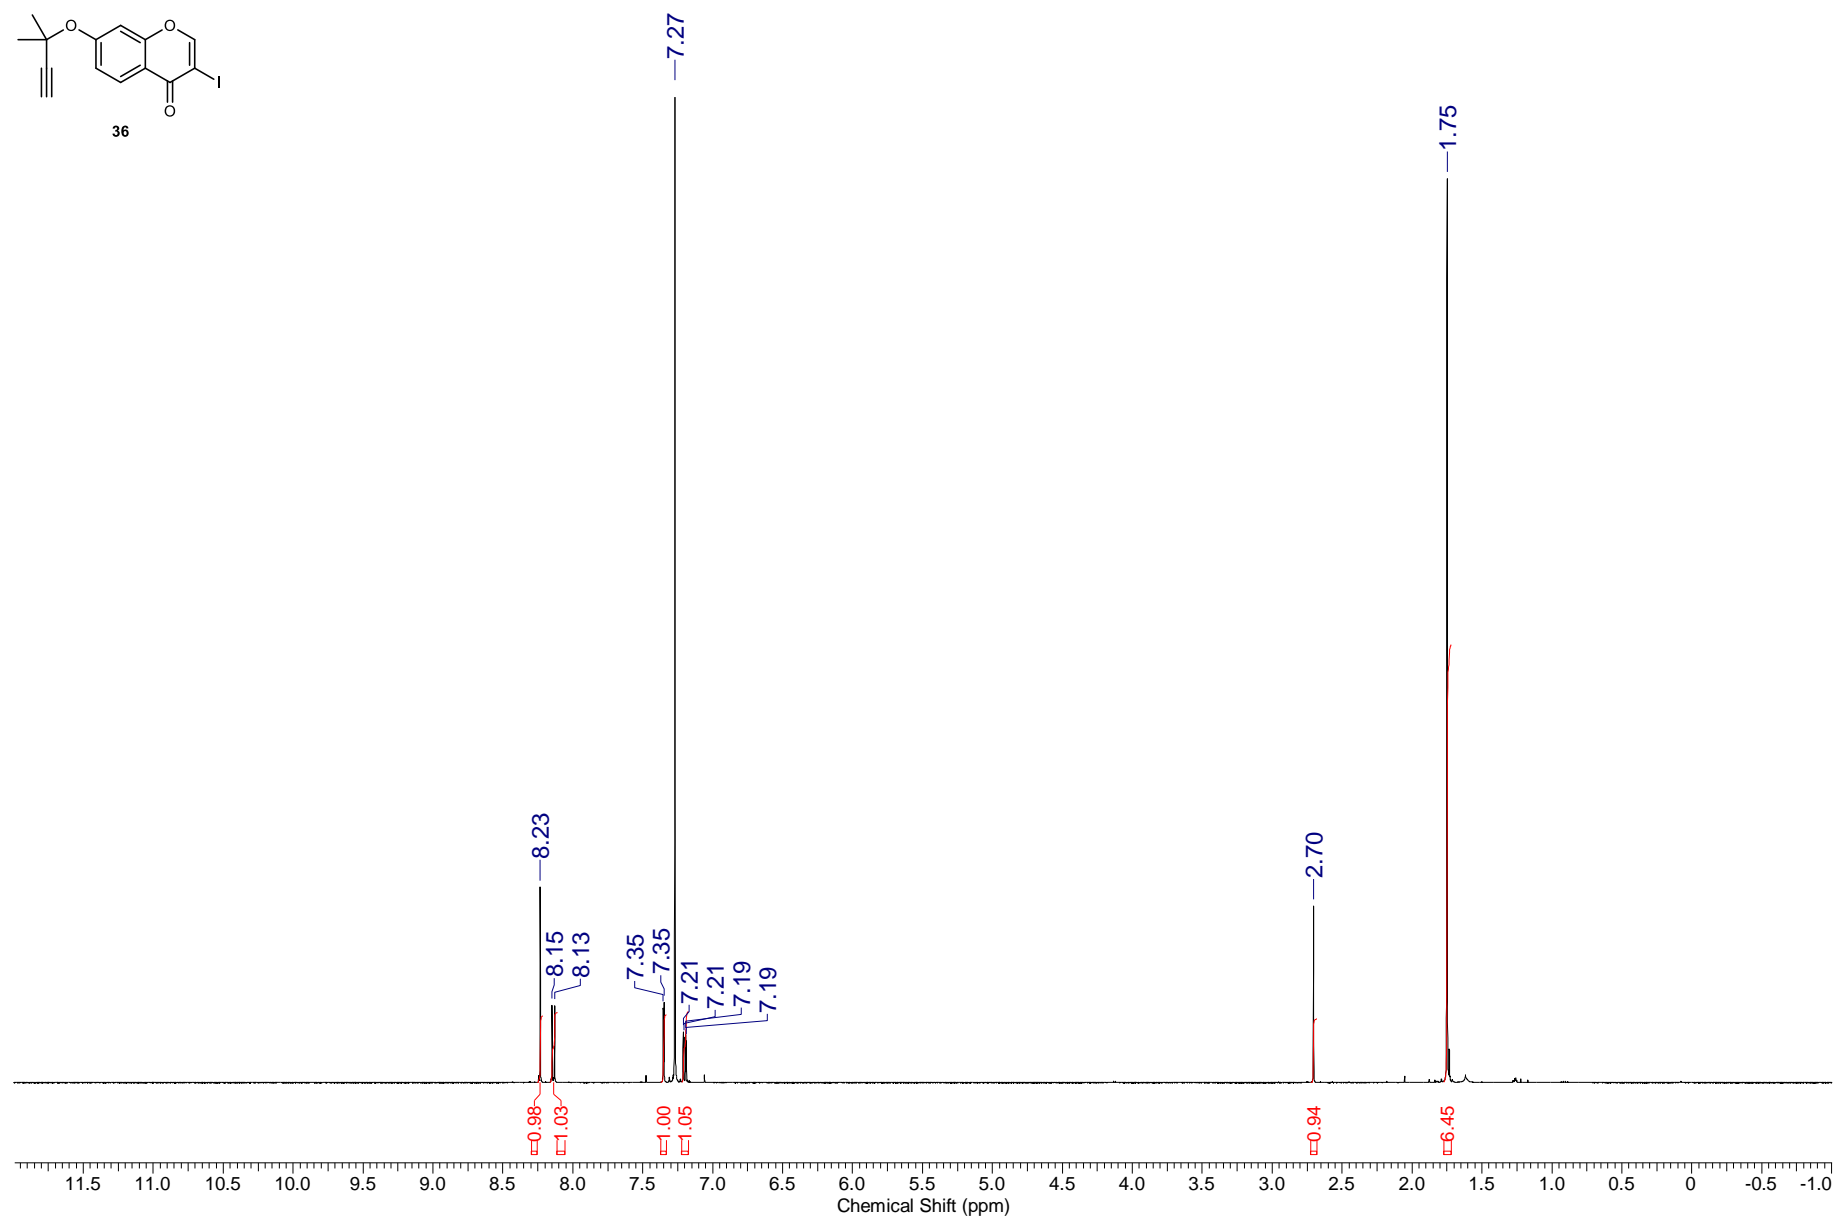

Supplementary Figure 51. <sup>1</sup>H NMR of 36

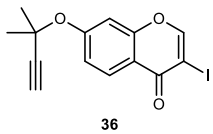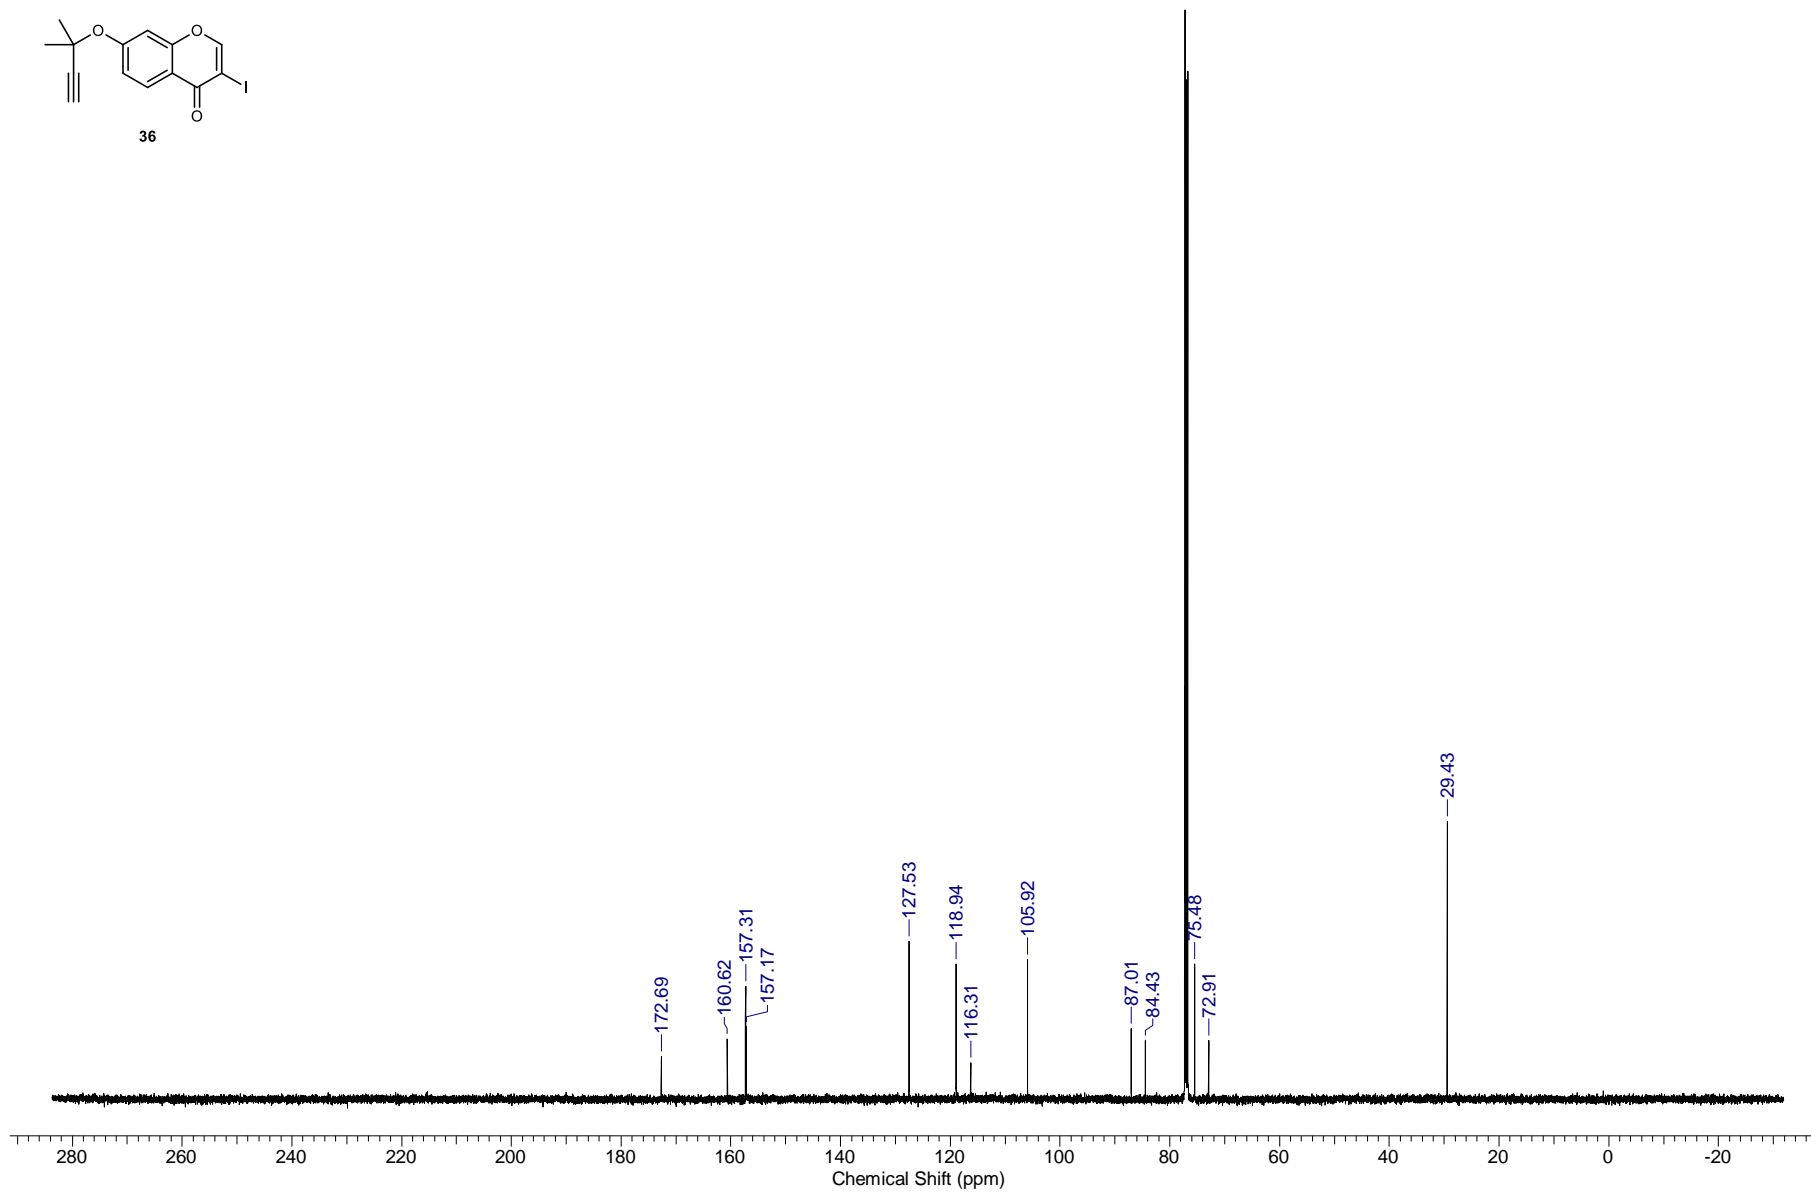

Supplementary Figure 52.  $^{13}\text{C}$  NMR of **36**

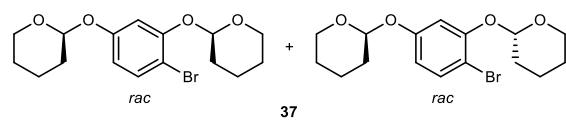

37

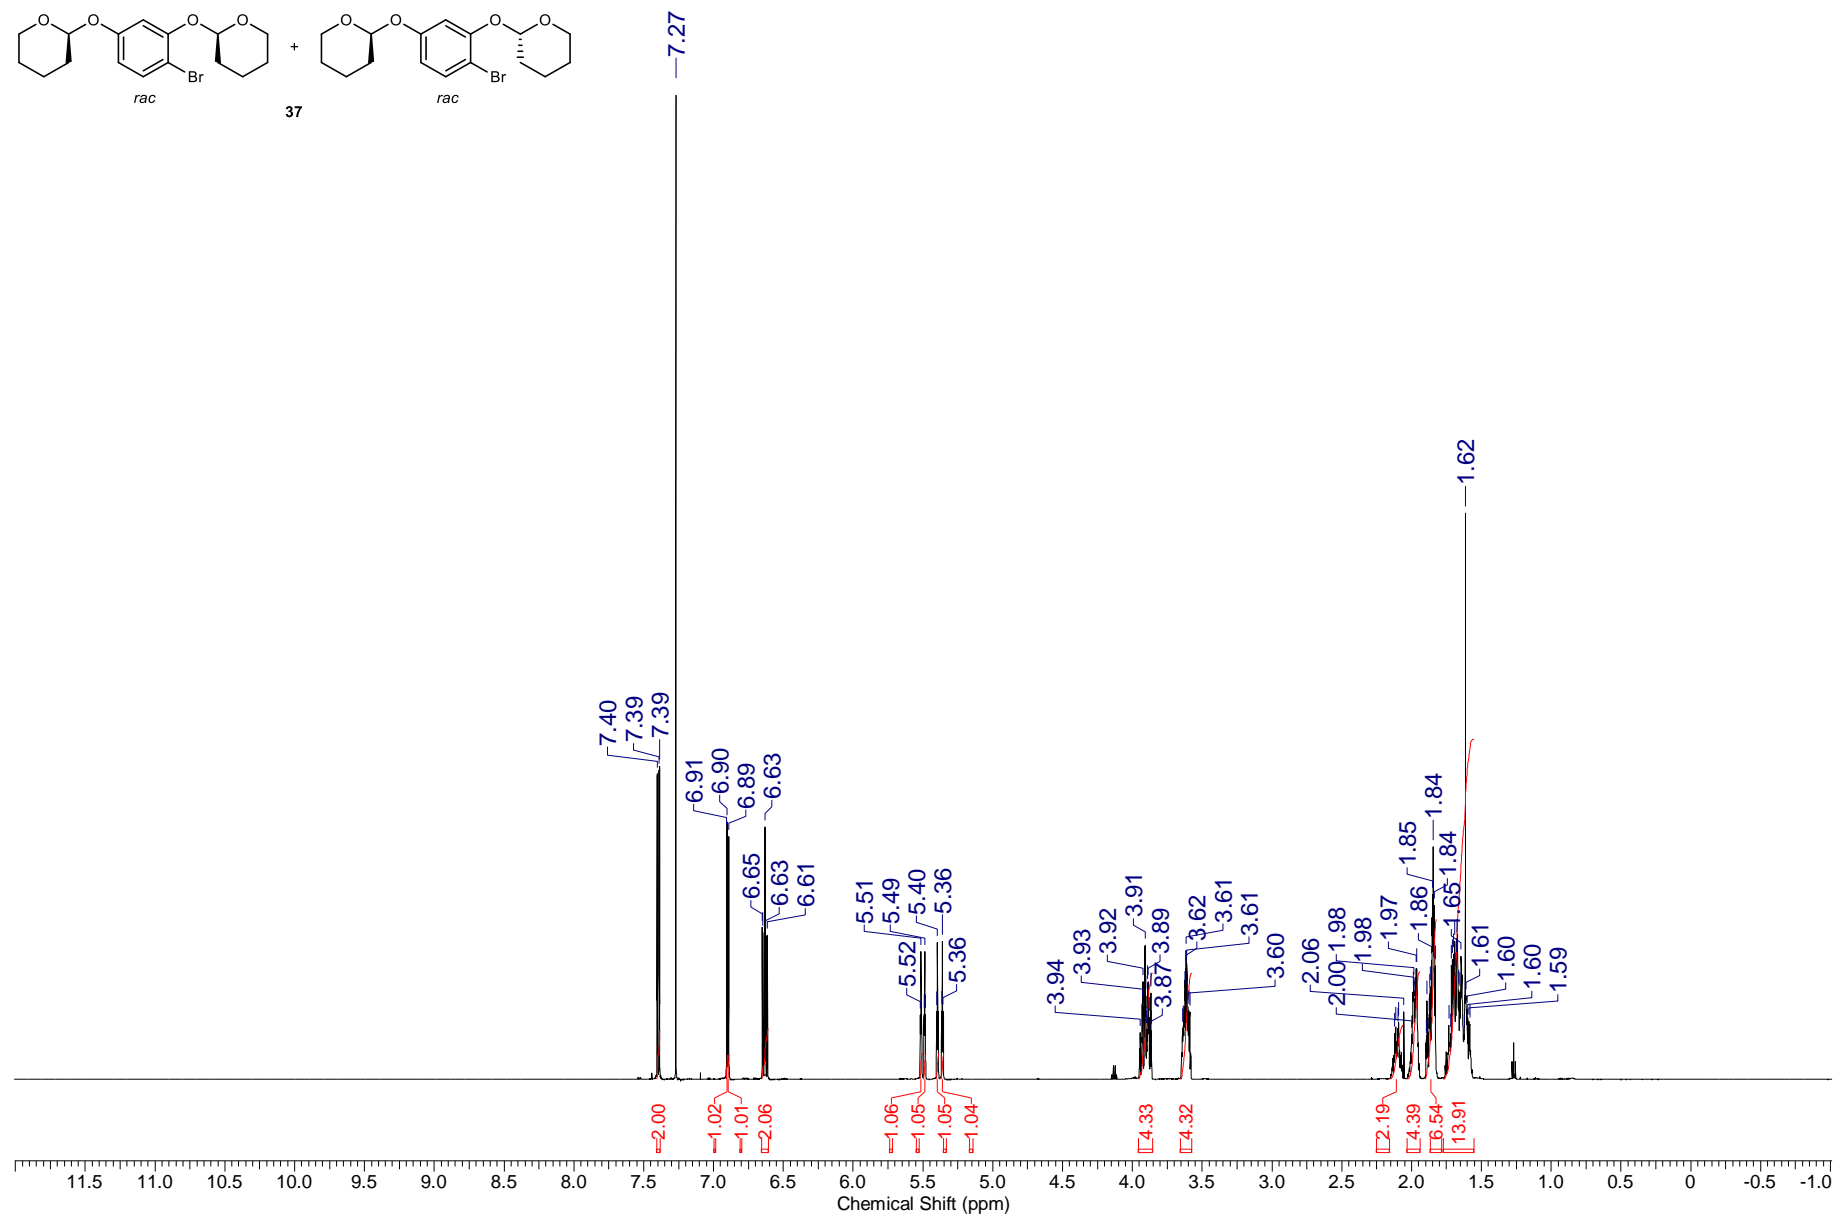

Supplementary Figure 53. <sup>1</sup>H NMR of 37

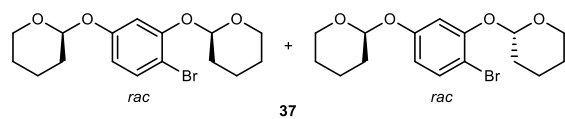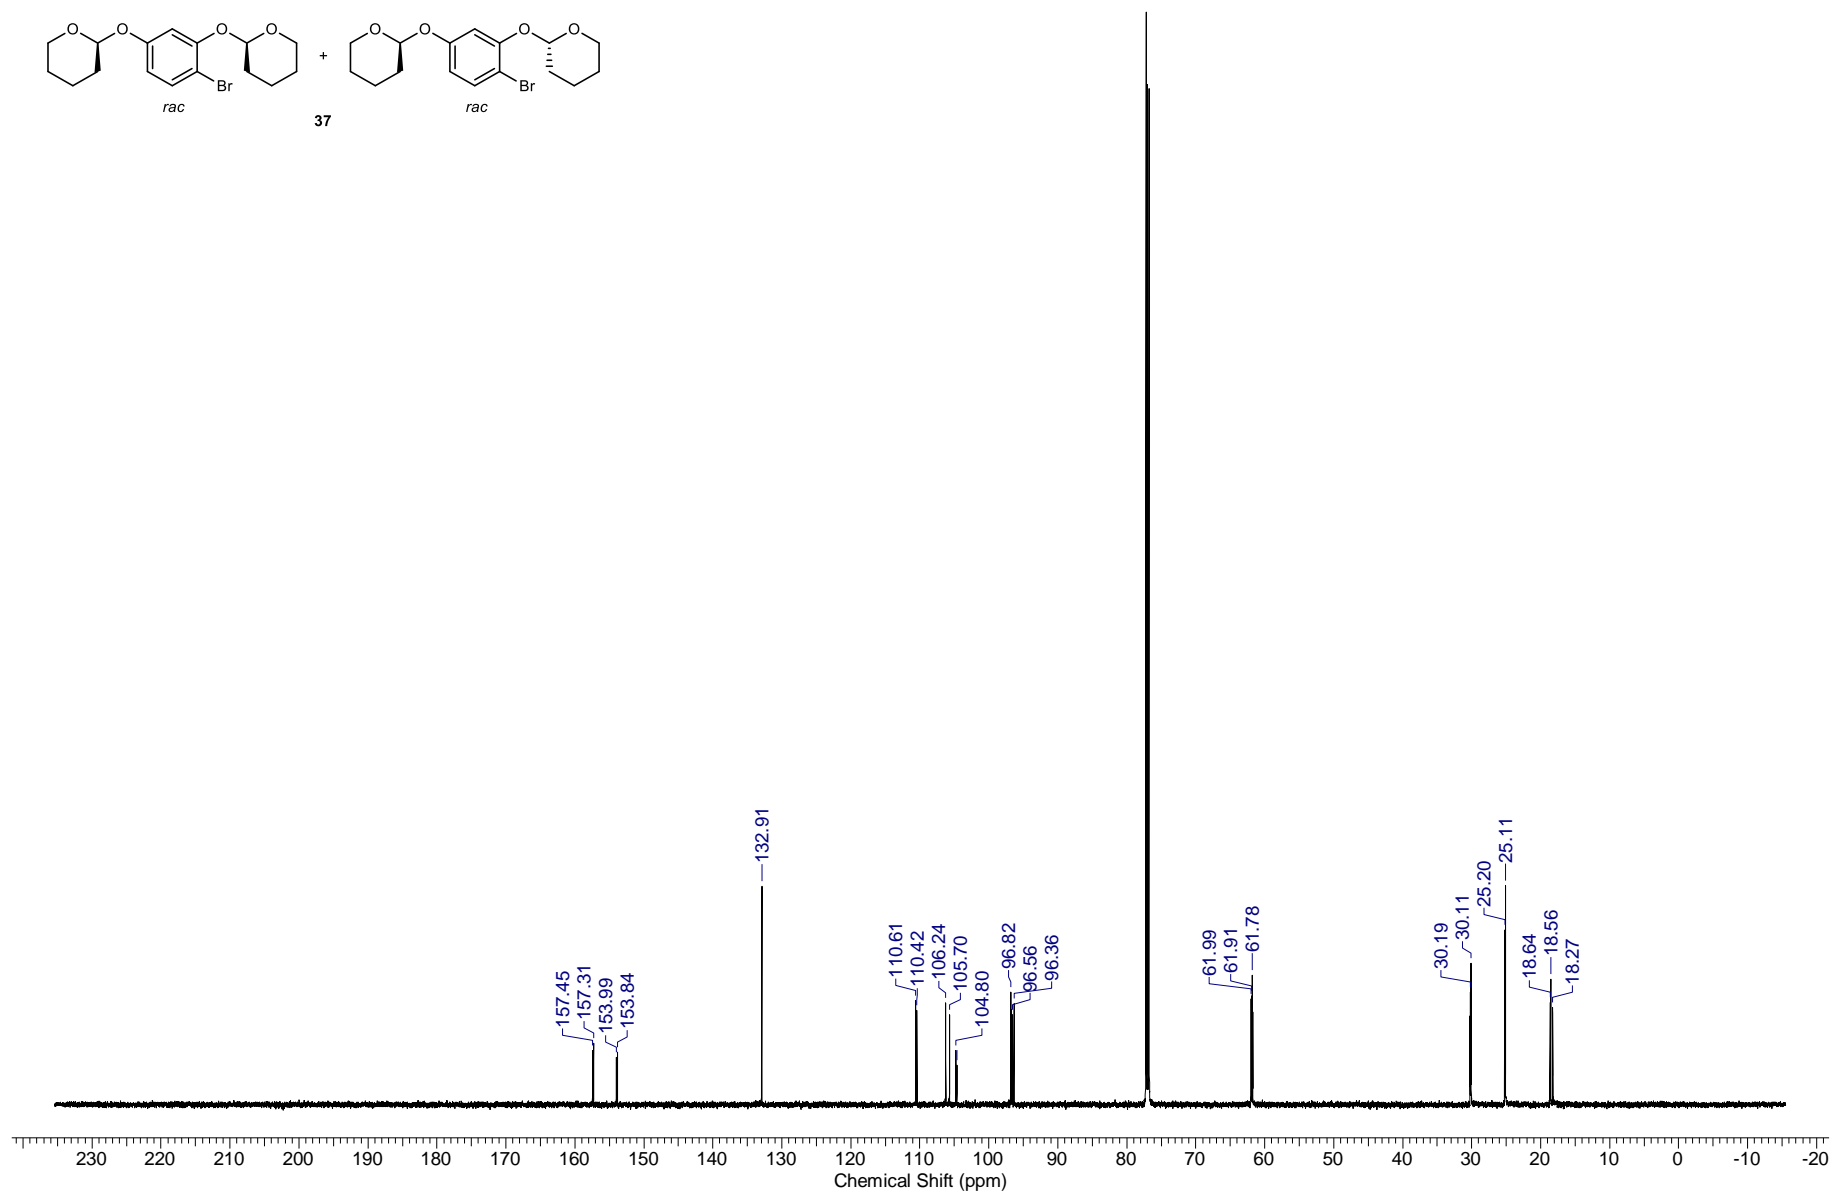

Supplementary Figure 54.  $^{13}\text{C}$  NMR of 37



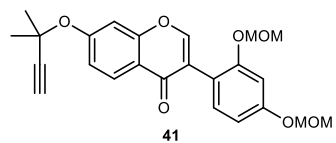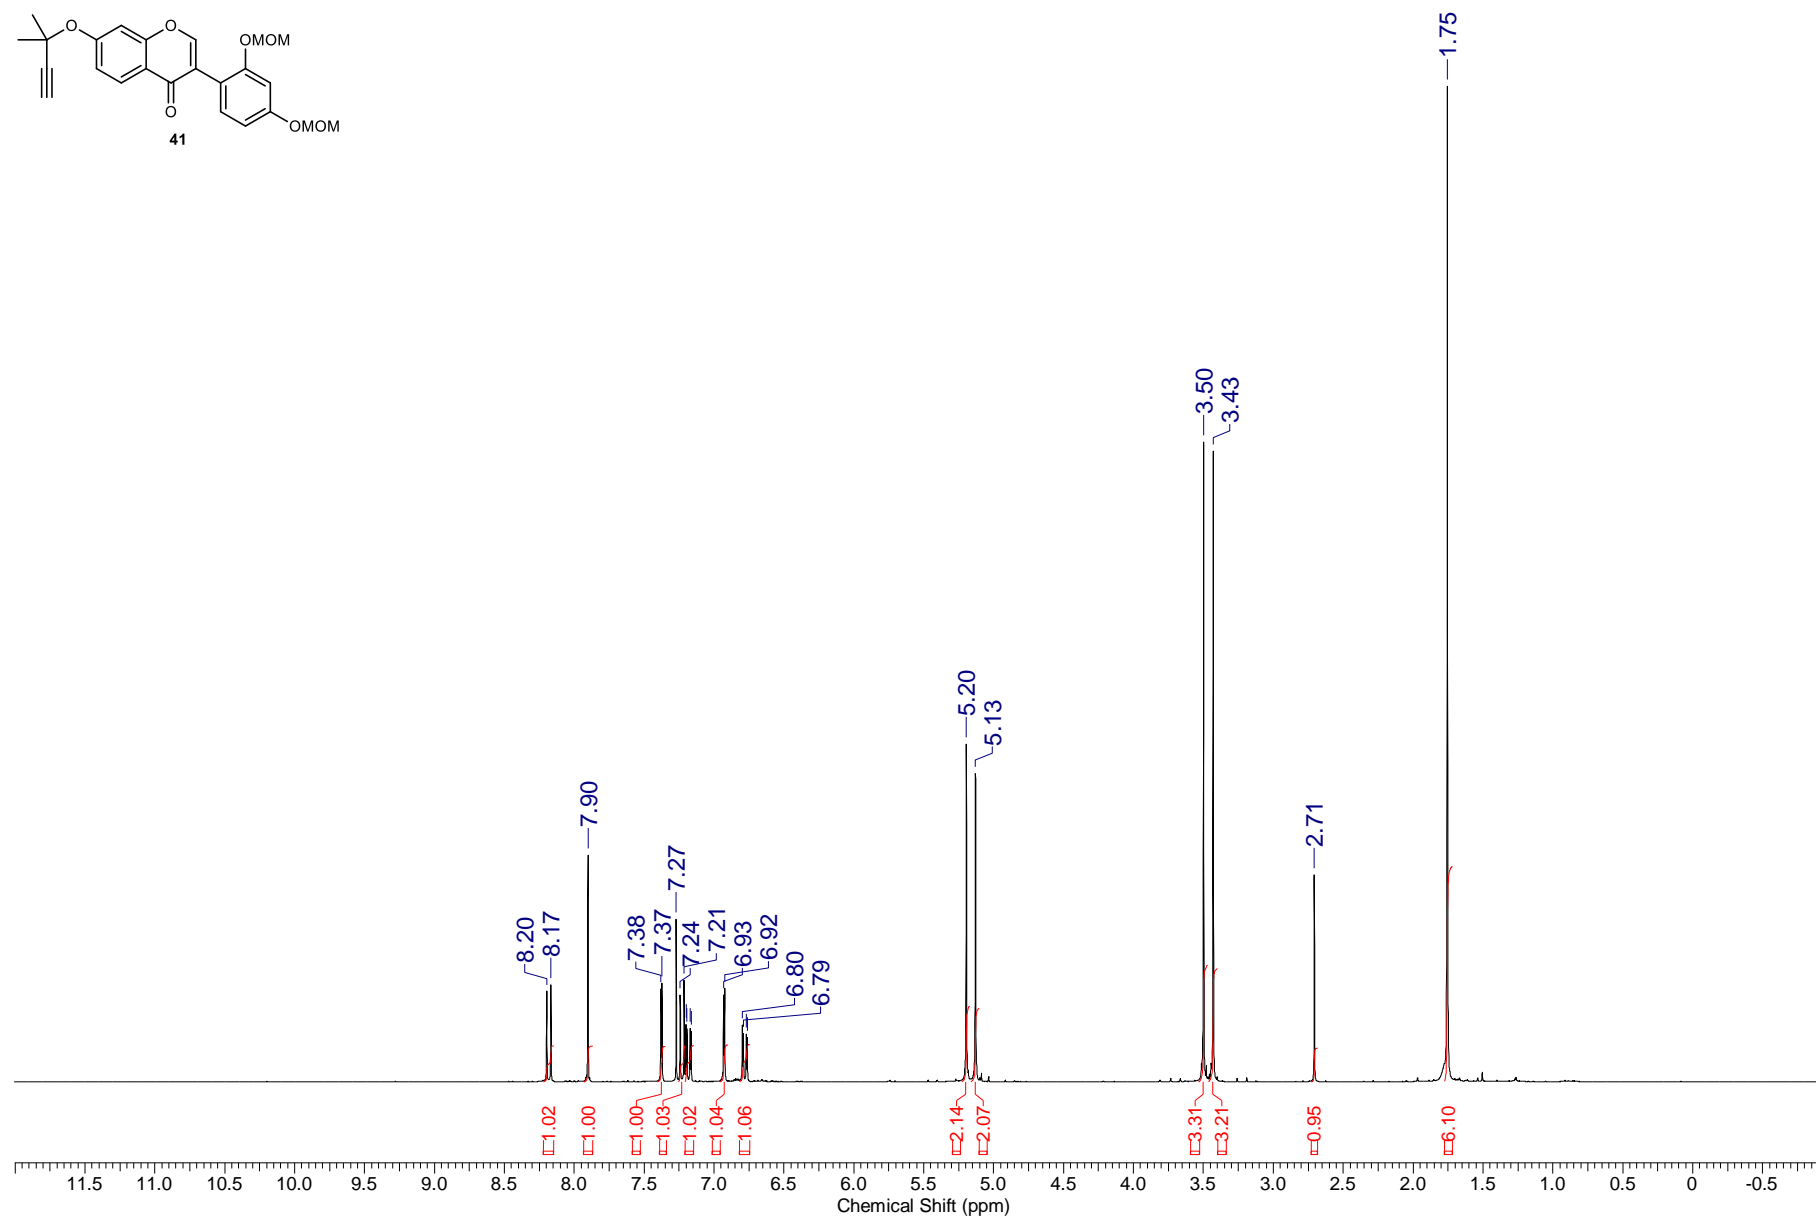

Supplementary Figure 55.  $^1\text{H}$  NMR of 41

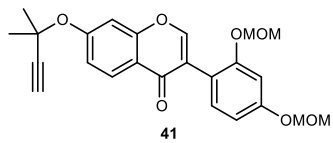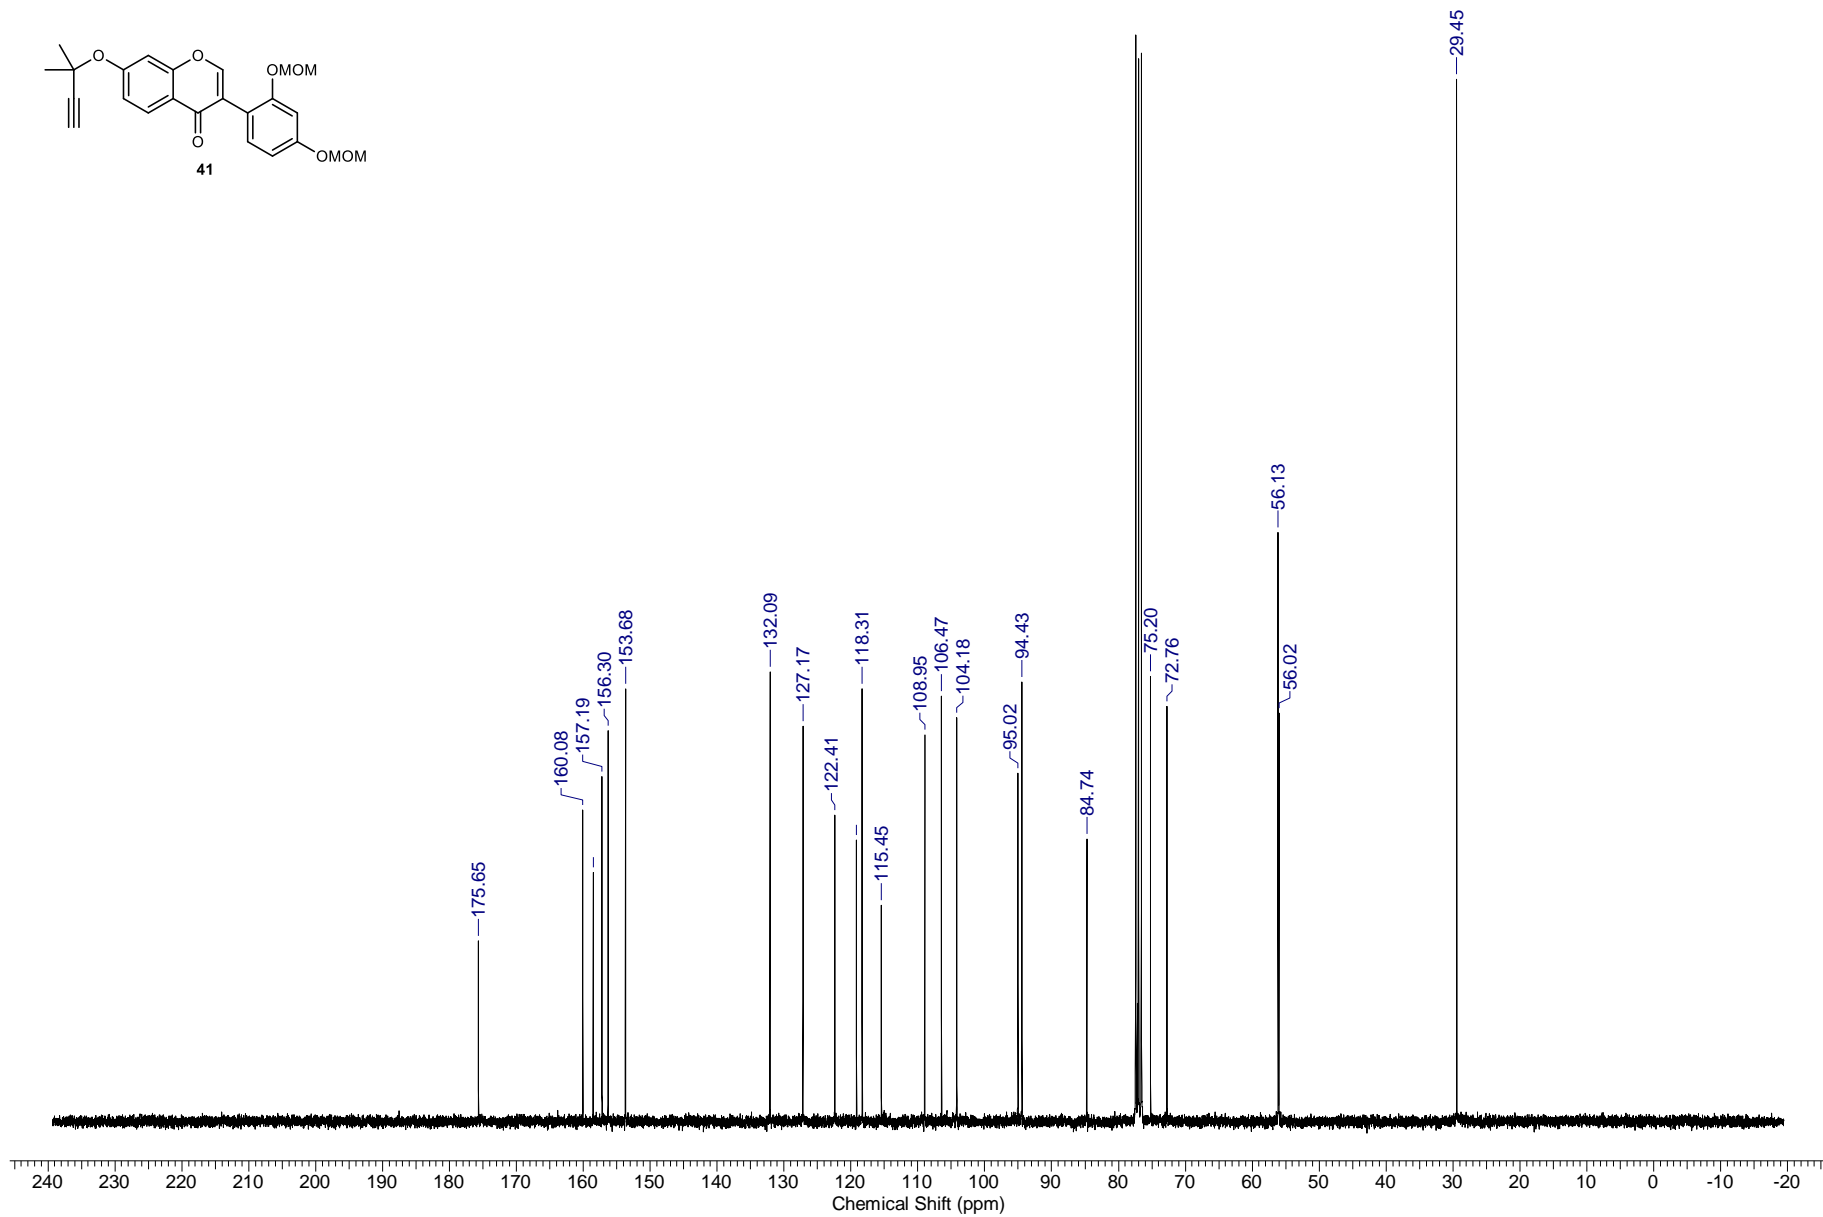

Supplementary Figure 56.  $^{13}\text{C}$  NMR of 41

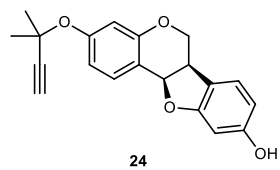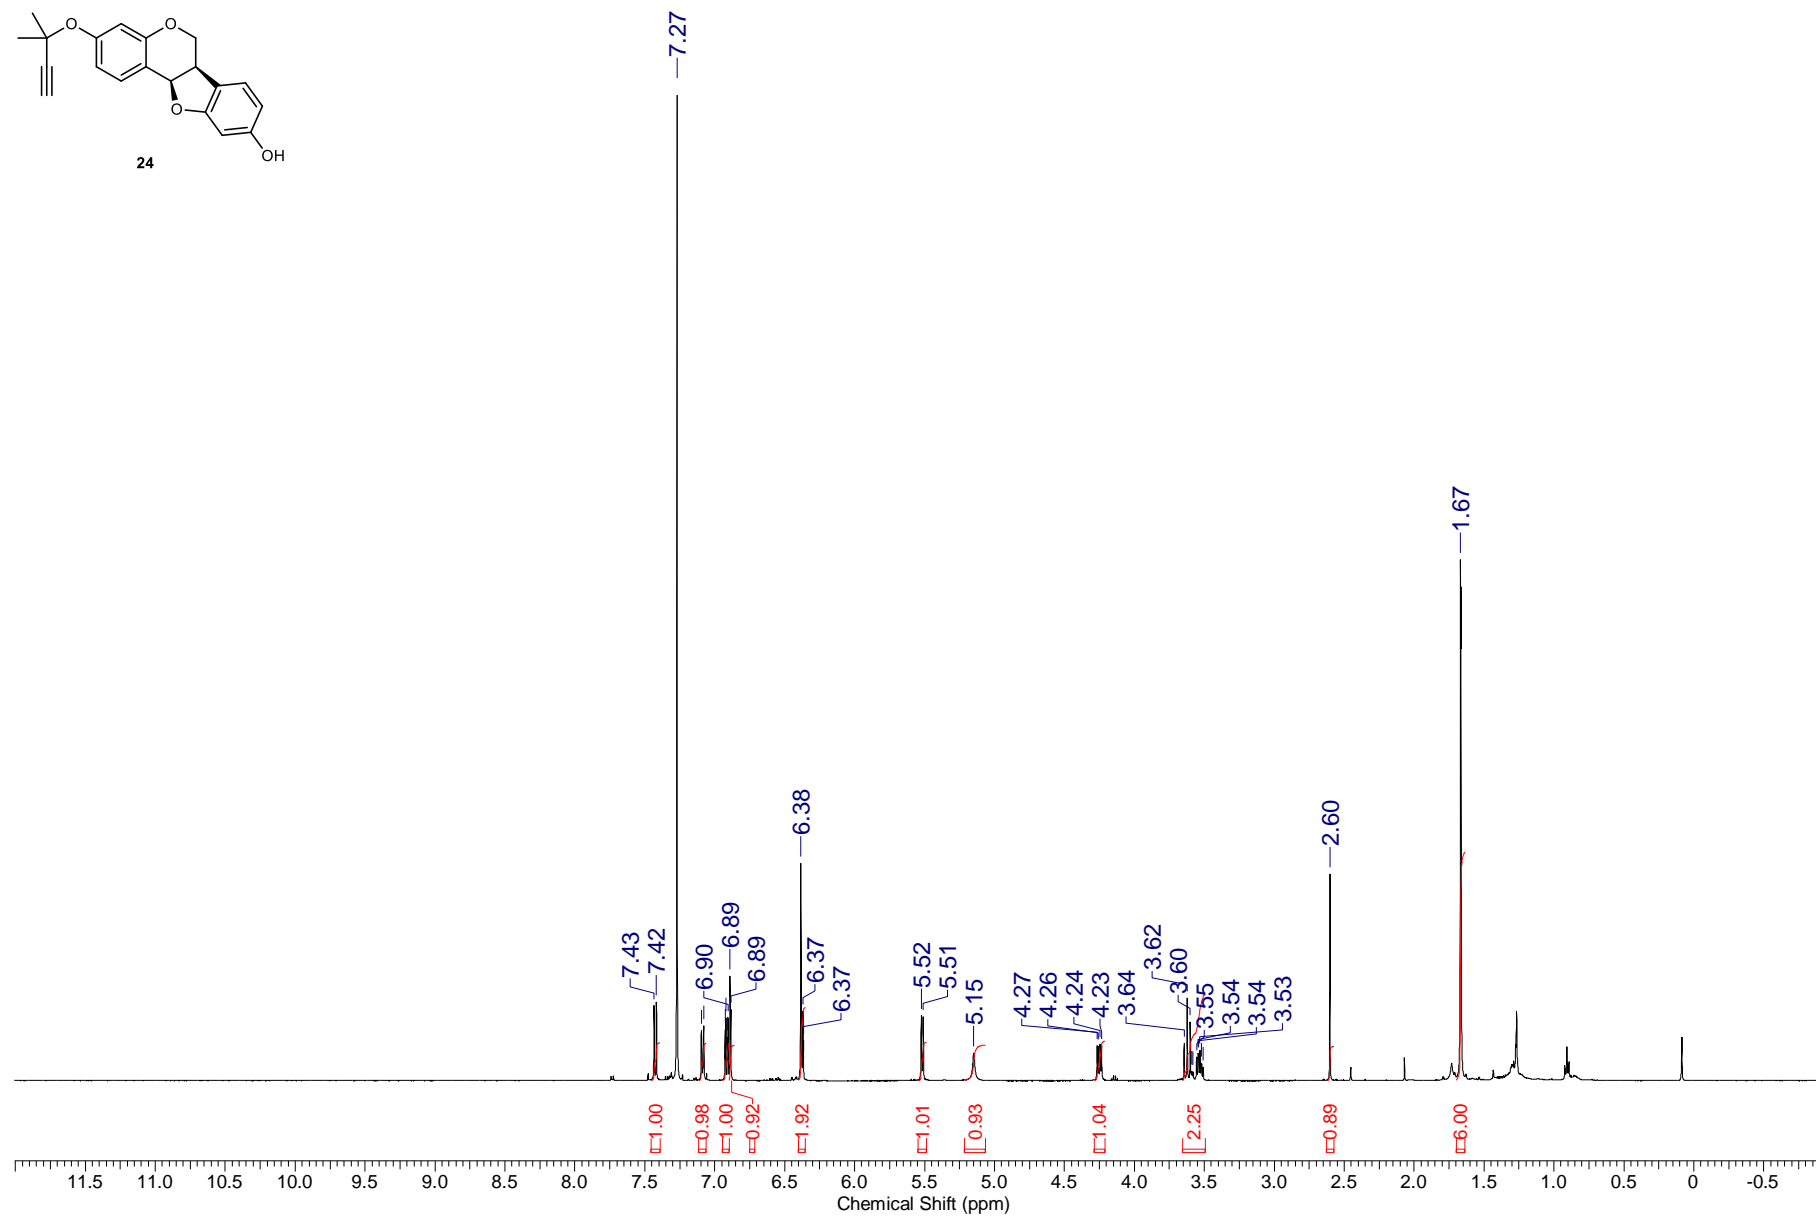

Supplementary Figure 57. <sup>1</sup>H NMR of 24

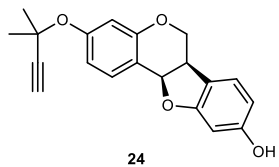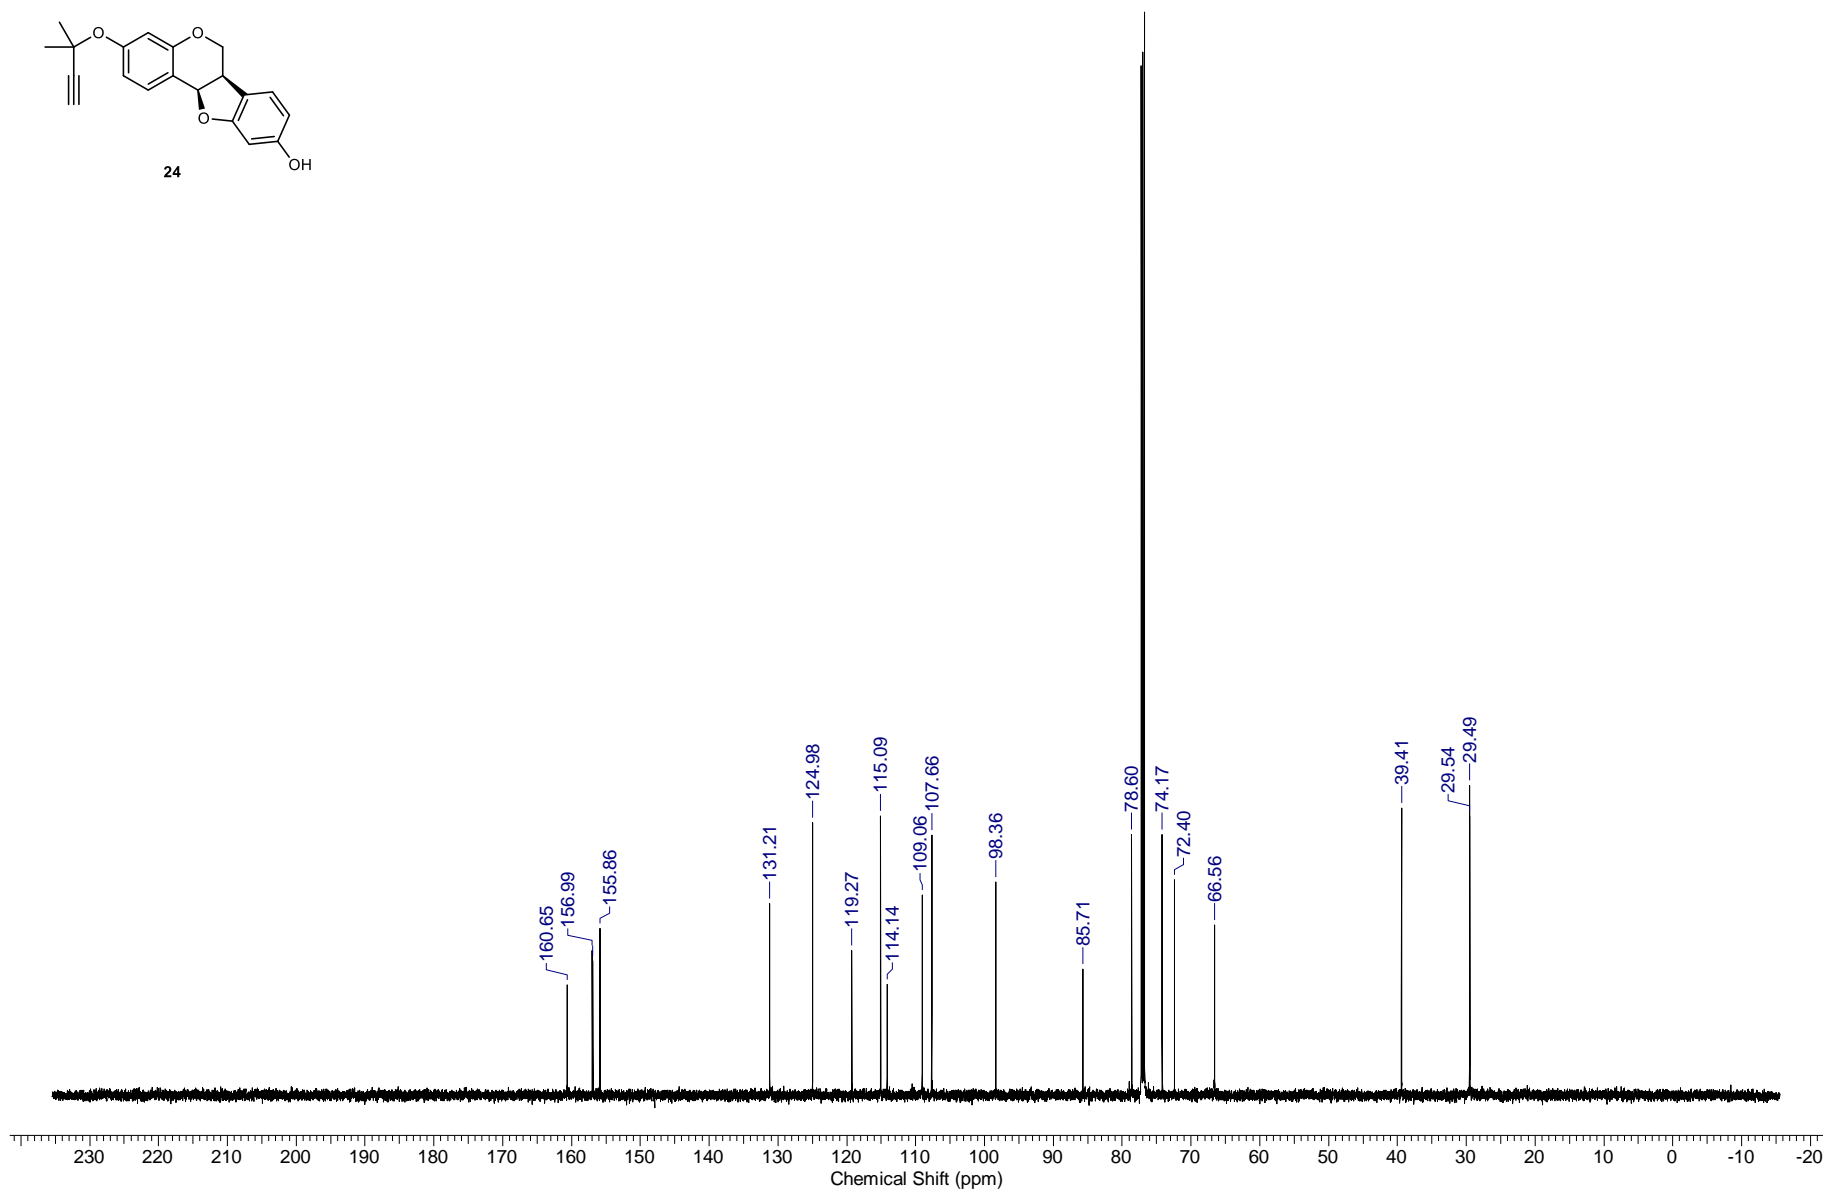

Supplementary Figure 58. <sup>13</sup>C NMR of 24

Chiral HPLC trace of *rac*-**24** (bottom) and (*R,R*)-**24** (top, >99% *ee*); Method: Chiralpak<sup>®</sup> AD, hexane:isopropanol 80:20 *v/v*, 0.8 mL/min

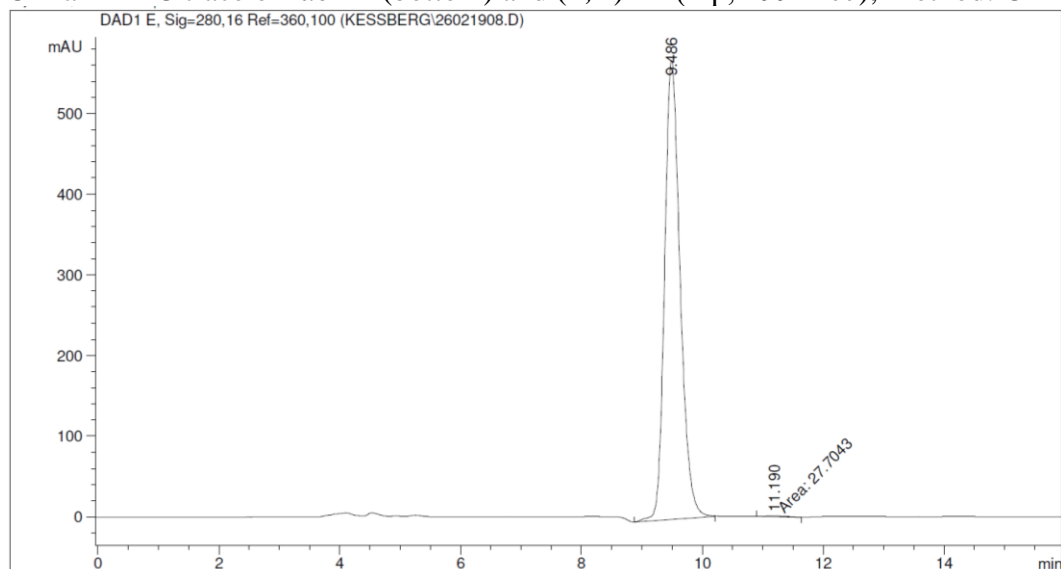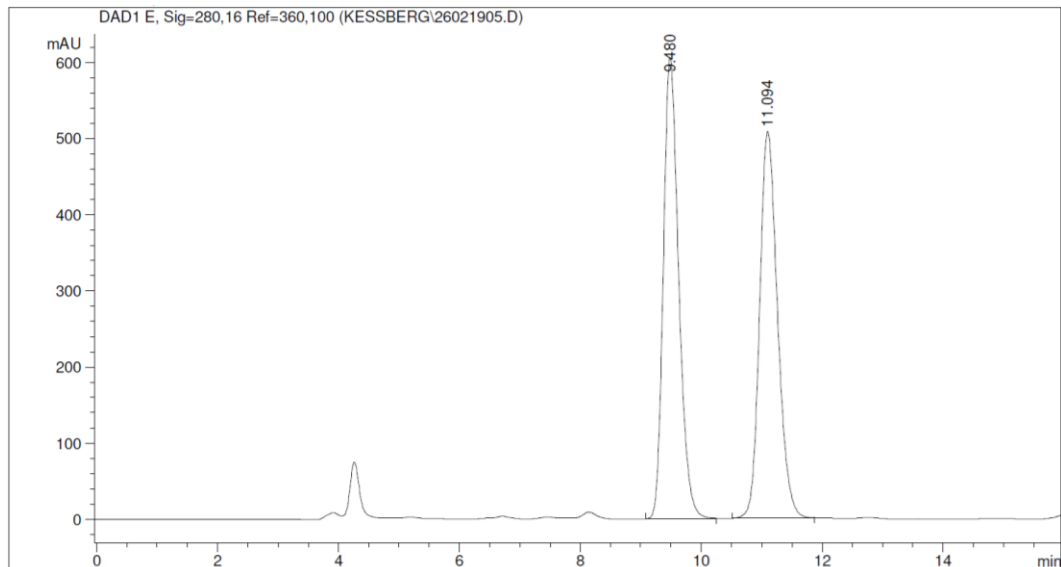

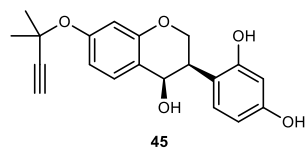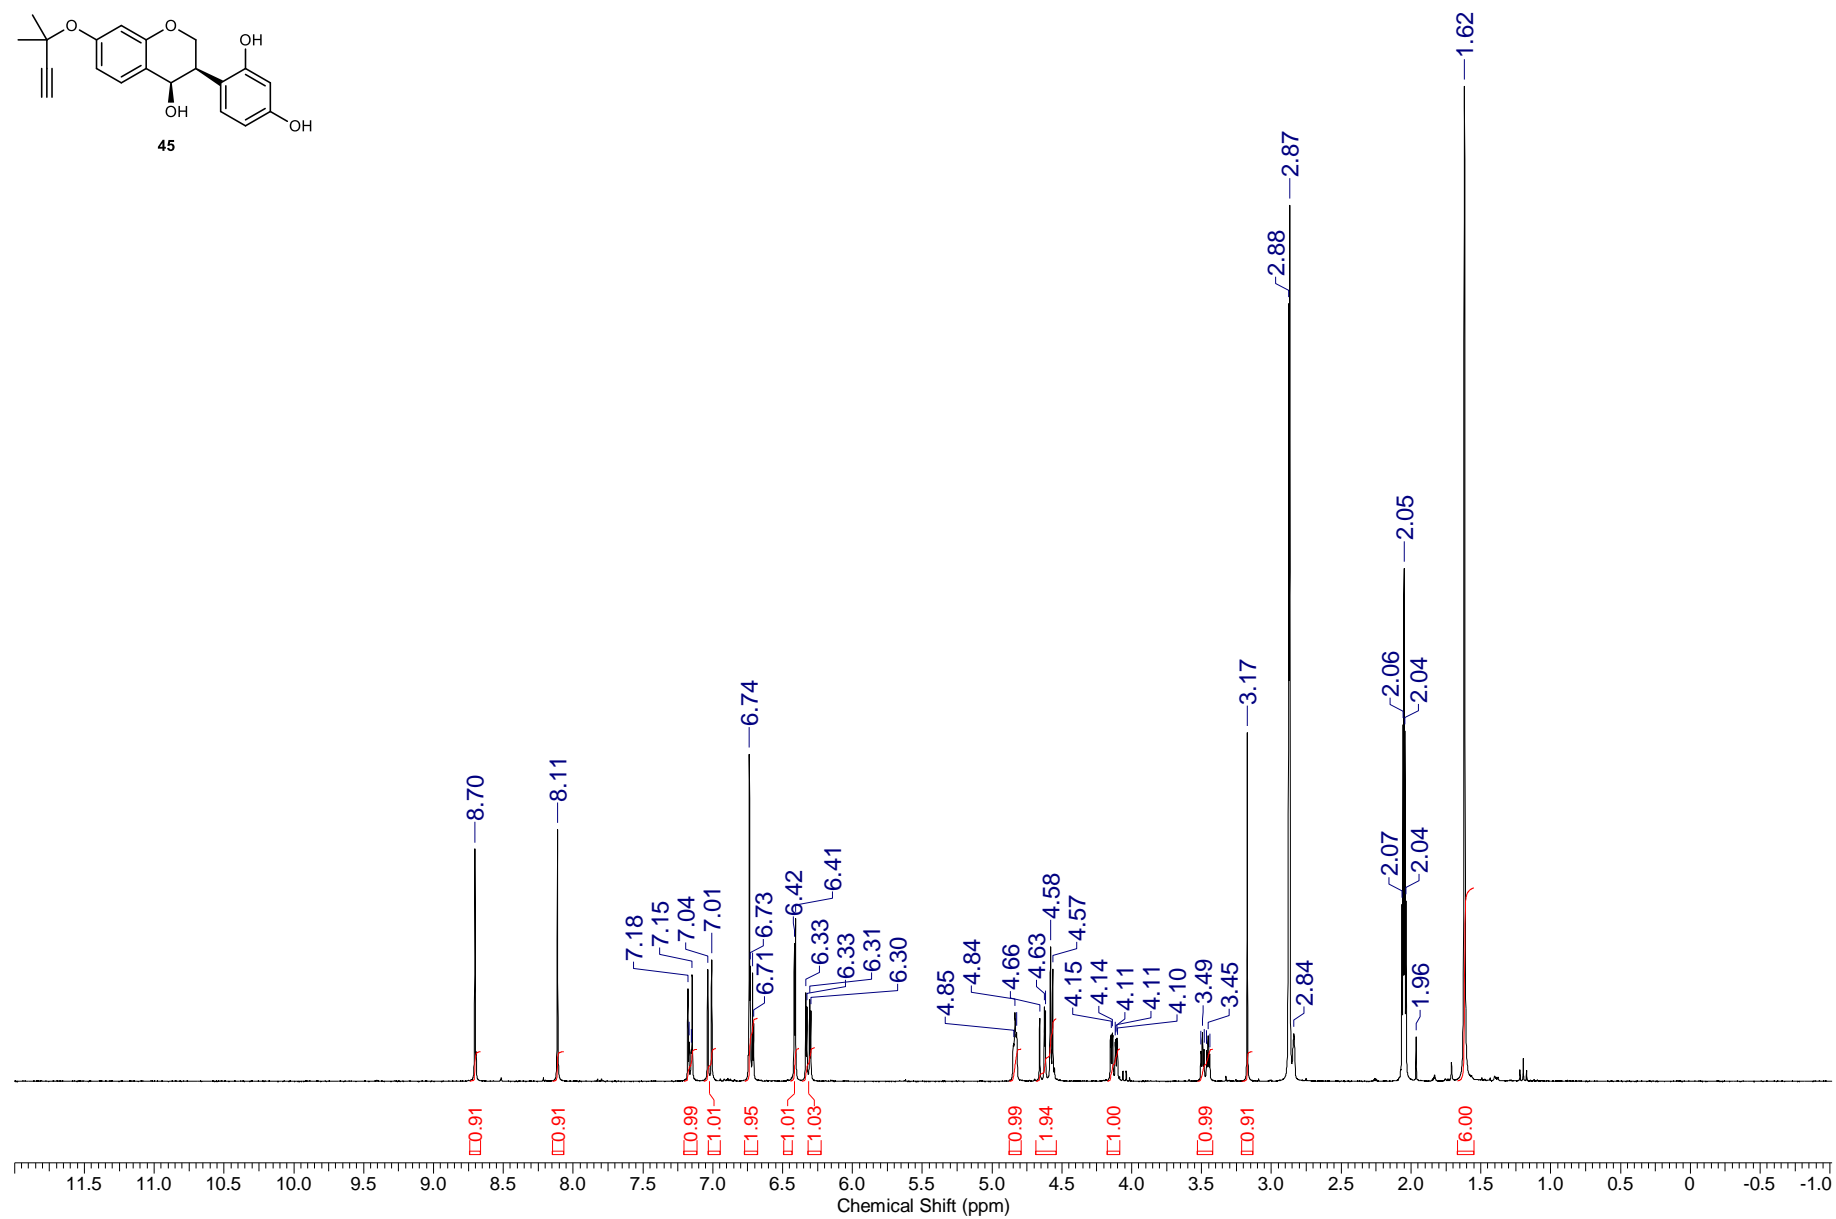

Supplementary Figure 60. <sup>1</sup>H NMR of 45

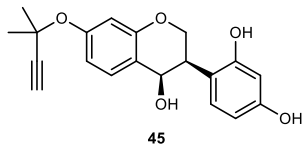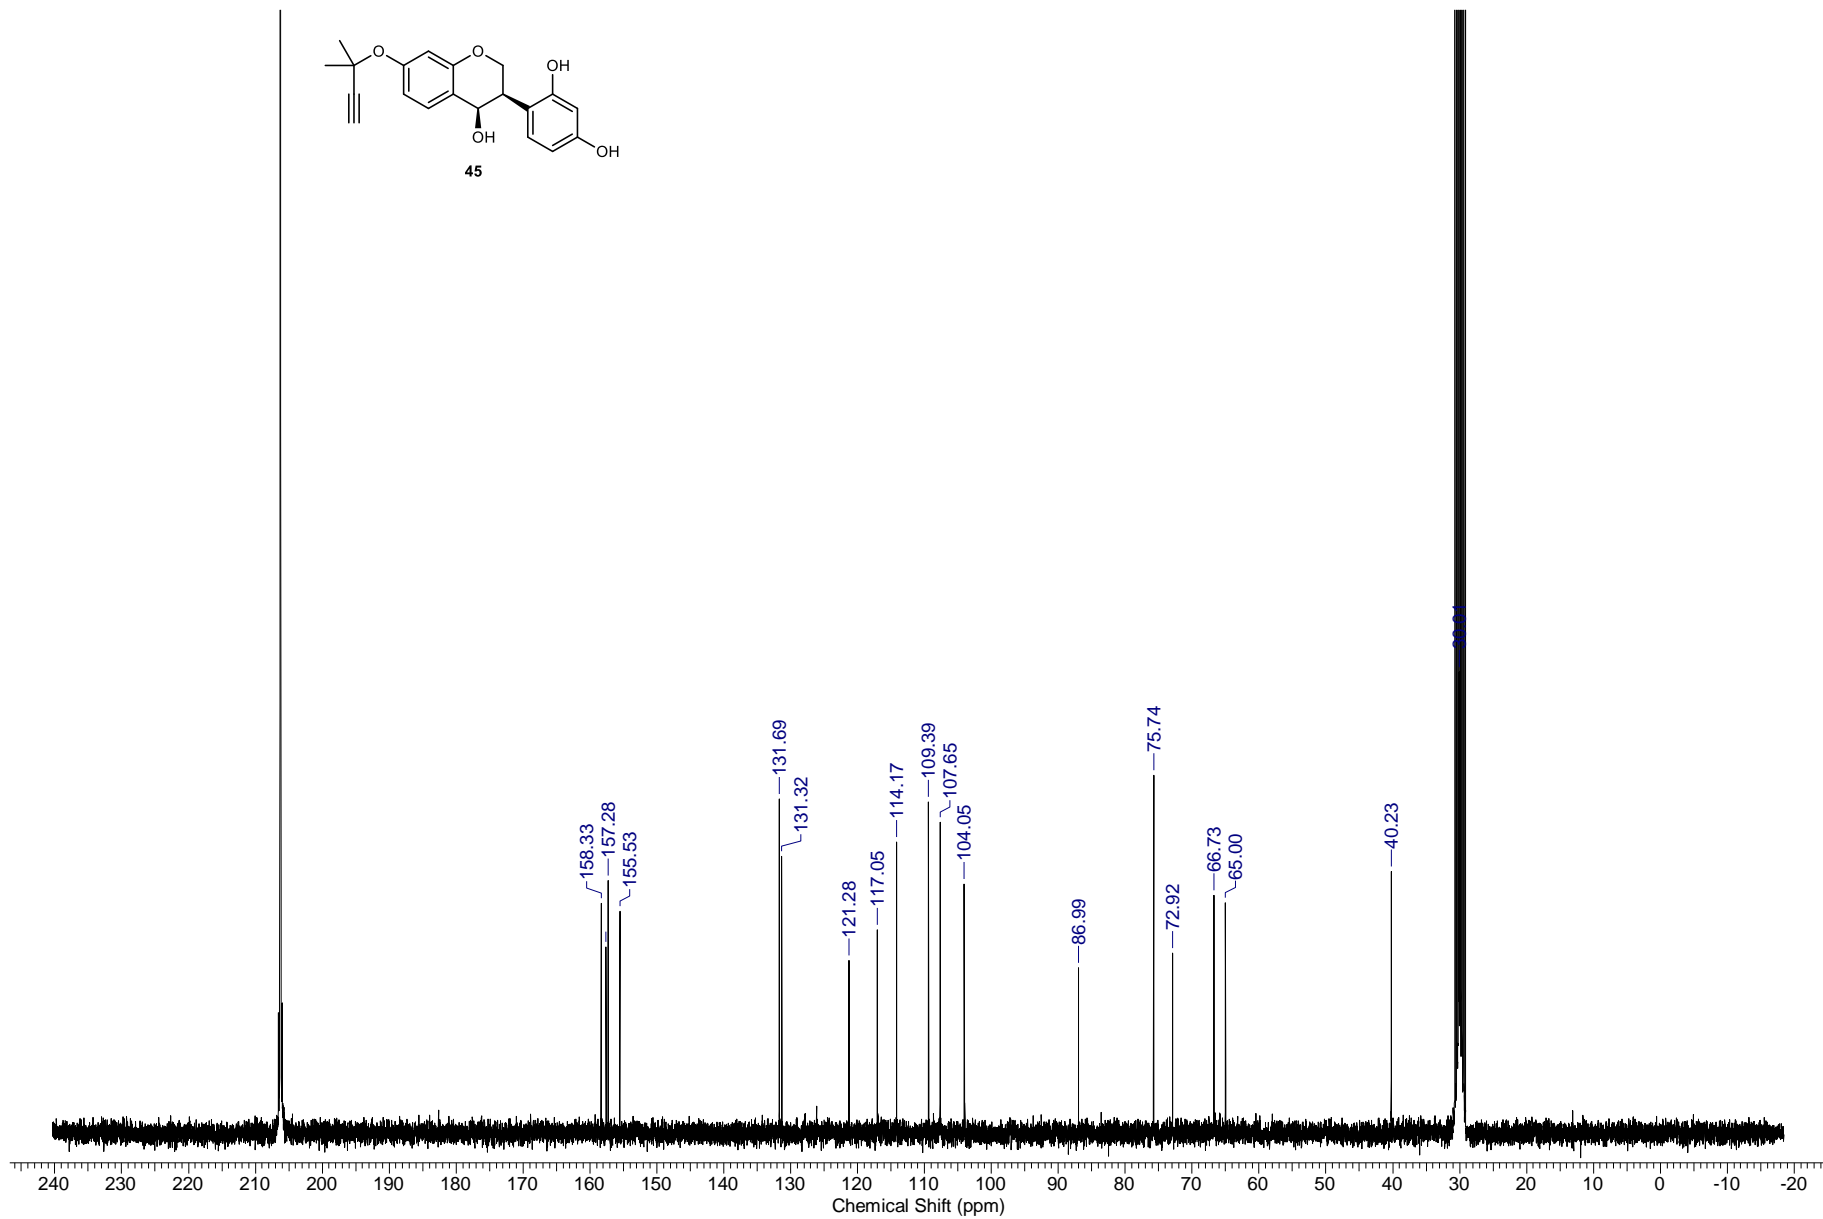

Supplementary Figure 61. <sup>13</sup>C NMR of 45





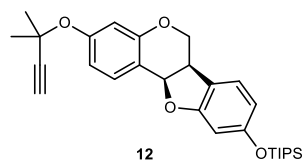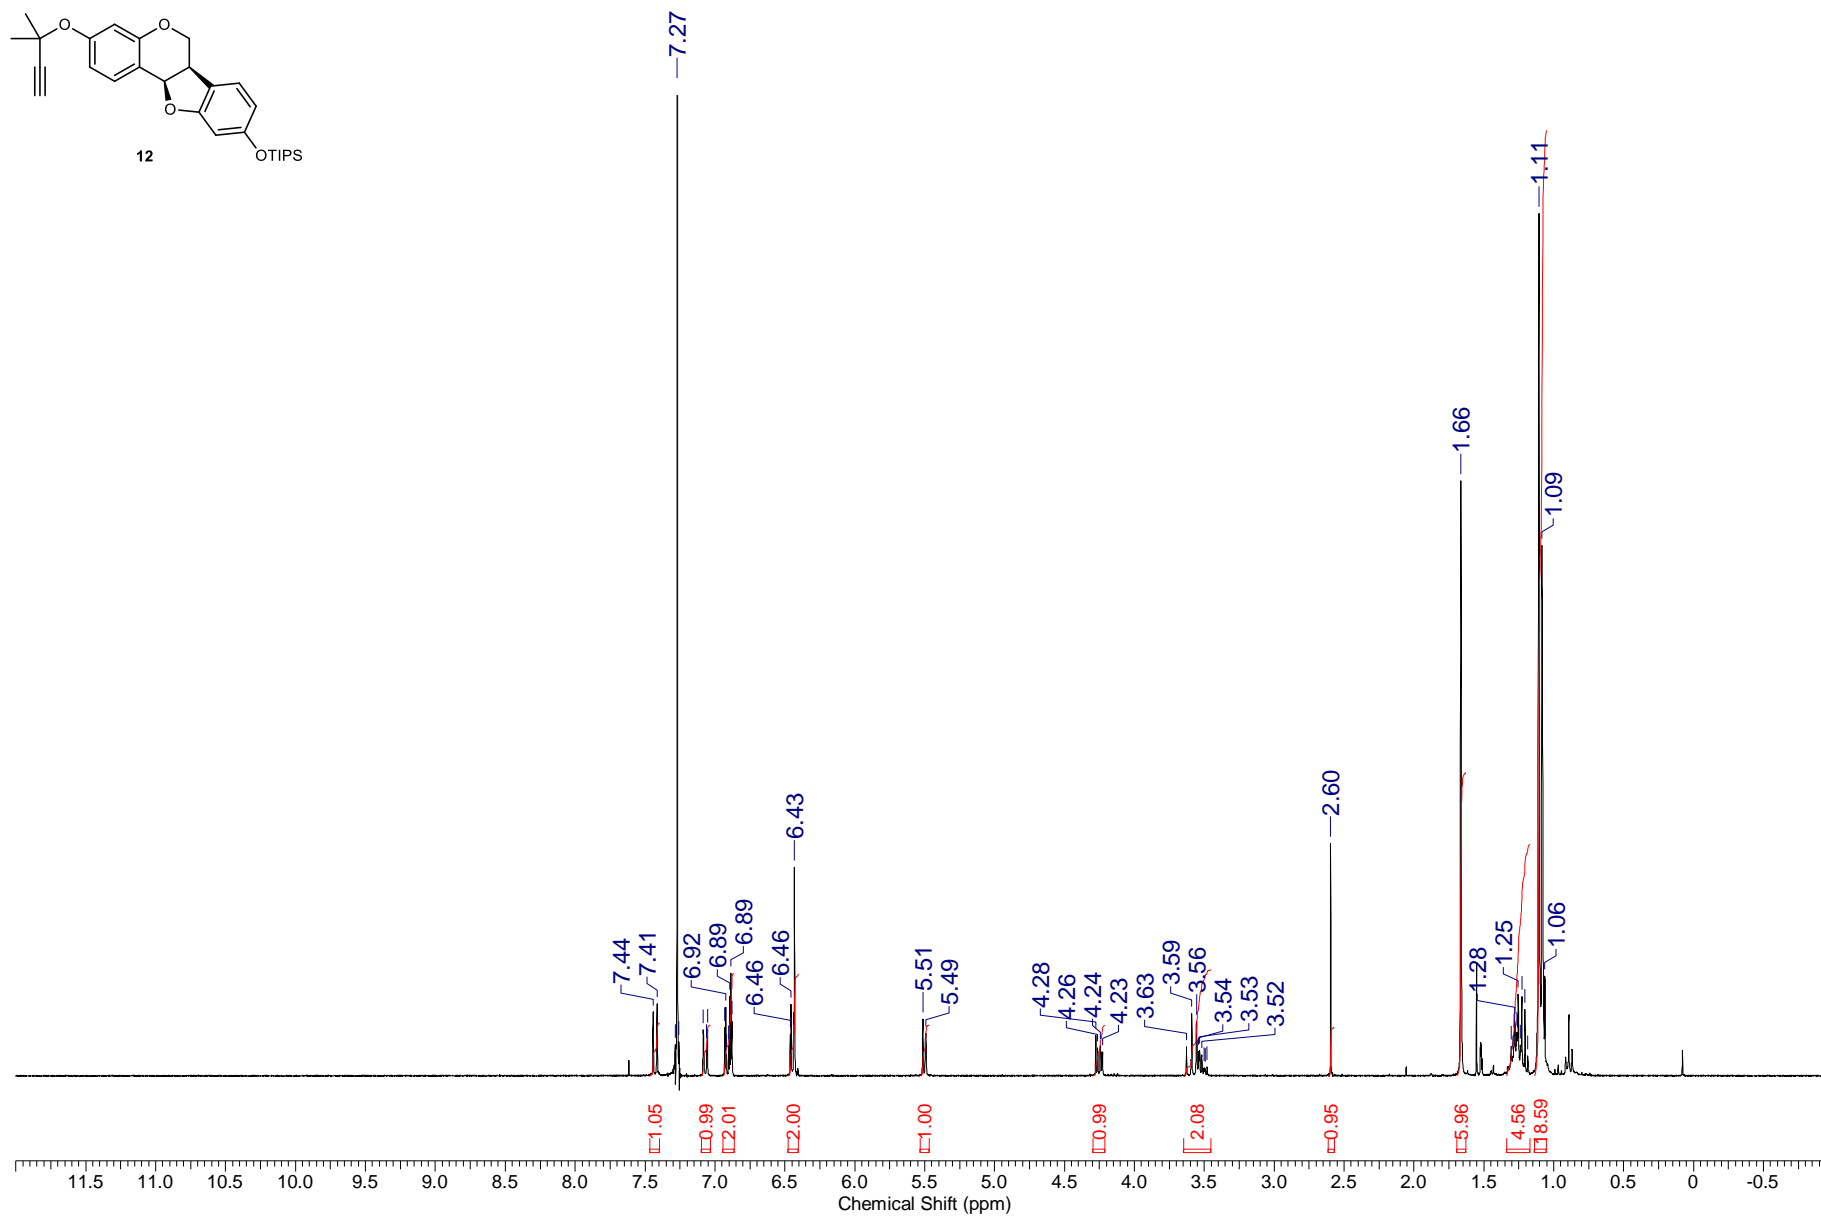

Supplementary Figure 63.  $^1\text{H}$  NMR of 12

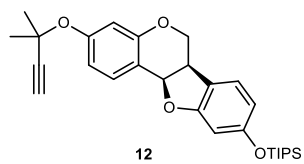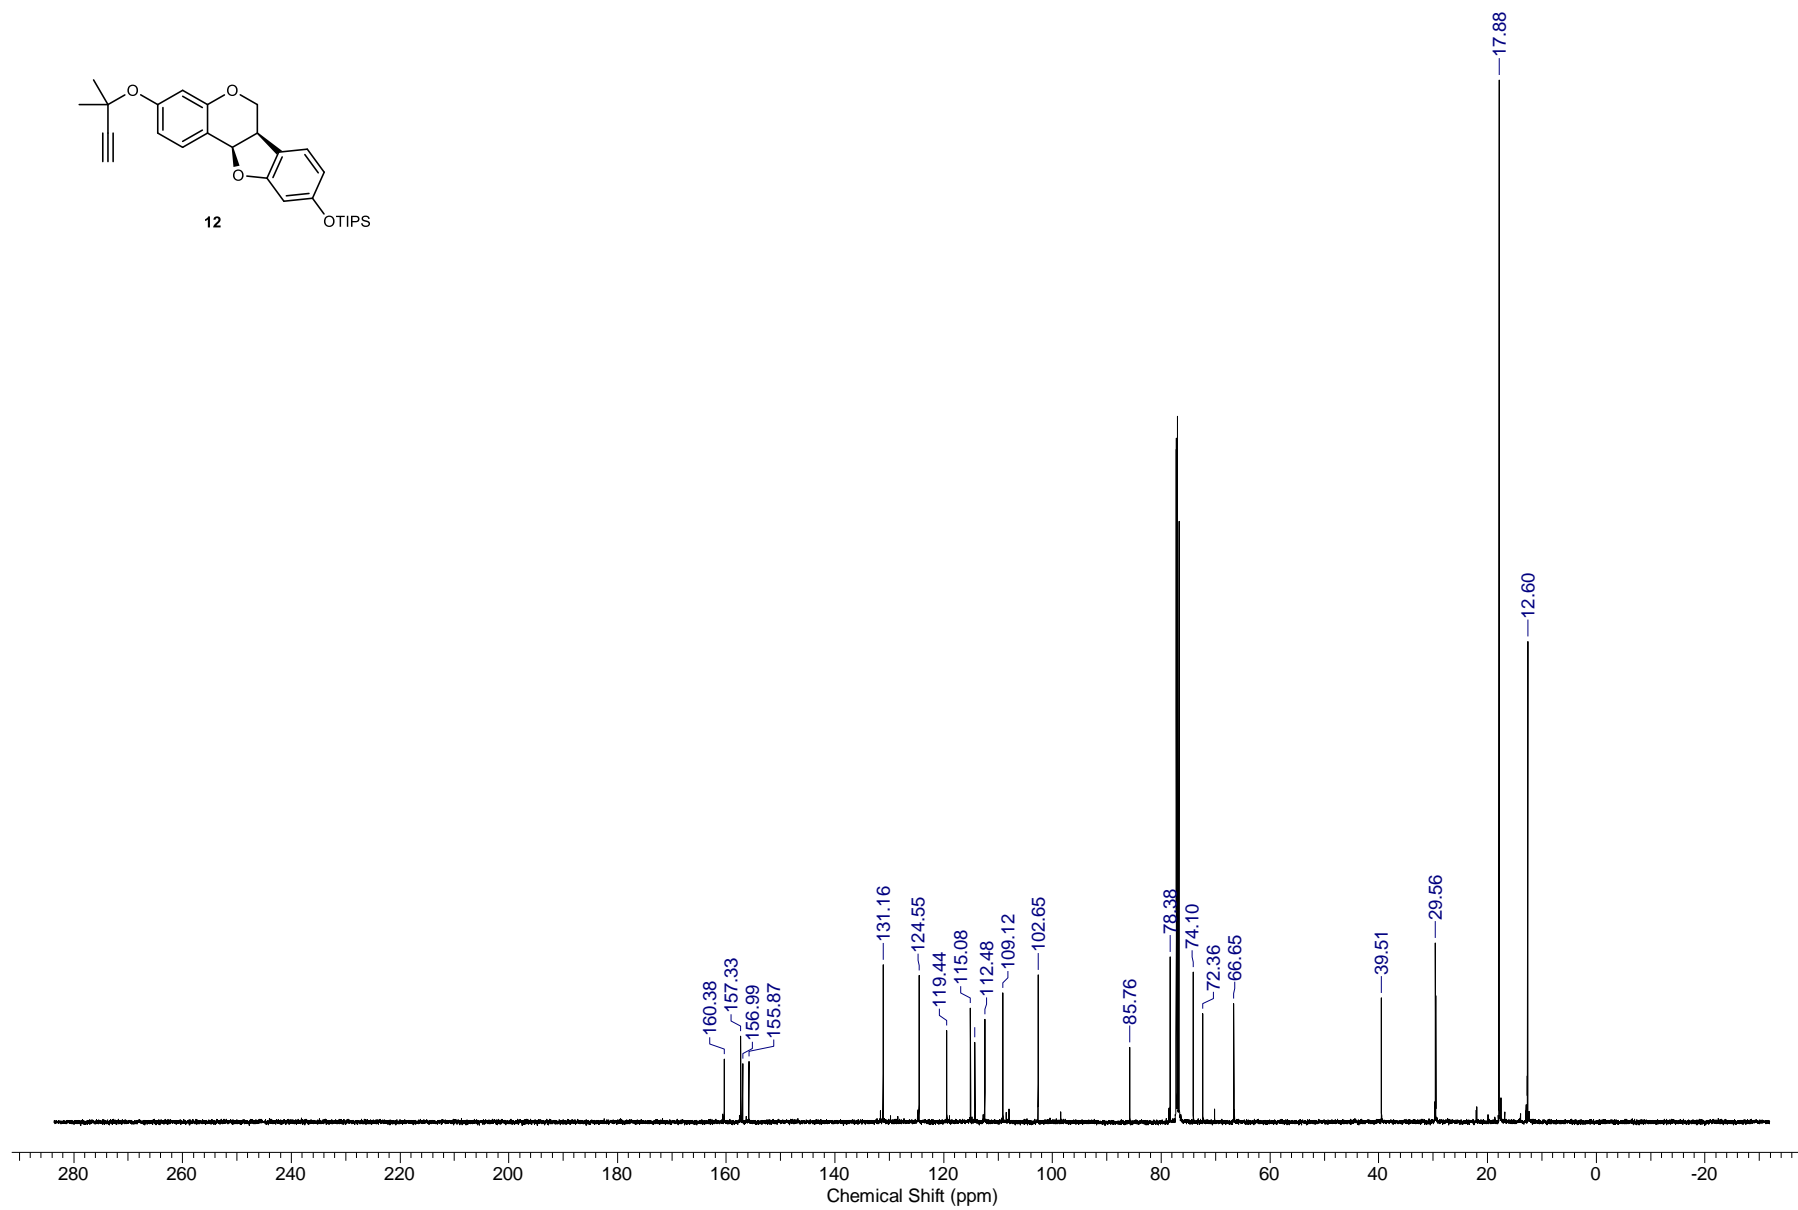

Supplementary Figure 64.  $^{13}\text{C}$  NMR of 12

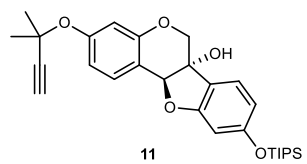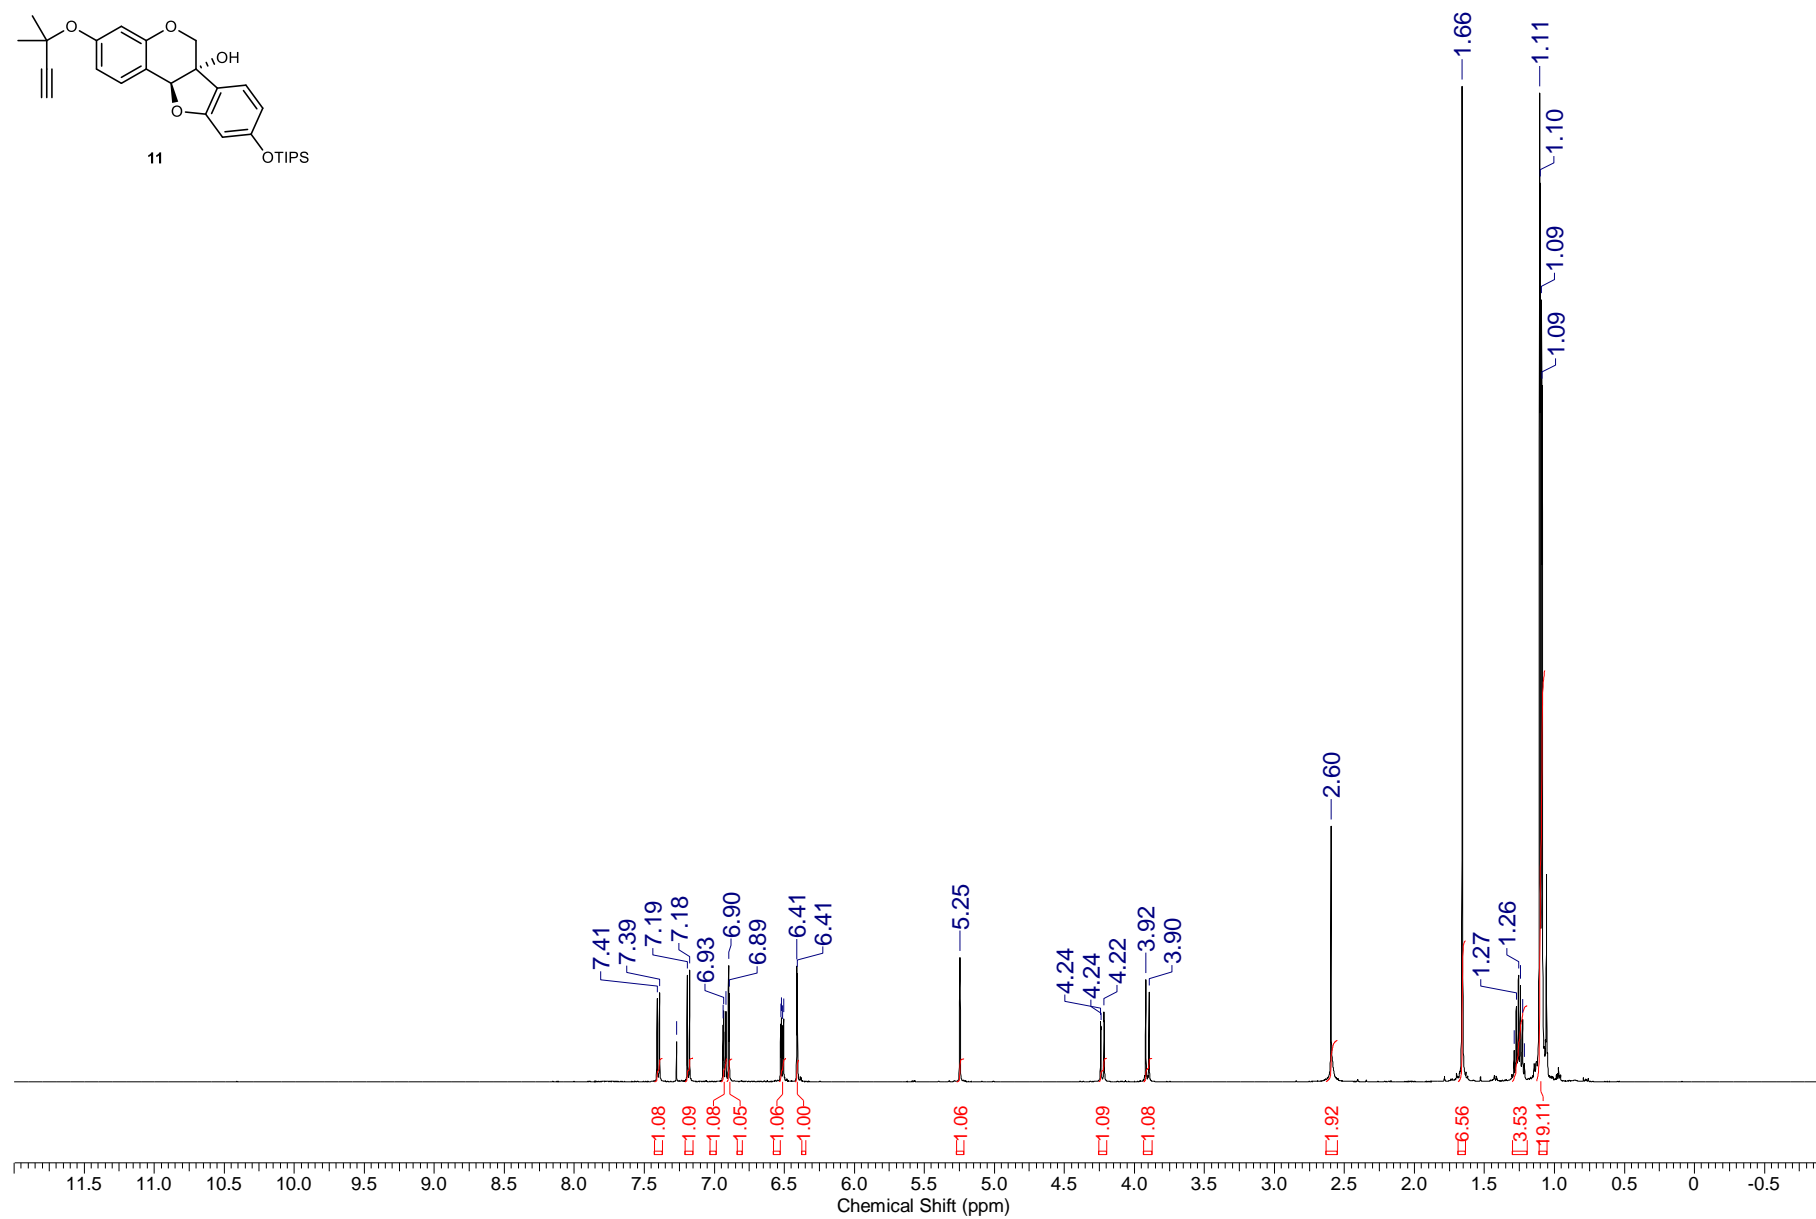

Supplementary Figure 65. <sup>1</sup>H NMR of **11**

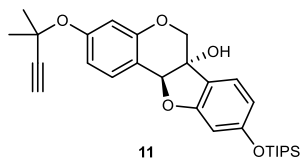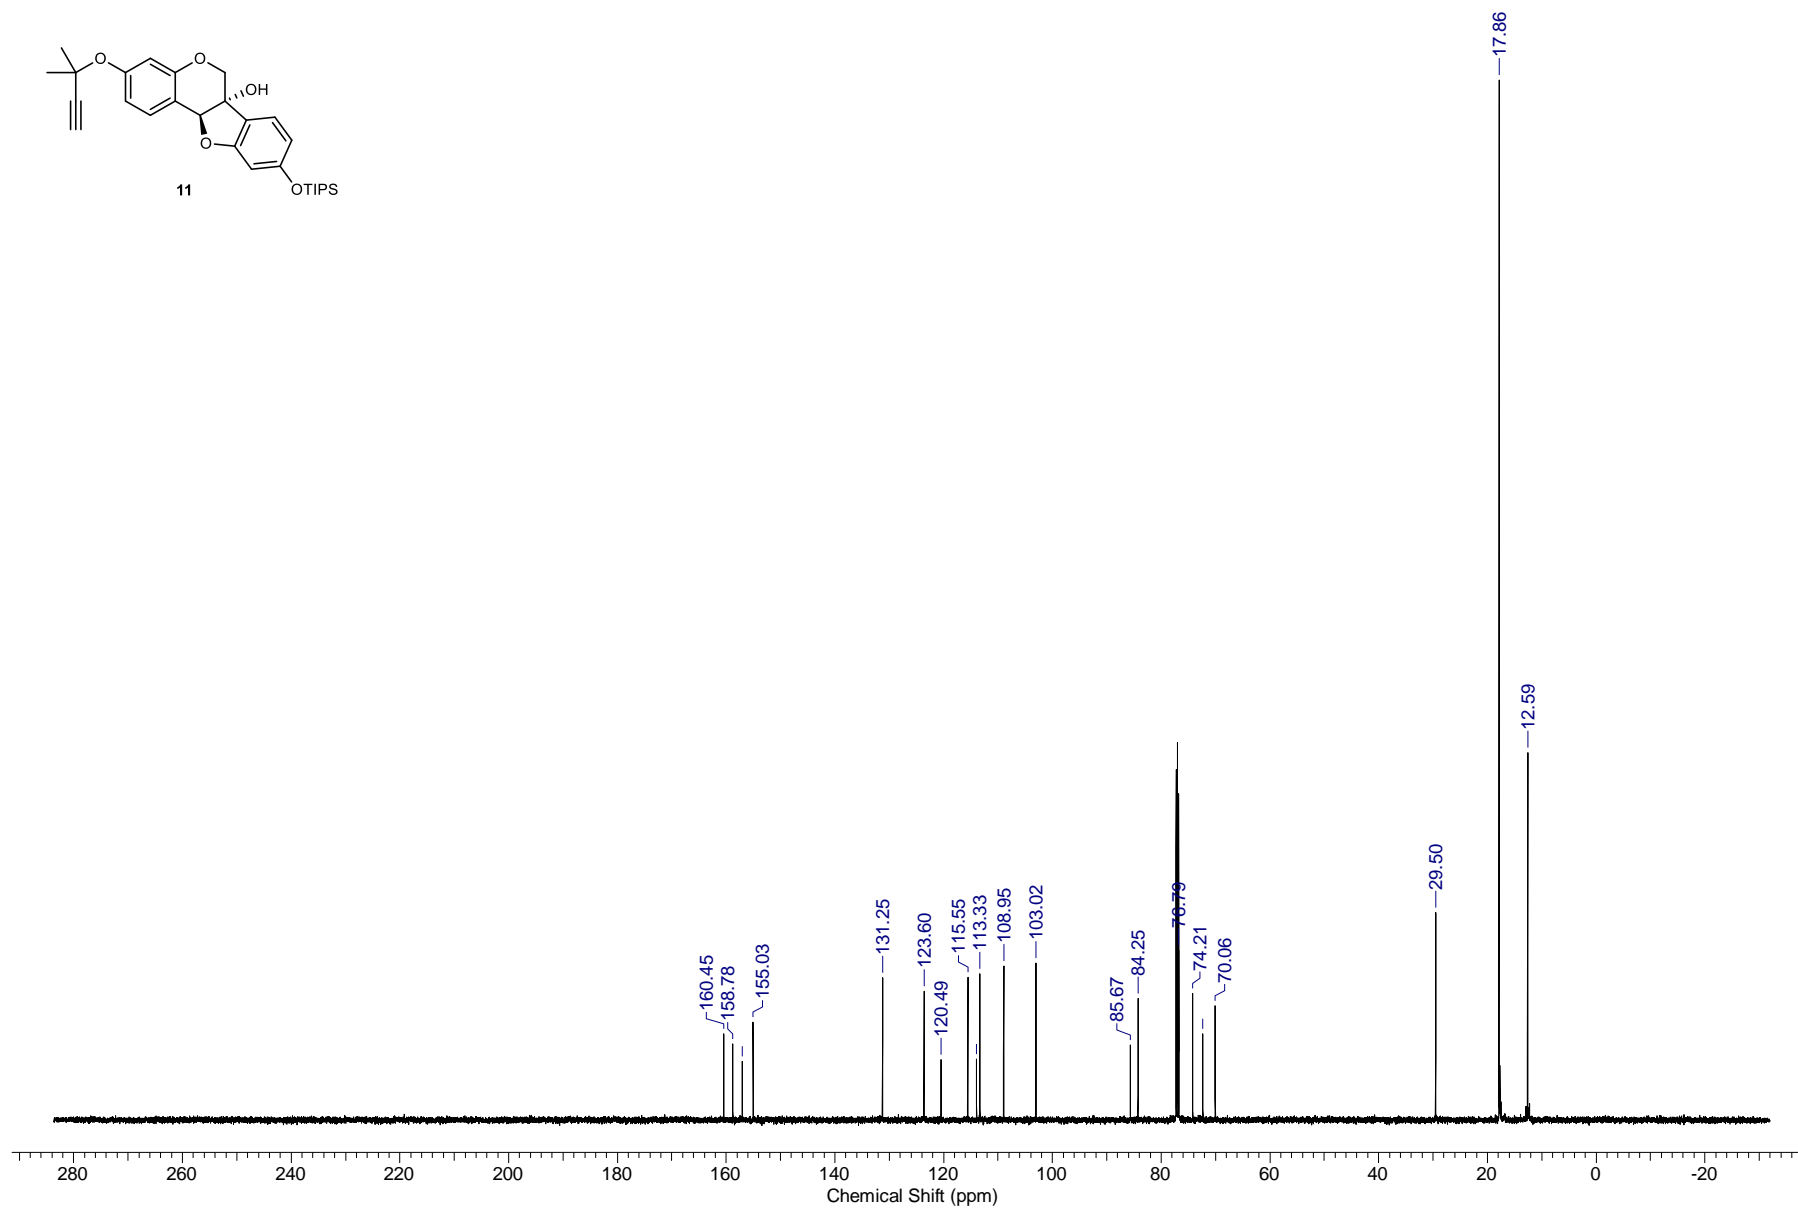

Supplementary Figure 66. <sup>13</sup>C NMR of 11

Chiral HPLC trace of *rac*-**11** (bottom) and (*S,S*)-**11** (top, >99% *ee*); Method: Lux<sup>®</sup> Cellulose-1, hexane:isopropanol 90:10 v/v, 0.5 mL/min

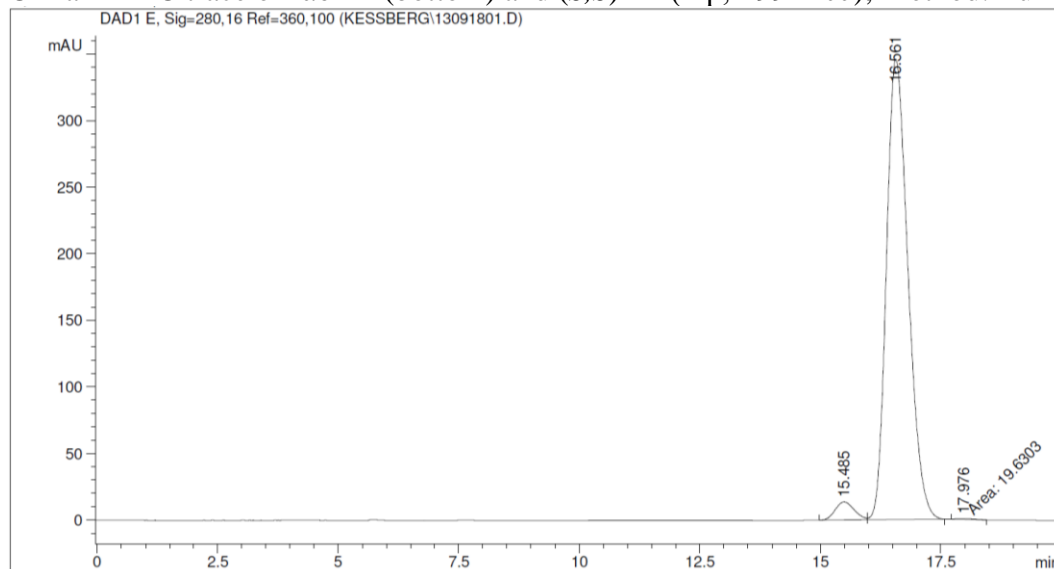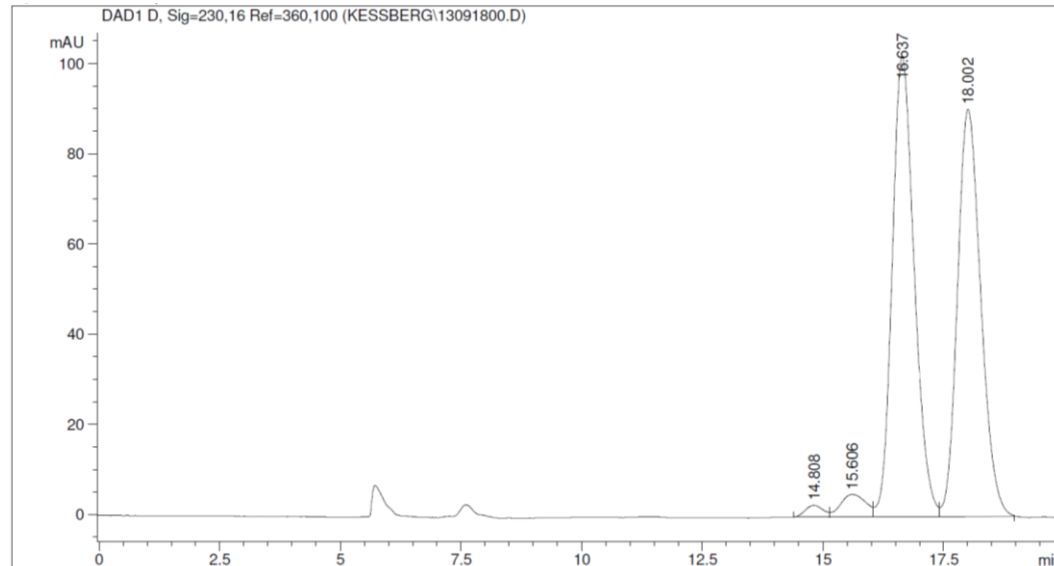

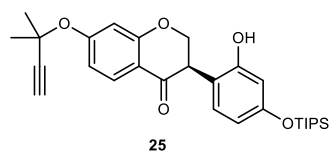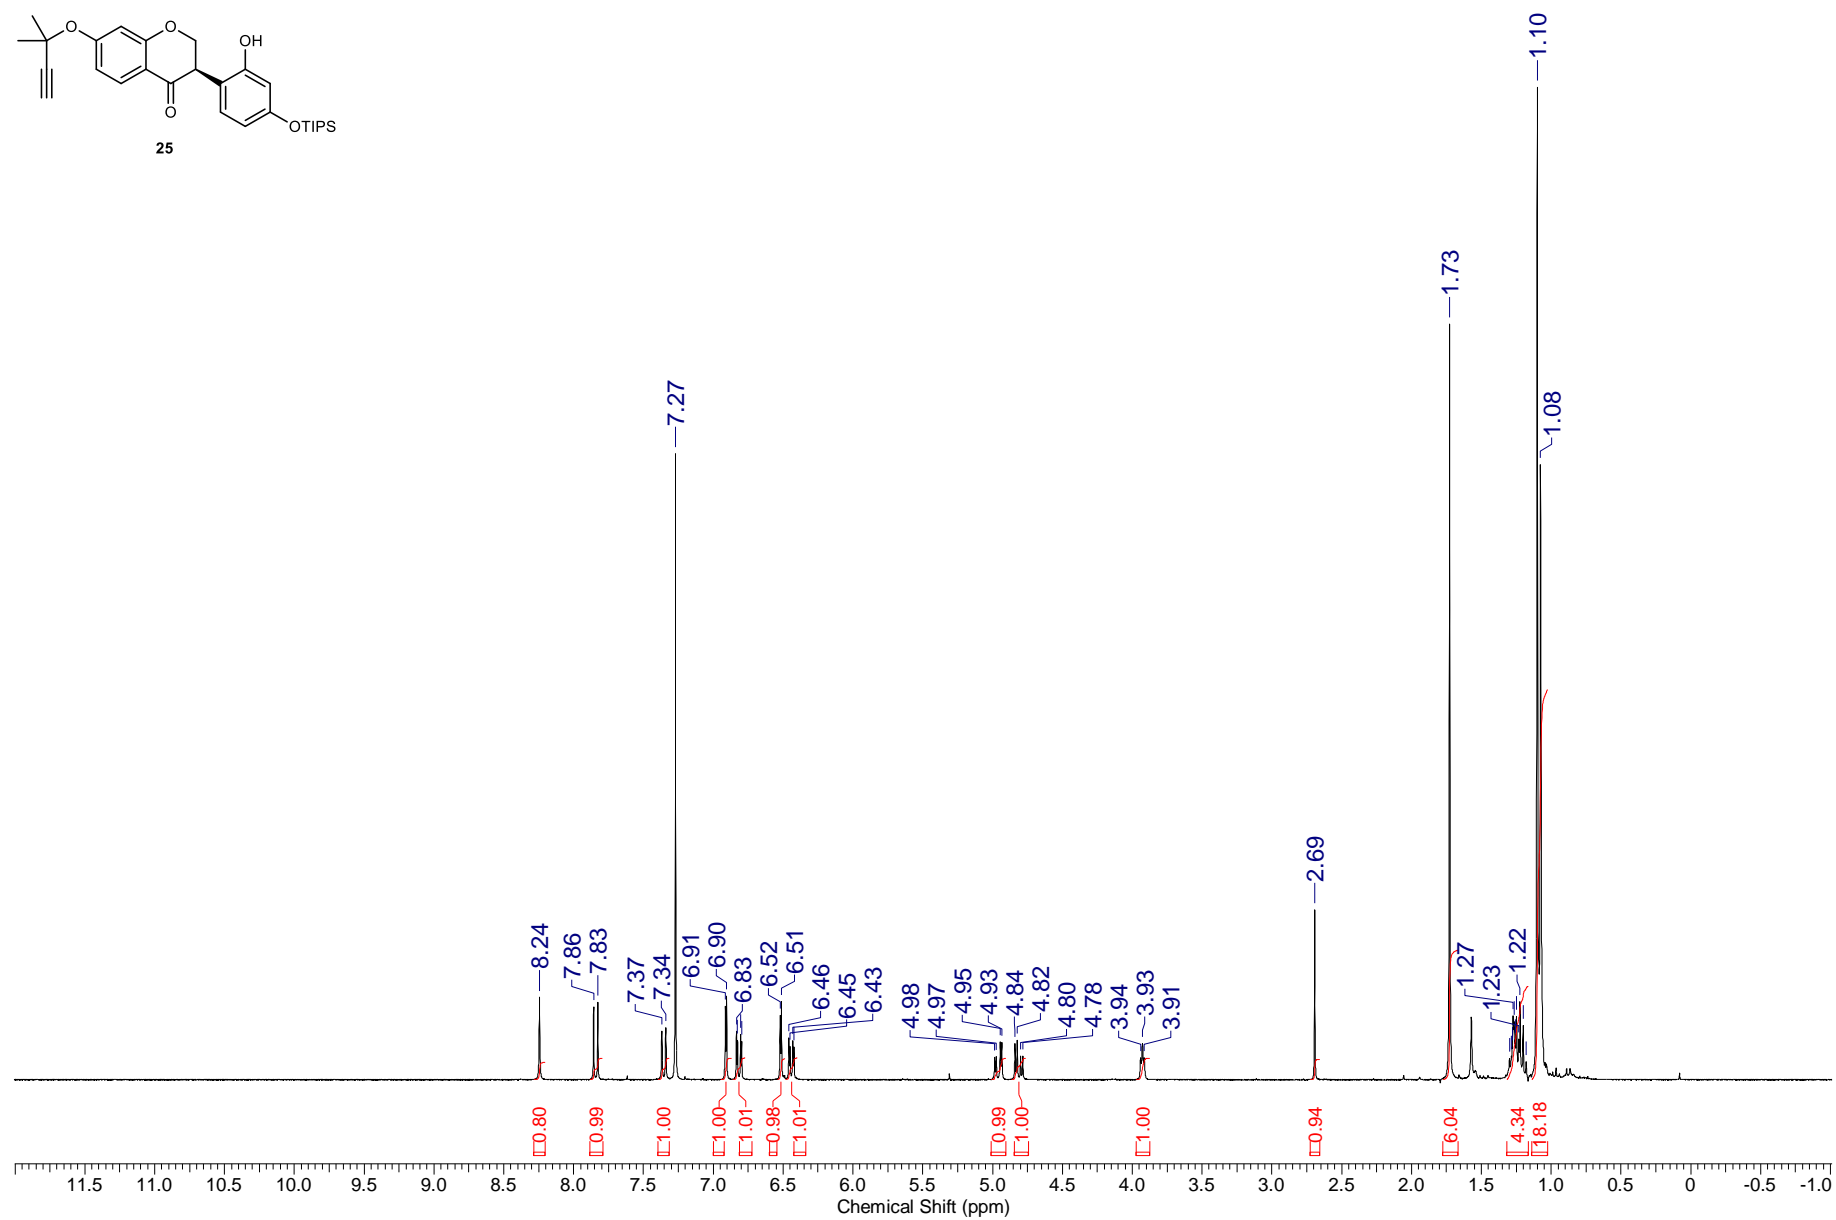

Supplementary Figure 68.  $^1\text{H}$  NMR of 25

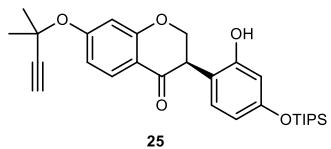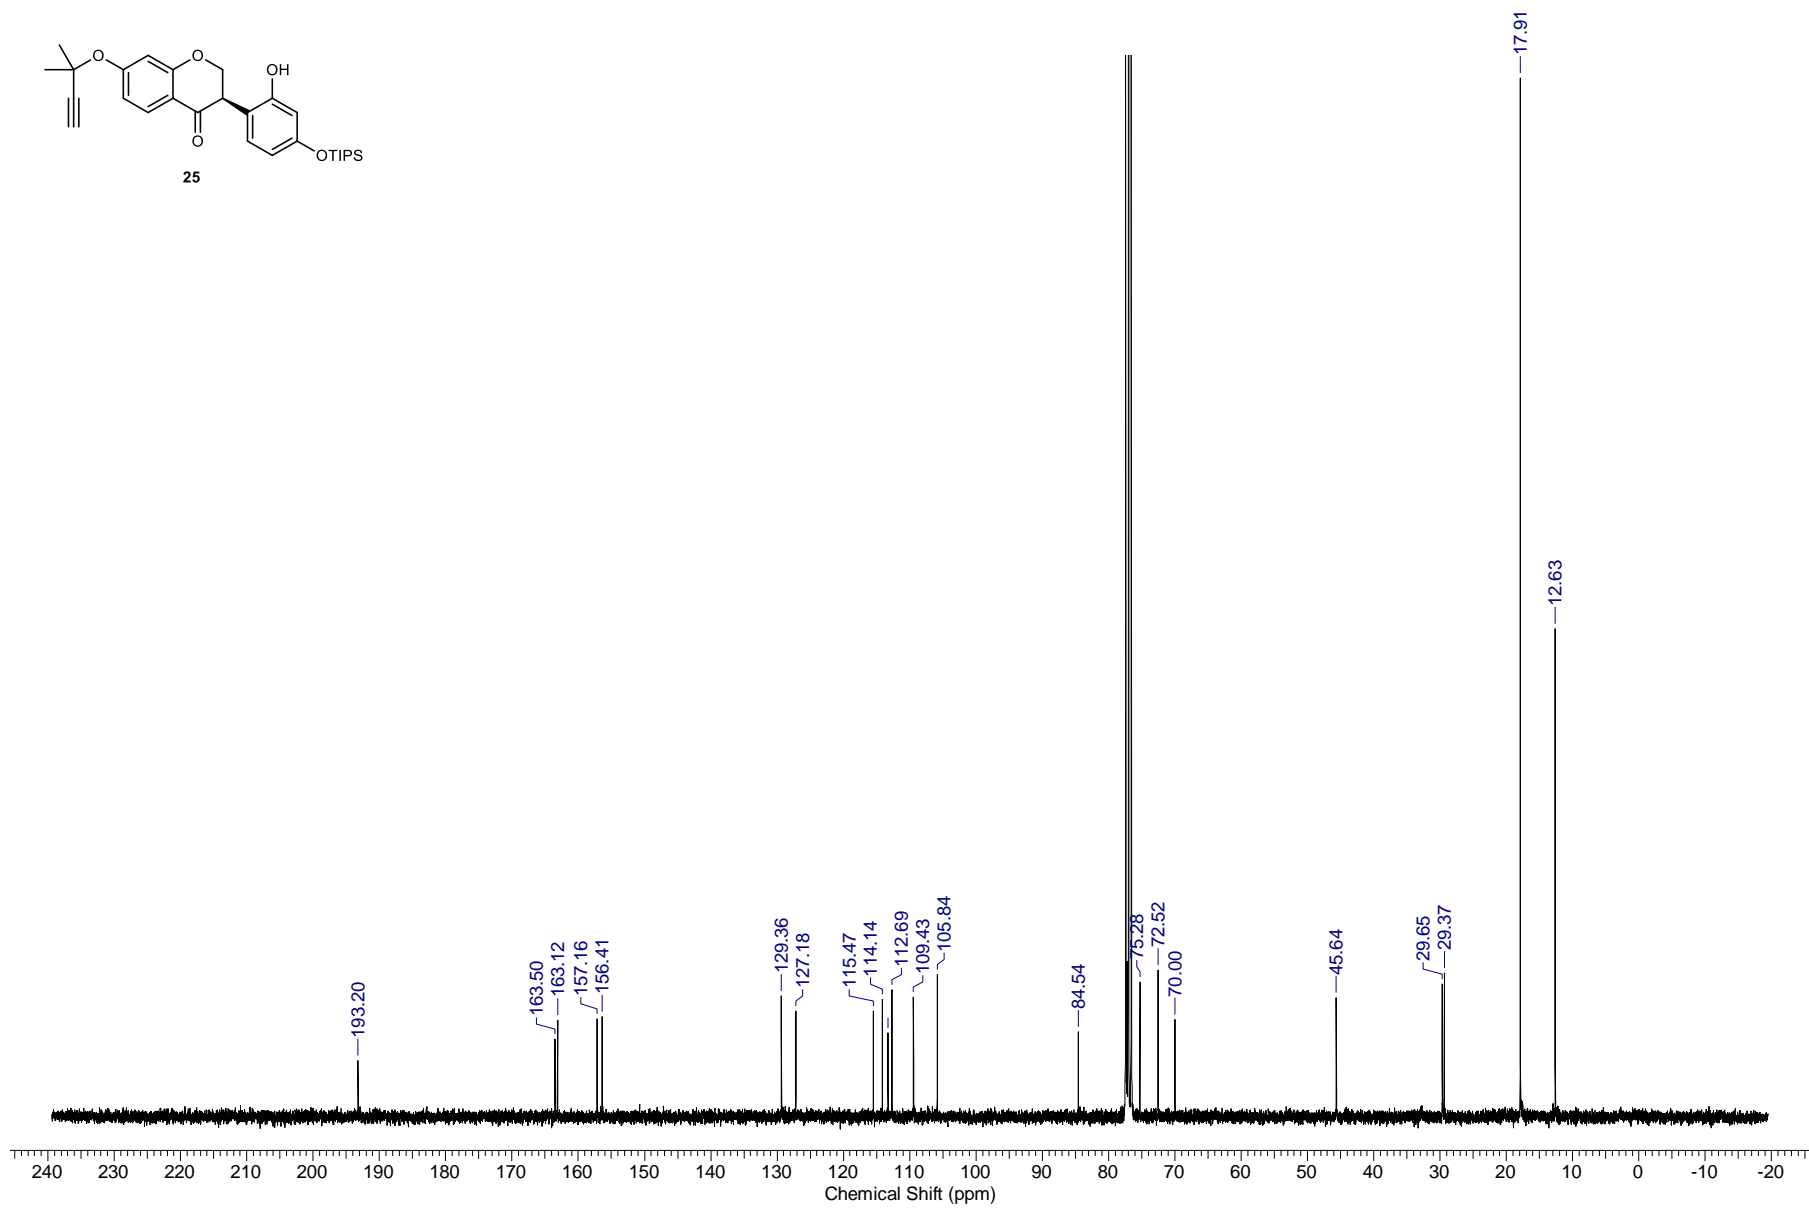

Supplementary Figure 69.  $^{13}\text{C}$  NMR of 25

Chiral HPLC trace of *rac*-**25** (bottom) and (*R*)-**25** (top, 92% *ee*); Method: Chiralpak<sup>®</sup> AD, hexane:isopropanol 90:10 *v/v*, 0.6 mL/min

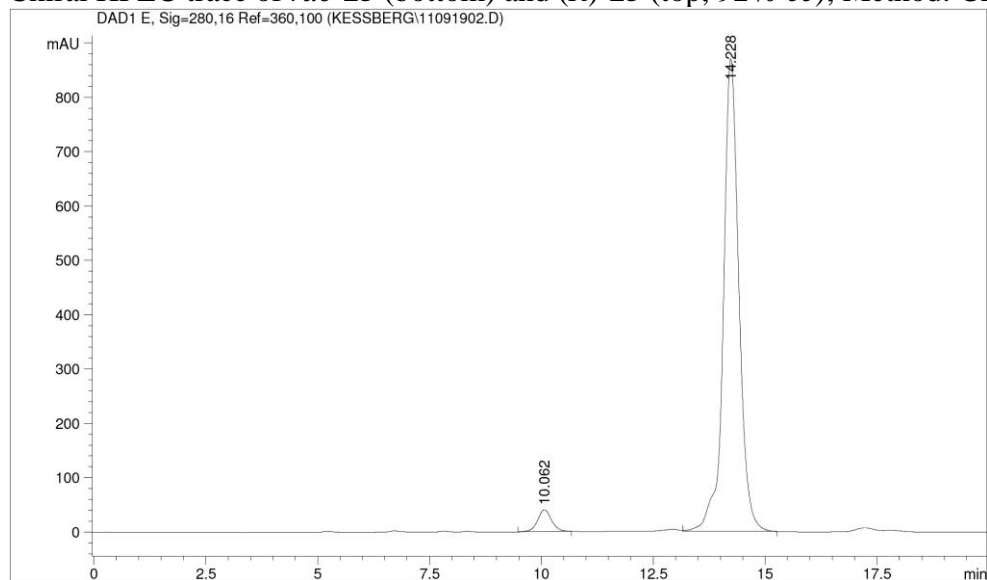

| Peak # | RetTime [min] | Type | Width [min] | Area [mAU*s] | Height [mAU] | Area %  |
|--------|---------------|------|-------------|--------------|--------------|---------|
| 1      | 10.062        | PB   | 0.3351      | 891.58655    | 40.45115     | 4.0709  |
| 2      | 14.228        | VB   | 0.3658      | 2.10097e4    | 869.89215    | 95.9291 |

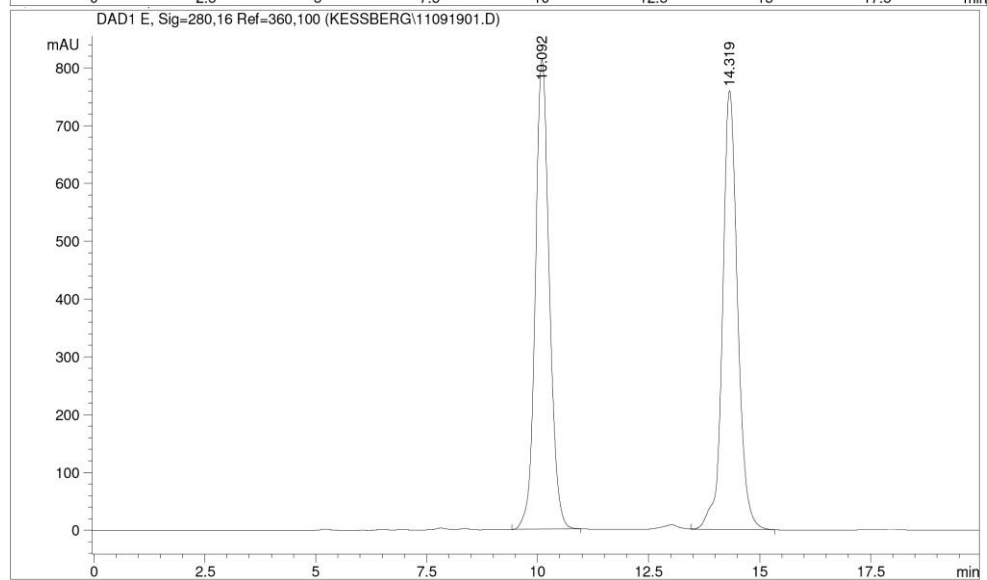



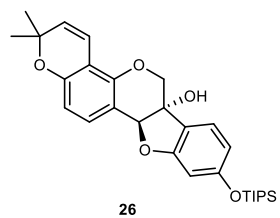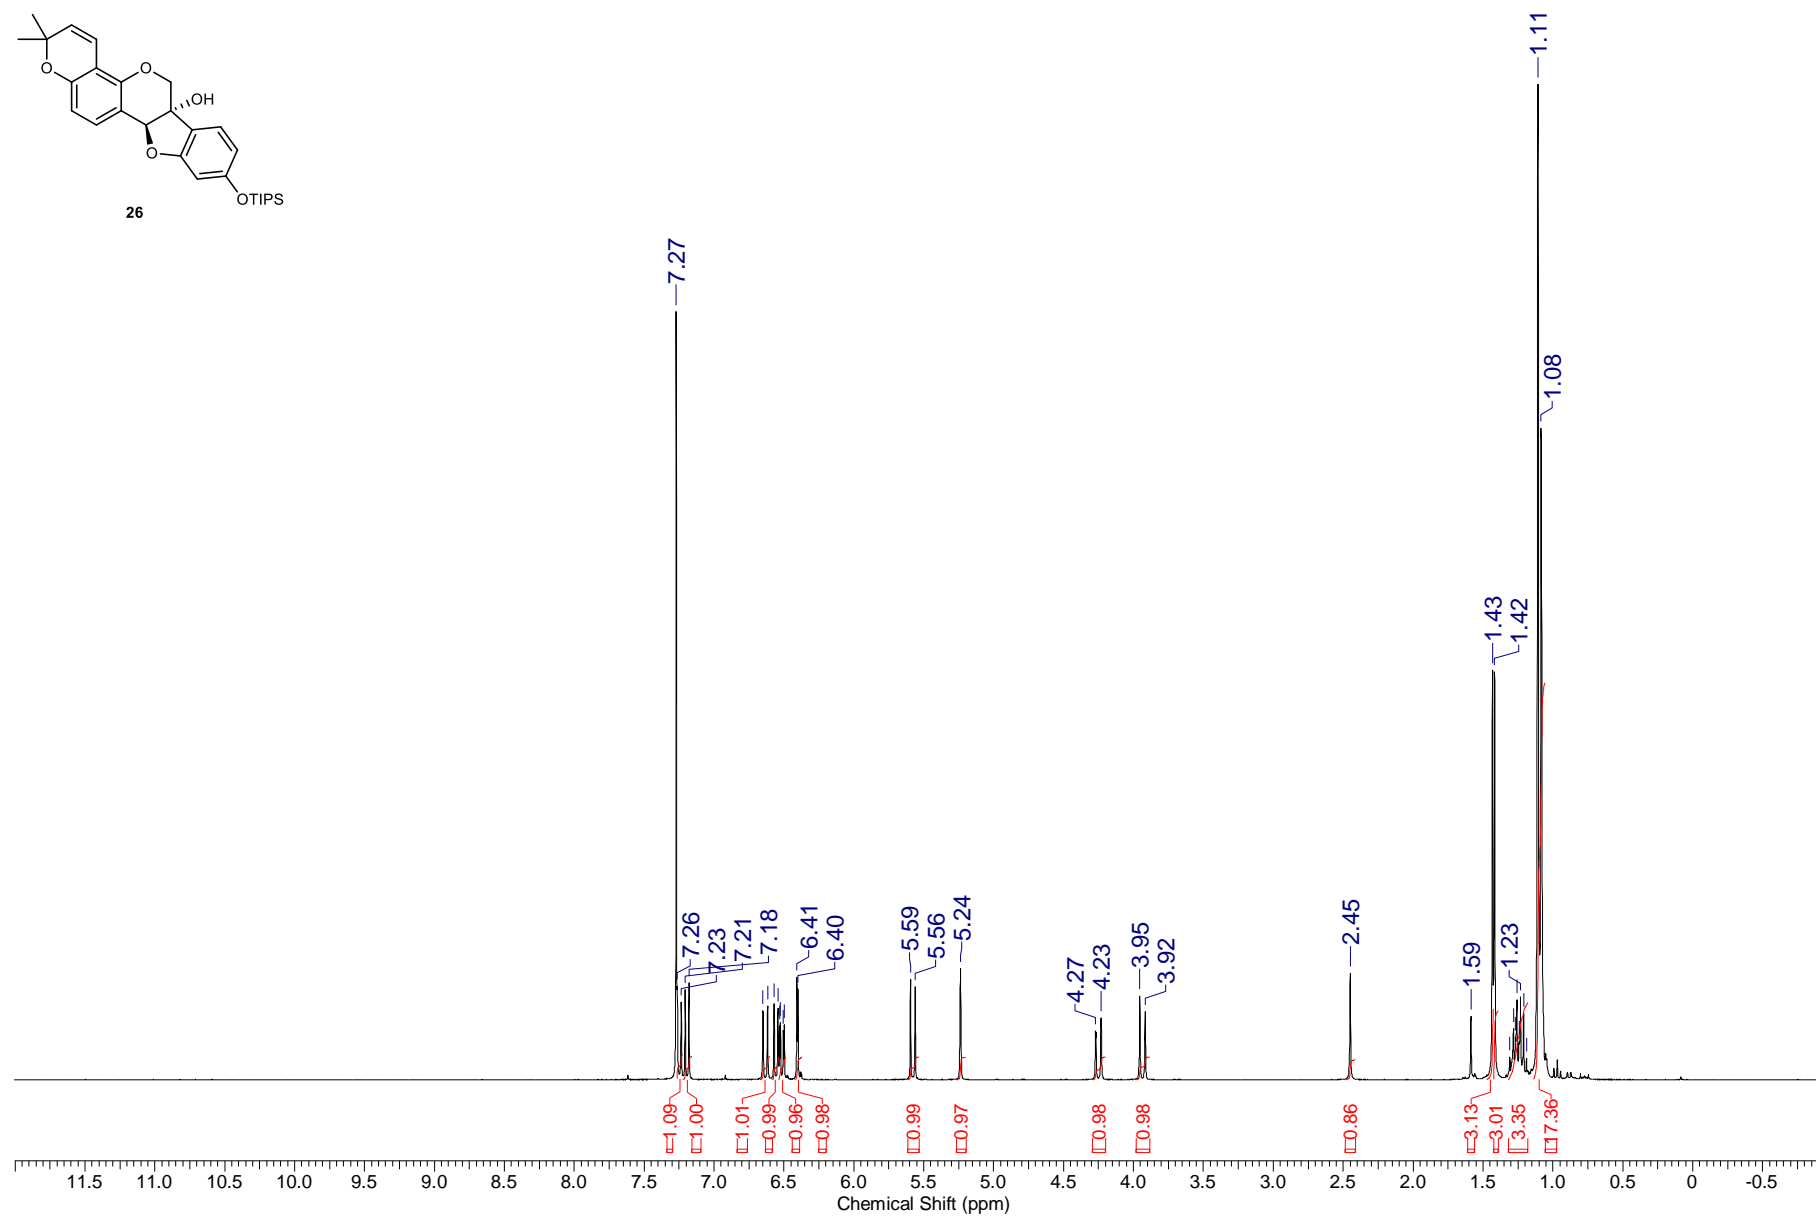

Supplementary Figure 71. <sup>1</sup>H NMR of 26

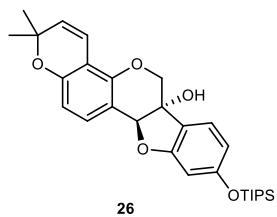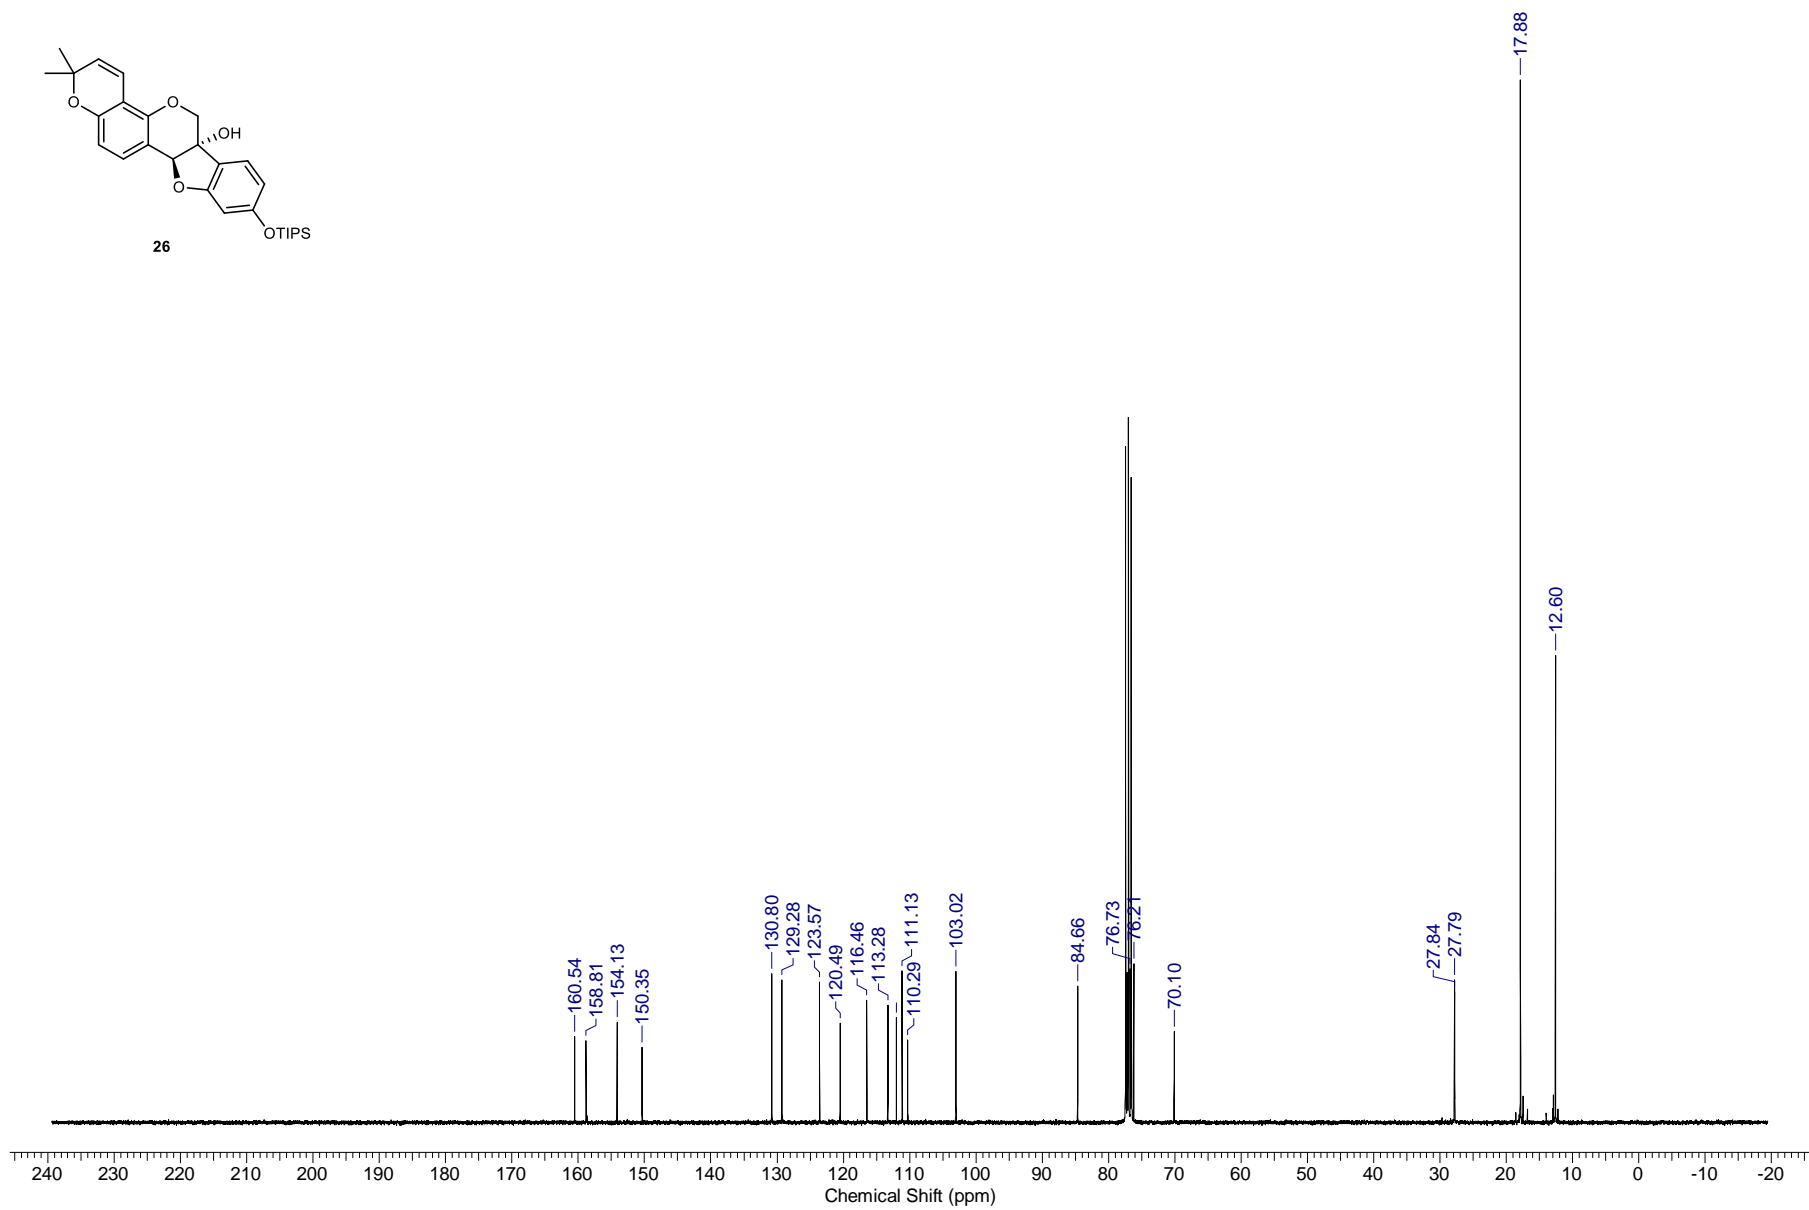

Supplementary Figure 72.  $^{13}\text{C}$  NMR of 26

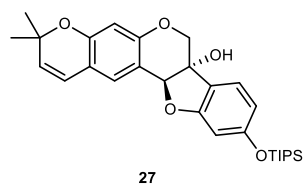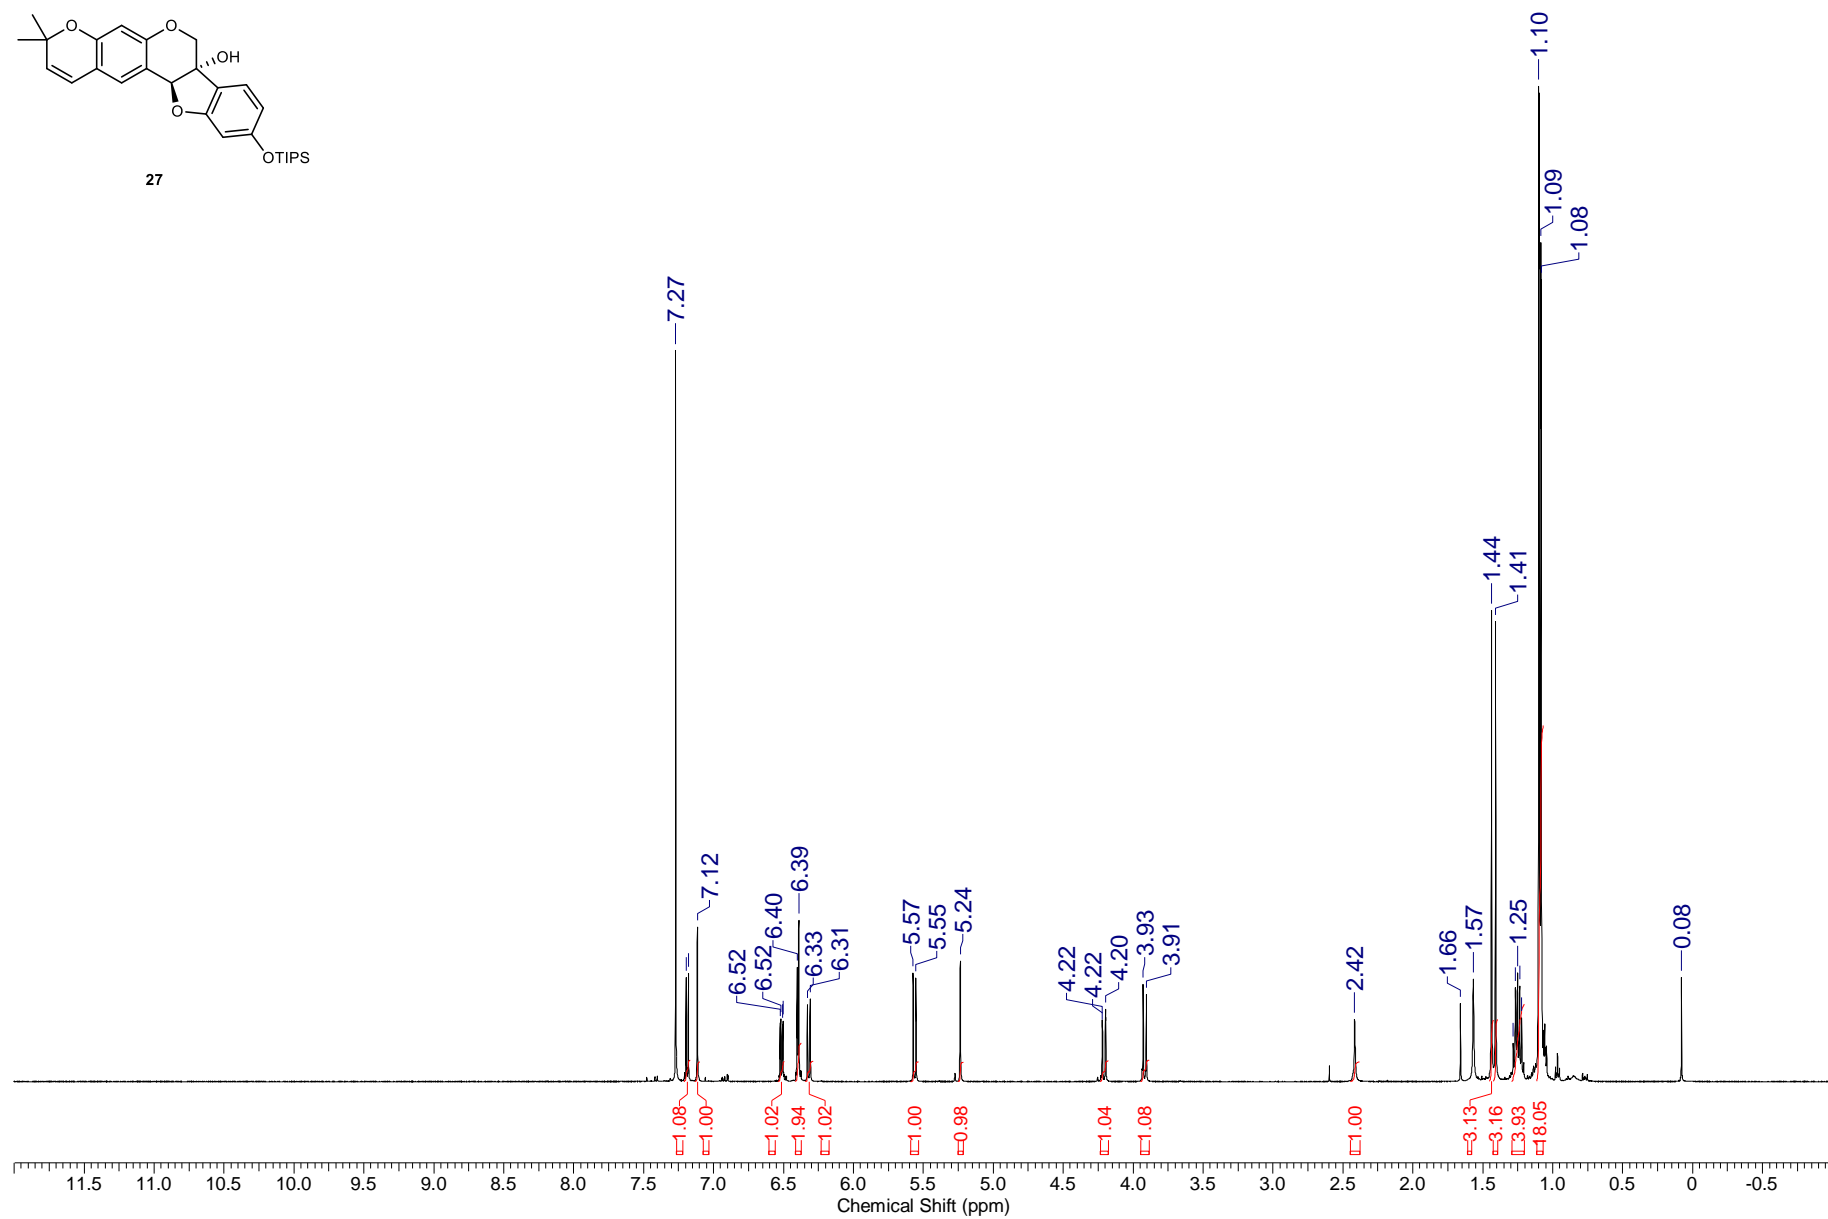

Supplementary Figure 73.  $^1\text{H}$  NMR of 27

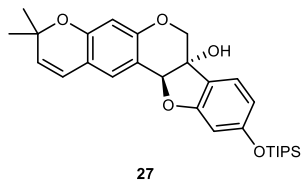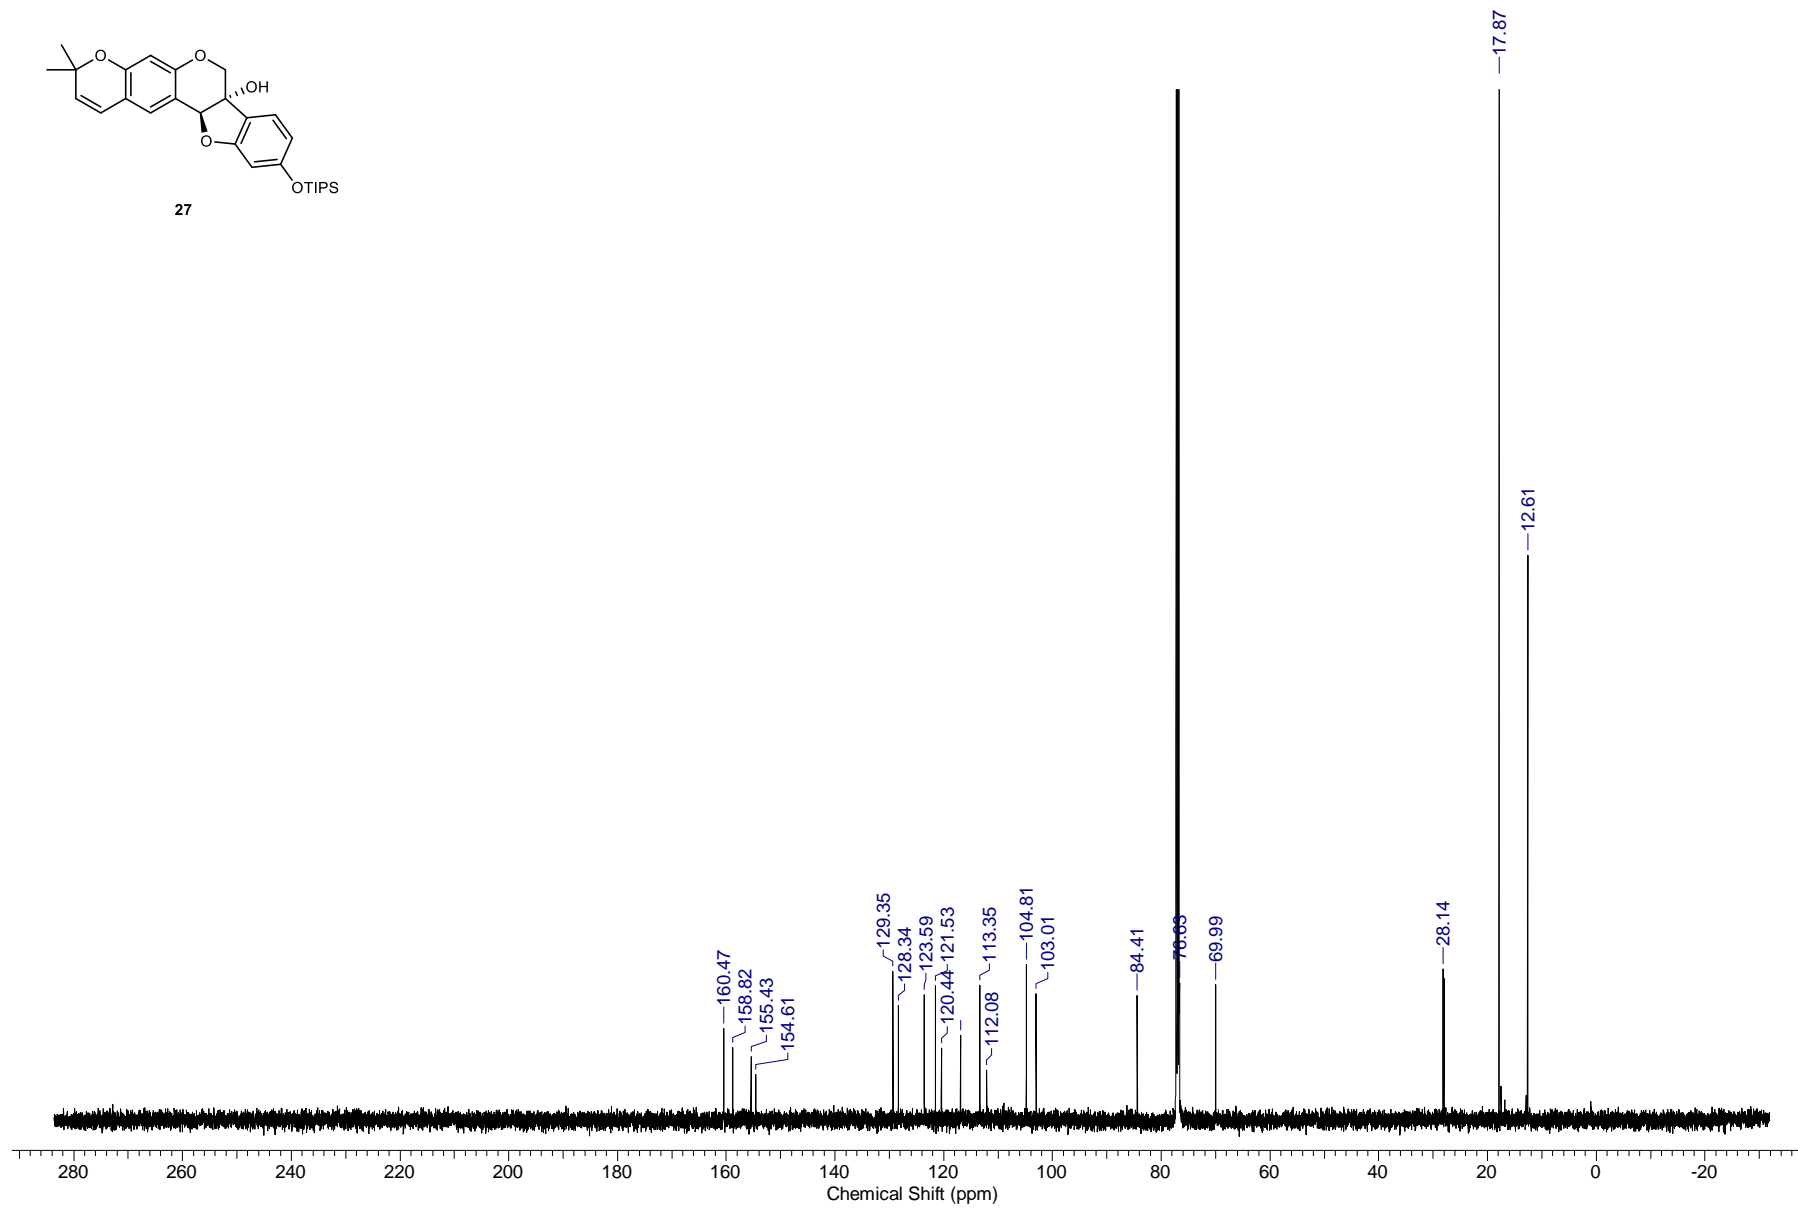

Supplementary Figure 74. <sup>13</sup>C NMR of 27

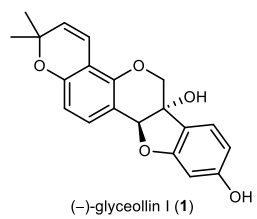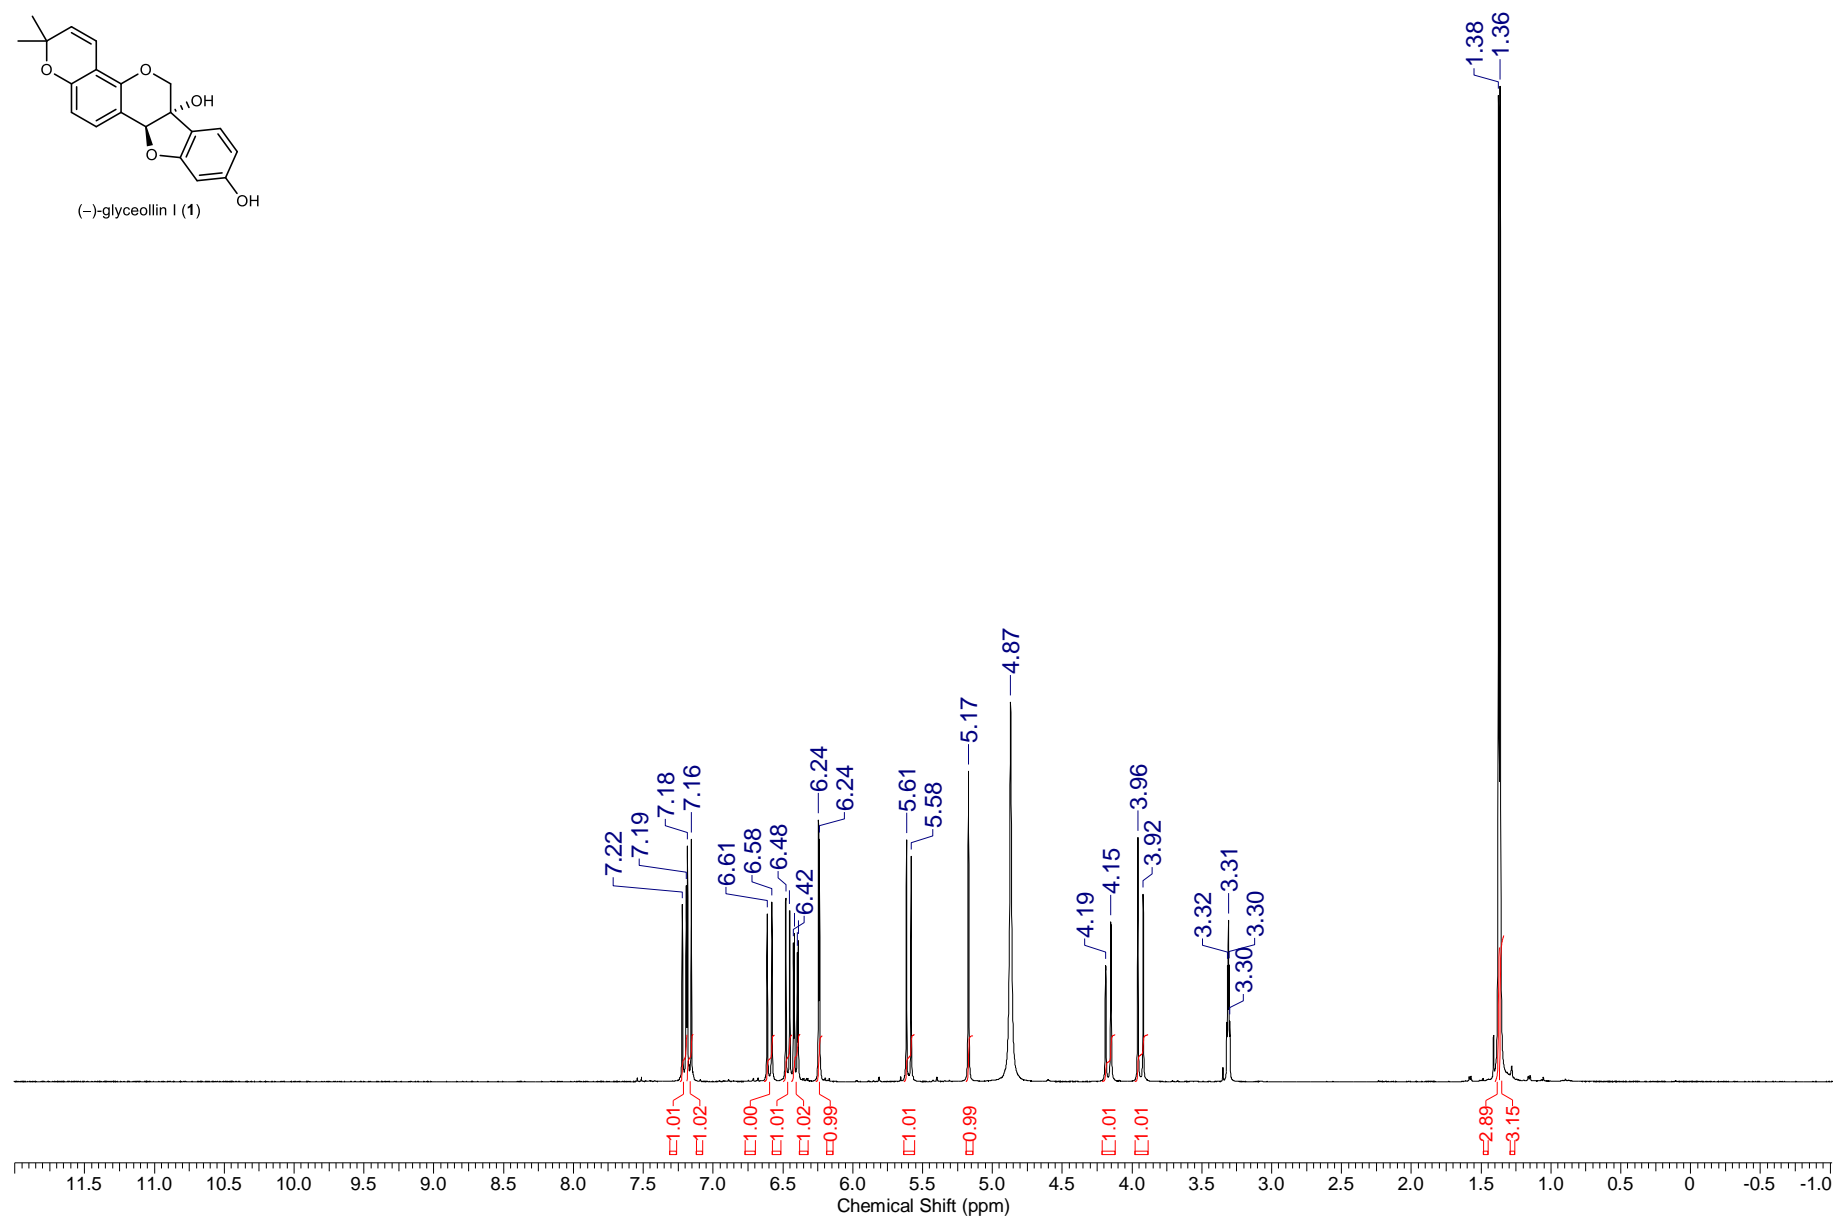

Supplementary Figure 75. <sup>1</sup>H NMR of 1

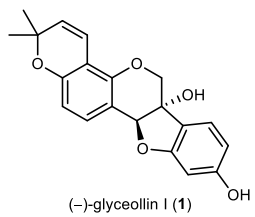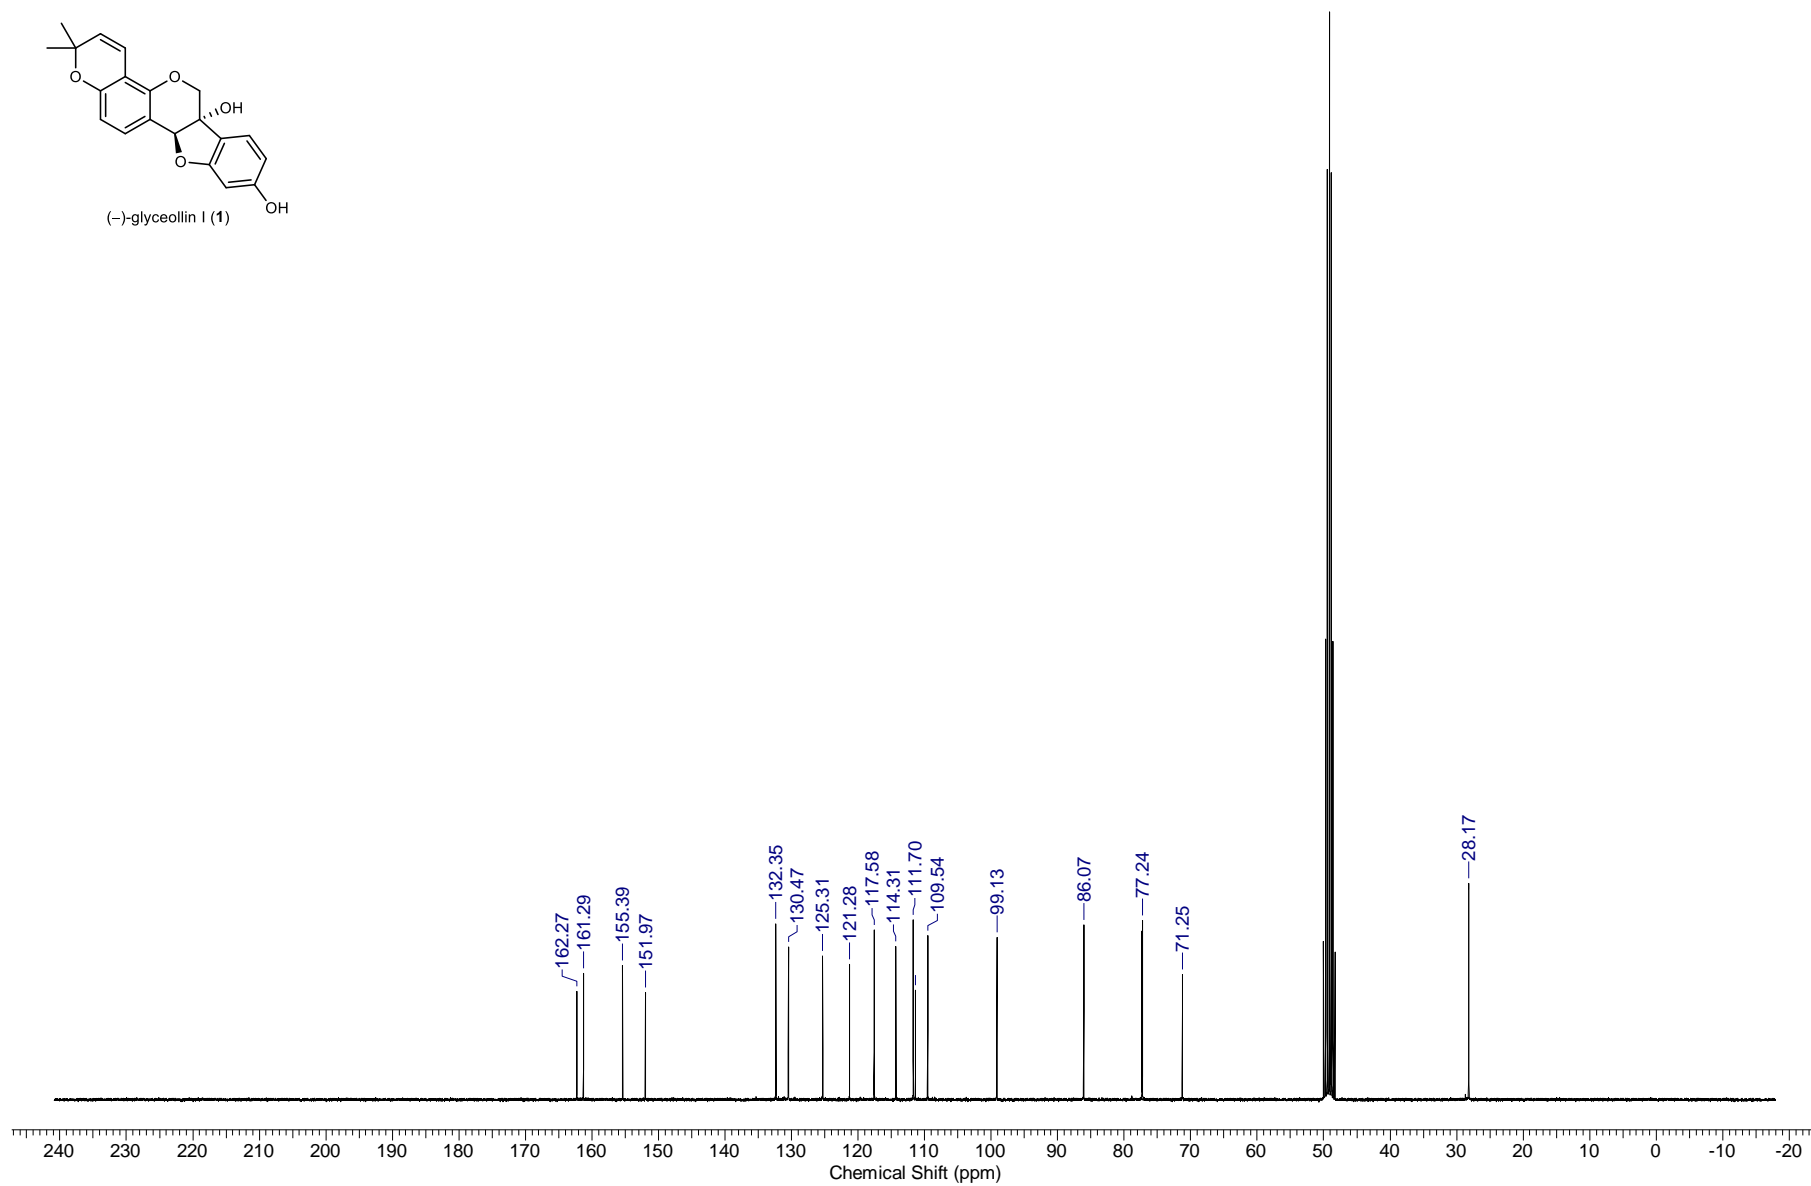

Supplementary Figure 76.  $^{13}\text{C}$  NMR of 1

Chiral HPLC trace of *rac*-glyceollin I (**1**, bottom) and (*S,S*)-glyceollin I (**1**, top, >99% *ee*); Method: Chiralpak® AD, hexane:isopropanol 80:20 v/v, 0.8 mL/min

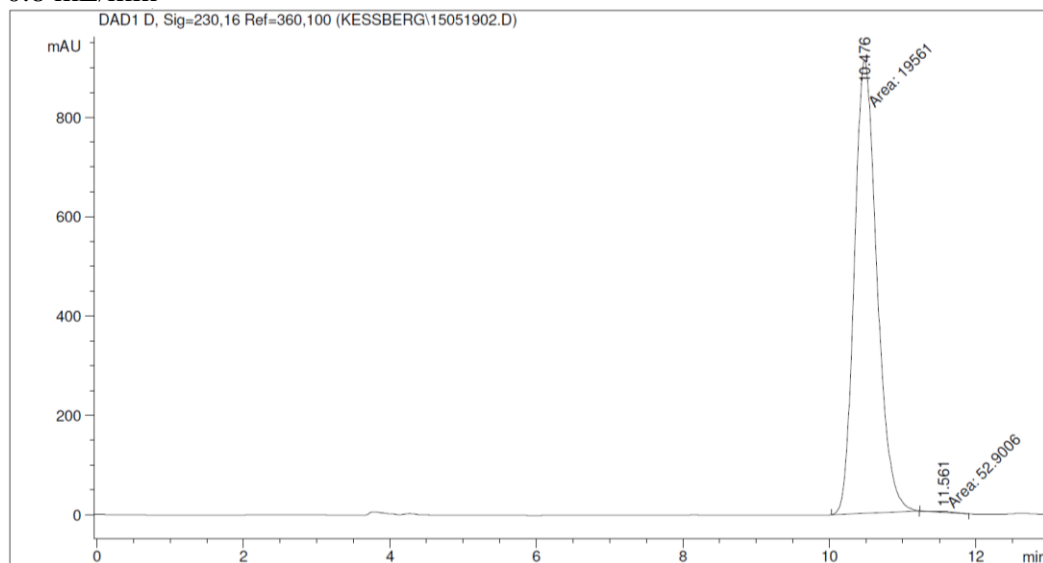

| Peak # | RetTime [min] | Type | Width [min] | Area [mAU*s] | Height [mAU] | Area %  |
|--------|---------------|------|-------------|--------------|--------------|---------|
| 1      | 10.476        | MM T | 0.3569      | 1.95610e4    | 913.46295    | 99.7303 |
| 2      | 11.561        | MM T | 0.3528      | 52.90062     | 2.71504      | 0.2697  |

Totals : 1.96139e4 916.17799

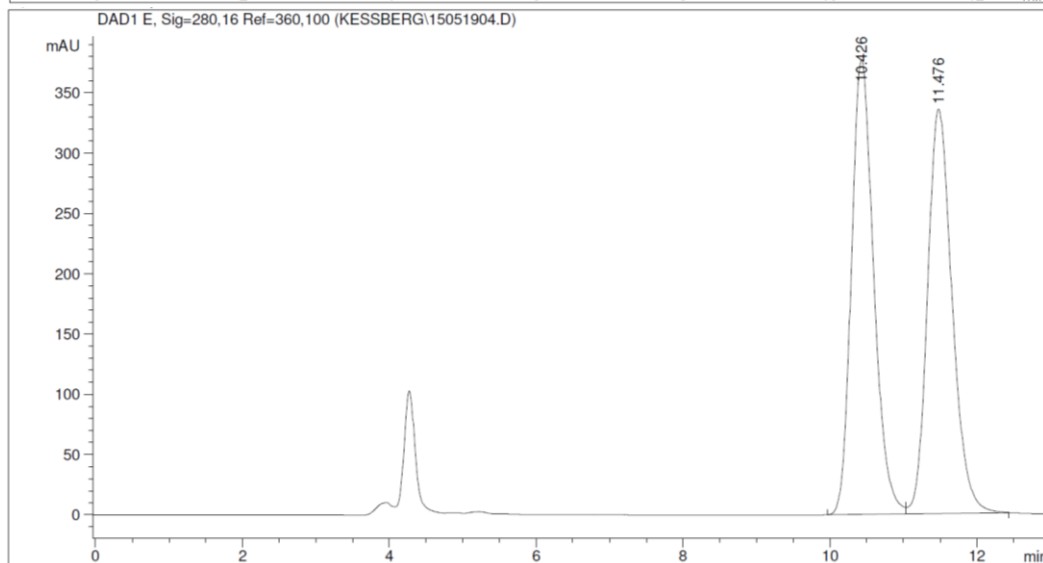

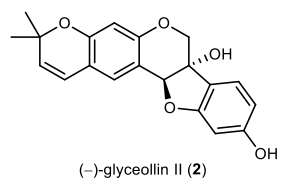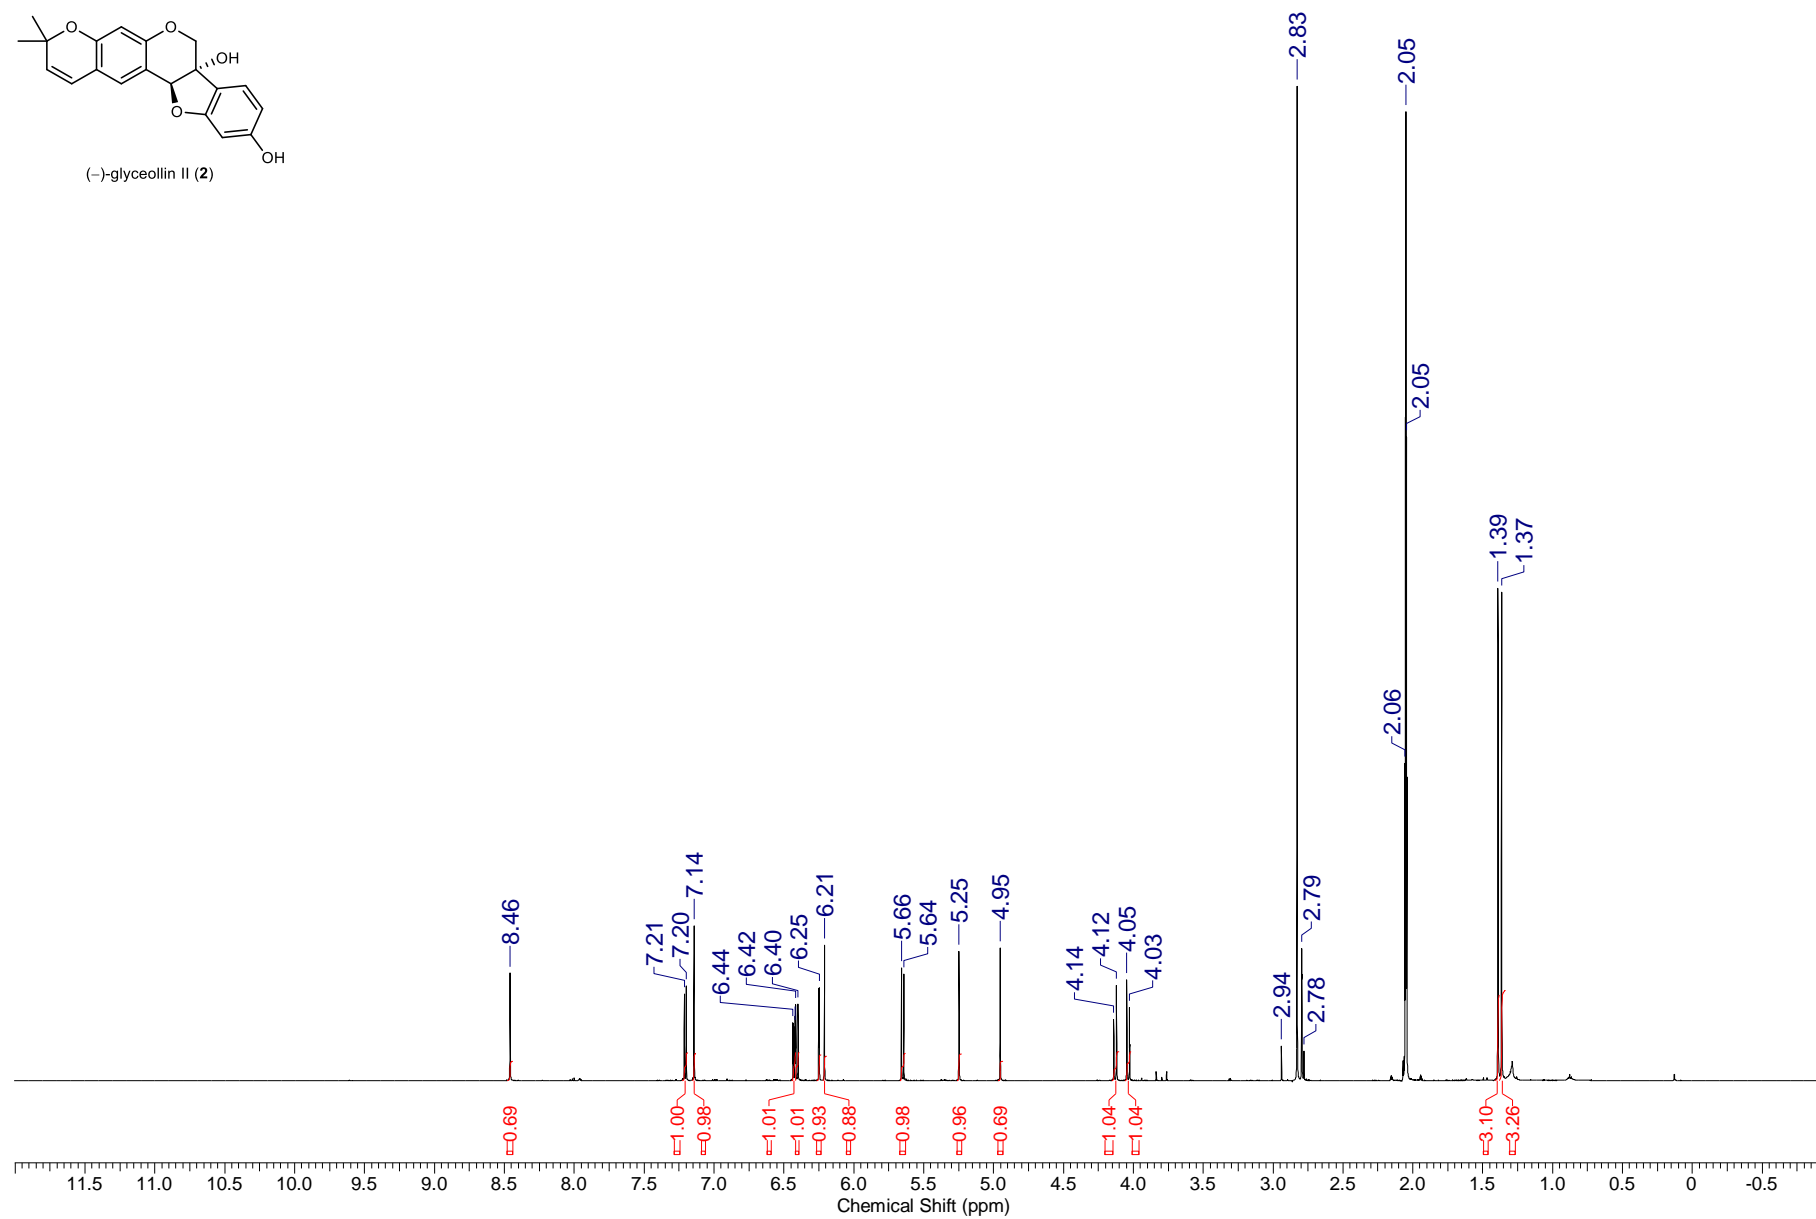

Supplementary Figure 78. <sup>1</sup>H NMR of 2



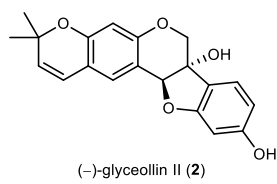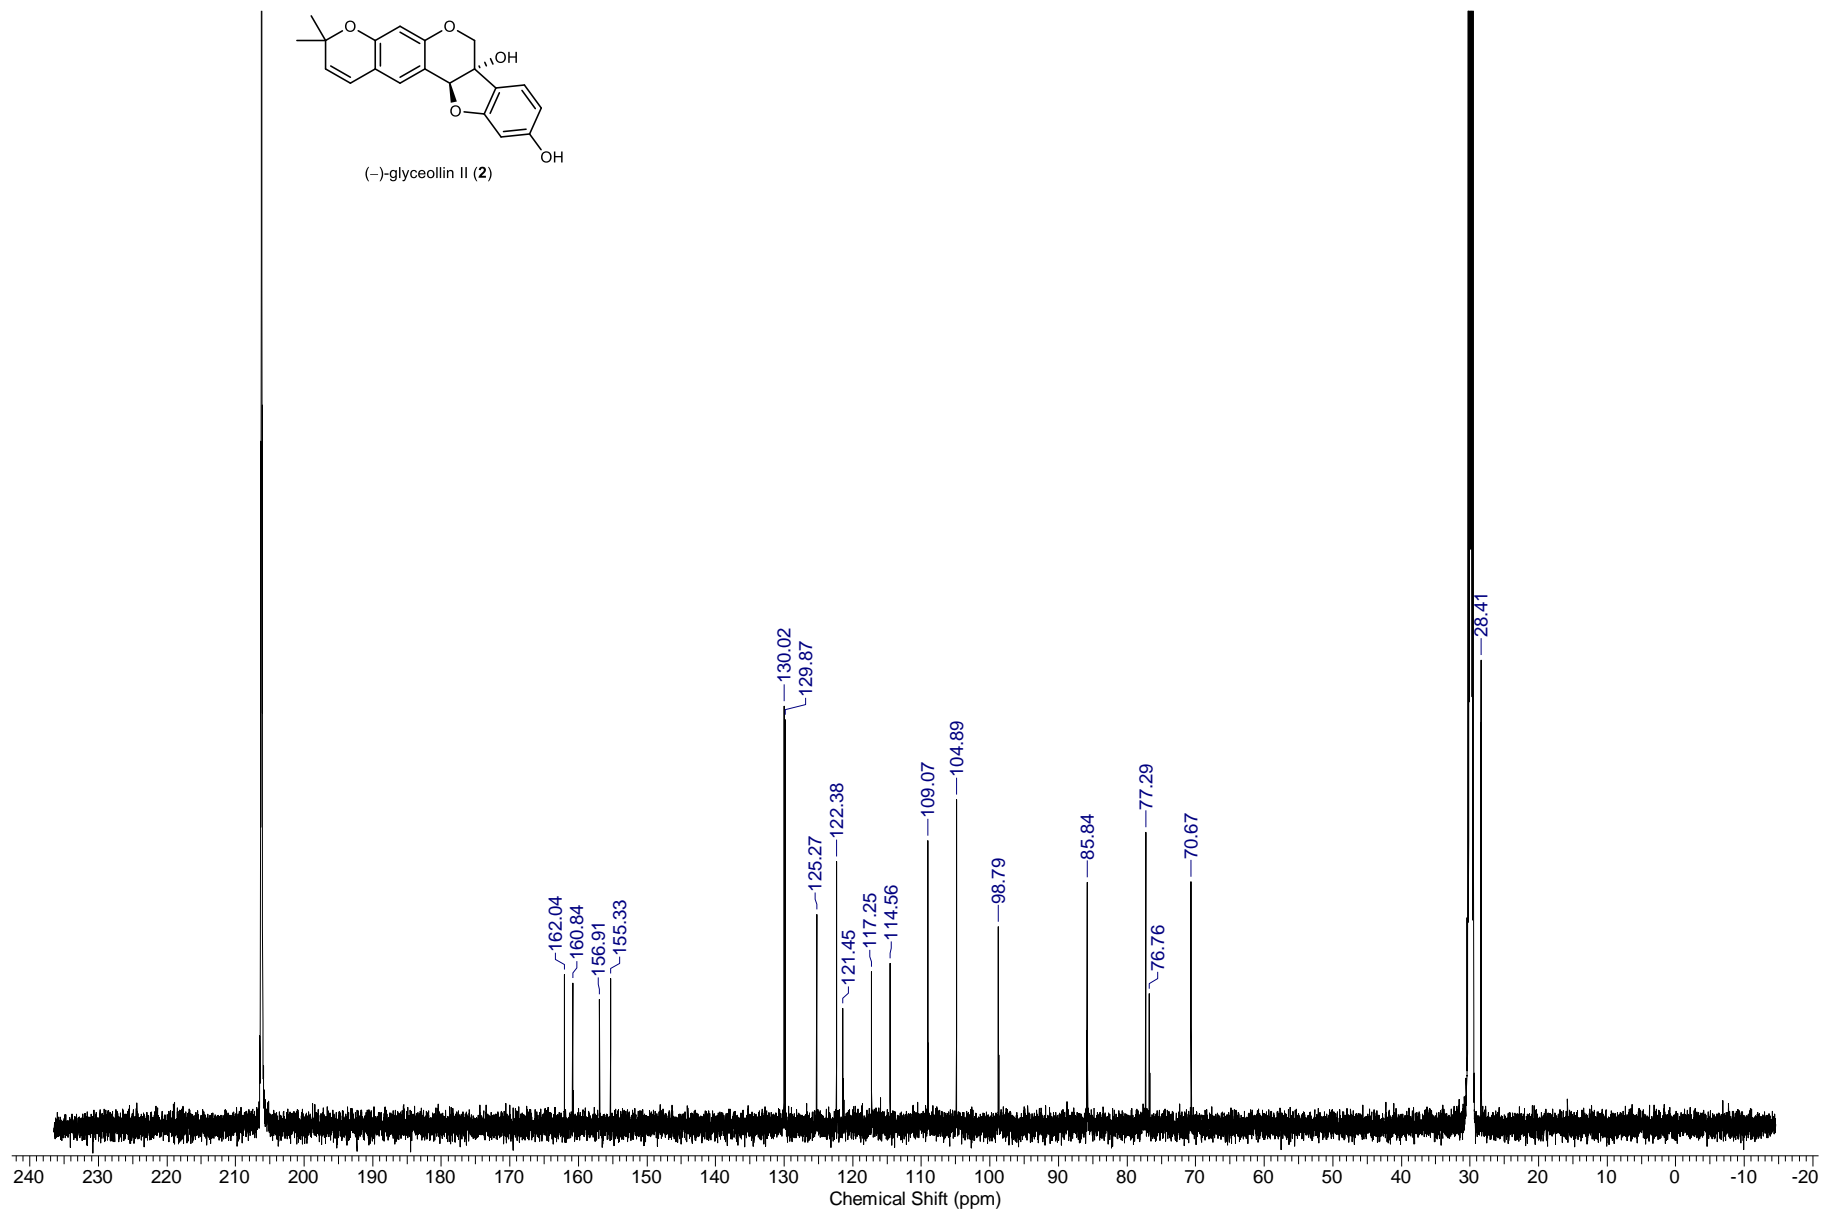

Supplementary Figure 79.  $^{13}\text{C}$  NMR of 2

Chiral HPLC trace of *rac*-glyceollin II (**2**, bottom) and (*S,S*)-glyceollin II (**2**, top, >99% *ee*); Method: Chiralpak® AD, hexane:isopropanol 80:20 *v/v*, 0.8 mL/min

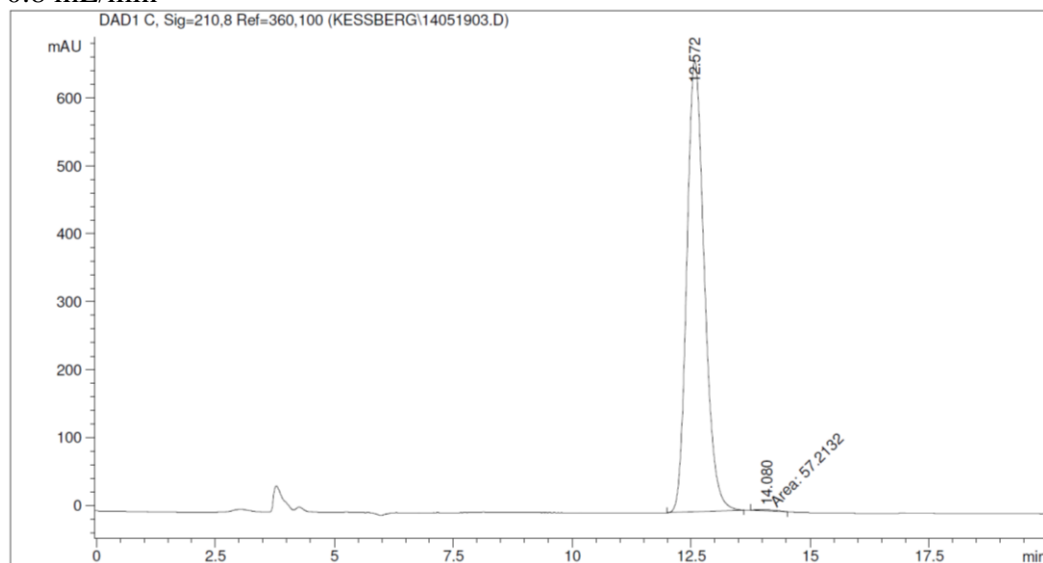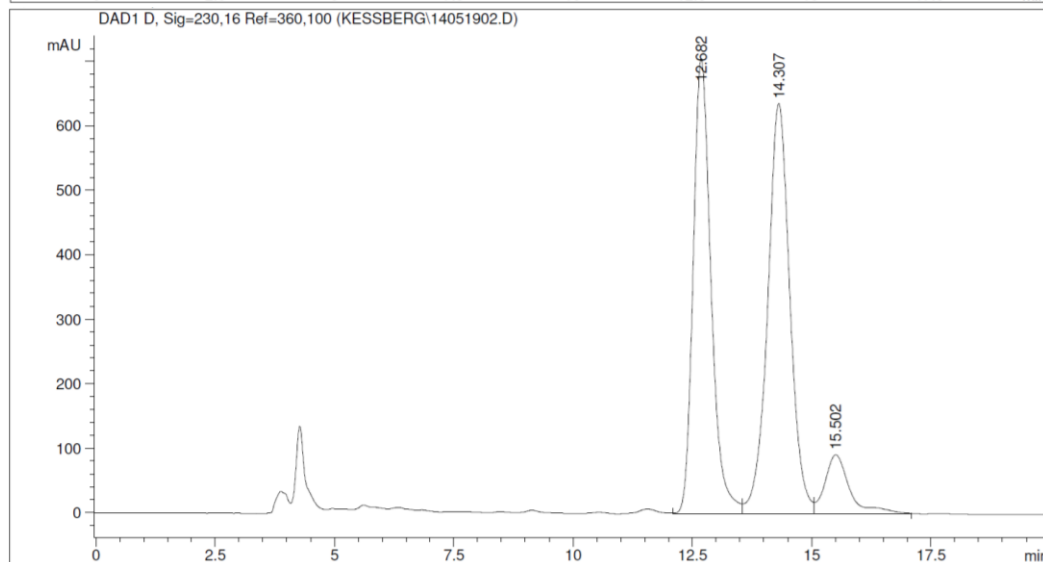

## Supplementary References

1. Baier, S. Totalsynthesen der Hydroxypterocarpane ( $\pm$ )-Glyceollin I and II sowie einiger verwandter Vertreter. (PhD thesis Technische Universität Dresden, 2013).
2. Ciesielski, P. & Metz, P. A conceptually novel construction of the 6a-hydroxypterocarpan skeleton – Synthesis of ( $\pm$ )-variabilin. *Bioorg. Med. Chem.* **25**, 6175–6177 (2017).
3. Russell, G. B., Sutherland, O. R. W., Hutchins, R. F. N. & Christmas, P. E. Vestitol: A phytoalexin with insect feeding-deterrent activity. *J. Chem. Ecol.* **4**, 571–579 (1978).
4. Yahara, S. *et al.* Isoflavan and related compounds from *dalbergia odorifera*. I. *Chem. Pharm. Bull. (Tokyo)* **37**, 979–987 (1989).
5. Chang, L. C. *et al.* Activity-guided isolation of constituents of *tephrosia purpurea* with the potential to induce the phase II enzyme, quinone reductase. *J. Nat. Prod.* **60**, 869–873 (1997).
6. Bezuidenhout, B. C. B., Brandt, E. V. & Ferreira, D. Flavonoid analogues from *pterocarpus* species. *Phytochemistry* **26**, 531–535 (1987).
7. van Aardt, T. G., van Rensburg, H. & Ferreira, D. Synthesis of isoflavonoids. Enantiopure *cis*- and *trans*-6a-hydroxypterocarpan and a racemic *trans*-pterocarpan. *Tetrahedron* **57**, 7113–7126 (2001).
8. Visser, F. R. & Lane, G. A. Selectivity of the hydrogenation of 2',4',7-tribenzyloxyisoflavone. *Aust. J. Chem.* **40**, 1705–1711 (1987).
9. Basha, G. M. *et al.* A mild and efficient protocol to synthesize chromones, isoflavones, and homoisoflavones using the complex 2,4,6-trichloro-1,3,5-triazine/dimethylformamide. *Can. J. Chem.* **91**, 763–768 (2013).
10. Aghoramurthy, K., Kukla, A. S. & Seshadri, T. R. Synthesis of 2'-hydroxy-4,7'-dimethoxyisoflavone. *J. Indian Chem. Soc.* **38**, 914–918 (1961).

11. Gammill, R. B. A new and efficient synthesis of 3-halogenated 4*H*-1-benzopyran-4-ones. *Synthesis* **1979**, 901–903 (1979).
12. Foster, A. B. *et al.* Hydroxy derivatives of tamoxifen. *J. Med. Chem.* **28**, 1491–1497 (1985).
13. Dandepally, S. R. & Williams, A. L. Liebeskind–Srogl cross coupling mediated synthesis of verbenachalcone. *Tetrahedron Lett.* **51**, 5753–5756 (2010).
14. Luniwal, A. *et al.* Multigram synthesis of glyceollin I. *Org. Process Res. Dev.* **15**, 1149–1162 (2011).
15. Lyne, R. L., Mulheirn, L. J. & Leworthy, D. P. New pterocarpinoid phytoalexins of soybean. *J. Chem. Soc. Chem. Commun.* 497–498 (1976).
